# Supplementary material
Source: MDPI journal article supplement (https://www.mdpi.com/2304-6740/12/5/138)

## checkCIF/PLATON report

Structure factors have been supplied for datablock(s) I

THIS REPORT IS FOR GUIDANCE ONLY. IF USED AS PART OF A REVIEW PROCEDURE FOR PUBLICATION, IT SHOULD NOT REPLACE THE EXPERTISE OF AN EXPERIENCED CRYSTALLOGRAPHIC REFEREE.

No syntax errors found. CIF dictionary Interpreting this report

## Datablock: I

|                 |                |                    |              |
|-----------------|----------------|--------------------|--------------|
| Bond precision: | C-C = 0.0092 Å | Wavelength=0.71073 |              |
| Cell:           | a=16.604 (8)   | b=24.002 (13)      | c=14.571 (8) |
|                 | alpha=90       | beta=103.381 (12)  | gamma=90     |
| Temperature:    | 295 K          |                    |              |

|                        | Calculated           | Reported              |
|------------------------|----------------------|-----------------------|
| Volume                 | 5649(5)              | 5649(5)               |
| Space group            | P 21/c               | P 1 21/c 1            |
| Hall group             | -P 2ybc              | ?                     |
| Moiety formula         | C28 H18 Br4 N2 Ni O4 | C28 H18 Br4 N2 Ni1 O4 |
| Sum formula            | C28 H18 Br4 N2 Ni O4 | C28 H18 Br4 N2 Ni1 O4 |
| Mr                     | 824.73               | 824.79                |
| Dx, g cm <sup>-3</sup> | 1.939                | 1.939                 |
| Z                      | 8                    | 8                     |
| Mu (mm <sup>-1</sup> ) | 6.383                | 6.383                 |
| F000                   | 3200.0               | 3200.0                |
| F000'                  | 3195.22              |                       |
| h, k, lmax             | 20, 29, 17           | 20, 29, 17            |
| Nref                   | 10892                | 10738                 |
| Tmin, Tmax             | 0.415, 0.496         | 0.460, 0.500          |
| Tmin'                  | 0.369                |                       |

```
Correction method= # Reported T Limits: Tmin=0.460 Tmax=0.500
AbsCorr = NUMERICAL
```

Data completeness= 0.986                      Theta (max)= 25.820

```
R(reflections)= 0.0381( 7018)      wR2(reflections)=
S = 1.000                        0.1187( 7018)
Npar= 703
```

---

The following ALERTS were generated. Each ALERT has the format

**test-name\_ALERT\_alert-type\_alert-level.**

Click on the hyperlinks for more details of the test.

---

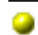

### Alert level C

|                   |                                                  |         |        |              |
|-------------------|--------------------------------------------------|---------|--------|--------------|
| PLAT041_ALERT_1_C | Calc. and Reported SumFormula                    | Strings | Differ | Please Check |
|                   | Calc: C28 H18 Br4 N2 Ni O4                       |         |        |              |
|                   | Rep.: C28 H18 Br4 N2 Ni1 O4                      |         |        |              |
| PLAT042_ALERT_1_C | Calc. and Reported MoietyFormula                 | Strings | Differ | Please Check |
|                   | Calc: C28 H18 Br4 N2 Ni O4                       |         |        |              |
|                   | Rep.: C28 H18 Br4 N2 Ni1 O4                      |         |        |              |
| PLAT341_ALERT_3_C | Low Bond Precision on C-C Bonds .....            |         |        | 0.00918 Ang. |
| PLAT910_ALERT_3_C | Missing # of FCF Reflection(s) Below Theta(Min). |         |        | 6 Note       |
|                   | 1 0 0, 1 1 0, 0 2 0, 1 2 0, -1 1 1,              |         |        | 0 1 1,       |
| PLAT911_ALERT_3_C | Missing FCF Refl Between Thmin & STh/L=          | 0.600   |        | 20 Report    |
|                   | 2 1 0, 2 2 0, 1 3 0, -2 1 1, 1 1 1,              |         |        | -2 2 1,      |
|                   | 1 2 1, -1 3 1, 0 3 1, -2 0 2, -1 0 2,            |         |        | -2 1 2,      |
|                   | -1 1 2, 0 1 2, -2 0 4, -12 19 10, -11 20 10,     |         |        | -14 15 11,   |
|                   | 8 15 11, -13 15 12,                              |         |        |              |

---

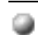

### Alert level G

|                   |                                                            |              |
|-------------------|------------------------------------------------------------|--------------|
| PLAT769_ALERT_4_G | CIF Embedded Explicitly Supplied Scattering Data           | Please Note  |
| PLAT794_ALERT_5_G | Tentative Bond Valency for Ni1 (II) .                      | 2.03 Info    |
| PLAT794_ALERT_5_G | Tentative Bond Valency for Ni2 (II) .                      | 2.00 Info    |
| PLAT808_ALERT_5_G | No Parseable SHELXL Style Weighting Scheme Found           | Please Check |
| PLAT882_ALERT_1_G | No Datum for _diffn_reflms_av_unetI/netI .....             | Please Do !  |
| PLAT912_ALERT_4_G | Missing # of FCF Reflections Above STh/L= 0.600            | 136 Note     |
| PLAT913_ALERT_3_G | Missing # of Very Strong Reflections in FCF ....           | 1 Note       |
|                   | -2 0 4,                                                    |              |
| PLAT929_ALERT_5_G | No Weight Pars,Obs and Calc R1,wR2,S not Checked           | ! Info       |
| PLAT960_ALERT_3_G | Number of Intensities with I < - 2*sig(I) ...              | 195 Check    |
| PLAT969_ALERT_5_G | The 'Henn et al.' R-Factor-gap value .....                 | 6.27 Note    |
|                   | Predicted wR2: Based on SigI**2 1.36 or SHELX Weight 11.13 |              |

---

- 0 **ALERT level A** = Most likely a serious problem - resolve or explain  
0 **ALERT level B** = A potentially serious problem, consider carefully  
5 **ALERT level C** = Check. Ensure it is not caused by an omission or oversight  
10 **ALERT level G** = General information/check it is not something unexpected
- 3 ALERT type 1 CIF construction/syntax error, inconsistent or missing data  
0 ALERT type 2 Indicator that the structure model may be wrong or deficient  
5 ALERT type 3 Indicator that the structure quality may be low  
2 ALERT type 4 Improvement, methodology, query or suggestion  
5 ALERT type 5 Informative message, check
- 
-

It is advisable to attempt to resolve as many as possible of the alerts in all categories. Often the minor alerts point to easily fixed oversights, errors and omissions in your CIF or refinement strategy, so attention to these fine details can be worthwhile. In order to resolve some of the more serious problems it may be necessary to carry out additional measurements or structure refinements. However, the purpose of your study may justify the reported deviations and the more serious of these should normally be commented upon in the discussion or experimental section of a paper or in the "special\_details" fields of the CIF. checkCIF was carefully designed to identify outliers and unusual parameters, but every test has its limitations and alerts that are not important in a particular case may appear. Conversely, the absence of alerts does not guarantee there are no aspects of the results needing attention. It is up to the individual to critically assess their own results and, if necessary, seek expert advice.

### **Publication of your CIF in IUCr journals**

A basic structural check has been run on your CIF. These basic checks will be run on all CIFs submitted for publication in IUCr journals (*Acta Crystallographica*, *Journal of Applied Crystallography*, *Journal of Synchrotron Radiation*); however, if you intend to submit to *Acta Crystallographica Section C* or *E* or *IUCrData*, you should make sure that full publication checks are run on the final version of your CIF prior to submission.

### **Publication of your CIF in other journals**

Please refer to the *Notes for Authors* of the relevant journal for any special instructions relating to CIF submission.

Datablock 1 - ellipsoid plot

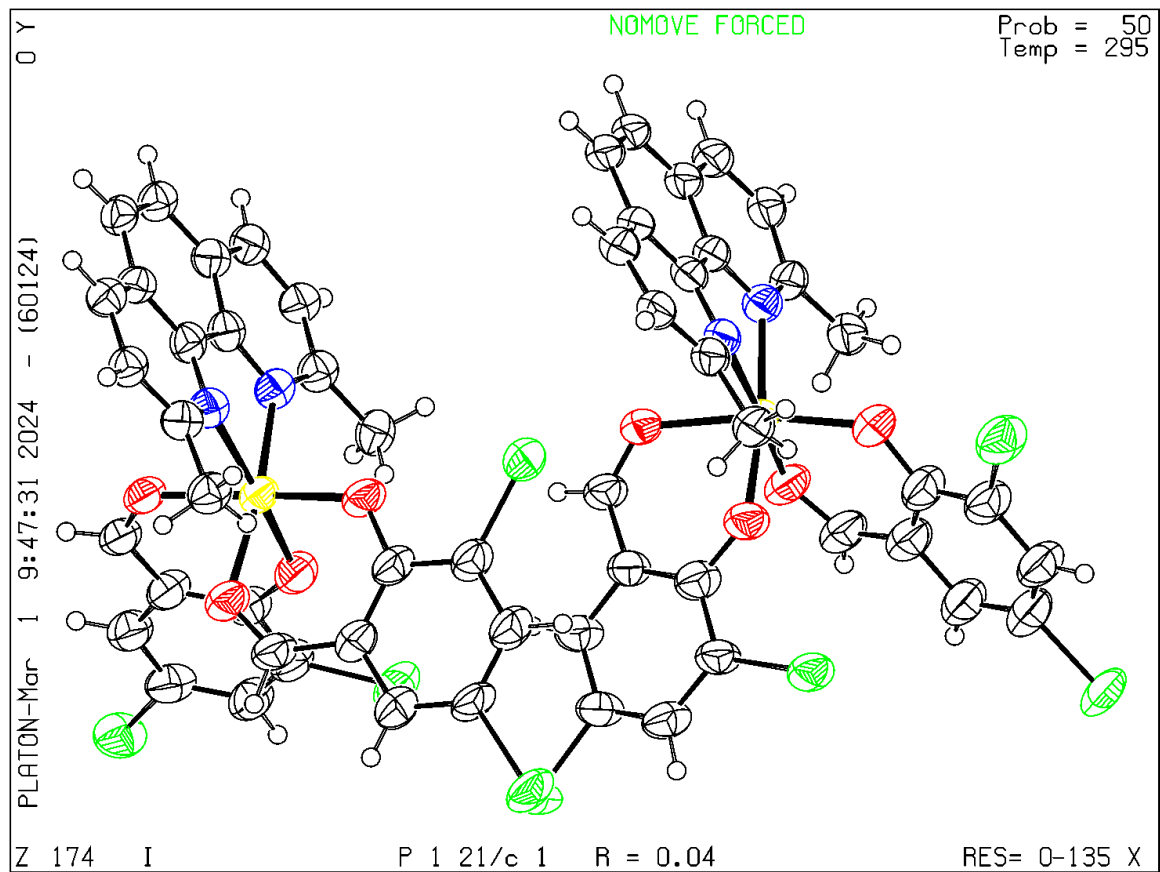

Supplement: s1 [file s1]
