# Supplementary material
Source: MDPI journal article supplement (https://www.mdpi.com/2304-6740/12/5/138)
Supplement: s1 [file s1]

Archive with 3 entries (3 files):
- Checkcif of compound 1.pdf
- Cif of compound 1.cif
- inorganics-2994113, ESI.pdf
