# Supplementary material
Source: MDPI journal article supplement (https://www.mdpi.com/2304-6740/12/5/138)
Supplement: s1 [file s1 › Cif of compound 1.cif]

data_global 
_audit_creation_date        "2024-03-01"
_audit_creation_method CRYSTALS_ver_14.61_build_6236 

_oxford_structure_analysis_title  'profin in P2(1)/c'
_chemical_name_systematic         ?
_chemical_melting_point           ?

#looking for refcif 
 
 
# Check this file using the IUCr facility at: 
# http://checkcif.iucr.org/ 
 
# The content below is held in the file 'script/refcif.dat'. This is a text 
# file which you may edit to reflect local conditions. 
# Items which need looking at are represented by a '?'. 
# Items for which there are choices are prefixed with 'choose from'. 
 
_publ_contact_letter 
; 
 Please consider this CIF submission for 
 publication as a Short Format Paper in Acta 
 Crystallographica E. 
; 
_publ_contact_author_name         'Anthony Other' 
_publ_contact_author_address 
; 
 Chemical Crystallography Laboratory, 
 Department of Chemistry, 
 University of Nowhere, 
 Nowhere, NO1 4T, UK. 
; 
 
_publ_contact_author_phone        '+44 1865 000000' 
_publ_contact_author_fax          '+44 1865 000000' 
_publ_contact_author_email        'a.n.other@chem.no.ac.uk' 
_publ_requested_journal           'Section E' 
_publ_requested_category          EO # choose from: FI FM FO CI CM CO AD 
_publ_requested_coeditor_name     'Prof William Clegg' 
 
_publ_section_title 
# Title of paper - generally just the systematic or trivial name 
; ? 
; 
 
# The loop structure below should contain the names and addresses of all 
# authors, in the required order of publication. Repeat as necessary. 
loop_ 
 _publ_author_name 
 _publ_author_address 
 _publ_author_footnote 
 'Other, Anthony N.' # Author 1 
; 
 ? # Address for author 1 
; 
; 
 ? # Footnote for author 1 
; 
 'Else, S. O.' # Author 2 
; 
 ? # Address 2 
; 
; 
 ? # Footnote 2 
; 
 
 
_publ_section_abstract 
# Text of the abstract 
# (a) The Abstract must be self-contained and comprehensible 
# without the rest of the paper. This means no references 
# to atom names or to compound numbers; compounds must be 
# identified as the title compound, or by name or by some other 
# means such as derivatives of each other (e.g. "the 
# corresponding ketone"). 
# (b) The chemical formula of "the title compound" must be given. 
# (c) Any crystallographic molecular symmetry should be 
# mentioned, and also the presence of more than one molecule 
# in the asymmetric unit (i.e. anything other than Z'=1). 
; 
? 
; 
 
_publ_section_related_literature  # Not in version 2.3.1 
############################################################### 
# Essential references (e.g. to the origin of the material studied, related 
# structural studies, and to information supporting the reported structure) 
# should be cited in this section, with appropriate very brief explanatory 
# text, for example `The synthesis of the complex is described by Jones 
# (2001). The anhydrous complex has essentially the same coordination 
# geometry (Smith, 2003).' In addition, all references included in the 
# supplementary materials, but not elsewhere in the published article, 
# should be given here. The simple text `For related literature, see:...' 
# may be used, but further details should be provided in the Comment 
# section, which forms part of the supplementary material. 
############################################################### 
; 
? 
; 
 
_publ_section_comment 
# Text of the paper 
# Note that atoms are referenced as N2, not N(2) or N~2~ 
# If text containing () occur within (), the outer ones should be [] 
# Figures should be referenced as Fig. 
; 
? 
; 
_publ_section_acknowledgements    # Acknowledgments 
; 
? 
; 
_publ_section_figure_captions 
# Captions to figures - Start each caption on a new line after a blank line 
; 
Fig. 1. 
The title compound with displacement ellipsoids drawn at the 50% 
probability level. H atoms are shown as spheres of 
arbitary radius. 
 
; 
 
 
_publ_section_exptl_refinement 
# Some potentially useful phrases are donated by Bill Clegg: 
; 
In the absence of significant anomalous scattering, Friedel pairs were 
merged. 
 
The absolute configuration was arbitrarily assigned. 
 
The relatively large ratio of minimum to maximum corrections applied 
in the multiscan process (1:nnn) reflect changes in the illuminated 
volume of the crystal. 
 
Changes in illuminated volume were kept to a minimum, and were 
taken into account (G\"orbitz, 1999) by the multi-scan inter-frame 
scaling (DENZO/SCALEPACK, Otwinowski & Minor, 1997). 
 
 
G\"orbitz, C. H. (1999). Acta Cryst. B55, 1090-1098. 
 
 
 
 
The H atoms were all located in a difference map, but those 
attached to carbon atoms were repositioned geometrically. 
The H atoms were initially refined with soft restraints on the 
bond lengths and angles to regularise their geometry 
(C---H in the range 0.93--0.98, 
N---H in the range 0.86--0.89 
N---H to 0.86 
O---H = 0.82 
\%A) 
and 
U~iso~(H) (in the range 1.2-1.5 times U~eq~ of the parent atom), 
after which the positions were refined with riding constraints 
(Cooper et al, 2010). 
 
Cooper, R. I., Thompson, A. L. & Watkin, D. J. (2010). J. Appl. Cryst. 
43, 1100-1107. 
 
; 
 
_publ_section_exptl_prep 
# Brief details or a reference. Include solvent if known 
; 
? 
; 
 
# Hand-made tables can be put in the cif. The number of columns 
# is set in the loop header. 
# The contants of each column can either be a piece of text 
# without any spaces (eg a number) or other text enclosed in " " 
# Remove the leading # in the following example 
 
#_geom_extra_table_head_A 
#; 
#Table 2. 
#Molecular parameters deviating most from MOGUL averages 
#; 
# 
#loop_ 
#_geom_extra_tableA_col_1 
#_geom_extra_tableA_col_2 
#_geom_extra_tableA_col_3 
#_geom_extra_tableA_col_4 
# 
#Parameter "Observed Value" "MOGUL Value" "MOGUL e.s.d" 
#N5-C6-C4 129 124 "7 (\%)" 
#C3-O10-C2 105 109 "2 (\%)" 
#C6-O7 1.25 1.22 ".02 (\%A)" 
# 
 
data_I 
 
_exptl_special_details 
; 
 The crystal was 
placed in the cold stream of an Oxford 
Cryosystems open-flow nitrogen cryostat (Cosier & 
Glazer, 1986) with a nominal stability of 0.1K. 
 
Cosier, J. & Glazer, A.M., 1986. J. Appl. Cryst. 105-107. 
; 
_refine_special_details 
; 
? 
; 
#--------------------------------------------------------------- 
# _oxford_ data items, April 2010: 
# There is some uncertainty about the correct way of forming local data 
# names, e.g. 
 
# _atom_site_special_shape_oxford 
# or 
# _oxford_atom_site_special_shape 
 
# see: 
# http://www.iucr.org/resources/cif/spec/version1.1/semantics#namespace 
 
# A reserved prefix, e.g. foo, must be used in the following way 
# " If the data file contains items defined in a DDL1 dictionary, the 
# local data names assigned under the reserved prefix must contain it as 
# their first component, e.g. _foo_atom_site_my_item. " 
 
# However, this seems to say the opposite: 
# http://www.iucr.org/__data/iucr/cif/standard/cifstd8.html 
 
# According to advice from the IUCr, CRYSTALS is correct 
#--------------------------------------------------------------- 
# End of 'script/refcif.dat' 
#end of refcif 
_cell_length_a                    16.604(8)
_cell_length_b                    24.002(13)
_cell_length_c                    14.571(8)
_cell_angle_alpha                 90
_cell_angle_beta                  103.381(12)
_cell_angle_gamma                 90
_cell_volume                      5649(5)
 
_symmetry_cell_setting            'monoclinic' 
_symmetry_space_group_name_H-M    'P 1 21/c 1 ' 
_symmetry_space_group_name_Hall   ? 
loop_
 _symmetry_equiv_pos_as_xyz
 'x,y,z'
 '-x,-y,-z'
 '-x,y+1/2,-z+1/2'
 'x,-y+1/2,z+1/2'

loop_
_atom_type_symbol
_atom_type_scat_dispersion_real
_atom_type_scat_dispersion_imag
_atom_type_scat_Cromer_Mann_a1
_atom_type_scat_Cromer_Mann_b1
_atom_type_scat_Cromer_Mann_a2
_atom_type_scat_Cromer_Mann_b2
_atom_type_scat_Cromer_Mann_a3
_atom_type_scat_Cromer_Mann_b3
_atom_type_scat_Cromer_Mann_a4
_atom_type_scat_Cromer_Mann_b4
_atom_type_scat_Cromer_Mann_c
_atom_type_scat_source  
 C       0.0033   0.0016   2.3100  20.8439   1.0200  10.2075   1.5886   0.5687
   0.8650  51.6512   0.2156 'International Tables Vol C 4.2.6.8 and 6.1.1.4'
 H       0.0000   0.0000   0.4930  10.5109   0.3229  26.1257   0.1402   3.1424
   0.0408  57.7998   0.0030 'International Tables Vol C 4.2.6.8 and 6.1.1.4'
 N       0.0061   0.0033  12.2126   0.0057   3.1322   9.8933   2.0125  28.9975
   1.1663   0.5826 -11.5290 'International Tables Vol C 4.2.6.8 and 6.1.1.4'
 O       0.0106   0.0060   3.0485  13.2771   2.2868   5.7011   1.5463   0.3239
   0.8670  32.9089   0.2508 'International Tables Vol C 4.2.6.8 and 6.1.1.4'
 Mn      0.3368   0.7283  11.2819   5.3409   7.3573   0.3432   3.0193  17.8674
   2.2441  83.7543   1.0896 'International Tables Vol C 4.2.6.8 and 6.1.1.4'
 Br     -0.2901   2.4595  17.1789   2.1723   5.2358  16.5796   5.6377   0.2609
   3.9851  41.4328   2.9557 'International Tables Vol C 4.2.6.8 and 6.1.1.4'
 Cl      0.1484   0.1585  11.4604   0.0104   7.1964   1.1662   6.2556  18.5194
   1.6455  47.7784  -9.5574 'International Tables Vol C 4.2.6.8 and 6.1.1.4'
 F       0.0171   0.0103   3.5392  10.2825   2.6412   4.2944   1.5170   0.2615
   1.0243  26.1476   0.2776 'International Tables Vol C 4.2.6.8 and 6.1.1.4'
 Ni      0.3393   1.1124  12.8376   3.8785   7.2920   0.2565   4.4438  12.1763
   2.3800  66.3421   1.0341 'International Tables Vol C 4.2.6.8 and 6.1.1.4'
 
 
_cell_formula_units_Z                    8

# Given Formula = C26.25 H26.25 Br0.25 Cl0.38 F0.25 Mn2.62 N5.25 Ni0.25 O5.25 
# Dc =      1.64 Fooo =   2820.00 Mu =     17.60 M =    696.16
# Found Formula = C28 H18 Br4 N2 Ni1 O4 
# Dc =      1.94 FOOO =   3200.00 Mu =     63.83 M =    824.79

_chemical_formula_sum             'C28 H18 Br4 N2 Ni1 O4'
_chemical_formula_moiety          'C28 H18 Br4 N2 Ni1 O4'
_chemical_compound_source                ?
_chemical_formula_weight            824.79
 
 
_cell_measurement_reflns_used          168
_cell_measurement_theta_min             10
_cell_measurement_theta_max             20
_cell_measurement_temperature          295
 
_exptl_crystal_description        'prism' 
_exptl_crystal_colour             'green' 
_exptl_crystal_size_min           0.110 
_exptl_crystal_size_mid           0.120 
_exptl_crystal_size_max           0.150 
 
_exptl_crystal_density_diffrn     1.939 
_exptl_crystal_density_meas       ? 
_exptl_crystal_density_method     'not measured' 
# Non-dispersive F(000): 
_exptl_crystal_F_000              3200 
_exptl_absorpt_coefficient_mu     6.383 
 
# Sheldrick geometric approximatio 0.46 0.50 
_exptl_absorpt_correction_type    numerical 
_exptl_absorpt_process_details 
; 
 Analytical Absorption (De Meulenaer & Tompa, 1965) 
; 
_exptl_absorpt_correction_T_min   0.46 
_exptl_absorpt_correction_T_max   0.50 
_diffrn_measurement_device_type   'Bruker Kappa Apex2' 
_diffrn_measurement_device        'Area' 
_diffrn_radiation_monochromator   'graphite' 
_diffrn_radiation_type            'Mo K\a'
_diffrn_radiation_wavelength           0.71073
_diffrn_measurement_method        '\f & \w scans' 
 
# If a reference occurs more than once, delete the author 
# and date from subsequent references. 
_computing_data_collection        'Apex2 (Bruker AXS, 2006)' 
_computing_cell_refinement        'Apex2 (Bruker AXS, 2006)' 
_computing_data_reduction         'Apex2 (Bruker AXS, 2006)' 
_computing_structure_solution     'Superflip (Palatinus & Chapuis, 2007)' 
_computing_structure_refinement   'CRYSTALS (Betteridge et al., 2003)' 
_computing_publication_material   'CRYSTALS (Betteridge et al., 2003)' 
_computing_molecular_graphics     'CAMERON (Watkin et al., 1996)' 
 
_diffrn_standards_interval_time   . 
_diffrn_standards_interval_count  . 
_diffrn_standards_number          0 
_diffrn_standards_decay_%         ? 
 
_diffrn_ambient_temperature        295
_diffrn_reflns_number             58802 
_reflns_number_total              10738 
_diffrn_reflns_av_R_equivalents   0.042 
# Number of reflections without Friedels Law is 0 
# Number of reflections with Friedels Law is 10738 
# Theoretical number of reflections is about 21782 
 
 
_diffrn_reflns_theta_min          1.520 
_diffrn_reflns_theta_max          25.820 
_diffrn_measured_fraction_theta_max 0.986 
 
_diffrn_reflns_theta_full         25.045 
_diffrn_measured_fraction_theta_full 0.995 
 
 
_diffrn_reflns_limit_h_min        -15 
_diffrn_reflns_limit_h_max        20 
_diffrn_reflns_limit_k_min        -28 
_diffrn_reflns_limit_k_max        29 
_diffrn_reflns_limit_l_min        -17 
_diffrn_reflns_limit_l_max        17 
_reflns_limit_h_min               -20 
_reflns_limit_h_max               19 
_reflns_limit_k_min               0 
_reflns_limit_k_max               29 
_reflns_limit_l_min               0 
_reflns_limit_l_max               17 
 
_oxford_diffrn_Wilson_B_factor    3.62 
_oxford_diffrn_Wilson_scale       285.01 
 
_atom_sites_solution_primary      Other  #heavy,direct,difmap,geom,iterative
# _atom_sites_solution_secondary  difmap
_atom_sites_solution_hydrogens    difmap
 
_refine_diff_density_min          -0.98 
_refine_diff_density_max          0.49 
 
 
# The current dictionary definitions do not cover the 
# situation where the reflections used for refinement were 
# selected by a user-defined sigma threshold 
 
 
# The values actually used during refinement 
_oxford_reflns_threshold_expression_ref     I>2.0\s(I)
_refine_ls_number_reflns          7018 
_refine_ls_number_restraints      0 
_refine_ls_number_parameters      703 
_oxford_refine_ls_R_factor_ref    0.0381 
_refine_ls_wR_factor_ref          0.0854 
_refine_ls_goodness_of_fit_ref    0.9997 
_refine_ls_shift/su_max           0.0009213 
_refine_ls_shift/su_mean          0.0000376 
 
 
# The values computed with all filters except I/sigma 
_oxford_reflns_number_all         10723 
_refine_ls_R_factor_all           0.0829 
_refine_ls_wR_factor_all          0.1187 
 
# The values computed with a 2 sigma cutoff - a la SHELX 
_reflns_threshold_expression      I>2.0\s(I)
_reflns_number_gt                 7018 
_refine_ls_R_factor_gt            0.0381 
_refine_ls_wR_factor_gt           0.0854 
 
# choose from: rm (reference molecule of known chirality), 
# ad (anomolous dispersion - Flack), rmad (rm and ad), 
# syn (from synthesis), unk (unknown) or . (not applicable). 
_chemical_absolute_configuration  '.' 
 
 
_refine_ls_structure_factor_coef  Fsqd 
_refine_ls_matrix_type            full
_refine_ls_hydrogen_treatment     constr         #undef, noref, refall,
                                                 # refxyz, refU, constr or mixed
_refine_ls_weighting_scheme       calc 
_refine_ls_weighting_details 
;
 Method, part 1, Chebychev polynomial, (Watkin, 1994, Prince, 1982) 
 [weight] = 1.0/[A~0~*T~0~(x)+A~1~*T~1~(x) ... +A~n-1~]*T~n-1~(x)] 
 where A~i~ are the Chebychev coefficients listed below and x= Fcalc/Fmax 
 Method = Robust Weighting (Prince, 1982) 
 W = [weight] * [1-(deltaF/6*sigmaF)^2^]^2^ 
 A~i~ are: 
 2.47 3.17 0.955 
;
# Insert your own references if required - in alphabetical order 
_publ_section_references 
; 
Betteridge, P.W., Carruthers, J.R., Cooper, R.I., 
Prout, K. & Watkin, D.J. (2003). J. Appl. Cryst. 36, 1487. 
 
Bruker Analytical X-ray Systems, Inc., 2006. <i>Apex2</i>, 
Version 2 User Manual, M86-E01078, Madison, WI. 
 
De Meulenaer, J. & Tompa, H. (1965). Acta Cryst. 19, 1014. 
 
Palatinus, L. & Chapuis, G. (2007). J. Appl. Cryst. 40, 786-790. 
 
Prince, E. 
Mathematical Techniques in Crystallography 
and Materials Science 
Springer-Verlag, New York, 1982. 
 
Watkin D.J. (1994). 
Acta Cryst, A50, 411-437. 
 
Watkin, D.J., Prout, C.K. & Pearce, L.J. (1996). CAMERON, Chemical 
Crystallography Laboratory, Oxford, UK. 
; 

# Uequiv = arithmetic mean of Ui i.e. Ueqiv = (U1+U2+U3)/3

# Replace last . with number of unfound hydrogen atoms attached to an atom.

# ..._refinement_flags_... 
# . no refinement constraints           S special position constraint on site
# G rigid group refinement of site      R riding atom
# D distance or angle restraint on site T thermal displacement constraints
# U Uiso or Uij restraint (rigid bond)  P partial occupancy constraint


loop_
_atom_site_label
_atom_site_type_symbol
_atom_site_fract_x
_atom_site_fract_y
_atom_site_fract_z
_atom_site_U_iso_or_equiv
_atom_site_occupancy
_atom_site_adp_type
_atom_site_refinement_flags_posn
_atom_site_refinement_flags_adp
_atom_site_refinement_flags_occupancy
_atom_site_disorder_assembly
_atom_site_disorder_group
_atom_site_attached_hydrogens
Ni1 Ni 0.52821(4) 0.89637(3) 0.80943(5) 0.0428 1.0000 Uani . . . . . . 
Ni2 Ni 1.03305(5) 0.89633(3) 0.77360(5) 0.0448 1.0000 Uani . . . . . . 
O1 O 0.6563(2) 0.87996(17) 0.8421(3) 0.0475 1.0000 Uani . . . . . . 
O2 O 0.5278(3) 0.87487(19) 0.6754(3) 0.0555 1.0000 Uani . . . . . . 
O3 O 0.5149(3) 0.81122(19) 0.8347(3) 0.0602 1.0000 Uani . . . . . . 
O4 O 0.4079(3) 0.90043(19) 0.7662(3) 0.0598 1.0000 Uani . . . . . . 
O5 O 1.1580(2) 0.87687(16) 0.8266(3) 0.0490 1.0000 Uani . . . . . . 
O6 O 1.0048(3) 0.81402(18) 0.7763(3) 0.0563 1.0000 Uani . . . . . . 
O7 O 1.0503(3) 0.87319(18) 0.6434(3) 0.0557 1.0000 Uani . . . . . . 
O8 O 0.9155(2) 0.91976(18) 0.7096(3) 0.0531 1.0000 Uani . . . . . . 
N1 N 0.5432(3) 0.9226(2) 0.9509(3) 0.0474 1.0000 Uani . . . . . . 
N2 N 0.5568(3) 0.9836(2) 0.7996(3) 0.0472 1.0000 Uani . . . . . . 
N3 N 1.0757(3) 0.9805(2) 0.7851(3) 0.0453 1.0000 Uani . . . . . . 
N4 N 1.0337(3) 0.9144(2) 0.9150(3) 0.0438 1.0000 Uani . . . . . . 
C1 C 0.6898(4) 0.8481(3) 0.7947(4) 0.0520 1.0000 Uani . . . . . . 
C2 C 0.6558(4) 0.8263(3) 0.7008(4) 0.0496 1.0000 Uani . . . . . . 
C3 C 0.5775(4) 0.8395(3) 0.6460(5) 0.0552 1.0000 Uani . . . . . . 
C4 C 0.5473(4) 0.8161(3) 0.5552(4) 0.0522 1.0000 Uani . . . . . . 
C5 C 0.5994(4) 0.7789(3) 0.5232(4) 0.0562 1.0000 Uani . . . . . . 
C6 C 0.6764(4) 0.7634(3) 0.5796(4) 0.0545 1.0000 Uani . . . . . . 
C7 C 0.7062(4) 0.7880(3) 0.6671(4) 0.0550 1.0000 Uani . . . . . . 
C8 C 0.4561(4) 0.7825(3) 0.7946(5) 0.0642 1.0000 Uani . . . . . . 
C9 C 0.3799(4) 0.8010(3) 0.7390(5) 0.0619 1.0000 Uani . . . . . . 
C10 C 0.3572(4) 0.8578(3) 0.7254(5) 0.0627 1.0000 Uani . . . . . . 
C11 C 0.2824(4) 0.8725(3) 0.6657(5) 0.0641 1.0000 Uani . . . . . . 
C12 C 0.2280(5) 0.8305(3) 0.6241(5) 0.0712 1.0000 Uani . . . . . . 
C13 C 0.2479(4) 0.7740(3) 0.6415(5) 0.0677 1.0000 Uani . . . . . . 
C14 C 0.3236(4) 0.7585(3) 0.6968(5) 0.0687 1.0000 Uani . . . . . . 
C15 C 0.4735(4) 0.8463(3) 1.0128(4) 0.0529 1.0000 Uani . . . . . . 
C16 C 0.5297(4) 0.8958(3) 1.0293(4) 0.0492 1.0000 Uani . . . . . . 
C17 C 0.5625(4) 0.9147(3) 1.1207(5) 0.0512 1.0000 Uani . . . . . . 
C18 C 0.6135(4) 0.9615(3) 1.1350(4) 0.0529 1.0000 Uani . . . . . . 
C19 C 0.6292(4) 0.9892(3) 1.0563(4) 0.0485 1.0000 Uani . . . . . . 
C20 C 0.6786(4) 1.0373(3) 1.0660(4) 0.0474 1.0000 Uani . . . . . . 
C21 C 0.6914(4) 1.0660(3) 0.9887(4) 0.0503 1.0000 Uani . . . . . . 
C22 C 0.6505(3) 1.0464(3) 0.8988(4) 0.0468 1.0000 Uani . . . . . . 
C23 C 0.6529(4) 1.0756(3) 0.8162(4) 0.0521 1.0000 Uani . . . . . . 
C24 C 0.6054(4) 1.0614(3) 0.7279(4) 0.0499 1.0000 Uani . . . . . . 
C25 C 0.5551(4) 1.0137(3) 0.7203(4) 0.0491 1.0000 Uani . . . . . . 
C26 C 0.5009(4) 0.9950(3) 0.6286(4) 0.0545 1.0000 Uani . . . . . . 
C27 C 0.5915(3) 0.9682(3) 0.9664(4) 0.0474 1.0000 Uani . . . . . . 
C28 C 0.6001(3) 0.9988(3) 0.8856(4) 0.0465 1.0000 Uani . . . . . . 
C29 C 1.1899(4) 0.8301(3) 0.8413(4) 0.0511 1.0000 Uani . . . . . . 
C30 C 1.1456(4) 0.7781(3) 0.8319(5) 0.0537 1.0000 Uani . . . . . . 
C31 C 1.0597(4) 0.7722(3) 0.8000(4) 0.0524 1.0000 Uani . . . . . . 
C32 C 1.0228(4) 0.7184(3) 0.7928(5) 0.0579 1.0000 Uani . . . . . . 
C33 C 1.0719(4) 0.6710(3) 0.8161(5) 0.0607 1.0000 Uani . . . . . . 
C34 C 1.1569(5) 0.6768(3) 0.8470(5) 0.0611 1.0000 Uani . . . . . . 
C35 C 1.1931(4) 0.7293(3) 0.8537(5) 0.0596 1.0000 Uani . . . . . . 
C36 C 0.9954(4) 0.8583(3) 0.5759(4) 0.0549 1.0000 Uani . . . . . . 
C37 C 0.9092(4) 0.8688(3) 0.5605(5) 0.0557 1.0000 Uani . . . . . . 
C38 C 0.8762(4) 0.9015(3) 0.6234(4) 0.0530 1.0000 Uani . . . . . . 
C39 C 0.7912(4) 0.9148(3) 0.5954(4) 0.0538 1.0000 Uani . . . . . . 
C40 C 0.7427(4) 0.8943(3) 0.5106(4) 0.0594 1.0000 Uani . . . . . . 
C41 C 0.7765(4) 0.8616(3) 0.4509(4) 0.0570 1.0000 Uani . . . . . . 
C42 C 0.8596(4) 0.8485(3) 0.4770(5) 0.0593 1.0000 Uani . . . . . . 
C43 C 1.0503(4) 0.9993(3) 0.6133(4) 0.0518 1.0000 Uani . . . . . . 
C44 C 1.0901(4) 1.0130(2) 0.7149(4) 0.0457 1.0000 Uani . . . . . . 
C45 C 1.1424(4) 1.0591(2) 0.7366(4) 0.0477 1.0000 Uani . . . . . . 
C46 C 1.1753(4) 1.0736(2) 0.8303(4) 0.0448 1.0000 Uani . . . . . . 
C47 C 1.1582(3) 1.0399(2) 0.9020(4) 0.0436 1.0000 Uani . . . . . . 
C48 C 1.1866(3) 1.0530(2) 0.9979(4) 0.0463 1.0000 Uani . . . . . . 
C49 C 1.1605(3) 1.0219(2) 1.0657(4) 0.0459 1.0000 Uani . . . . . . 
C50 C 1.1081(3) 0.9755(2) 1.0395(4) 0.0438 1.0000 Uani . . . . . . 
C51 C 1.0816(4) 0.9438(3) 1.1082(4) 0.0481 1.0000 Uani . . . . . . 
C52 C 1.0319(4) 0.8986(2) 1.0783(4) 0.0461 1.0000 Uani . . . . . . 
C53 C 1.0017(4) 0.8877(3) 0.9807(4) 0.0484 1.0000 Uani . . . . . . 
C54 C 0.9450(4) 0.8391(3) 0.9503(4) 0.0500 1.0000 Uani . . . . . . 
C55 C 1.1074(3) 0.9932(2) 0.8754(4) 0.0434 1.0000 Uani . . . . . . 
C56 C 1.0814(3) 0.9595(2) 0.9435(4) 0.0443 1.0000 Uani . . . . . . 
Br1 Br 0.44237(4) 0.83239(3) 0.48585(5) 0.0604 1.0000 Uani . . . . . . 
Br2 Br 0.74130(5) 0.71221(3) 0.53247(5) 0.0640 1.0000 Uani . . . . . . 
Br3 Br 0.25669(5) 0.94774(4) 0.64019(6) 0.0759 1.0000 Uani . . . . . . 
Br4 Br 0.17207(5) 0.71853(3) 0.58916(5) 0.0715 1.0000 Uani . . . . . . 
Br5 Br 0.90988(4) 0.71147(3) 0.74226(6) 0.0722 1.0000 Uani . . . . . . 
Br6 Br 1.21983(5) 0.61233(3) 0.87874(6) 0.0692 1.0000 Uani . . . . . . 
Br7 Br 0.74232(4) 0.96401(3) 0.66914(4) 0.0564 1.0000 Uani . . . . . . 
Br8 Br 0.70701(4) 0.83518(3) 0.33840(5) 0.0665 1.0000 Uani . . . . . . 
H11 H 0.7433 0.8368 0.8224 0.0619 1.0000 Uiso R . . . . . 
H51 H 0.5830 0.7638 0.4635 0.0669 1.0000 Uiso R . . . . . 
H71 H 0.7590 0.7797 0.7018 0.0659 1.0000 Uiso R . . . . . 
H81 H 0.4605 0.7454 0.8035 0.0767 1.0000 Uiso R . . . . . 
H121 H 0.1771 0.8402 0.5844 0.0847 1.0000 Uiso R . . . . . 
H141 H 0.3383 0.7208 0.7058 0.0819 1.0000 Uiso R . . . . . 
H151 H 0.4225 0.8563 0.9700 0.0792 1.0000 Uiso R . . . . . 
H152 H 0.4998 0.8168 0.9871 0.0793 1.0000 Uiso R . . . . . 
H153 H 0.4634 0.8349 1.0718 0.0790 1.0000 Uiso R . . . . . 
H171 H 0.5514 0.8960 1.1726 0.0611 1.0000 Uiso R . . . . . 
H181 H 0.6369 0.9743 1.1959 0.0630 1.0000 Uiso R . . . . . 
H201 H 0.7032 1.0501 1.1266 0.0571 1.0000 Uiso R . . . . . 
H211 H 0.7254 1.0981 0.9944 0.0609 1.0000 Uiso R . . . . . 
H231 H 0.6880 1.1064 0.8209 0.0619 1.0000 Uiso R . . . . . 
H241 H 0.6074 1.0831 0.6761 0.0597 1.0000 Uiso R . . . . . 
H261 H 0.5329 0.9868 0.5832 0.0819 1.0000 Uiso R . . . . . 
H262 H 0.4719 0.9625 0.6395 0.0818 1.0000 Uiso R . . . . . 
H263 H 0.4622 1.0237 0.6038 0.0820 1.0000 Uiso R . . . . . 
H291 H 1.2479 0.8283 0.8627 0.0618 1.0000 Uiso R . . . . . 
H331 H 1.0483 0.6357 0.8114 0.0729 1.0000 Uiso R . . . . . 
H351 H 1.2503 0.7324 0.8746 0.0709 1.0000 Uiso R . . . . . 
H361 H 1.0121 0.8371 0.5293 0.0660 1.0000 Uiso R . . . . . 
H401 H 0.6869 0.9030 0.4936 0.0708 1.0000 Uiso R . . . . . 
H421 H 0.8826 0.8263 0.4375 0.0710 1.0000 Uiso R . . . . . 
H431 H 1.0155 0.9671 0.6108 0.0769 1.0000 Uiso R . . . . . 
H432 H 1.0194 1.0309 0.5849 0.0768 1.0000 Uiso R . . . . . 
H433 H 1.0941 0.9918 0.5819 0.0770 1.0000 Uiso R . . . . . 
H451 H 1.1548 1.0802 0.6881 0.0570 1.0000 Uiso R . . . . . 
H461 H 1.2084 1.1048 0.8455 0.0538 1.0000 Uiso R . . . . . 
H481 H 1.2230 1.0820 1.0160 0.0555 1.0000 Uiso R . . . . . 
H491 H 1.1780 1.0317 1.1282 0.0548 1.0000 Uiso R . . . . . 
H511 H 1.0982 0.9526 1.1716 0.0579 1.0000 Uiso R . . . . . 
H521 H 1.0167 0.8751 1.1220 0.0552 1.0000 Uiso R . . . . . 
H541 H 0.9271 0.8373 0.8832 0.0750 1.0000 Uiso R . . . . . 
H542 H 0.8977 0.8431 0.9771 0.0748 1.0000 Uiso R . . . . . 
H543 H 0.9738 0.8059 0.9740 0.0749 1.0000 Uiso R . . . . . 
loop_
_atom_site_aniso_label
_atom_site_aniso_U_11
_atom_site_aniso_U_22
_atom_site_aniso_U_33
_atom_site_aniso_U_23
_atom_site_aniso_U_13
_atom_site_aniso_U_12
Ni1 0.0390(4) 0.0565(4) 0.0330(4) -0.0119(3) 0.0084(3) -0.0029(3) 
Ni2 0.0430(4) 0.0466(4) 0.0416(4) -0.0062(3) 0.0031(3) -0.0039(3) 
O1 0.049(2) 0.053(2) 0.039(2) -0.0099(18) 0.0055(18) -0.0009(19) 
O2 0.056(3) 0.063(3) 0.043(2) -0.013(2) 0.002(2) 0.006(2) 
O3 0.059(3) 0.062(3) 0.053(3) -0.014(2) 0.001(2) -0.014(2) 
O4 0.050(2) 0.068(3) 0.055(3) -0.013(2) 0.000(2) -0.007(2) 
O5 0.048(2) 0.042(2) 0.052(2) -0.0094(18) 0.0010(19) -0.0038(19) 
O6 0.051(2) 0.050(2) 0.063(3) -0.006(2) 0.004(2) -0.003(2) 
O7 0.052(2) 0.062(3) 0.047(2) -0.010(2) -0.002(2) -0.002(2) 
O8 0.050(2) 0.060(3) 0.042(2) -0.011(2) -0.0046(19) -0.001(2) 
N1 0.044(3) 0.053(3) 0.042(3) -0.005(2) 0.004(2) 0.004(2) 
N2 0.036(2) 0.060(3) 0.043(3) -0.009(2) 0.004(2) 0.006(2) 
N3 0.045(3) 0.044(3) 0.044(3) 0.002(2) 0.005(2) 0.003(2) 
N4 0.044(3) 0.043(3) 0.040(3) 0.005(2) 0.002(2) 0.003(2) 
C1 0.051(3) 0.057(4) 0.041(3) -0.012(3) -0.002(3) 0.006(3) 
C2 0.051(3) 0.049(4) 0.044(3) -0.010(3) 0.003(3) 0.008(3) 
C3 0.059(4) 0.053(4) 0.049(4) -0.007(3) 0.002(3) 0.003(3) 
C4 0.057(4) 0.057(4) 0.039(3) -0.013(3) 0.004(3) 0.006(3) 
C5 0.066(4) 0.051(4) 0.044(3) -0.009(3) -0.004(3) 0.003(3) 
C6 0.064(4) 0.050(4) 0.047(4) -0.013(3) 0.007(3) 0.008(3) 
C7 0.064(4) 0.051(4) 0.044(3) -0.009(3) 0.001(3) 0.010(3) 
C8 0.061(4) 0.071(5) 0.052(4) -0.013(3) -0.003(3) -0.013(4) 
C9 0.060(4) 0.068(5) 0.053(4) -0.009(3) 0.002(3) -0.013(3) 
C10 0.051(4) 0.075(5) 0.055(4) -0.009(4) -0.002(3) -0.011(3) 
C11 0.061(4) 0.080(5) 0.045(4) -0.009(3) -0.001(3) -0.010(4) 
C12 0.061(4) 0.083(6) 0.062(4) -0.016(4) -0.001(3) -0.019(4) 
C13 0.059(4) 0.080(5) 0.058(4) -0.006(4) 0.001(3) -0.024(4) 
C14 0.058(4) 0.079(5) 0.063(4) -0.011(4) 0.003(3) -0.020(4) 
C15 0.046(3) 0.063(4) 0.050(4) -0.005(3) 0.010(3) 0.003(3) 
C16 0.039(3) 0.055(4) 0.049(4) -0.008(3) 0.000(3) 0.004(3) 
C17 0.042(3) 0.058(4) 0.053(4) -0.004(3) 0.010(3) 0.006(3) 
C18 0.046(3) 0.065(4) 0.044(3) -0.010(3) 0.004(3) 0.008(3) 
C19 0.040(3) 0.060(4) 0.043(3) -0.012(3) 0.005(3) 0.007(3) 
C20 0.042(3) 0.058(4) 0.040(3) -0.012(3) 0.004(3) 0.004(3) 
C21 0.042(3) 0.056(4) 0.049(4) -0.015(3) 0.003(3) 0.006(3) 
C22 0.040(3) 0.054(4) 0.045(3) -0.015(3) 0.008(3) 0.004(3) 
C23 0.047(3) 0.056(4) 0.053(4) -0.011(3) 0.010(3) 0.005(3) 
C24 0.044(3) 0.062(4) 0.044(3) -0.008(3) 0.011(3) 0.003(3) 
C25 0.039(3) 0.060(4) 0.046(3) -0.010(3) 0.004(3) 0.008(3) 
C26 0.047(3) 0.065(4) 0.047(3) -0.008(3) 0.001(3) 0.005(3) 
C27 0.038(3) 0.058(4) 0.043(3) -0.012(3) 0.003(2) 0.007(3) 
C28 0.039(3) 0.056(4) 0.044(3) -0.011(3) 0.009(3) 0.009(3) 
C29 0.049(3) 0.045(4) 0.053(4) -0.011(3) 0.001(3) -0.001(3) 
C30 0.051(4) 0.045(4) 0.057(4) -0.007(3) -0.002(3) -0.003(3) 
C31 0.053(4) 0.048(4) 0.051(4) -0.007(3) 0.003(3) -0.002(3) 
C32 0.054(4) 0.043(4) 0.071(4) -0.007(3) 0.000(3) -0.001(3) 
C33 0.056(4) 0.049(4) 0.070(5) -0.009(3) 0.002(3) -0.005(3) 
C34 0.072(4) 0.048(4) 0.056(4) -0.009(3) 0.001(3) 0.004(3) 
C35 0.058(4) 0.051(4) 0.065(4) -0.011(3) 0.005(3) 0.000(3) 
C36 0.056(4) 0.055(4) 0.046(4) -0.012(3) -0.003(3) 0.001(3) 
C37 0.048(3) 0.064(4) 0.049(4) -0.008(3) -0.002(3) -0.005(3) 
C38 0.049(3) 0.058(4) 0.045(3) -0.008(3) -0.003(3) -0.007(3) 
C39 0.049(3) 0.066(4) 0.042(3) -0.004(3) 0.001(3) -0.007(3) 
C40 0.050(4) 0.074(5) 0.046(4) -0.006(3) -0.005(3) -0.006(3) 
C41 0.054(4) 0.075(4) 0.034(3) -0.014(3) -0.006(3) -0.013(3) 
C42 0.051(4) 0.071(5) 0.051(4) -0.010(3) 0.000(3) -0.007(3) 
C43 0.052(4) 0.049(4) 0.050(4) 0.000(3) 0.003(3) 0.002(3) 
C44 0.049(3) 0.045(3) 0.041(3) 0.003(3) 0.004(3) 0.007(3) 
C45 0.044(3) 0.046(3) 0.050(4) 0.000(3) 0.005(3) 0.002(3) 
C46 0.046(3) 0.039(3) 0.047(3) 0.001(3) 0.007(3) 0.002(3) 
C47 0.044(3) 0.045(3) 0.039(3) -0.002(3) 0.004(2) 0.006(3) 
C48 0.039(3) 0.041(3) 0.056(4) -0.003(3) 0.006(3) 0.001(2) 
C49 0.043(3) 0.045(3) 0.044(3) 0.001(3) 0.000(3) 0.004(3) 
C50 0.043(3) 0.044(3) 0.042(3) 0.002(3) 0.005(2) 0.007(3) 
C51 0.044(3) 0.054(4) 0.043(3) 0.001(3) 0.004(3) 0.008(3) 
C52 0.048(3) 0.045(3) 0.043(3) 0.003(3) 0.006(3) 0.002(3) 
C53 0.046(3) 0.048(3) 0.047(3) 0.002(3) 0.003(3) 0.003(3) 
C54 0.043(3) 0.050(3) 0.054(4) 0.008(3) 0.003(3) 0.002(3) 
C55 0.037(3) 0.045(3) 0.046(3) 0.003(3) 0.004(2) 0.006(2) 
C56 0.039(3) 0.046(3) 0.046(3) 0.003(3) 0.005(2) 0.006(3) 
Br1 0.0573(4) 0.0712(4) 0.0449(3) -0.0159(3) -0.0042(3) 0.0079(3) 
Br2 0.0789(5) 0.0577(4) 0.0498(4) -0.0179(3) 0.0031(3) 0.0190(4) 
Br3 0.0657(4) 0.0789(5) 0.0694(5) -0.0078(4) -0.0120(4) 0.0054(4) 
Br4 0.0605(4) 0.0873(5) 0.0598(4) -0.0144(4) 0.0002(3) -0.0371(4) 
Br5 0.0556(4) 0.0529(4) 0.0960(6) -0.0100(4) -0.0073(4) -0.0098(3) 
Br6 0.0761(5) 0.0502(4) 0.0742(5) -0.0029(3) 0.0030(4) 0.0180(3) 
Br7 0.0499(3) 0.0670(4) 0.0479(3) -0.0047(3) 0.0024(3) -0.0013(3) 
Br8 0.0593(4) 0.0848(5) 0.0443(3) -0.0150(3) -0.0108(3) -0.0153(4) 

_refine_ls_extinction_method 
    'None'
_oxford_refine_ls_scale 0.043742(4) 
loop_
 _geom_bond_atom_site_label_1
 _geom_bond_site_symmetry_1
 _geom_bond_atom_site_label_2
 _geom_bond_site_symmetry_2
 _geom_bond_distance
 _geom_bond_publ_flag
Ni1 . O1 . 2.106(4)    yes
Ni1 . O2 . 2.018(4)    yes
Ni1 . O3 . 2.097(5)    yes
Ni1 . O4 . 1.953(4)    yes
Ni1 . N1 . 2.115(5)    yes
Ni1 . N2 . 2.160(5)    yes
Ni2 . O5 . 2.092(4)    yes
Ni2 . O6 . 2.033(4)    yes
Ni2 . O7 . 2.060(4)    yes
Ni2 . O8 . 2.037(4)    yes
Ni2 . N3 . 2.134(5)    yes
Ni2 . N4 . 2.103(5)    yes
O1 . C1 . 1.244(7)    yes
O2 . C3 . 1.323(8)    yes
O3 . C8 . 1.227(7)    yes
O4 . C10 . 1.369(8)    yes
O5 . C29 . 1.239(7)    yes
O6 . C31 . 1.347(7)    yes
O7 . C36 . 1.229(7)    yes
O8 . C38 . 1.348(7)    yes
N1 . C16 . 1.375(8)    yes
N1 . C27 . 1.344(8)    yes
N2 . C25 . 1.357(8)    yes
N2 . C28 . 1.343(7)    yes
N3 . C44 . 1.351(7)    yes
N3 . C55 . 1.336(7)    yes
N4 . C53 . 1.359(8)    yes
N4 . C56 . 1.349(7)    yes
C1 . C2 . 1.452(8)    yes
C1 . H11 . 0.926    no
C2 . C3 . 1.395(9)    yes
C2 . C7 . 1.407(9)    yes
C3 . C4 . 1.417(8)    yes
C4 . C5 . 1.395(9)    yes
C4 . Br1 . 1.843(6)    yes
C5 . C6 . 1.401(9)    yes
C5 . H51 . 0.923    no
C6 . C7 . 1.387(8)    yes
C6 . Br2 . 1.867(6)    yes
C7 . H71 . 0.927    no
C8 . C9 . 1.407(10)    yes
C8 . H81 . 0.900    no
C9 . C10 . 1.416(10)    yes
C9 . C14 . 1.424(9)    yes
C10 . C11 . 1.387(9)    yes
C11 . C12 . 1.395(9)    yes
C11 . Br3 . 1.873(8)    yes
C12 . C13 . 1.405(11)    yes
C12 . H121 . 0.938    no
C13 . C14 . 1.377(10)    yes
C13 . Br4 . 1.870(7)    yes
C14 . H141 . 0.939    no
C15 . C16 . 1.496(9)    yes
C15 . H151 . 0.958    no
C15 . H152 . 0.953    no
C15 . H153 . 0.953    no
C16 . C17 . 1.392(8)    yes
C17 . C18 . 1.395(9)    yes
C17 . H171 . 0.933    no
C18 . C19 . 1.402(9)    yes
C18 . H181 . 0.934    no
C19 . C20 . 1.404(9)    yes
C19 . C27 . 1.407(8)    yes
C20 . C21 . 1.378(9)    yes
C20 . H201 . 0.936    no
C21 . C22 . 1.409(8)    yes
C21 . H211 . 0.948    no
C22 . C23 . 1.402(9)    yes
C22 . C28 . 1.400(9)    yes
C23 . C24 . 1.387(8)    yes
C23 . H231 . 0.934    no
C24 . C25 . 1.407(9)    yes
C24 . H241 . 0.923    no
C25 . C26 . 1.497(8)    yes
C26 . H261 . 0.959    no
C26 . H262 . 0.951    no
C26 . H263 . 0.953    no
C27 . C28 . 1.424(9)    yes
C29 . C30 . 1.438(9)    yes
C29 . H291 . 0.943    no
C30 . C31 . 1.401(9)    yes
C30 . C35 . 1.406(9)    yes
C31 . C32 . 1.423(9)    yes
C32 . C33 . 1.395(9)    yes
C32 . Br5 . 1.857(6)    yes
C33 . C34 . 1.386(10)    yes
C33 . H331 . 0.928    no
C34 . C35 . 1.391(9)    yes
C34 . Br6 . 1.864(7)    yes
C35 . H351 . 0.931    no
C36 . C37 . 1.419(9)    yes
C36 . H361 . 0.941    no
C37 . C38 . 1.410(9)    yes
C37 . C42 . 1.390(8)    yes
C38 . C39 . 1.412(9)    yes
C39 . C40 . 1.399(8)    yes
C39 . Br7 . 1.901(7)    yes
C40 . C41 . 1.383(9)    yes
C40 . H401 . 0.926    no
C41 . C42 . 1.379(9)    yes
C41 . Br8 . 1.883(5)    yes
C42 . H421 . 0.931    no
C43 . C44 . 1.511(8)    yes
C43 . H431 . 0.961    no
C43 . H432 . 0.954    no
C43 . H433 . 0.960    no
C44 . C45 . 1.397(8)    yes
C45 . C46 . 1.393(8)    yes
C45 . H451 . 0.929    no
C46 . C47 . 1.400(8)    yes
C46 . H461 . 0.926    no
C47 . C48 . 1.405(8)    yes
C47 . C55 . 1.401(8)    yes
C48 . C49 . 1.385(8)    yes
C48 . H481 . 0.918    no
C49 . C50 . 1.411(8)    yes
C49 . H491 . 0.920    no
C50 . C51 . 1.407(8)    yes
C50 . C56 . 1.418(8)    yes
C51 . C52 . 1.372(8)    yes
C51 . H511 . 0.924    no
C52 . C53 . 1.418(8)    yes
C52 . H521 . 0.928    no
C53 . C54 . 1.501(8)    yes
C54 . H541 . 0.955    no
C54 . H542 . 0.958    no
C54 . H543 . 0.952    no
C55 . C56 . 1.423(8)    yes
loop_
 _geom_angle_atom_site_label_1
 _geom_angle_site_symmetry_1
 _geom_angle_atom_site_label_2
 _geom_angle_site_symmetry_2
 _geom_angle_atom_site_label_3
 _geom_angle_site_symmetry_3
 _geom_angle
 _geom_angle_publ_flag
O1 . Ni1 . O2 . 86.99(16)    yes
O1 . Ni1 . O3 . 85.41(18)    yes
O2 . Ni1 . O3 . 86.79(19)    yes
O1 . Ni1 . O4 . 170.44(17)    yes
O2 . Ni1 . O4 . 85.80(18)    yes
O3 . Ni1 . O4 . 87.93(19)    yes
O1 . Ni1 . N1 . 87.16(17)    yes
O2 . Ni1 . N1 . 173.05(19)    yes
O3 . Ni1 . N1 . 96.48(19)    yes
O4 . Ni1 . N1 . 100.42(19)    yes
O1 . Ni1 . N2 . 88.30(17)    yes
O2 . Ni1 . N2 . 97.77(19)    yes
O3 . Ni1 . N2 . 172.04(17)    yes
O4 . Ni1 . N2 . 98.88(19)    yes
N1 . Ni1 . N2 . 78.3(2)    yes
O5 . Ni2 . O6 . 89.41(17)    yes
O5 . Ni2 . O7 . 86.70(16)    yes
O6 . Ni2 . O7 . 80.68(18)    yes
O5 . Ni2 . O8 . 173.40(18)    yes
O6 . Ni2 . O8 . 94.37(17)    yes
O7 . Ni2 . O8 . 88.58(17)    yes
O5 . Ni2 . N3 . 84.23(17)    yes
O6 . Ni2 . N3 . 172.78(17)    yes
O7 . Ni2 . N3 . 102.30(19)    yes
O8 . Ni2 . N3 . 92.29(18)    yes
O5 . Ni2 . N4 . 84.55(18)    yes
O6 . Ni2 . N4 . 97.50(19)    yes
O7 . Ni2 . N4 . 171.09(17)    yes
O8 . Ni2 . N4 . 100.27(18)    yes
N3 . Ni2 . N4 . 78.54(19)    yes
Ni1 . O1 . C1 . 123.2(4)    yes
Ni1 . O2 . C3 . 128.0(4)    yes
Ni1 . O3 . C8 . 124.6(5)    yes
Ni1 . O4 . C10 . 125.7(4)    yes
Ni2 . O5 . C29 . 127.8(4)    yes
Ni2 . O6 . C31 . 125.7(4)    yes
Ni2 . O7 . C36 . 125.5(4)    yes
Ni2 . O8 . C38 . 122.9(4)    yes
Ni1 . N1 . C16 . 131.7(4)    yes
Ni1 . N1 . C27 . 109.8(4)    yes
C16 . N1 . C27 . 116.6(5)    yes
Ni1 . N2 . C25 . 127.6(4)    yes
Ni1 . N2 . C28 . 106.3(4)    yes
C25 . N2 . C28 . 123.4(5)    yes
Ni2 . N3 . C44 . 127.0(4)    yes
Ni2 . N3 . C55 . 110.0(4)    yes
C44 . N3 . C55 . 121.0(5)    yes
Ni2 . N4 . C53 . 132.7(4)    yes
Ni2 . N4 . C56 . 109.7(4)    yes
C53 . N4 . C56 . 117.3(5)    yes
O1 . C1 . C2 . 128.1(6)    yes
O1 . C1 . H11 . 116.4    no
C2 . C1 . H11 . 115.4    no
C1 . C2 . C3 . 124.5(6)    yes
C1 . C2 . C7 . 115.6(5)    yes
C3 . C2 . C7 . 119.9(6)    yes
C2 . C3 . O2 . 121.9(6)    yes
C2 . C3 . C4 . 121.7(6)    yes
O2 . C3 . C4 . 116.4(6)    yes
C3 . C4 . C5 . 116.9(6)    yes
C3 . C4 . Br1 . 120.8(5)    yes
C5 . C4 . Br1 . 122.2(4)    yes
C4 . C5 . C6 . 121.7(6)    yes
C4 . C5 . H51 . 119.6    no
C6 . C5 . H51 . 118.6    no
C5 . C6 . C7 . 120.6(6)    yes
C5 . C6 . Br2 . 119.1(5)    yes
C7 . C6 . Br2 . 120.3(5)    yes
C2 . C7 . C6 . 119.0(6)    yes
C2 . C7 . H71 . 120.9    no
C6 . C7 . H71 . 120.1    no
O3 . C8 . C9 . 127.4(7)    yes
O3 . C8 . H81 . 117.2    no
C9 . C8 . H81 . 115.3    no
C8 . C9 . C10 . 124.0(6)    yes
C8 . C9 . C14 . 115.8(7)    yes
C10 . C9 . C14 . 120.2(7)    yes
C9 . C10 . O4 . 122.8(6)    yes
C9 . C10 . C11 . 120.2(6)    yes
O4 . C10 . C11 . 117.0(7)    yes
C10 . C11 . C12 . 119.0(7)    yes
C10 . C11 . Br3 . 120.0(5)    yes
C12 . C11 . Br3 . 121.0(6)    yes
C11 . C12 . C13 . 121.2(7)    yes
C11 . C12 . H121 . 119.3    no
C13 . C12 . H121 . 119.5    no
C12 . C13 . C14 . 120.7(7)    yes
C12 . C13 . Br4 . 120.4(5)    yes
C14 . C13 . Br4 . 118.9(6)    yes
C9 . C14 . C13 . 118.6(8)    yes
C9 . C14 . H141 . 120.5    no
C13 . C14 . H141 . 120.9    no
C16 . C15 . H151 . 109.2    no
C16 . C15 . H152 . 109.1    no
H151 . C15 . H152 . 110.3    no
C16 . C15 . H153 . 108.5    no
H151 . C15 . H153 . 110.3    no
H152 . C15 . H153 . 109.4    no
C15 . C16 . N1 . 117.1(5)    yes
C15 . C16 . C17 . 120.2(6)    yes
N1 . C16 . C17 . 122.7(6)    yes
C16 . C17 . C18 . 119.7(6)    yes
C16 . C17 . H171 . 120.8    no
C18 . C17 . H171 . 119.5    no
C17 . C18 . C19 . 118.8(6)    yes
C17 . C18 . H181 . 120.8    no
C19 . C18 . H181 . 120.5    no
C18 . C19 . C20 . 121.5(5)    yes
C18 . C19 . C27 . 117.7(6)    yes
C20 . C19 . C27 . 120.8(6)    yes
C19 . C20 . C21 . 121.7(5)    yes
C19 . C20 . H201 . 118.9    no
C21 . C20 . H201 . 119.5    no
C20 . C21 . C22 . 117.4(6)    yes
C20 . C21 . H211 . 122.3    no
C22 . C21 . H211 . 120.2    no
C21 . C22 . C23 . 121.8(6)    yes
C21 . C22 . C28 . 122.9(6)    yes
C23 . C22 . C28 . 115.1(5)    yes
C22 . C23 . C24 . 123.4(6)    yes
C22 . C23 . H231 . 118.3    no
C24 . C23 . H231 . 118.3    no
C23 . C24 . C25 . 118.2(6)    yes
C23 . C24 . H241 . 120.0    no
C25 . C24 . H241 . 121.8    no
C24 . C25 . N2 . 118.1(5)    yes
C24 . C25 . C26 . 122.5(6)    yes
N2 . C25 . C26 . 119.4(6)    yes
C25 . C26 . H261 . 111.3    no
C25 . C26 . H262 . 108.6    no
H261 . C26 . H262 . 109.2    no
C25 . C26 . H263 . 109.6    no
H261 . C26 . H263 . 108.7    no
H262 . C26 . H263 . 109.4    no
C19 . C27 . N1 . 124.6(6)    yes
C19 . C27 . C28 . 118.5(6)    yes
N1 . C27 . C28 . 116.8(5)    yes
C27 . C28 . C22 . 118.5(5)    yes
C27 . C28 . N2 . 119.8(6)    yes
C22 . C28 . N2 . 121.6(6)    yes
O5 . C29 . C30 . 125.6(6)    yes
O5 . C29 . H291 . 117.4    no
C30 . C29 . H291 . 117.0    no
C29 . C30 . C31 . 125.3(6)    yes
C29 . C30 . C35 . 117.0(6)    yes
C31 . C30 . C35 . 117.7(6)    yes
C30 . C31 . O6 . 126.0(6)    yes
C30 . C31 . C32 . 120.3(6)    yes
O6 . C31 . C32 . 113.7(5)    yes
C31 . C32 . C33 . 120.3(6)    yes
C31 . C32 . Br5 . 119.3(5)    yes
C33 . C32 . Br5 . 120.2(5)    yes
C32 . C33 . C34 . 119.4(6)    yes
C32 . C33 . H331 . 120.9    no
C34 . C33 . H331 . 119.8    no
C33 . C34 . C35 . 120.4(6)    yes
C33 . C34 . Br6 . 117.8(5)    yes
C35 . C34 . Br6 . 121.8(5)    yes
C30 . C35 . C34 . 121.9(6)    yes
C30 . C35 . H351 . 118.9    no
C34 . C35 . H351 . 119.2    no
O7 . C36 . C37 . 127.5(6)    yes
O7 . C36 . H361 . 116.6    no
C37 . C36 . H361 . 115.9    no
C36 . C37 . C38 . 121.7(6)    yes
C36 . C37 . C42 . 116.6(6)    yes
C38 . C37 . C42 . 121.5(6)    yes
C37 . C38 . O8 . 127.5(6)    yes
C37 . C38 . C39 . 116.8(5)    yes
O8 . C38 . C39 . 115.6(6)    yes
C38 . C39 . C40 . 120.5(6)    yes
C38 . C39 . Br7 . 120.4(4)    yes
C40 . C39 . Br7 . 119.0(5)    yes
C39 . C40 . C41 . 121.4(6)    yes
C39 . C40 . H401 . 119.5    no
C41 . C40 . H401 . 119.1    no
C40 . C41 . C42 . 118.7(6)    yes
C40 . C41 . Br8 . 118.8(5)    yes
C42 . C41 . Br8 . 122.4(5)    yes
C37 . C42 . C41 . 121.0(6)    yes
C37 . C42 . H421 . 119.9    no
C41 . C42 . H421 . 119.2    no
C44 . C43 . H431 . 109.5    no
C44 . C43 . H432 . 108.8    no
H431 . C43 . H432 . 111.3    no
C44 . C43 . H433 . 107.4    no
H431 . C43 . H433 . 110.2    no
H432 . C43 . H433 . 109.5    no
C43 . C44 . N3 . 120.1(5)    yes
C43 . C44 . C45 . 120.1(5)    yes
N3 . C44 . C45 . 119.8(5)    yes
C44 . C45 . C46 . 120.1(6)    yes
C44 . C45 . H451 . 119.7    no
C46 . C45 . H451 . 120.2    no
C45 . C46 . C47 . 119.1(5)    yes
C45 . C46 . H461 . 120.8    no
C47 . C46 . H461 . 120.1    no
C46 . C47 . C48 . 122.2(5)    yes
C46 . C47 . C55 . 117.9(5)    yes
C48 . C47 . C55 . 119.8(5)    yes
C47 . C48 . C49 . 120.0(5)    yes
C47 . C48 . H481 . 120.2    no
C49 . C48 . H481 . 119.8    no
C48 . C49 . C50 . 120.6(5)    yes
C48 . C49 . H491 . 119.2    no
C50 . C49 . H491 . 120.2    no
C49 . C50 . C51 . 120.6(5)    yes
C49 . C50 . C56 . 120.8(6)    yes
C51 . C50 . C56 . 118.6(5)    yes
C50 . C51 . C52 . 117.7(6)    yes
C50 . C51 . H511 . 121.3    no
C52 . C51 . H511 . 121.0    no
C51 . C52 . C53 . 120.8(6)    yes
C51 . C52 . H521 . 120.1    no
C53 . C52 . H521 . 119.2    no
C52 . C53 . N4 . 121.0(5)    yes
C52 . C53 . C54 . 119.4(6)    yes
N4 . C53 . C54 . 118.7(5)    yes
C53 . C54 . H541 . 111.2    no
C53 . C54 . H542 . 108.6    no
H541 . C54 . H542 . 109.4    no
C53 . C54 . H543 . 108.3    no
H541 . C54 . H543 . 110.2    no
H542 . C54 . H543 . 109.1    no
C47 . C55 . N3 . 122.0(5)    yes
C47 . C55 . C56 . 121.5(5)    yes
N3 . C55 . C56 . 116.3(5)    yes
C55 . C56 . C50 . 117.3(5)    yes
C55 . C56 . N4 . 119.5(5)    yes
C50 . C56 . N4 . 123.2(5)    yes
loop_
 _geom_hbond_atom_site_label_D
 _geom_hbond_site_symmetry_D
 _geom_hbond_atom_site_label_H
 _geom_hbond_site_symmetry_H
 _geom_hbond_atom_site_label_A
 _geom_hbond_site_symmetry_A
 _geom_hbond_angle_DHA
 _geom_hbond_distance_DH
 _geom_hbond_distance_HA
 _geom_hbond_distance_DA
 _geom_hbond_publ_flag
C12 . H121 . O7 1_455 124 0.94 2.58 3.197(9)    yes
C15 . H152 . O3 . 126 0.95 2.30 2.957(9)    yes
C26 . H262 . O2 . 126 0.95 2.31 2.974(9)    yes
C43 . H431 . O7 . 130 0.96 2.35 3.060(9)    yes
C54 . H541 . O6 . 128 0.96 2.31 2.990(9)    yes


_iucr_refine_instructions_details
;
#
# Punched on 01/03/24 at 11:45:56
#
#LIST     12                                                                    
BLOCK SCALE X'S  U'S 
RIDE C   (   1,X'S) H   (  11,X'S) 
RIDE C   (   5,X'S) H   (  51,X'S) 
RIDE C   (   7,X'S) H   (  71,X'S) 
RIDE C   (   8,X'S) H   (  81,X'S) 
RIDE C   (  12,X'S) H   ( 121,X'S) 
RIDE C   (  14,X'S) H   ( 141,X'S) 
RIDE C   (  15,X'S) H   ( 151,X'S) H   ( 152,X'S) H   ( 153,X'S) 
RIDE C   (  17,X'S) H   ( 171,X'S) 
RIDE C   (  18,X'S) H   ( 181,X'S) 
RIDE C   (  20,X'S) H   ( 201,X'S) 
RIDE C   (  21,X'S) H   ( 211,X'S) 
RIDE C   (  23,X'S) H   ( 231,X'S) 
RIDE C   (  24,X'S) H   ( 241,X'S) 
RIDE C   (  26,X'S) H   ( 261,X'S) H   ( 262,X'S) H   ( 263,X'S) 
RIDE C   (  29,X'S) H   ( 291,X'S) 
RIDE C   (  33,X'S) H   ( 331,X'S) 
RIDE C   (  35,X'S) H   ( 351,X'S) 
RIDE C   (  36,X'S) H   ( 361,X'S) 
RIDE C   (  40,X'S) H   ( 401,X'S) 
RIDE C   (  42,X'S) H   ( 421,X'S) 
RIDE C   (  43,X'S) H   ( 431,X'S) H   ( 432,X'S) H   ( 433,X'S) 
RIDE C   (  45,X'S) H   ( 451,X'S) 
RIDE C   (  46,X'S) H   ( 461,X'S) 
RIDE C   (  48,X'S) H   ( 481,X'S) 
RIDE C   (  49,X'S) H   ( 491,X'S) 
RIDE C   (  51,X'S) H   ( 511,X'S) 
RIDE C   (  52,X'S) H   ( 521,X'S) 
RIDE C   (  54,X'S) H   ( 541,X'S) H   ( 542,X'S) H   ( 543,X'S) 
END                                                                             
#
# Punched on 01/03/24 at 11:45:56
#
#LIST     16                                                                    
NO 
REM   HREST   START (DO NOT REMOVE THIS LINE) 
REM   HREST   END (DO NOT REMOVE THIS LINE) 
REM   THERMSIM   START (DO NOT REMOVE THIS LINE) 
END                                                                             
;
# looking for ARCHIVE-HKL.CIF 
 
_iucr_refine_reflections_details 
; 
# An asterisk in column 34 indicates a format overflow 
# Data was input as F-squared 
   0   0   1    0.01    0.02 
   0   0   1   -0.02    0.01 
   0   0  -1    0.00    0.01 
   0   0  -2   -0.16    0.03 
   0   0   2   -0.50    0.03 
   0   0  -2    0.42    0.07 
   0   0  -3    0.31    0.09 
   0   0   3    0.19    0.24 
   0   0  -3   -0.02    0.22 
   0   0   3   -0.08    0.06 
   0   0   3    0.40    0.09 
   0   0  -4   10.48    0.33 
   0   0  -4   10.03    0.11 
   0   0   4   10.06    0.27 
   0   0   4   10.08    0.10 
   0   0   4    9.96    0.06 
   0   0   5    0.07    0.36 
   0   0   5    0.07    0.07 
   0   0  -5    0.22    0.11 
   0   0  -5    0.00    0.35 
   0   0   5   -0.01    0.10 
   0   0  -6  118.58    1.37 
   0   0   6  121.12    1.25 
   0   0   6  118.34    0.91 
   0   0  -6  119.30    1.20 
   0   0   6  118.75    1.31 
   0   0   7    0.71    0.52 
   0   0   7    0.12    0.10 
   0   0  -7   -0.01    0.14 
   0   0  -7    0.15    0.46 
   0   0   7    0.06    0.13 
   0   0   8    3.20    0.14 
   0   0   8    3.29    0.11 
   0   0  -8    3.58    0.52 
   0   0   8    3.69    0.56 
   0   0  -8    2.88    0.16 
   0   0   9   -0.06    0.11 
   0   0   9    0.75    0.61 
   0   0  -9   -0.96    0.53 
   0   0   9   -0.16    0.14 
   0   0  -9   -0.13    0.18 
   0   0  10    3.05    0.71 
   0   0 -10    2.08    0.20 
   0   0 -10    2.30    0.75 
   0   0  10    2.04    0.13 
   0   0  11   -0.43    0.75 
   0   0  11    0.12    0.14 
   0   0  12    4.92    0.88 
   0   0  13   -0.37    0.17 
   0   0  13    0.59    0.89 
   0   0  14    2.08    0.96 
   0   0  15    0.68    0.99 
   0   0  16    3.98    0.93 
   0   0  17   -0.17    1.23 
   0   1   0    0.00    0.00 
   0  -1   0   -0.01    0.00 
   0  -1   0    0.00    0.01 
   0   1   1    1.15    0.02 
   0   1   1    1.18    0.05 
   0   1   1    1.11    0.01 
   0   1  -1    1.12    0.02 
   0  -1  -1    1.13    0.02 
   0  -1  -1    1.14    0.02 
   0  -1   1    1.08    0.01 
   0  -1   1    1.06    0.05 
   0  -1  -1    1.11    0.01 
   0   1   2    0.92    0.16 
   0   1   2    0.75    0.03 
   0   1  -2    0.66    0.09 
   0   1  -2    0.69    0.02 
   0   1  -2    0.80    0.02 
   0  -1   2    0.81    0.04 
   0  -1   2    0.82    0.13 
   0  -1   2    0.80    0.03 
   0  -1  -2    0.79    0.03 
   0  -1  -2    0.76    0.07 
   0   1   3  136.93    1.30 
   0   1  -3  133.13    0.93 
   0   1  -3  132.17    1.12 
   0   1   3  135.85    1.10 
   0   1  -3  135.14    1.25 
   0  -1   3  134.51    1.16 
   0  -1  -3  134.45    1.19 
   0  -1   3  134.14    0.96 
   0  -1   3  135.85    1.24 
   0  -1  -3  134.59    1.13 
   0   1   4  203.27    2.17 
   0   1  -4  207.83    2.12 
   0   1  -4  206.05    2.22 
   0   1   4  204.05    2.02 
   0   1  -4  205.37    1.84 
   0  -1   4  208.69    2.15 
   0  -1  -4  204.02    2.05 
   0  -1   4  204.78    2.16 
   0  -1  -4  206.00    2.24 
   0  -1   4  204.48    1.84 
   0   1   5    9.00    0.09 
   0   1  -5    9.06    0.08 
   0   1  -5   10.39    0.41 
   0   1  -5    8.99    0.11 
   0   1   5    9.01    0.08 
   0   1   5   10.78    0.42 
   0  -1   5   10.78    0.35 
   0  -1  -5   10.63    0.33 
   0  -1   5    9.42    0.09 
   0  -1   5    8.89    0.10 
   0  -1  -5    8.97    0.12 
   0   1   6    3.23    0.09 
   0   1   6    2.99    0.12 
   0   1  -6    4.47    0.46 
   0   1  -6    3.19    0.14 
   0   1   6    5.11    0.48 
   0  -1  -6    3.08    0.14 
   0  -1  -6    4.55    0.46 
   0  -1   6    5.28    0.50 
   0  -1   6    3.39    0.10 
   0  -1   6    3.03    0.12 
   0   1  -7  155.64    1.91 
   0   1   7  156.79    1.34 
   0   1   7  157.05    1.87 
   0   1   7  158.19    1.76 
   0   1  -7  155.01    1.60 
   0  -1  -7  157.15    1.71 
   0  -1   7  154.96    1.72 
   0  -1   7  155.80    1.36 
   0  -1  -7  155.68    1.94 
   0  -1   7  156.39    1.82 
   0   1   8    5.09    0.15 
   0   1  -8    4.95    0.17 
   0   1  -8    5.93    0.54 
   0   1   8    5.16    0.10 
   0   1   8    5.91    0.57 
   0  -1   8    5.18    0.12 
   0  -1   8    4.99    0.14 
   0  -1  -8    4.96    0.18 
   0  -1   8    5.33    0.57 
   0  -1  -8    6.21    0.56 
   0   1   9    3.68    0.16 
   0   1   9    5.62    0.64 
   0   1  -9    4.22    0.58 
   0   1   9    3.90    0.12 
   0  -1  -9    4.19    0.57 
   0  -1   9    5.20    0.52 
   0  -1  -9    3.71    0.19 
   0  -1   9    4.02    0.13 
   0  -1   9    3.82    0.14 
   0   1  10    0.55    0.52 
   0   1  10    0.13    0.12 
   0   1 -10   -0.10    0.54 
   0  -1 -10    0.26    0.20 
   0  -1  10    0.07    0.16 
   0  -1  10    0.19    0.13 
   0  -1  10    0.46    0.53 
   0   1  11    0.17    0.13 
   0   1  11    0.71    0.76 
   0  -1  11    0.60    0.75 
   0  -1 -11    0.15    0.23 
   0  -1  11    0.25    0.15 
   0   1  12    1.92    0.87 
   0   1  12    0.09    0.15 
   0  -1  12    0.01    0.16 
   0  -1  12    0.15    0.82 
   0   1  13    5.77    0.94 
   0  -1  13    4.86    0.93 
   0   1  14   -0.56    0.26 
   0   1  14    0.51    0.75 
   0  -1  14    1.56    1.02 
   0   1  15    0.79    1.05 
   0  -1  15    0.22    1.05 
   0   1  16    1.50    1.16 
   0  -1  16    0.44    1.14 
   0   1  17    0.90    1.21 
   0  -1  17    1.22    1.23 
   0   2   0    1.10    0.00 
   0   2   0    1.08    0.02 
   0   2   0    1.10    0.01 
   0   2   0    1.07    0.03 
   0  -2   0    1.10    0.01 
   0  -2   0    1.13    0.04 
   0  -2   0    1.06    0.02 
   0  -2   0    1.09    0.00 
   0   2  -1   -0.15    0.05 
   0   2  -1   -0.21    0.02 
   0   2   1   -0.06    0.01 
   0   2   1    0.06    0.05 
   0   2   1    0.19    0.04 
   0   2  -1   -0.14    0.03 
   0  -2  -1   -0.06    0.04 
   0  -2   1    0.01    0.07 
   0  -2   1    0.05    0.03 
   0  -2  -1   -0.26    0.03 
   0  -2   1   -0.21    0.02 
   0  -2  -1    0.01    0.02 
   0   2   2   12.86    0.05 
   0   2   2   13.65    0.22 
   0   2  -2   13.26    0.18 
   0  -2   2   14.24    0.25 
   0  -2   2   13.24    0.07 
   0  -2  -2   13.04    0.07 
   0  -2  -2   13.58    0.18 
   0   2  -3  112.61    0.95 
   0   2  -3  111.50    0.83 
   0   2   3  113.81    0.96 
   0   2   3  111.77    1.02 
   0  -2   3  112.55    0.85 
   0  -2   3  114.36    1.11 
   0  -2   3  114.53    1.04 
   0  -2  -3  113.90    1.18 
   0  -2  -3  114.81    1.01 
   0   2   4  113.95    1.08 
   0   2   4  116.54    1.22 
   0   2  -4  113.65    0.88 
   0   2  -4  115.83    1.10 
   0  -2  -4  113.93    1.00 
   0  -2   4  113.83    0.90 
   0  -2   4  115.91    1.12 
   0  -2  -4  114.29    1.23 
   0  -2   4  114.58    1.12 
   0   2   5    4.10    0.11 
   0   2   5    5.30    0.39 
   0   2  -5    4.23    0.08 
   0   2  -5    4.68    0.38 
   0  -2   5    4.22    0.09 
   0  -2  -5    4.08    0.12 
   0  -2   5    5.01    0.33 
   0  -2  -5    4.94    0.30 
   0  -2   5    4.13    0.10 
   0   2   6    1.33    0.12 
   0   2  -6    0.82    0.42 
   0   2  -6    1.13    0.08 
   0   2   6    1.41    0.45 
   0  -2  -6    1.12    0.13 
   0  -2   6    0.91    0.45 
   0  -2   6    1.32    0.10 
   0  -2   6    1.07    0.11 
   0  -2  -6    0.17    0.40 
   0   2   7    9.01    0.10 
   0   2  -7    8.84    0.11 
   0   2   7   10.97    0.57 
   0   2   7    8.89    0.15 
   0   2  -7   10.21    0.53 
   0  -2  -7    8.66    0.14 
   0  -2   7   10.28    0.57 
   0  -2   7    8.85    0.14 
   0  -2  -7   10.96    0.54 
   0  -2   7    9.38    0.13 
   0   2   8    0.33    0.55 
   0   2  -8   -0.23    0.51 
   0   2   8    0.21    0.09 
   0   2   8    0.07    0.10 
   0  -2   8    0.17    0.12 
   0  -2  -8   -0.60    0.50 
   0  -2  -8    0.40    0.19 
   0  -2   8    0.93    0.59 
   0  -2   8    0.14    0.13 
   0   2   9   31.00    0.53 
   0   2   9   30.84    0.73 
   0   2  -9   32.10    0.83 
   0  -2  -9   32.17    0.81 
   0  -2   9   30.82    0.61 
   0  -2   9   31.72    0.84 
   0   2  10   -0.14    0.66 
   0   2  10    0.12    0.12 
   0   2 -10   -0.39    0.70 
   0  -2  10   -0.16    0.13 
   0  -2  10    0.52    0.69 
   0  -2 -10   -0.09    0.21 
   0  -2  10    0.22    0.16 
   0   2  11    4.83    0.14 
   0   2  11    6.10    0.78 
   0  -2  11    5.82    0.61 
   0  -2 -11    4.79    0.24 
   0  -2  11    4.74    0.17 
   0   2  12    5.46    0.16 
   0   2  12    6.94    0.86 
   0  -2 -12    5.59    0.28 
   0  -2  12    5.43    0.18 
   0  -2  12    7.26    0.88 
   0   2  13   10.38    0.17 
   0   2  13   12.76    0.77 
   0  -2  13   13.52    1.02 
   0  -2  13   11.00    0.21 
   0   2  14    1.48    1.01 
   0  -2  14    2.30    1.02 
   0   2  15   -0.03    1.01 
   0  -2  15    1.74    1.09 
   0   2  16    2.43    0.88 
   0  -2  16    2.07    1.12 
   0   2  17    0.90    1.25 
   0  -2  17    0.36    1.20 
   0   3   0    0.02    0.03 
   0   3   0    0.02    0.05 
   0   3   0    0.01    0.01 
   0   3   0   -0.02    0.03 
   0  -3   0   -0.01    0.01 
   0  -3   0    0.00    0.03 
   0  -3   0    0.00    0.03 
   0  -3   0   -0.02    0.08 
   0   3   2    3.97    0.16 
   0   3  -2    4.63    0.27 
   0   3  -2    3.70    0.14 
   0  -3   2    3.23    0.09 
   0  -3   2    4.86    0.29 
   0  -3   2    3.31    0.12 
   0  -3  -2    3.99    0.19 
   0  -3  -2    4.32    0.27 
   0   3  -3   24.51    0.36 
   0   3   3   25.36    0.58 
   0   3   3   23.21    0.41 
   0   3  -3   23.31    0.42 
   0  -3   3   23.57    0.48 
   0  -3  -3   24.73    0.53 
   0  -3   3   24.83    0.48 
   0  -3   3   25.69    0.43 
   0  -3  -3   25.89    0.65 
   0  -3  -3   23.50    0.46 
   0   3   4   44.44    0.61 
   0   3  -4   45.22    0.61 
   0   3  -4   45.48    0.46 
   0   3   4   46.02    0.60 
   0  -3   4   46.11    0.68 
   0  -3  -4   45.12    0.63 
   0  -3  -4   43.97    0.58 
   0  -3  -4   45.80    0.61 
   0  -3   4   45.47    0.64 
   0  -3   4   45.13    0.51 
   0   3   5    2.37    0.10 
   0   3  -5    2.16    0.37 
   0   3   5    2.68    0.39 
   0   3  -5    2.32    0.08 
   0  -3  -5    2.37    0.21 
   0  -3   5    2.52    0.41 
   0  -3   5    2.41    0.09 
   0  -3  -5    2.32    0.12 
   0  -3  -5    2.85    0.36 
   0  -3   5    2.43    0.09 
   0   3   6  111.86    1.23 
   0   3  -6  110.24    1.19 
   0   3  -6  110.74    0.94 
   0   3   6  109.05    1.31 
   0  -3  -6  109.80    1.42 
   0  -3  -6  108.43    1.15 
   0  -3   6  110.90    1.24 
   0  -3  -6  110.25    1.17 
   0  -3   6  108.70    1.23 
   0  -3   6  108.18    0.92 
   0   3  -7   35.46    0.48 
   0   3  -7   36.16    0.71 
   0   3   7   36.60    0.82 
   0  -3   7   36.55    0.84 
   0  -3   7   35.96    0.75 
   0  -3   7   36.52    0.58 
   0  -3  -7   36.16    0.75 
   0   3  -8   41.80    0.71 
   0   3   8   43.30    0.48 
   0   3  -8   44.02    0.51 
   0   3   8   43.78    0.77 
   0  -3   8   43.02    0.78 
   0  -3   8   44.06    0.60 
   0  -3  -8   40.91    0.45 
   0  -3  -8   43.41    0.73 
   0   3   9   -0.09    0.60 
   0   3   9    0.01    0.11 
   0   3   9   -0.11    0.11 
   0   3  -9   -0.55    0.56 
   0  -3   9   -0.14    0.14 
   0  -3  -9   -0.41    0.54 
   0  -3   9   -0.01    0.14 
   0  -3  -9   -0.15    0.32 
   0  -3   9   -0.52    0.61 
   0  -3  -9   -0.11    0.19 
   0   3  10   12.36    0.71 
   0   3  10   11.54    0.13 
   0  -3 -10   11.12    0.22 
   0  -3  10   12.86    0.73 
   0  -3  10   11.33    0.16 
   0  -3  10   11.41    0.16 
   0  -3 -10   11.92    0.41 
   0   3  11    0.51    0.58 
   0   3  11    0.36    0.13 
   0  -3  11    0.81    0.17 
   0  -3  11    0.72    0.78 
   0  -3 -11    0.73    0.25 
   0   3  12    1.85    0.84 
   0   3  12    0.95    0.15 
   0  -3  12    1.00    0.83 
   0  -3  12    0.73    0.18 
   0  -3 -12    0.95    0.21 
   0   3  13   -0.02    0.16 
   0   3  13    1.20    0.92 
   0  -3  13    1.78    0.96 
   0  -3 -13    0.54    0.31 
   0  -3  13    0.53    0.20 
   0   3  14   -0.04    0.94 
   0  -3  14    0.77    0.97 
   0  -3  14   -0.24    0.19 
   0   3  15    3.20    1.06 
   0  -3  15    3.22    1.02 
   0   3  16    0.23    1.14 
   0  -3  16    0.60    1.12 
   0   3  17    0.97    0.95 
   0  -3  17    2.12    1.24 
   0   4   0   37.32    0.32 
   0   4   0   37.17    0.36 
   0   4   0   35.29    0.30 
   0  -4   0   37.09    0.29 
   0  -4   0   37.12    0.33 
   0  -4   0   37.09    0.31 
   0  -4   0   36.96    0.33 
   0   4   1  159.24    1.35 
   0   4   1  158.44    1.32 
   0   4  -1  156.47    1.32 
   0   4  -1  161.29    1.34 
   0   4   1  157.21    1.33 
   0   4  -1  161.26    1.38 
   0   4   1  156.22    1.34 
   0  -4   1  158.87    1.29 
   0  -4   1  155.13    1.29 
   0  -4  -1  156.43    1.32 
   0  -4   1  158.90    1.36 
   0  -4  -1  158.01    1.35 
   0  -4  -1  157.76    1.35 
   0   4  -2    4.49    0.15 
   0   4   2    4.28    0.08 
   0   4  -2    4.94    0.30 
   0   4   2    4.47    0.30 
   0   4  -2    4.53    0.10 
   0   4   2    4.87    0.18 
   0  -4  -2    4.18    0.07 
   0  -4   2    4.86    0.24 
   0  -4   2    4.33    0.14 
   0  -4  -2    4.68    0.29 
   0  -4  -2    5.29    0.23 
   0  -4   2    4.29    0.09 
   0   4  -3   10.11    0.09 
   0   4  -3   10.18    0.32 
   0   4  -3    9.75    0.15 
   0   4   3   10.26    0.33 
   0   4   3    9.95    0.18 
   0   4   3    9.93    0.09 
   0  -4   3    9.96    0.11 
   0  -4   3   10.73    0.35 
   0  -4  -3   10.09    0.11 
   0  -4  -3    9.78    0.30 
   0  -4  -3   10.32    0.22 
   0   4   4    0.50    0.09 
   0   4   4    0.46    0.26 
   0   4  -4    0.38    0.34 
   0   4  -4    0.49    0.08 
   0   4  -4    0.44    0.16 
   0  -4  -4    0.45    0.17 
   0  -4   4    0.54    0.10 
   0  -4   4    0.44    0.07 
   0  -4  -4    0.44    0.08 
   0  -4   4    0.51    0.35 
   0  -4  -4    0.32    0.31 
   0   4  -5    6.75    0.46 
   0   4   5    6.99    0.48 
   0   4  -5    7.40    0.34 
   0  -4   5    6.95    0.41 
   0  -4  -5    5.73    0.29 
   0  -4  -5    7.29    0.46 
   0   4  -6   55.90    0.60 
   0   4   6   56.68    0.95 
   0   4  -6   56.17    0.83 
   0   4   6   56.68    0.87 
   0  -4   6   56.36    0.70 
   0  -4  -6   56.82    0.90 
   0  -4   6   54.35    0.86 
   0  -4   6   56.25    0.85 
   0  -4  -6   55.68    0.82 
   0  -4  -6   55.85    0.71 
   0   4   7   39.85    0.93 
   0   4  -7   39.13    0.50 
   0   4  -7   38.49    0.78 
   0   4   7   39.10    0.83 
   0  -4  -7   39.44    0.86 
   0  -4  -7   37.88    0.63 
   0  -4   7   38.31    0.80 
   0  -4   7   39.61    0.63 
   0  -4   7   38.50    0.69 
   0  -4  -7   35.97    0.47 
   0   4  -8    1.17    0.11 
   0   4   8    1.46    0.56 
   0   4   8    0.72    0.13 
   0   4  -8    0.99    0.40 
   0  -4   8    0.92    0.12 
   0  -4   8    0.91    0.13 
   0  -4   8    1.02    0.58 
   0  -4  -8    0.79    0.17 
   0  -4  -8    0.74    0.31 
   0  -4  -8    1.31    0.53 
   0   4  -9   17.68    0.67 
   0   4  -9   15.53    0.16 
   0   4   9   15.15    0.14 
   0  -4  -9   16.19    0.40 
   0  -4   9   15.31    0.19 
   0  -4  -9   14.63    0.23 
   0  -4   9   14.89    0.17 
   0  -4  -9   18.83    0.69 
   0  -4   9   18.69    0.77 
   0   4 -10    1.19    0.12 
   0   4  10    1.64    0.68 
   0   4  10    1.18    0.12 
   0  -4 -10    0.90    0.17 
   0  -4  10    1.36    0.71 
   0  -4  10    1.17    0.15 
   0  -4 -10    0.30    0.36 
   0  -4  10    0.98    0.16 
   0   4  11    1.36    0.13 
   0   4  11    1.46    0.57 
   0  -4  11    1.22    0.17 
   0  -4  11    2.33    0.80 
   0   4  12    1.02    0.83 
   0   4  12   -0.08    0.15 
   0  -4  12    0.72    0.83 
   0  -4  12    0.07    0.19 
   0  -4 -12    0.14    0.22 
   0   4  13   11.21    0.97 
   0   4  13    9.35    0.18 
   0  -4 -13    9.88    0.35 
   0  -4  13    9.36    0.21 
   0  -4  13   10.52    0.97 
   0   4  14   -0.21    0.96 
   0  -4  14   -0.09    0.75 
   0  -4 -14    0.00    0.31 
   0   4  15    4.56    1.07 
   0  -4  15    5.08    1.10 
   0   4  16    0.99    1.13 
   0  -4  16    0.45    1.11 
   0   4  17    0.47    1.22 
   0  -4  17    0.62    1.08 
   0   5   0   -0.24    0.24 
   0   5   0    0.05    0.11 
   0   5   0   -0.02    0.04 
   0   5   0    0.39    0.17 
   0   5   0   -0.11    0.20 
   0  -5   0    0.03    0.11 
   0  -5   0    0.45    0.17 
   0  -5   0   -0.12    0.25 
   0  -5   0   -0.01    0.05 
   0   5   1   14.75    0.35 
   0   5   1   15.75    0.35 
   0   5  -1   15.79    0.34 
   0   5   1   13.80    0.21 
   0   5  -1   16.10    0.38 
   0  -5  -1   15.92    0.39 
   0  -5  -1   14.88    0.29 
   0  -5   1   14.98    0.24 
   0  -5   1   14.64    0.34 
   0  -5   1   13.10    0.14 
   0  -5   1   14.02    0.20 
   0  -5  -1   13.90    0.23 
   0   5   2  422.79    6.01 
   0   5  -2  416.57    5.77 
   0   5  -2  421.85    5.97 
   0   5   2  420.41    5.92 
   0   5   2  421.94    6.01 
   0   5  -2  422.80    5.90 
   0   5   2  420.23    5.88 
   0  -5  -2  429.27    6.14 
   0  -5   2  419.24    5.79 
   0  -5  -2  413.06    5.74 
   0  -5   2  418.94    5.87 
   0  -5   2  421.47    5.94 
   0  -5  -2  419.18    5.97 
   0   5   3   38.43    0.51 
   0   5  -3   38.45    0.55 
   0   5  -3   38.54    0.45 
   0   5  -3   38.66    0.50 
   0   5   3   38.12    0.56 
   0   5   3   37.94    0.50 
   0  -5   3   38.16    0.57 
   0  -5   3   37.98    0.43 
   0  -5  -3   37.55    0.46 
   0  -5  -3   38.87    0.57 
   0  -5  -3   38.95    0.51 
   0  -5   3   39.06    0.47 
   0   5  -4   27.50    0.41 
   0   5   4   26.64    0.43 
   0   5  -4   27.68    0.42 
   0   5  -4   27.22    0.43 
   0  -5   4   27.03    0.49 
   0  -5  -4   28.01    0.43 
   0  -5  -4   28.48    0.56 
   0   5  -5  139.41    1.22 
   0   5   5  142.24    1.41 
   0   5  -5  139.87    1.30 
   0   5   5  139.80    1.52 
   0   5  -5  140.01    1.36 
   0  -5  -5  138.55    1.58 
   0  -5   5  138.67    1.32 
   0  -5   5  141.57    1.42 
   0  -5  -5  140.46    1.44 
   0  -5  -5  141.38    1.43 
   0  -5   5  140.75    1.43 
   0   5  -6    7.17    0.41 
   0   5   6    5.68    0.13 
   0   5  -6    5.95    0.11 
   0   5   6    6.60    0.50 
   0  -5   6    5.82    0.14 
   0  -5   6    5.71    0.12 
   0  -5  -6    4.76    0.31 
   0  -5   6    7.30    0.52 
   0  -5  -6    5.79    0.16 
   0  -5  -6    7.22    0.48 
   0   5  -7    1.70    0.51 
   0   5  -7    1.28    0.11 
   0   5   7    1.42    0.11 
   0   5   7    1.78    0.54 
   0  -5   7    1.47    0.53 
   0  -5  -7    1.25    0.31 
   0  -5  -7    2.00    0.49 
   0  -5  -7    1.75    0.18 
   0  -5   7    1.55    0.15 
   0  -5   7    1.39    0.11 
   0   5  -8   67.84    0.72 
   0   5  -8   66.91    1.00 
   0   5   8   69.07    1.07 
   0   5   8   65.63    1.10 
   0  -5   8   66.89    1.06 
   0  -5  -8   67.64    1.35 
   0  -5  -8   68.81    1.02 
   0  -5   8   68.45    1.10 
   0  -5  -8   67.10    1.01 
   0  -5   8   67.50    0.84 
   0   5  -9    2.28    0.41 
   0   5  -9    3.12    0.12 
   0   5   9    2.91    0.60 
   0  -5   9    3.05    0.13 
   0  -5  -9    2.84    0.20 
   0  -5   9    2.93    0.16 
   0  -5   9    3.17    0.49 
   0  -5  -9    3.09    0.43 
   0  -5  -9    2.58    0.35 
   0   5  10    0.57    0.54 
   0   5  10    0.03    0.11 
   0   5 -10    0.09    0.13 
   0  -5  10   -0.14    0.17 
   0  -5  10   -0.02    0.70 
   0  -5 -10   -0.04    0.18 
   0  -5  10    0.06    0.14 
   0   5 -11    5.96    0.13 
   0   5  11    6.12    0.60 
   0   5  11    5.78    0.14 
   0  -5  11    4.99    0.76 
   0  -5  11    5.71    0.19 
   0   5  12    5.13    0.16 
   0   5  12    6.55    0.71 
   0  -5 -12    4.95    0.24 
   0  -5  12    6.28    0.73 
   0  -5  12    4.63    0.21 
   0   5  13    8.00    0.96 
   0   5  13    5.57    0.16 
   0  -5 -13    6.05    0.36 
   0  -5  13    7.87    1.00 
   0  -5  13    5.47    0.21 
   0   5  14   14.82    1.08 
   0  -5  14   14.62    1.01 
   0   5  15    0.38    1.05 
   0  -5  15    0.86    1.00 
   0   5  16    0.19    1.09 
   0  -5  16   -0.02    1.04 
   0   5  17    1.11    1.24 
   0  -5  17    0.95    1.14 
   0   6   0    0.80    0.30 
   0   6   0    0.84    0.09 
   0   6   0    0.73    0.22 
   0   6   0    0.65    0.05 
   0   6   0    0.82    0.20 
   0  -6   0    0.55    0.30 
   0  -6   0    0.95    0.18 
   0  -6   0    0.67    0.05 
   0  -6   0    0.68    0.10 
   0   6   1   38.53    0.54 
   0   6   1   40.23    0.63 
   0   6  -1   41.87    0.66 
   0   6   1   40.78    0.52 
   0   6   1   39.87    0.53 
   0   6  -1   41.61    0.62 
   0   6   1   39.33    0.56 
   0   6  -1   40.13    0.57 
   0  -6   1   39.61    0.59 
   0  -6  -1   41.19    0.62 
   0  -6  -1   39.27    0.60 
   0  -6  -1   41.86    0.59 
   0  -6  -1   39.04    0.64 
   0  -6   1   40.18    0.55 
   0  -6   1   39.73    0.61 
   0  -6   1   40.04    0.42 
   0   6  -2   35.36    0.53 
   0   6   2   35.85    0.50 
   0   6   2   36.28    0.52 
   0   6  -2   35.78    0.52 
   0   6   2   35.83    0.46 
   0   6   2   36.01    0.59 
   0   6  -2   35.04    0.45 
   0  -6   2   36.00    0.45 
   0  -6   2   35.55    0.43 
   0  -6   2   36.29    0.61 
   0  -6  -2   35.14    0.46 
   0  -6  -2   35.39    0.51 
   0  -6  -2   36.64    0.58 
   0   6   3   34.09    0.60 
   0   6   3   33.20    0.60 
   0   6   3   33.51    0.64 
   0   6  -3   33.51    0.50 
   0   6  -3   33.04    0.53 
   0   6  -3   33.75    0.48 
   0  -6   3   33.35    0.60 
   0  -6   3   32.97    0.45 
   0  -6   3   33.11    0.58 
   0  -6  -3   33.07    0.56 
   0  -6  -3   33.50    0.61 
   0  -6  -3   32.90    0.67 
   0   6   4    0.35    0.24 
   0   6  -4    0.31    0.34 
   0   6  -4    0.51    0.19 
   0   6   4    0.25    0.06 
   0   6  -4    0.43    0.10 
   0   6   4    0.37    0.28 
   0  -6  -4    0.50    0.33 
   0  -6   4    0.48    0.12 
   0  -6  -4    0.58    0.24 
   0  -6   4    0.24    0.37 
   0  -6  -4    0.31    0.10 
   0   6   5  167.57    1.60 
   0   6  -5  166.71    1.49 
   0   6  -5  166.66    1.58 
   0   6   5  167.66    1.74 
   0   6  -5  167.89    1.51 
   0  -6  -5  166.68    1.71 
   0  -6   5  165.57    1.60 
   0  -6   5  167.51    1.69 
   0  -6   5  168.60    1.58 
   0  -6  -5  168.40    1.68 
   0  -6  -5  167.10    1.65 
   0   6   6   62.34    0.92 
   0   6   6   61.68    0.84 
   0   6  -6   60.92    0.87 
   0   6  -6   61.47    0.72 
   0   6  -6   60.40    0.76 
   0  -6  -6   61.39    0.75 
   0  -6  -6   62.77    0.99 
   0  -6  -6   64.18    1.15 
   0  -6   6   63.51    0.95 
   0  -6   6   62.43    0.93 
   0  -6   6   61.41    0.79 
   0   6  -7    5.73    0.14 
   0   6  -7    6.14    0.27 
   0   6   7    7.65    0.50 
   0   6   7    5.36    0.16 
   0   6  -7    7.55    0.48 
   0  -6  -7    5.52    0.19 
   0  -6   7    6.09    0.19 
   0  -6  -7    7.14    0.55 
   0  -6   7    5.60    0.14 
   0  -6   7    7.56    0.62 
   0  -6  -7    6.17    0.40 
   0   6  -8   -0.14    0.40 
   0   6   8   -0.13    0.14 
   0   6   8    0.21    0.45 
   0   6  -8   -0.03    0.12 
   0  -6  -8    0.23    0.19 
   0  -6   8    0.10    0.15 
   0  -6   8    0.19    0.12 
   0  -6  -8   -0.17    0.52 
   0  -6  -8   -0.16    0.34 
   0  -6   8   -0.37    0.57 
   0   6  -9    1.14    0.12 
   0   6   9    2.04    0.66 
   0   6  -9    2.11    0.61 
   0  -6   9    1.43    0.15 
   0  -6  -9    2.08    0.61 
   0  -6  -9    1.01    0.38 
   0  -6  -9    1.23    0.22 
   0  -6   9    1.07    0.16 
   0  -6   9    0.93    0.63 
   0   6  10    7.63    0.60 
   0   6 -10    6.56    0.15 
   0  -6  10    7.42    0.74 
   0  -6  10    6.47    0.20 
   0  -6 -10    6.30    0.21 
   0  -6  10    6.18    0.15 
   0   6  11    2.57    0.82 
   0   6  11    1.96    0.14 
   0   6 -11    2.10    0.15 
   0  -6  11    2.08    0.60 
   0  -6  11    1.66    0.20 
   0   6 -12    2.91    0.15 
   0   6  12    2.98    0.87 
   0   6  12    2.95    0.15 
   0  -6  12    3.04    0.65 
   0  -6 -12    2.48    0.30 
   0  -6  12    2.65    0.21 
   0   6  13    6.23    0.96 
   0   6  13    5.10    0.16 
   0  -6 -13    5.22    0.34 
   0  -6  13    5.65    0.90 
   0  -6  13    4.71    0.22 
   0   6  14    0.68    0.76 
   0  -6 -14   -0.35    0.35 
   0  -6  14   -0.48    0.22 
   0  -6  14    0.60    0.95 
   0   6  15    1.14    1.04 
   0  -6  15    1.07    1.00 
   0  -6 -15    0.31    0.37 
   0   6  16    1.10    1.16 
   0   6 -16    1.57    0.49 
   0  -6  16    2.12    1.12 
   0  -6  17    0.10    0.87 
   0   7   0   -0.18    0.29 
   0   7   0   -0.09    0.23 
   0   7   0    0.05    0.05 
   0   7   0    0.18    0.21 
   0   7   0    0.04    0.11 
   0  -7   0    0.27    0.19 
   0  -7   0   -0.01    0.13 
   0  -7   0    0.08    0.06 
   0  -7   0    0.04    0.24 
   0   7   1  202.86    1.95 
   0   7   1  198.96    1.94 
   0   7  -1  199.82    1.95 
   0   7   1  199.81    1.89 
   0   7   1  202.42    1.87 
   0   7  -1  201.34    1.91 
   0   7  -1  202.92    1.97 
   0   7   1  203.64    1.93 
   0  -7   1  202.75    1.88 
   0  -7   1  199.35    1.93 
   0  -7   1  200.78    1.94 
   0  -7  -1  199.83    1.94 
   0  -7  -1  199.94    1.90 
   0  -7  -1  200.51    1.92 
   0  -7   1  203.69    1.79 
   0  -7  -1  202.18    1.91 
   0   7  -2   52.27    0.61 
   0   7   2   51.67    0.53 
   0   7   2   52.15    0.56 
   0   7  -2   52.04    0.54 
   0   7  -2   52.47    0.59 
   0   7   2   51.60    0.56 
   0   7   2   51.20    0.50 
   0  -7   2   50.94    0.52 
   0  -7  -2   50.99    0.58 
   0  -7   2   52.14    0.40 
   0  -7  -2   52.62    0.61 
   0  -7   2   51.92    0.51 
   0  -7  -2   51.94    0.62 
   0  -7   2   52.05    0.67 
   0   7   3    4.05    0.08 
   0   7   3    5.70    0.39 
   0   7  -3    4.88    0.36 
   0   7   3    4.07    0.11 
   0   7  -3    4.52    0.19 
   0   7  -3    4.28    0.12 
   0   7   3    4.88    0.26 
   0  -7  -3    4.90    0.35 
   0  -7   3    4.57    0.17 
   0  -7   3    4.18    0.11 
   0  -7  -3    4.04    0.10 
   0  -7   3    4.80    0.37 
   0  -7  -3    4.60    0.24 
   0   7   4   49.39    0.70 
   0   7   4   49.47    0.70 
   0   7  -4   49.84    0.62 
   0   7   4   51.34    0.76 
   0   7  -4   50.60    0.69 
   0   7  -4   49.67    0.58 
   0  -7   4   51.16    0.63 
   0  -7  -4   51.22    0.76 
   0  -7   4   50.23    0.55 
   0  -7  -4   50.83    0.84 
   0  -7  -4   49.64    0.68 
   0  -7   4   50.48    0.72 
   0   7  -5    2.64    0.12 
   0   7   5    2.80    0.46 
   0   7   5    2.43    0.11 
   0   7  -5    3.13    0.44 
   0   7  -5    2.53    0.24 
   0   7   5    2.69    0.24 
   0  -7  -5    3.00    0.33 
   0  -7   5    2.64    0.15 
   0  -7  -5    2.50    0.10 
   0  -7  -5    2.80    0.24 
   0  -7   5    2.84    0.46 
   0   7   6    9.61    0.13 
   0   7   6   11.41    0.54 
   0   7  -6   11.93    0.54 
   0   7  -6   10.28    0.26 
   0   7  -6   10.18    0.14 
   0  -7  -6   12.10    0.53 
   0  -7  -6   11.15    0.36 
   0  -7   6   10.12    0.17 
   0  -7  -6    9.66    0.17 
   0  -7   6   11.97    0.57 
   0  -7   6    9.93    0.12 
   0   7   7    3.07    0.55 
   0   7  -7    2.82    0.52 
   0   7  -7    2.61    0.24 
   0   7  -7    2.90    0.12 
   0   7   7    2.77    0.10 
   0  -7   7    2.90    0.12 
   0  -7  -7    3.01    0.34 
   0  -7  -7    2.85    0.18 
   0  -7   7    2.75    0.16 
   0  -7   7    2.66    0.56 
   0  -7  -7    3.26    0.50 
   0   7  -8    6.26    0.32 
   0   7  -8    7.74    0.61 
   0   7   8    6.97    0.62 
   0   7  -8    5.72    0.15 
   0  -7  -8    5.34    0.21 
   0  -7   8    6.42    0.51 
   0  -7   8    5.60    0.19 
   0  -7  -8    7.00    0.47 
   0  -7  -8    6.56    0.38 
   0   7   9    0.76    0.65 
   0   7  -9    0.31    0.14 
   0   7  -9   -0.18    0.58 
   0   7  -9    0.23    0.29 
   0  -7   9    0.18    0.14 
   0  -7   9   -0.20    0.49 
   0  -7  -9    0.09    0.23 
   0  -7  -9   -0.07    0.42 
   0  -7   9    0.28    0.19 
   0   7 -10    1.53    0.31 
   0   7 -10    1.66    0.14 
   0   7  10    1.64    0.72 
   0  -7  10    1.68    0.14 
   0  -7  10    1.59    0.20 
   0  -7  10    1.88    0.73 
   0  -7 -10    1.53    0.25 
   0   7 -11    2.28    0.16 
   0   7 -11    2.86    0.39 
   0   7  11    2.99    0.84 
   0  -7  11    2.14    0.77 
   0  -7  11    1.73    0.16 
   0  -7 -11    2.28    0.30 
   0  -7  11    1.92    0.22 
   0   7  12    0.23    0.15 
   0   7 -12    0.32    0.16 
   0   7  12    0.39    0.87 
   0   7 -12    0.52    0.41 
   0  -7  12    0.15    0.66 
   0  -7 -12    0.03    0.33 
   0  -7  12   -0.43    0.22 
   0   7  13    0.27    0.16 
   0   7 -13    1.01    0.45 
   0   7  13    0.69    0.94 
   0  -7 -13   -0.01    0.27 
   0  -7  13   -0.12    0.67 
   0  -7  13   -0.12    0.24 
   0   7 -14    6.46    0.46 
   0   7  14    5.44    1.01 
   0  -7  14    6.41    0.99 
   0  -7 -14    4.27    0.37 
   0   7 -15    6.35    0.54 
   0   7  15    5.70    1.10 
   0  -7 -15    4.64    0.30 
   0  -7  15    6.07    1.05 
   0   7  16    3.84    1.17 
   0   7 -16    4.17    0.92 
   0  -7  16    2.86    0.85 
   0   8   0    3.32    0.13 
   0   8   0    4.16    0.34 
   0   8   0    3.45    0.35 
   0   8   0    3.71    0.23 
   0  -8   0    4.11    0.36 
   0  -8   0    3.79    0.21 
   0  -8   0    2.97    0.14 
   0   8   1    9.45    0.42 
   0   8   1    8.94    0.29 
   0   8  -1    8.71    0.25 
   0   8  -1    7.67    0.16 
   0   8   1    7.63    0.15 
   0  -8   1   10.32    0.42 
   0  -8   1    7.28    0.16 
   0  -8  -1   10.48    0.41 
   0  -8   1    8.92    0.24 
   0  -8  -1    8.94    0.27 
   0   8   2    4.55    0.07 
   0   8   2    5.13    0.38 
   0   8  -2    4.85    0.19 
   0   8  -2    5.35    0.28 
   0   8  -2    4.54    0.09 
   0   8   2    4.89    0.24 
   0   8   2    4.60    0.12 
   0  -8  -2    5.54    0.29 
   0  -8   2    5.17    0.36 
   0  -8  -2    4.52    0.08 
   0  -8  -2    4.86    0.22 
   0  -8   2    4.68    0.11 
   0  -8   2    4.53    0.05 
   0  -8   2    4.94    0.19 
   0   8  -3   73.76    0.75 
   0   8   3   73.50    0.79 
   0   8   3   72.67    0.71 
   0   8  -3   73.64    0.76 
   0   8   3   73.86    0.75 
   0   8  -3   73.56    0.68 
   0   8   3   75.02    0.85 
   0  -8   3   72.89    0.77 
   0  -8  -3   74.68    0.77 
   0  -8   3   75.04    0.66 
   0  -8  -3   72.99    0.73 
   0  -8   3   72.88    0.71 
   0  -8  -3   75.08    0.72 
   0   8   4   10.36    0.15 
   0   8   4    9.66    0.12 
   0   8  -4   10.16    0.16 
   0   8  -4   11.30    0.26 
   0  -8   4   11.36    0.24 
   0  -8   4   10.15    0.19 
   0  -8  -4   11.86    0.34 
   0  -8  -4    9.64    0.14 
   0   8   5    0.34    0.11 
   0   8  -5    0.37    0.26 
   0   8   5    0.75    0.37 
   0   8  -5    0.64    0.34 
   0   8  -5    0.36    0.13 
   0   8   5    0.90    0.35 
   0  -8  -5    0.45    0.14 
   0  -8   5    0.83    0.18 
   0  -8  -5    0.32    0.33 
   0  -8  -5    0.94    0.36 
   0  -8   5    1.07    0.49 
   0   8  -6    8.54    0.15 
   0   8  -6   10.25    0.55 
   0   8  -6    8.77    0.26 
   0   8   6    9.10    0.54 
   0   8   6    8.35    0.13 
   0  -8  -6    8.35    0.16 
   0  -8  -6    9.37    0.50 
   0  -8   6    8.80    0.18 
   0  -8   6    8.39    0.11 
   0  -8  -6    8.72    0.36 
   0  -8   6    9.05    0.54 
   0   8  -7   11.52    0.15 
   0   8   7   10.91    0.15 
   0   8  -7   14.01    0.62 
   0   8  -7   12.00    0.29 
   0   8   7   13.71    0.64 
   0  -8  -7   10.97    0.19 
   0  -8   7   11.09    0.12 
   0  -8  -7   13.62    0.50 
   0  -8   7   14.00    0.65 
   0  -8  -7   12.82    0.40 
   0  -8   7   11.22    0.19 
   0   8   8    6.40    0.65 
   0   8  -8    5.67    0.30 
   0   8  -8    6.12    0.62 
   0  -8  -8    5.55    0.59 
   0  -8  -8    5.75    0.41 
   0  -8   8    4.69    0.18 
   0  -8   8    5.57    0.64 
   0   8  -9    2.67    0.14 
   0   8   9    2.20    0.65 
   0   8  -9    2.63    0.34 
   0   8  -9    2.64    0.72 
   0  -8   9    2.39    0.20 
   0  -8   9    2.75    0.15 
   0  -8   9    1.75    0.66 
   0  -8  -9    2.52    0.23 
   0   8 -10    6.14    0.15 
   0   8  10    6.55    0.77 
   0   8 -10    6.87    0.39 
   0  -8  10    6.49    0.23 
   0  -8  10    6.39    0.17 
   0  -8  10    6.52    0.75 
   0  -8 -10    6.33    0.28 
   0   8  11    4.13    0.82 
   0   8 -11    2.89    0.36 
   0   8 -11    2.84    0.15 
   0  -8 -11    1.95    0.22 
   0  -8  11    1.84    0.79 
   0  -8  11    2.38    0.18 
   0  -8  11    2.14    0.23 
   0   8 -12    6.38    0.18 
   0   8  12    6.88    0.92 
   0   8 -12    6.56    0.44 
   0  -8  12    6.22    0.68 
   0  -8  12    6.33    0.25 
   0  -8 -12    5.91    0.34 
   0   8  13    0.43    0.17 
   0   8  13    0.09    0.95 
   0   8 -13    0.80    0.48 
   0  -8  13   -0.27    0.23 
   0  -8 -13   -0.35    0.36 
   0  -8  13   -0.12    0.69 
   0   8 -14    0.40    0.48 
   0   8  14   -0.09    1.01 
   0  -8 -14   -0.31    0.37 
   0  -8  14   -0.60    0.25 
   0  -8  14   -0.78    0.71 
   0   8  15    2.17    1.09 
   0   8 -15    2.08    0.53 
   0  -8 -15    0.83    0.41 
   0  -8  15    1.59    1.03 
   0   8  16    0.45    0.87 
   0  -8  16    0.79    1.12 
   0  -8 -16    0.26    0.42 
   0   9   0    0.08    0.33 
   0   9   0    0.18    0.23 
   0   9   0   -0.05    0.05 
   0   9   0    0.27    0.36 
   0   9   0   -0.04    0.09 
   0  -9   0    0.06    0.11 
   0  -9   0    0.09    0.06 
   0  -9   0    0.40    0.35 
   0  -9   0   -0.06    0.20 
   0   9   1  129.28    1.17 
   0   9   1  131.38    1.25 
   0   9   1  129.40    1.20 
   0   9  -1  130.16    1.21 
   0   9  -1  130.20    1.17 
   0   9  -1  131.06    1.00 
   0   9   1  131.67    1.17 
   0   9  -1  131.32    1.21 
   0   9   1  131.12    1.11 
   0  -9  -1  129.51    1.12 
   0  -9  -1  130.90    1.18 
   0  -9   1  130.76    1.01 
   0  -9   1  130.18    1.21 
   0  -9  -1  131.76    1.15 
   0  -9   1  129.58    1.14 
   0  -9   1  130.49    1.29 
   0   9  -2    4.75    0.38 
   0   9   2    4.70    0.28 
   0   9  -2    4.54    0.23 
   0   9   2    4.61    0.36 
   0   9  -2    3.87    0.14 
   0   9   2    5.05    0.43 
   0   9   2    3.82    0.13 
   0  -9   2    3.84    0.16 
   0  -9   2    4.32    0.21 
   0  -9  -2    5.16    0.40 
   0  -9   2    4.75    0.33 
   0  -9  -2    4.17    0.19 
   0   9   3   25.66    0.37 
   0   9   3   26.82    0.52 
   0   9  -3   28.70    0.52 
   0   9  -3   27.41    0.50 
   0  -9  -3   27.08    0.50 
   0  -9   3   26.58    0.44 
   0  -9   3   25.99    0.28 
   0  -9  -3   26.04    0.31 
   0   9  -4   32.33    0.62 
   0   9   4   32.49    0.55 
   0   9   4   32.48    0.58 
   0   9   4   32.94    0.63 
   0   9  -4   31.98    0.57 
   0   9  -4   31.98    0.51 
   0  -9  -4   32.35    0.60 
   0  -9   4   32.40    0.57 
   0  -9   4   32.25    0.63 
   0   9  -5  135.30    1.30 
   0   9   5  133.85    1.28 
   0   9  -5  134.24    1.31 
   0   9   5  132.73    1.36 
   0   9  -5  135.58    1.34 
   0   9   5  133.88    1.45 
   0   9   5  134.35    1.44 
   0  -9  -5  136.44    1.36 
   0  -9   5  133.86    1.44 
   0  -9  -5  137.22    1.67 
   0  -9   5  134.69    1.46 
   0  -9  -5  134.92    1.49 
   0   9   6    4.17    0.11 
   0   9  -6    4.98    0.30 
   0   9  -6    4.23    0.15 
   0   9  -6    5.34    0.53 
   0   9   6    5.50    0.58 
   0   9   6    4.44    0.14 
   0  -9  -6    5.53    0.42 
   0  -9  -6    5.33    0.42 
   0  -9   6    4.69    0.20 
   0  -9   6    5.01    0.54 
   0  -9  -6    4.22    0.13 
   0   9   7    1.97    0.57 
   0   9   7    1.34    0.12 
   0   9  -7    1.95    0.55 
   0   9  -7    1.42    0.29 
   0   9  -7    1.48    0.13 
   0  -9   7    1.82    0.44 
   0  -9   7    1.64    0.11 
   0  -9   7    1.39    0.18 
   0  -9  -7    1.45    0.37 
   0  -9  -7    1.59    0.51 
   0  -9  -7    1.58    0.17 
   0   9  -8    0.02    0.56 
   0   9  -8   -0.19    0.32 
   0   9  -8    0.21    0.14 
   0   9   8    0.81    0.50 
   0  -9  -8   -0.27    0.19 
   0  -9   8    0.21    0.12 
   0  -9   8   -0.14    0.18 
   0  -9   8    0.13    0.62 
   0  -9  -8   -0.28    0.42 
   0   9  -9    1.62    0.31 
   0   9  -9    1.94    0.15 
   0   9   9    2.60    0.57 
   0  -9   9    2.38    0.55 
   0  -9  -9    1.75    0.18 
   0  -9   9    1.44    0.22 
   0  -9   9    1.78    0.14 
   0   9 -10    5.20    0.17 
   0   9  10    6.81    0.78 
   0   9 -10    5.34    0.39 
   0  -9  10    5.70    0.59 
   0  -9  10    5.61    0.17 
   0  -9  10    5.37    0.24 
   0   9 -11    0.89    0.19 
   0   9  11    1.68    0.86 
   0   9 -11    1.13    0.38 
   0  -9 -11    0.43    0.33 
   0  -9  11    0.25    0.24 
   0  -9  11    0.46    0.17 
   0  -9  11    0.92    0.83 
   0   9  12    1.90    0.91 
   0   9 -12    1.22    0.45 
   0   9 -12    1.46    0.19 
   0  -9 -12    1.52    0.35 
   0  -9  12    1.58    0.70 
   0  -9  12    1.49    0.27 
   0   9 -13    5.76    0.48 
   0   9  13    5.99    0.18 
   0   9  13    6.25    0.96 
   0  -9 -13    4.69    0.36 
   0  -9  13    4.85    0.25 
   0  -9  13    6.61    0.95 
   0   9 -14    0.74    0.50 
   0   9  14    0.78    0.98 
   0  -9  14    1.43    0.99 
   0  -9  14   -0.20    0.26 
   0  -9 -14    0.32    0.40 
   0   9  15    4.68    1.08 
   0   9 -15    5.33    0.57 
   0  -9 -15    3.76    0.42 
   0  -9  15    4.55    0.82 
   0   9  16    0.19    1.15 
   0  -9  16   -0.23    1.10 
   0  -9 -16   -0.39    0.47 
   0  10   0   71.56    0.96 
   0  10   0   73.02    0.93 
   0  10   0   70.51    0.73 
   0  10   0   70.90    0.93 
   0  10   0   69.50    0.85 
   0 -10   0   72.20    0.90 
   0 -10   0   71.40    1.01 
   0 -10   0   71.38    0.80 
   0 -10   0   73.09    0.95 
   0  10   1   10.18    0.07 
   0  10   1   11.59    0.35 
   0  10  -1   10.04    0.06 
   0  10   1   10.43    0.15 
   0  10   1   11.44    0.40 
   0  10  -1   11.75    0.41 
   0  10   1   10.77    0.29 
   0  10  -1   10.82    0.26 
   0  10  -1   10.37    0.12 
   0 -10  -1   10.25    0.15 
   0 -10  -1   10.71    0.21 
   0 -10   1   10.67    0.24 
   0 -10   1   10.17    0.07 
   0 -10  -1   10.17    0.08 
   0 -10   1   10.73    0.19 
   0 -10   1   11.48    0.35 
   0  10   2   42.46    0.77 
   0  10   2   41.76    0.81 
   0  10  -2   41.79    0.62 
   0  10   2   42.43    0.79 
   0  10  -2   41.50    0.65 
   0  10   2   42.34    0.73 
   0  10  -2   41.56    0.76 
   0  10   2   40.99    0.63 
   0 -10   2   42.32    0.52 
   0 -10  -2   42.36    0.75 
   0 -10   2   41.97    0.86 
   0 -10  -2   42.55    0.75 
   0 -10   2   42.02    0.66 
   0 -10  -2   40.97    0.73 
   0 -10   2   41.66    0.67 
   0  10   3   17.27    0.42 
   0  10  -3   16.74    0.28 
   0  10  -3   15.91    0.17 
   0  10   3   17.06    0.36 
   0  10   3   15.98    0.17 
   0  10   3   15.74    0.11 
   0  10  -3   17.45    0.47 
   0 -10   3   16.52    0.25 
   0 -10  -3   15.80    0.13 
   0 -10   3   17.67    0.51 
   0 -10  -3   17.66    0.48 
   0 -10  -3   16.82    0.32 
   0 -10   3   16.14    0.17 
   0 -10   3   15.60    0.07 
   0  10   4   35.61    0.77 
   0  10  -4   35.05    0.68 
   0  10  -4   35.49    0.59 
   0  10  -4   34.96    0.63 
   0  10   4   35.63    0.70 
   0  10   4   36.98    0.71 
   0  10   4   34.89    0.66 
   0 -10   4   35.05    0.73 
   0 -10   4   35.20    0.56 
   0 -10  -4   35.69    0.71 
   0  10   5   73.69    1.03 
   0  10  -5   73.96    0.87 
   0  10   5   73.88    0.88 
   0  10   5   75.34    1.08 
   0  10  -5   74.41    0.98 
   0  10  -5   72.87    0.78 
   0  10   5   74.05    0.99 
   0 -10   5   76.00    1.10 
   0 -10  -5   75.52    0.98 
   0 -10  -5   73.94    1.04 
   0 -10   5   74.01    0.89 
   0 -10   5   74.70    0.80 
   0 -10  -5   73.82    1.01 
   0  10  -6   71.88    0.85 
   0  10   6   70.87    0.88 
   0  10  -6   72.31    0.99 
   0  10   6   70.32    1.06 
   0  10  -6   71.27    0.85 
   0  10   6   71.55    1.03 
   0  10   6   72.62    0.84 
   0 -10  -6   71.47    1.08 
   0 -10   6   70.62    1.02 
   0 -10  -6   71.72    0.99 
   0 -10  -6   70.12    1.21 
   0 -10   6   71.16    0.88 
   0  10  -7   87.17    0.98 
   0  10   7   86.75    0.92 
   0  10  -7   86.00    0.94 
   0  10  -7   87.13    1.14 
   0  10   7   87.64    1.20 
   0 -10  -7   87.99    1.14 
   0 -10  -7   85.28    1.17 
   0 -10   7   86.95    1.07 
   0 -10   7   83.99    1.11 
   0 -10  -7   83.90    1.36 
   0 -10   7   86.26    1.19 
   0  10  -8    2.20    0.33 
   0  10  -8    2.70    0.60 
   0  10   8    3.17    0.68 
   0  10  -8    1.84    0.15 
   0  10   8    2.34    0.15 
   0 -10   8    1.99    0.12 
   0 -10   8    1.76    0.23 
   0 -10   8    2.05    0.65 
   0 -10  -8    1.74    0.21 
   0  10  -9    0.31    0.16 
   0  10  -9    0.22    0.33 
   0  10   9    0.60    0.73 
   0 -10   9   -0.34    0.23 
   0 -10  -9   -0.29    0.24 
   0 -10   9    0.10    0.13 
   0 -10   9    0.09    0.70 
   0  10  10    5.48    0.81 
   0  10 -10    4.56    0.18 
   0  10 -10    5.54    0.41 
   0 -10  10    4.59    0.26 
   0 -10  10    4.43    0.16 
   0 -10  10    4.59    0.77 
   0 -10 -10    4.83    0.30 
   0  10 -11    5.66    0.42 
   0  10  11    6.56    0.85 
   0  10 -11    5.26    0.20 
   0 -10  11    5.41    0.27 
   0 -10  11    4.95    0.17 
   0 -10 -11    5.12    0.26 
   0 -10  11    4.59    0.83 
   0  10 -12    8.73    0.48 
   0  10  12    9.36    0.97 
   0 -10  12    9.57    0.75 
   0 -10  12    7.71    0.28 
   0 -10 -12    8.22    0.39 
   0  10 -13    3.94    0.44 
   0  10  13    5.28    1.02 
   0 -10 -13    3.49    0.39 
   0 -10  13    3.98    0.28 
   0 -10  13    5.08    0.98 
   0  10  14    2.54    1.05 
   0  10 -14    1.96    0.50 
   0 -10  14    0.38    0.97 
   0 -10 -14    0.79    0.39 
   0 -10  14    1.25    0.27 
   0  10  15    1.18    1.12 
   0  10 -15    0.52    0.52 
   0 -10 -15    0.08    0.45 
   0 -10  15    2.03    1.12 
   0  10  16    1.31    1.20 
   0 -10  16   -0.01    1.12 
   0  11   0   -0.01    0.30 
   0  11   0   -0.05    0.21 
   0  11   0   -0.08    0.11 
   0  11   0   -0.03    0.06 
   0  11   0   -0.22    0.42 
   0 -11   0    0.01    0.18 
   0 -11   0    0.15    0.42 
   0 -11   0    0.02    0.07 
   0 -11   0   -0.16    0.16 
   0  11   1    3.58    0.08 
   0  11   1    4.12    0.32 
   0  11   1    4.47    0.36 
   0  11  -1    3.58    0.06 
   0  11  -1    4.21    0.42 
   0  11   1    3.67    0.15 
   0  11  -1    3.99    0.16 
   0  11   1    4.43    0.34 
   0  11  -1    4.35    0.29 
   0 -11  -1    3.96    0.27 
   0 -11   1    3.65    0.07 
   0 -11  -1    3.73    0.10 
   0 -11   1    4.83    0.46 
   0 -11   1    3.72    0.18 
   0 -11   1    4.41    0.26 
   0 -11  -1    3.65    0.18 
   0  11  -2    0.58    0.17 
   0  11   2    1.01    0.38 
   0  11   2    0.16    0.16 
   0  11   2    0.27    0.40 
   0  11  -2    0.68    0.43 
   0  11   2    0.22    0.08 
   0  11  -2    0.91    0.29 
   0  11   2    0.71    0.26 
   0 -11   2    0.51    0.20 
   0 -11  -2    0.85    0.35 
   0 -11  -2    0.47    0.23 
   0 -11  -2    0.44    0.11 
   0 -11   2    0.65    0.24 
   0 -11   2    0.22    0.06 
   0 -11   2    0.81    0.46 
   0  11  -3   77.72    0.82 
   0  11  -3   78.68    0.94 
   0  11   3   79.04    0.89 
   0  11   3   78.68    0.94 
   0  11   3   77.18    0.86 
   0  11  -3   78.48    0.88 
   0  11   3   80.09    1.07 
   0 -11  -3   78.52    0.93 
   0 -11   3   79.49    0.84 
   0 -11   3   78.68    0.68 
   0 -11   3   78.55    0.98 
   0 -11   3   80.25    1.10 
   0 -11  -3   79.75    1.02 
   0 -11  -3   79.60    0.98 
   0  11  -4   41.26    0.81 
   0  11   4   41.72    0.92 
   0  11   4   39.84    0.84 
   0  11   4   39.84    0.75 
   0  11  -4   39.45    0.76 
   0  11  -4   40.54    0.71 
   0  11   4   41.14    0.78 
   0 -11   4   40.08    0.64 
   0 -11   4   38.79    0.68 
   0 -11  -4   40.40    0.79 
   0 -11   4   41.73    0.94 
   0 -11  -4   40.64    0.84 
   0 -11  -4   40.10    0.91 
   0  11   5    5.26    0.12 
   0  11  -5    5.80    0.29 
   0  11   5    6.76    0.57 
   0  11  -5    5.49    0.17 
   0  11  -5    6.54    0.52 
   0  11   5    5.52    0.29 
   0  11   5    5.52    0.16 
   0 -11  -5    5.39    0.15 
   0 -11   5    5.50    0.20 
   0 -11   5    5.62    0.24 
   0 -11  -5    6.25    0.36 
   0 -11   5    6.19    0.56 
   0 -11  -5    6.86    0.52 
   0  11  -6    8.36    0.31 
   0  11   6    8.28    0.10 
   0  11   6    8.29    0.39 
   0  11  -6    8.17    0.16 
   0  11   6    9.48    0.61 
   0  11  -6    9.20    0.54 
   0  11   6    8.29    0.15 
   0 -11   6    8.58    0.58 
   0 -11  -6    9.00    0.42 
   0 -11  -6    8.08    0.36 
   0 -11   6    8.15    0.20 
   0 -11  -6    8.10    0.12 
   0  11  -7    1.06    0.46 
   0  11   7    1.08    0.64 
   0  11  -7    0.63    0.16 
   0  11   7    0.79    0.15 
   0  11  -7    0.75    0.30 
   0 -11   7    0.34    0.21 
   0 -11  -7    1.83    0.67 
   0 -11   7    0.71    0.11 
   0 -11   7    1.21    0.50 
   0 -11  -7    0.26    0.18 
   0  11   8   56.78    0.82 
   0  11  -8   55.88    0.83 
   0  11  -8   58.17    1.00 
   0  11   8   57.87    1.14 
   0 -11   8   56.50    0.95 
   0 -11   8   57.46    1.00 
   0 -11   8   55.73    1.06 
   0  11  -9    8.89    0.18 
   0  11   9   10.22    0.62 
   0  11   9    9.01    0.20 
   0  11  -9    9.24    0.36 
   0 -11   9    9.02    0.26 
   0 -11  -9    8.80    0.20 
   0 -11   9   10.66    0.77 
   0 -11   9    9.37    0.16 
   0  11  10    2.30    0.79 
   0  11 -10    1.88    0.18 
   0  11 -10    2.45    0.42 
   0  11  10    2.45    0.19 
   0 -11  10    1.73    0.79 
   0 -11  10    1.93    0.15 
   0 -11  10    1.42    0.24 
   0 -11 -10    1.80    0.29 
   0  11  11    4.10    0.90 
   0  11  11    4.01    0.20 
   0  11 -11    3.72    0.45 
   0 -11 -11    3.46    0.35 
   0 -11  11    3.39    0.29 
   0 -11  11    3.13    0.86 
   0 -11  11    3.39    0.17 
   0  11 -12    1.70    0.44 
   0  11  12    2.21    0.75 
   0 -11 -12    0.77    0.37 
   0 -11  12    0.28    0.85 
   0 -11  12    1.07    0.29 
   0  11  13    0.46    1.00 
   0  11 -13    0.09    0.51 
   0 -11 -13   -0.12    0.39 
   0 -11  13    0.90    0.98 
   0 -11  13   -0.59    0.28 
   0  11 -14   10.92    0.54 
   0  11  14   11.80    1.11 
   0 -11  14   11.31    1.05 
   0 -11  14    9.98    0.28 
   0 -11 -14    9.87    0.43 
   0  11  15   -0.84    1.11 
   0 -11 -15   -0.29    0.45 
   0 -11  15   -2.25    1.01 
   0  11  16    1.56    1.23 
   0 -11  16   -0.17    1.12 
   0  12   0   66.10    0.96 
   0  12   0   64.27    0.94 
   0  12   0   66.20    0.72 
   0  12   0   65.43    0.96 
   0  12   0   64.69    0.89 
   0 -12   0   65.77    0.80 
   0 -12   0   65.75    1.03 
   0 -12   0   65.04    0.88 
   0 -12   0   65.86    0.85 
   0  12  -1   58.71    0.90 
   0  12  -1   58.56    0.62 
   0  12   1   58.97    0.76 
   0  12  -1   58.89    0.89 
   0  12   1   58.76    0.78 
   0  12  -1   59.27    0.87 
   0  12   1   58.49    0.68 
   0  12   1   59.68    0.95 
   0  12   1   59.15    0.79 
   0 -12   1   59.42    0.83 
   0 -12   1   59.23    0.87 
   0 -12   1   59.09    0.67 
   0 -12  -1   59.91    0.88 
   0 -12  -1   56.77    0.80 
   0 -12  -1   58.87    0.78 
   0 -12   1   57.47    0.89 
   0  12  -2    4.91    0.33 
   0  12   2    3.75    0.18 
   0  12   2    4.78    0.30 
   0  12   2    5.81    0.48 
   0  12   2    5.08    0.54 
   0  12  -2    5.67    0.42 
   0  12  -2    4.05    0.19 
   0 -12   2    4.03    0.22 
   0 -12  -2    4.73    0.33 
   0 -12   2    4.79    0.28 
   0 -12  -2    5.39    0.50 
   0 -12   2    5.37    0.52 
   0  12  -3   36.46    0.78 
   0  12   3   35.95    0.76 
   0  12   3   36.94    0.65 
   0  12  -3   36.70    0.73 
   0  12  -3   35.85    0.74 
   0  12   3   36.62    0.67 
   0  12   3   36.47    0.72 
   0  12   3   35.62    0.81 
   0 -12   3   36.34    0.65 
   0 -12  -3   36.55    0.91 
   0 -12  -3   35.69    0.63 
   0 -12   3   35.84    0.49 
   0 -12  -3   37.66    0.78 
   0 -12   3   36.14    0.80 
   0 -12   3   38.20    0.95 
   0  12   4    4.30    0.53 
   0  12  -4    4.79    0.17 
   0  12   4    5.28    0.38 
   0  12   4    4.85    0.16 
   0  12  -4    4.92    0.29 
   0  12   4    4.62    0.10 
   0  12  -4    4.72    0.49 
   0 -12  -4    4.67    0.13 
   0 -12  -4    4.86    0.26 
   0 -12   4    4.90    0.52 
   0 -12  -4    5.00    0.49 
   0 -12   4    4.55    0.06 
   0 -12   4    4.74    0.17 
   0 -12   4    5.07    0.25 
   0  12   5   21.82    0.21 
   0  12   5   23.84    0.42 
   0  12  -5   24.81    0.66 
   0  12   5   21.28    0.14 
   0  12  -5   21.64    0.23 
   0  12  -5   22.77    0.36 
   0 -12  -5   21.03    0.19 
   0 -12  -5   22.96    0.37 
   0 -12   5   24.08    0.67 
   0 -12   5   21.71    0.26 
   0 -12   5   22.99    0.32 
   0  12   6    5.87    0.13 
   0  12  -6    7.01    0.33 
   0  12  -6    6.07    0.17 
   0  12   6    6.89    0.63 
   0  12   6    6.71    0.43 
   0  12  -6    7.42    0.58 
   0  12   6    6.28    0.17 
   0 -12  -6    6.13    0.18 
   0 -12   6    6.88    0.62 
   0 -12   6    6.51    0.23 
   0 -12  -6    7.70    0.47 
   0  12  -7    5.11    0.36 
   0  12  -7    4.65    0.18 
   0  12  -7    5.85    0.61 
   0  12   7    5.21    0.19 
   0  12   7    5.33    0.52 
   0 -12   7    4.59    0.23 
   0 -12  -7    4.77    0.19 
   0 -12   7    4.74    0.64 
   0  12   8    0.50    0.72 
   0  12  -8    0.10    0.17 
   0  12   8    0.28    0.16 
   0  12  -8    0.16    0.38 
   0 -12   8   -0.15    0.23 
   0 -12   8    0.19    0.12 
   0 -12  -8   -0.12    0.22 
   0 -12   8   -0.16    0.69 
   0  12   9    3.97    0.21 
   0  12   9    4.63    0.80 
   0  12  -9    3.83    0.42 
   0 -12   9    4.33    0.81 
   0 -12  -9    3.89    0.30 
   0 -12   9    3.26    0.29 
   0 -12   9    3.51    0.15 
   0  12  10    8.86    0.21 
   0  12  10    9.37    0.88 
   0  12 -10    9.12    0.46 
   0 -12  10    8.31    0.16 
   0 -12 -10    8.37    0.33 
   0 -12  10    8.98    0.83 
   0 -12  10    8.18    0.30 
   0  12 -11   -0.29    0.45 
   0  12  11    0.05    0.21 
   0  12  11    0.15    0.91 
   0 -12  11    0.30    0.32 
   0 -12  11   -0.78    0.85 
   0 -12 -11    0.63    0.36 
   0 -12  11    0.76    0.19 
   0  12 -12    0.20    0.50 
   0  12  12   -0.03    0.91 
   0 -12  12   -0.31    0.29 
   0 -12 -12   -0.30    0.37 
   0 -12  12   -0.93    0.87 
   0  12 -13    6.97    0.48 
   0  12  13    7.73    1.06 
   0 -12  13    6.14    0.27 
   0 -12 -13    5.09    0.40 
   0 -12  13    6.38    0.99 
   0  12  14    4.56    1.13 
   0  12 -14    4.24    0.55 
   0 -12  14    4.54    0.85 
   0 -12 -14    2.92    0.33 
   0 -12  14    3.62    0.29 
   0  12  15   -1.67    1.12 
   0 -12 -15   -0.55    0.48 
   0 -12  15   -1.24    0.80 
   0  13   0    0.25    0.44 
   0  13   0   -0.16    0.32 
   0  13   0   -0.04    0.17 
   0  13   0    0.45    0.49 
   0  13   0    0.03    0.07 
   0 -13   0    0.00    0.09 
   0 -13   0   -0.06    0.28 
   0 -13   0    0.44    0.48 
   0 -13   0   -0.04    0.19 
   0  13  -1    0.49    0.06 
   0  13   1    0.77    0.35 
   0  13  -1    1.06    0.33 
   0  13  -1    0.84    0.46 
   0  13   1    0.68    0.33 
   0  13   1    0.72    0.50 
   0  13   1    0.57    0.08 
   0  13   1    0.65    0.14 
   0  13  -1    0.59    0.13 
   0 -13   1    0.66    0.16 
   0 -13   1    0.80    0.22 
   0 -13   1    0.48    0.08 
   0 -13  -1    0.50    0.29 
   0 -13  -1    0.52    0.10 
   0 -13   1    0.92    0.51 
   0  13  -2  136.01    1.45 
   0  13   2  133.63    1.42 
   0  13  -2  136.47    1.45 
   0  13   2  133.79    1.36 
   0  13   2  137.29    1.30 
   0  13   2  136.98    1.51 
   0  13  -2  133.88    1.30 
   0  13   2  137.07    1.42 
   0 -13   2  133.04    1.43 
   0 -13  -2  134.57    1.43 
   0 -13   2  136.36    1.62 
   0 -13   2  134.92    1.14 
   0 -13  -2  135.64    1.48 
   0 -13   2  135.85    1.34 
   0  13  -3    3.70    0.31 
   0  13   3    4.07    0.56 
   0  13   3    3.52    0.18 
   0  13   3    3.46    0.48 
   0  13   3    4.20    0.39 
   0  13  -3    4.06    0.40 
   0  13  -3    3.30    0.18 
   0  13   3    3.17    0.10 
   0 -13   3    3.29    0.22 
   0 -13   3    3.86    0.27 
   0 -13  -3    3.13    0.13 
   0 -13   3    3.74    0.41 
   0 -13  -3    3.24    0.33 
   0 -13  -3    4.01    0.51 
   0 -13   3    3.18    0.07 
   0  13   4    4.84    0.16 
   0  13   4    4.72    0.11 
   0  13   4    5.62    0.40 
   0  13  -4    4.78    0.18 
   0  13  -4    5.00    0.30 
   0  13   4    5.36    0.58 
   0  13  -4    5.73    0.43 
   0 -13  -4    5.50    0.52 
   0 -13   4    5.08    0.26 
   0 -13   4    4.98    0.43 
   0 -13   4    4.83    0.22 
   0 -13  -4    4.63    0.14 
   0 -13  -4    4.51    0.33 
   0 -13   4    4.81    0.07 
   0  13  -5   19.74    0.19 
   0  13   5   19.20    0.15 
   0  13   5   20.84    0.48 
   0  13   5   20.16    0.22 
   0  13  -5   23.00    0.67 
   0  13  -5   21.72    0.41 
   0 -13   5   21.74    0.36 
   0 -13   5   19.99    0.27 
   0 -13  -5   19.22    0.20 
   0 -13   5   23.31    0.72 
   0  13   6   14.23    0.58 
   0  13  -6   14.37    0.65 
   0  13  -6   13.95    0.39 
   0  13   6   13.01    0.46 
   0 -13   6   14.35    0.69 
   0 -13   6   13.80    0.33 
   0  13   7    7.34    0.73 
   0  13   7    5.69    0.19 
   0  13  -7    6.09    0.36 
   0  13   7    6.68    0.48 
   0  13  -7    5.62    0.23 
   0 -13  -7    5.46    0.21 
   0 -13   7    6.51    0.70 
   0 -13   7    5.64    0.25 
   0  13  -8    1.54    0.37 
   0  13   8    0.84    0.73 
   0  13   8    1.46    0.22 
   0 -13   8    1.14    0.72 
   0 -13   8    1.28    0.27 
   0 -13  -8    1.59    0.25 
   0 -13   8    1.75    0.14 
   0  13  -9   -0.10    0.43 
   0  13   9    0.36    0.19 
   0  13   9   -0.70    0.78 
   0 -13   9   -0.16    0.27 
   0 -13   9    0.09    0.13 
   0 -13  -9   -0.22    0.28 
   0 -13   9    0.59    0.82 
   0  13 -10    8.60    0.45 
   0  13  10    7.74    0.20 
   0  13  10    7.91    0.89 
   0 -13  10    8.27    0.90 
   0 -13  10    7.71    0.29 
   0 -13  10    7.16    0.15 
   0 -13 -10    7.17    0.33 
   0  13 -11   -0.08    0.46 
   0  13  11    0.51    0.23 
   0  13  11    1.72    0.96 
   0 -13  11    0.10    0.17 
   0 -13 -11    1.11    0.37 
   0 -13  11   -1.01    0.87 
   0 -13  11    0.05    0.28 
   0  13  12    0.70    0.98 
   0  13 -12   -0.61    0.43 
   0 -13 -12   -0.66    0.39 
   0 -13  12   -0.09    0.31 
   0 -13  12   -0.07    0.98 
   0  13 -13    0.50    0.55 
   0  13  13    1.08    0.82 
   0 -13  13    0.05    0.30 
   0 -13  13   -0.03    0.93 
   0 -13 -13   -0.57    0.30 
   0  13 -14    5.20    0.56 
   0  13  14    6.35    1.15 
   0 -13  14    5.33    0.32 
   0 -13  14    4.81    1.04 
   0 -13 -14    4.51    0.45 
   0  13  15   -0.04    1.18 
   0 -13 -15   -0.36    0.77 
   0 -13  15   -0.55    1.11 
   0  14   0   16.13    0.10 
   0  14   0   18.46    0.55 
   0  14   0   16.46    0.18 
   0  14   0   18.35    0.60 
   0  14   0   17.92    0.35 
   0 -14   0   17.50    0.31 
   0 -14   0   16.14    0.12 
   0 -14   0   18.99    0.60 
   0 -14   0   16.74    0.21 
   0  14  -1    0.80    0.17 
   0  14   1    0.88    0.18 
   0  14  -1    0.88    0.47 
   0  14   1    0.94    0.08 
   0  14  -1    1.06    0.34 
   0  14   1    0.95    0.36 
   0  14   1    1.37    0.53 
   0  14  -1    0.97    0.52 
   0  14   1    1.13    0.36 
   0 -14  -1    0.92    0.11 
   0 -14   1    1.10    0.21 
   0 -14   1    0.94    0.08 
   0 -14  -1    1.18    0.23 
   0 -14   1    1.15    0.29 
   0 -14   1    1.26    0.53 
   0  14   2   10.48    0.31 
   0  14  -2    9.85    0.15 
   0  14   2   11.26    0.53 
   0  14   2    9.93    0.10 
   0  14  -2   11.32    0.53 
   0  14   2   11.60    0.59 
   0  14  -2   11.01    0.35 
   0  14   2   10.26    0.19 
   0 -14   2   11.06    0.31 
   0 -14   2    9.88    0.08 
   0 -14   2   10.19    0.23 
   0 -14   2   11.83    0.48 
   0 -14  -2   10.29    0.35 
   0 -14  -2    9.94    0.12 
   0  14   3    6.01    0.61 
   0  14  -3    5.99    0.55 
   0  14   3    4.96    0.15 
   0  14  -3    5.22    0.35 
   0  14   3    4.98    0.40 
   0  14   3    4.57    0.11 
   0  14  -3    4.61    0.19 
   0  14   3    5.63    0.52 
   0 -14  -3    4.59    0.14 
   0 -14  -3    6.28    0.45 
   0 -14   3    5.63    0.58 
   0 -14   3    4.94    0.29 
   0 -14   3    4.87    0.24 
   0 -14  -3    4.49    0.35 
   0 -14   3    4.47    0.08 
   0  14   4   14.75    0.21 
   0  14  -4   17.00    0.62 
   0  14  -4   15.53    0.37 
   0  14   4   15.37    0.37 
   0  14   4   16.88    0.67 
   0  14  -4   14.44    0.22 
   0  14   4   16.81    0.62 
   0  14   4   14.25    0.14 
   0 -14  -4   17.54    0.64 
   0 -14   4   14.29    0.10 
   0 -14   4   17.59    0.58 
   0 -14   4   14.98    0.28 
   0 -14  -4   14.28    0.17 
   0  14   5   18.52    0.41 
   0  14   5   20.86    0.65 
   0  14  -5   20.19    0.68 
   0  14  -5   18.51    0.39 
   0 -14   5   19.70    0.71 
   0 -14   5   19.15    0.38 
   0  14  -6   40.67    1.04 
   0  14  -6   35.95    0.49 
   0  14   6   36.01    0.60 
   0 -14   6   39.41    0.90 
   0 -14   6   33.49    0.34 
   0  14   7   19.02    0.25 
   0  14   7   20.41    0.54 
   0  14   7   21.70    0.82 
   0  14  -7   20.92    0.48 
   0 -14   7   18.93    0.30 
   0 -14   7   20.78    0.79 
   0 -14  -7   18.48    0.24 
   0  14   8    0.34    0.20 
   0  14   8    0.34    0.78 
   0  14  -8   -0.48    0.42 
   0 -14  -8    0.08    0.24 
   0 -14   8    0.22    0.75 
   0 -14   8    0.17    0.27 
   0 -14   8    0.39    0.13 
   0  14  -9    4.41    0.45 
   0  14   9    5.03    0.86 
   0 -14   9    4.16    0.15 
   0 -14   9    4.02    0.29 
   0 -14  -9    3.86    0.29 
   0 -14   9    4.48    0.84 
   0  14 -10    0.33    0.47 
   0  14  10    1.19    0.90 
   0 -14  10    1.20    0.31 
   0 -14 -10    0.95    0.27 
   0 -14  10    0.86    0.16 
   0 -14  10   -0.14    0.86 
   0  14  11    3.91    0.75 
   0  14 -11    3.30    0.49 
   0 -14  11    3.62    0.94 
   0 -14  11    3.02    0.33 
   0 -14 -11    3.17    0.38 
   0  14 -12    0.65    0.53 
   0  14  12    1.00    1.02 
   0 -14  12    0.49    0.29 
   0 -14  12   -0.19    0.98 
   0 -14 -12    0.13    0.41 
   0  14 -13    2.04    0.54 
   0  14  13    3.26    0.85 
   0 -14 -13    1.13    0.41 
   0 -14  13    2.84    1.08 
   0 -14  13    2.42    0.34 
   0  14  14    1.44    1.17 
   0  14 -14    0.77    0.62 
   0 -14 -14    0.22    0.46 
   0 -14  14    0.48    0.36 
   0 -14  14    0.30    1.13 
   0  14  15    3.91    1.23 
   0 -14  15    3.35    1.19 
   0  15   0    0.05    0.49 
   0  15   0    0.10    0.19 
   0  15   0    0.01    0.08 
   0  15   0    0.14    0.42 
   0  15   0    0.48    0.38 
   0 -15   0   -0.06    0.10 
   0 -15   0    0.37    0.42 
   0 -15   0   -0.12    0.21 
   0 -15   0   -0.06    0.31 
   0  15   1   14.34    0.48 
   0  15   1   13.27    0.34 
   0  15   1   12.03    0.20 
   0  15  -1   14.70    0.50 
   0  15  -1   13.58    0.41 
   0  15  -1   14.42    0.63 
   0  15   1   14.56    0.62 
   0  15  -1   12.46    0.19 
   0 -15  -1   13.03    0.29 
   0 -15   1   12.47    0.24 
   0 -15  -1   12.10    0.12 
   0 -15   1   13.70    0.61 
   0 -15   1   13.17    0.35 
   0  15  -2    7.94    0.30 
   0  15   2    9.11    0.57 
   0  15   2    8.58    0.63 
   0  15   2    6.89    0.20 
   0  15   2    8.29    0.43 
   0  15  -2    8.85    0.58 
   0 -15   2    9.39    0.62 
   0 -15  -2    6.91    0.13 
   0 -15   2    7.23    0.25 
   0 -15   2    7.56    0.27 
   0  15   3    0.01    0.10 
   0  15   3   -0.20    0.44 
   0  15   3    0.57    0.51 
   0  15  -3    0.61    0.35 
   0  15  -3    0.23    0.53 
   0  15   3    0.08    0.14 
   0  15   3    0.20    0.41 
   0 -15  -3    0.05    0.13 
   0 -15   3   -0.03    0.29 
   0 -15  -3    0.42    0.61 
   0 -15   3   -0.19    0.55 
   0 -15   3    0.05    0.07 
   0 -15   3    0.24    0.24 
   0  15   4    5.15    0.19 
   0  15   4    5.74    0.43 
   0  15  -4    4.95    0.35 
   0  15   4    5.58    0.64 
   0  15   4    5.04    0.11 
   0  15  -4    5.86    0.57 
   0 -15   4    5.80    0.63 
   0 -15   4    5.26    0.30 
   0 -15   4    5.38    0.26 
   0 -15   4    5.00    0.07 
   0 -15  -4    4.89    0.15 
   0  15   5    0.16    0.19 
   0  15  -5    0.31    0.53 
   0  15   5   -0.01    0.66 
   0  15   5    0.57    0.45 
   0  15  -5    0.14    0.38 
   0 -15   5    0.26    0.08 
   0 -15   5    0.29    0.28 
   0 -15   5    0.40    0.64 
   0 -15  -5    0.22    0.17 
   0 -15   5    0.17    0.25 
   0  15   6    1.36    0.72 
   0  15  -6    0.63    0.37 
   0  15   6    1.24    0.48 
   0 -15   6    0.71    0.27 
   0 -15  -6    0.63    0.19 
   0 -15   6    1.65    0.34 
   0 -15   6    0.66    0.70 
   0 -15   6    0.70    0.08 
   0  15   7   53.88    0.97 
   0  15  -7   50.87    0.65 
   0  15   7   59.87    1.35 
   0 -15   7   54.14    1.07 
   0  15  -8    0.77    0.44 
   0  15   8    1.21    0.84 
   0 -15   8    0.30    0.76 
   0 -15   8    1.03    0.13 
   0 -15   8    0.16    0.28 
   0 -15  -8    0.39    0.23 
   0  15  -9    3.42    0.44 
   0  15   9    3.92    0.89 
   0 -15   9    3.29    0.14 
   0 -15  -9    3.25    0.24 
   0 -15   9    3.49    0.87 
   0 -15   9    2.95    0.29 
   0  15  10    4.10    0.96 
   0  15 -10    2.59    0.50 
   0 -15  10    1.98    0.86 
   0 -15 -10    3.54    0.36 
   0 -15  10    2.40    0.29 
   0  15  11    2.16    0.76 
   0  15 -11    1.63    0.53 
   0 -15  11    2.30    0.75 
   0 -15  11    1.54    0.34 
   0 -15 -11    1.72    0.39 
   0  15 -12    0.88    0.55 
   0  15  12    2.04    1.05 
   0 -15  12    0.80    0.31 
   0 -15 -12    0.68    0.32 
   0 -15  12    0.13    0.99 
   0  15  13    1.07    1.11 
   0  15 -13   -0.86    0.53 
   0 -15 -13   -0.73    0.44 
   0 -15  13   -0.37    0.35 
   0 -15  13   -1.18    1.08 
   0  15  14    0.98    1.16 
   0 -15  14    0.70    0.55 
   0 -15  14   -0.10    0.87 
   0 -15 -14    0.15    0.46 
   0  16   0  111.10    1.08 
   0  16   0  111.65    1.39 
   0  16   0  111.81    1.41 
   0  16   0  112.78    1.23 
   0 -16   0  111.40    1.21 
   0 -16   0  113.47    1.49 
   0  16   1   18.69    0.64 
   0  16   1   17.45    0.61 
   0  16   1   15.02    0.50 
   0  16  -1   19.59    0.75 
   0  16   1   17.20    0.64 
   0  16  -1   15.84    0.50 
   0  16  -1   18.09    0.77 
   0 -16   1   18.89    0.76 
   0 -16   1   15.50    0.44 
   0 -16   1   17.59    0.62 
   0  16   2   -0.02    0.42 
   0  16   2    0.11    0.10 
   0  16  -2    0.38    0.37 
   0  16   2   -0.35    0.51 
   0  16   2   -0.10    0.60 
   0  16  -2    0.23    0.54 
   0 -16   2   -0.10    0.58 
   0 -16   2    0.01    0.09 
   0 -16   2   -0.16    0.30 
   0 -16  -2    0.08    0.14 
   0 -16   2    0.01    0.24 
   0  16  -3   23.99    0.77 
   0  16  -3   21.22    0.48 
   0  16   3   23.77    0.82 
   0  16   3   20.68    0.54 
   0 -16   3   22.17    0.77 
   0 -16   3   23.30    0.55 
   0 -16   3   20.20    0.42 
   0  16   4   19.08    0.54 
   0  16   4   21.42    0.70 
   0  16  -4   19.12    0.46 
   0 -16   4   19.81    0.43 
   0 -16   4   21.21    0.67 
   0  16   5    7.32    0.61 
   0  16  -5    6.31    0.41 
   0  16   5    6.28    0.50 
   0 -16  -5    5.44    0.19 
   0 -16   5    5.92    0.29 
   0 -16   5    6.13    0.38 
   0 -16   5    5.69    0.09 
   0 -16   5    6.90    0.56 
   0  16  -6    0.89    0.42 
   0  16   6    0.10    0.74 
   0  16   6    1.16    0.52 
   0 -16   6    0.04    0.08 
   0 -16  -6    0.23    0.22 
   0 -16   6   -0.04    0.71 
   0 -16   6   -0.15    0.30 
   0  16   7    5.45    0.81 
   0  16   7    5.42    0.53 
   0  16  -7    5.15    0.42 
   0 -16   7    4.55    0.30 
   0 -16  -7    4.74    0.23 
   0 -16   7    4.87    0.09 
   0 -16   7    5.39    0.62 
   0  16  -8    2.73    0.43 
   0  16   8    3.82    0.90 
   0 -16   8    3.89    0.66 
   0 -16   8    2.72    0.13 
   0 -16  -8    2.34    0.25 
   0 -16   8    2.25    0.31 
   0  16   9    0.10    0.91 
   0  16  -9   -0.31    0.44 
   0 -16  -9   -0.10    0.23 
   0 -16   9    0.33    0.17 
   0 -16   9   -0.39    0.32 
   0 -16   9    0.34    0.88 
   0  16  10   -0.80    0.92 
   0  16 -10    0.79    0.48 
   0 -16  10    0.89    0.91 
   0 -16 -10   -0.35    0.34 
   0 -16  10   -0.20    0.36 
   0  16 -11   -0.43    0.52 
   0  16  11    1.33    1.03 
   0 -16  11   -0.06    0.32 
   0 -16  11    0.53    1.00 
   0 -16 -11   -0.76    0.38 
   0  16  12    1.47    1.05 
   0  16 -12    0.94    0.49 
   0 -16 -12    0.54    0.40 
   0 -16  12    1.14    0.32 
   0 -16  12    1.62    1.07 
   0  16 -13   -0.76    0.58 
   0  16  13   -0.97    1.11 
   0 -16 -13   -1.23    0.45 
   0 -16  13   -0.28    1.09 
   0 -16  13   -0.67    0.35 
   0  16  14    1.46    1.17 
   0 -16  14    1.61    1.21 
   0 -16 -14    1.36    0.44 
   0  17   0    0.02    0.09 
   0  17   0   -0.31    0.31 
   0  17   0    0.16    0.61 
   0 -17   0    0.06    0.18 
   0 -17   0    0.06    0.12 
   0  17  -1   30.11    0.44 
   0  17  -1   32.07    0.78 
   0  17   1   30.82    0.55 
   0  17   1   31.98    0.79 
   0 -17   1   30.59    0.75 
   0  17  -2    0.16    0.40 
   0  17   2    0.84    0.66 
   0  17   2    0.08    0.10 
   0  17   2   -0.14    0.43 
   0 -17   2    0.02    0.09 
   0 -17   2   -0.14    0.62 
   0 -17  -2   -0.09    0.14 
   0 -17   2    0.25    0.26 
   0  17   3    0.45    0.67 
   0  17  -3    0.36    0.40 
   0  17   3    0.41    0.11 
   0  17   3    0.69    0.47 
   0 -17   3    0.22    0.09 
   0 -17   3    0.92    0.66 
   0 -17  -3    0.08    0.15 
   0 -17   3    0.29    0.27 
   0  17   4   12.05    0.51 
   0  17  -4   12.30    0.44 
   0  17   4   13.73    0.80 
   0 -17   4   12.20    0.72 
   0 -17   4   11.99    0.31 
   0 -17  -4   11.33    0.18 
   0  17   5    2.16    0.53 
   0  17   5    2.09    0.78 
   0  17  -5    3.05    0.48 
   0 -17   5    1.35    0.72 
   0 -17  -5    1.39    0.20 
   0 -17   5    1.19    0.31 
   0  17   6    7.23    0.69 
   0  17   6    6.83    0.47 
   0  17  -6    6.48    0.50 
   0 -17  -6    5.37    0.23 
   0 -17   6    5.90    0.34 
   0 -17   6    7.61    0.66 
   0  17   7    1.52    0.84 
   0  17   7    1.54    0.54 
   0  17  -7    1.05    0.48 
   0 -17  -7    1.32    0.23 
   0 -17   7    1.59    0.80 
   0 -17   7    1.36    0.31 
   0 -17   7    1.59    0.09 
   0  17  -8    0.06    0.45 
   0  17   8    1.42    0.90 
   0 -17   8   -0.35    0.32 
   0 -17   8    0.20    0.13 
   0 -17  -8   -0.03    0.25 
   0 -17   8   -0.42    0.83 
   0  17   9    3.61    0.91 
   0  17  -9    3.21    0.47 
   0 -17   9    2.93    0.67 
   0 -17   9    2.89    0.33 
   0 -17  -9    3.20    0.25 
   0  17 -10   -0.45    0.48 
   0  17  10   -0.10    0.96 
   0 -17  10   -0.32    0.33 
   0 -17 -10   -0.36    0.36 
   0 -17  10   -1.63    0.92 
   0  17  11    6.53    1.09 
   0  17 -11    4.46    0.54 
   0 -17  11    4.09    1.00 
   0 -17  11    4.58    0.34 
   0 -17 -11    4.21    0.39 
   0  17 -12   -0.44    0.51 
   0  17  12    0.25    0.85 
   0 -17  12   -0.82    0.33 
   0 -17  12   -0.28    1.09 
   0 -17 -12   -0.86    0.42 
   0  17 -13   -0.88    0.62 
   0  17  13   -0.68    1.14 
   0 -17  13   -0.54    0.37 
   0 -17  13   -1.12    1.15 
   0 -17 -13   -1.05    0.45 
   0  17  14   -0.21    1.15 
   0 -17  14   -0.37    1.21 
   0  18   0  146.67    1.38 
   0  18   0  144.60    1.54 
   0  18   0  144.98    1.75 
   0 -18   0  146.76    1.57 
   0  18   1   -0.09    0.64 
   0  18   1    0.68    0.47 
   0  18   1    0.14    0.09 
   0  18  -1    0.35    0.65 
   0  18  -1    0.22    0.44 
   0 -18  -1    0.19    0.14 
   0 -18   1   -0.05    0.48 
   0 -18   1    0.21    0.11 
   0 -18   1    0.28    0.26 
   0  18   2    0.01    0.11 
   0  18   2   -0.20    0.67 
   0  18  -2    0.77    0.44 
   0  18  -2   -0.13    0.67 
   0  18   2    0.23    0.36 
   0 -18  -2   -0.11    0.14 
   0 -18   2    0.37    0.68 
   0 -18   2   -0.03    0.10 
   0 -18   2    0.19    0.21 
   0  18   3    3.85    0.11 
   0  18  -3    5.03    0.46 
   0  18   3    4.19    0.73 
   0  18   3    4.46    0.49 
   0 -18   3    3.88    0.29 
   0 -18   3    4.12    0.52 
   0 -18  -3    4.01    0.17 
   0 -18   3    3.88    0.09 
   0  18   4    0.78    0.74 
   0  18  -4    2.70    0.49 
   0  18   4    2.15    0.54 
   0 -18  -4    1.31    0.21 
   0 -18   4    1.13    0.55 
   0 -18   4    1.31    0.09 
   0 -18   4    0.93    0.30 
   0  18  -5    7.90    0.47 
   0  18   5    8.86    0.58 
   0  18   5    9.53    0.69 
   0 -18   5    7.36    0.34 
   0 -18  -5    7.20    0.21 
   0 -18   5    7.18    0.10 
   0 -18   5   10.02    0.81 
   0  18   6    6.86    0.45 
   0  18  -6    7.39    0.48 
   0  18   6    8.90    0.88 
   0 -18  -6    6.70    0.23 
   0 -18   6    6.60    0.10 
   0 -18   6    6.37    0.34 
   0 -18   6    9.19    0.87 
   0  18   7   -0.12    0.58 
   0  18  -7   -0.43    0.45 
   0  18   7   -0.29    0.66 
   0 -18   7    0.12    0.09 
   0 -18   7   -0.13    0.32 
   0 -18   7   -0.67    0.81 
   0 -18  -7   -0.15    0.24 
   0  18   8   14.64    0.51 
   0  18  -8   15.01    0.58 
   0  18   8   15.22    0.96 
   0 -18   8   13.37    0.36 
   0 -18  -8   14.31    0.31 
   0 -18   8   16.38    0.97 
   0  18  -9    1.81    0.49 
   0  18   9    2.76    0.99 
   0 -18   9    1.59    0.35 
   0 -18   9    1.38    0.91 
   0 -18  -9    1.73    0.25 
   0  18 -10    0.34    0.50 
   0  18  10    1.16    0.78 
   0 -18  10    1.84    1.01 
   0 -18 -10   -0.10    0.35 
   0 -18  10    0.58    0.36 
   0  18 -11   -0.84    0.56 
   0  18  11   -0.26    1.03 
   0 -18 -11   -0.44    0.40 
   0 -18  11   -0.72    0.99 
   0 -18  11   -0.27    0.35 
   0  18  12   -0.39    1.14 
   0  18 -12   -0.23    0.54 
   0 -18 -12   -0.82    0.42 
   0 -18  12   -1.69    1.05 
   0 -18  12   -0.64    0.35 
   0  18  13    1.90    1.17 
   0 -18 -13   -0.14    0.47 
   0 -18  13    0.43    0.36 
   0 -18  13   -0.13    1.16 
   0  19   0    0.13    0.10 
   0  19   0    0.04    0.70 
   0  19   0    1.93    0.53 
   0 -19   0    0.25    0.14 
   0  19   1    1.27    0.11 
   0  19   1    2.13    0.74 
   0  19  -1    2.47    0.58 
   0  19  -1    4.16    0.57 
   0  19   1    1.66    0.51 
   0 -19  -1    1.29    0.16 
   0 -19   1    1.69    0.70 
   0 -19   1    1.30    0.29 
   0  19   2   15.29    0.66 
   0  19  -2   16.52    0.58 
   0  19  -2   15.77    0.83 
   0  19   2   15.09    0.59 
   0 -19   2   14.76    0.79 
   0  19   3    1.49    0.41 
   0  19  -3    1.48    0.48 
   0  19   3    0.23    0.72 
   0 -19   3    0.95    0.10 
   0 -19  -3    1.00    0.17 
   0 -19   3    1.37    0.73 
   0 -19   3    1.17    0.31 
   0  19  -4   10.07    0.50 
   0  19   4    9.71    0.82 
   0  19   4    9.77    0.56 
   0 -19   4    9.56    0.11 
   0 -19   4    9.57    0.33 
   0 -19   4   11.31    0.81 
   0 -19  -4    9.33    0.20 
   0  19   5    8.35    0.82 
   0  19  -5    8.32    0.50 
   0  19   5    8.64    0.59 
   0 -19  -5    7.66    0.22 
   0 -19   5    9.50    0.85 
   0 -19   5    7.56    0.34 
   0  19  -6    1.94    0.49 
   0  19   6    2.83    0.89 
   0  19   6    2.98    0.59 
   0 -19   6    2.03    0.10 
   0 -19   6    2.51    0.65 
   0 -19   6    2.05    0.35 
   0 -19  -6    1.90    0.23 
   0  19   7   16.77    0.99 
   0  19   7   16.89    0.69 
   0  19  -7   16.87    0.60 
   0 -19  -7   15.39    0.30 
   0 -19   7   14.72    0.32 
   0 -19   7   16.72    0.92 
   0  19   8    3.51    0.65 
   0  19   8    3.35    0.99 
   0  19  -8    2.76    0.57 
   0 -19   8    2.67    0.69 
   0 -19   8    1.94    0.36 
   0 -19  -8    2.18    0.27 
   0  19   9   -0.69    0.99 
   0  19  -9   -0.58    0.50 
   0 -19   9   -0.15    0.36 
   0 -19  -9   -0.21    0.32 
   0 -19   9    0.38    0.95 
   0  19 -10   -1.02    0.57 
   0  19  10    0.40    1.07 
   0 -19  10   -0.44    0.36 
   0 -19  10    0.69    1.01 
   0 -19 -10   -0.75    0.36 
   0  19 -11   -1.58    0.59 
   0  19  11    0.00    0.82 
   0 -19 -11   -0.85    0.40 
   0 -19  11   -1.88    1.03 
   0 -19  11   -0.17    0.38 
   0  19 -12   -1.35    0.54 
   0  19  12   -1.20    1.12 
   0 -19 -12   -0.73    0.43 
   0 -19  12   -1.97    1.11 
   0 -19  12   -1.06    0.36 
   0  19  13   -0.47    1.21 
   0 -19  13   -0.10    1.18 
   0 -19  13   -0.28    0.39 
   0  20   0   -0.08    0.73 
   0  20   0   -0.03    0.10 
   0  20   0    0.67    0.51 
   0 -20   0    0.05    0.15 
   0  20   1   27.32    0.88 
   0  20  -1   26.49    0.63 
   0  20   1   25.83    0.64 
   0  20  -1   28.67    0.91 
   0 -20   1   28.65    0.91 
   0  20  -2    3.18    0.77 
   0  20  -2    3.91    0.50 
   0  20   2    4.33    0.55 
   0  20   2    4.45    0.80 
   0  20   2    3.49    0.12 
   0 -20   2    3.95    0.31 
   0 -20   2    4.95    0.79 
   0 -20   2    3.65    0.13 
   0 -20  -2    3.45    0.18 
   0  20  -3    3.38    0.50 
   0  20   3    3.83    0.80 
   0  20   3    3.88    0.58 
   0 -20   3    3.00    0.76 
   0 -20  -3    3.04    0.20 
   0 -20   3    3.20    0.11 
   0 -20   3    3.01    0.31 
   0  20   4    0.25    0.55 
   0  20  -4    0.89    0.51 
   0  20   4    0.85    0.85 
   0 -20  -4    0.26    0.20 
   0 -20   4    0.37    0.82 
   0 -20   4    0.44    0.10 
   0 -20   4    0.15    0.32 
   0  20   5    6.98    0.91 
   0  20  -5    6.00    0.55 
   0  20   5    5.82    0.63 
   0 -20   5    6.08    0.68 
   0 -20  -5    4.79    0.23 
   0 -20   5    5.13    0.36 
   0  20   6    6.41    0.65 
   0  20  -6    7.12    0.60 
   0  20   6    5.56    0.72 
   0 -20   6    5.53    0.89 
   0 -20   6    4.49    0.37 
   0 -20  -6    5.29    0.27 
   0  20  -7    0.53    0.60 
   0  20   7    1.59    0.96 
   0  20   7    1.24    0.64 
   0 -20   7    0.19    0.10 
   0 -20  -7   -0.07    0.25 
   0 -20   7    0.37    0.90 
   0 -20   7    0.57    0.29 
   0  20   8    1.76    1.00 
   0  20   8    2.48    0.67 
   0  20  -8    1.69    0.54 
   0 -20   8    3.01    0.98 
   0 -20  -8    1.50    0.31 
   0 -20   8    1.32    0.37 
   0  20  -9    3.62    0.60 
   0  20   9    4.38    0.82 
   0 -20   9    4.02    0.39 
   0 -20  -9    2.93    0.33 
   0 -20   9    3.85    0.99 
   0  20  10    0.59    1.06 
   0  20 -10   -0.76    0.61 
   0 -20  10   -0.10    0.39 
   0 -20 -10   -0.81    0.36 
   0 -20  10   -0.06    1.05 
   0  20 -11   -1.81    0.62 
   0  20  11    0.49    1.14 
   0 -20 -11   -0.84    0.42 
   0 -20  11   -0.51    1.08 
   0 -20  11   -0.64    0.38 
   0  20  12    4.06    0.98 
   0  20 -12   -0.13    0.69 
   0 -20 -12    1.47    0.45 
   0 -20  12    1.27    0.39 
   0 -20  12    1.73    1.16 
   0  21   0    0.23    0.56 
   0  21   0    0.05    0.10 
   0  21   0   -0.95    0.72 
   0 -21   0   -0.15    0.15 
   0  21  -1    0.73    0.55 
   0  21   1    0.33    0.12 
   0  21   1   -0.13    0.42 
   0  21   1    2.06    0.84 
   0  21  -1    0.79    0.80 
   0 -21  -1    0.08    0.15 
   0 -21   1    0.21    0.14 
   0  21   2   10.14    0.62 
   0  21   2    9.98    0.85 
   0  21  -2    9.31    0.83 
   0  21  -2    9.36    0.53 
   0 -21   2    8.62    0.33 
   0 -21   2   10.49    0.85 
   0  21   3    1.39    0.61 
   0  21  -3    2.06    0.52 
   0  21   3    1.44    0.58 
   0  21  -3    1.85    0.83 
   0 -21  -3    1.59    0.18 
   0 -21   3    2.07    0.32 
   0 -21   3    1.95    0.12 
   0 -21   3    2.68    0.82 
   0  21   4    9.83    0.95 
   0  21  -4    9.31    0.58 
   0  21   4    8.87    0.51 
   0 -21   4   10.39    0.89 
   0 -21   4    8.33    0.30 
   0 -21   4    7.78    0.13 
   0 -21  -4    7.92    0.23 
   0  21   5    1.84    0.65 
   0  21   5    0.83    0.90 
   0  21  -5    2.66    0.65 
   0 -21  -5    0.83    0.25 
   0 -21   5    0.72    0.10 
   0 -21   5    0.40    0.34 
   0 -21   5    1.04    0.84 
   0  21   6    1.83    0.65 
   0  21  -6    2.36    0.57 
   0  21   6    2.04    0.95 
   0 -21   6    0.96    0.38 
   0 -21   6    2.52    0.91 
   0 -21  -6    1.01    0.25 
   0  21   7    1.98    0.64 
   0  21   7    2.04    0.95 
   0  21  -7    1.91    0.58 
   0 -21   7    1.77    0.90 
   0 -21   7    1.87    0.30 
   0 -21  -7    1.37    0.27 
   0  21  -8    2.33    0.64 
   0  21   8    3.59    0.71 
   0  21   8    4.27    1.05 
   0 -21   8    1.87    0.39 
   0 -21  -8    2.29    0.30 
   0 -21   8    3.36    0.78 
   0  21   9    1.04    1.08 
   0  21  -9   -0.30    0.62 
   0 -21  -9    0.23    0.34 
   0 -21   9    0.83    0.40 
   0 -21   9    2.09    1.06 
   0  21  10    0.41    1.15 
   0  21 -10   -0.61    0.64 
   0 -21 -10   -0.24    0.30 
   0 -21  10   -0.04    1.03 
   0 -21  10    0.00    0.41 
   0  21 -11   -0.62    0.66 
   0  21  11    0.30    0.87 
   0 -21 -11   -0.65    0.42 
   0 -21  11   -1.63    1.11 
   0 -21  11    0.39    0.42 
   0  21  12    0.56    1.25 
   0 -21  12    0.82    0.42 
   0 -21 -12   -0.05    0.51 
   0 -21  12    1.02    1.24 
   0  22   0    5.82    0.61 
   0  22   0    5.91    0.86 
   0 -22   0    5.05    0.17 
   0  22   1   11.89    0.67 
   0  22   1   12.69    0.93 
   0  22  -1   11.86    0.62 
   0  22  -1   11.89    0.90 
   0  22   2    1.22    0.64 
   0  22  -2    1.66    0.49 
   0  22  -2   -0.13    0.84 
   0  22   2   -0.15    0.64 
   0 -22   2    0.21    0.83 
   0 -22  -2    0.48    0.22 
   0 -22   2    0.00    0.15 
   0  22  -3    2.27    0.89 
   0  22   3    2.23    0.90 
   0  22  -3    4.91    0.71 
   0  22   3    2.27    0.50 
   0 -22   3    1.46    0.14 
   0 -22   3    1.21    0.27 
   0 -22   3    2.35    0.87 
   0 -22  -3    1.69    0.24 
   0  22   4    2.93    0.93 
   0  22  -4    3.78    0.58 
   0  22   4    3.24    0.66 
   0 -22  -4    2.25    0.24 
   0 -22   4    2.70    0.28 
   0 -22   4    2.47    0.13 
   0 -22   4    3.76    0.89 
   0  22   5    4.35    0.98 
   0  22   5    4.21    0.68 
   0  22  -5    4.57    0.60 
   0 -22   5    3.11    0.29 
   0 -22   5    3.76    0.92 
   0  22  -6    0.13    0.58 
   0  22   6    0.18    0.63 
   0  22   6    0.14    0.97 
   0 -22  -6   -0.16    0.24 
   0 -22   6    0.45    0.91 
   0 -22   6    0.47    0.39 
   0  22  -7   -0.11    0.65 
   0  22   7    1.27    0.67 
   0  22   7    1.11    1.02 
   0 -22   7    1.18    0.98 
   0 -22   7    0.63    0.39 
   0 -22  -7   -0.08    0.27 
   0  22  -8   -0.89    0.60 
   0  22   8    0.53    0.71 
   0  22   8    0.90    1.11 
   0 -22   8    0.12    1.02 
   0 -22   8   -0.53    0.40 
   0 -22  -8   -0.31    0.32 
   0  22   9    0.96    1.13 
   0  22  -9   -0.55    0.59 
   0 -22  -9    0.36    0.35 
   0 -22   9    2.37    1.08 
   0 -22   9    0.35    0.40 
   0  22  10    1.12    0.90 
   0  22 -10   -0.65    0.61 
   0 -22 -10   -0.53    0.38 
   0 -22  10    0.75    0.43 
   0 -22  10   -0.41    1.11 
   0  22  11    0.77    1.19 
   0  22 -11   -0.27    0.62 
   0 -22 -11    0.12    0.42 
   0 -22  11    1.79    1.15 
   0 -22  11    1.64    0.44 
   0  23   0    0.17    0.86 
   0  23   0    0.26    0.48 
   0 -23   0   -0.36    0.18 
   0  23  -1    0.88    0.61 
   0  23   1    0.33    0.88 
   0  23  -1   -0.74    0.84 
   0  23   1   -0.19    0.47 
   0 -23   1    0.06    0.17 
   0 -23  -1   -0.11    0.19 
   0  23  -2    1.06    0.91 
   0  23   2    0.23    0.63 
   0  23  -2    0.94    0.62 
   0  23   2    1.05    0.93 
   0 -23  -2   -0.05    0.21 
   0 -23   2    0.70    0.87 
   0  23  -3    2.32    0.94 
   0  23   3    1.51    0.67 
   0  23   3    1.13    0.93 
   0  23  -3    2.17    0.62 
   0 -23  -3    0.62    0.23 
   0 -23   3    1.56    0.89 
   0 -23   3    1.15    0.36 
   0 -23   3    0.74    0.14 
   0  23  -4    6.84    0.78 
   0  23   4    6.59    1.01 
   0  23   4    5.61    0.71 
   0  23  -4    7.04    0.64 
   0 -23  -4    4.80    0.24 
   0 -23   4    8.01    0.81 
   0 -23   4    5.69    0.39 
   0  23  -5    9.88    0.65 
   0  23   5   10.53    1.05 
   0  23   5    8.86    0.69 
   0 -23   5   11.40    1.01 
   0 -23  -5    8.42    0.28 
   0 -23   5    9.04    0.32 
   0  23  -6    4.80    0.61 
   0  23   6    4.84    0.54 
   0  23   6    6.35    1.08 
   0 -23   6    6.63    1.02 
   0 -23  -6    4.65    0.28 
   0 -23   6    4.60    0.40 
   0  23   7    0.16    1.07 
   0  23  -7   -1.07    0.59 
   0  23   7   -0.37    0.68 
   0 -23  -7   -0.54    0.27 
   0 -23   7   -0.49    1.01 
   0 -23   7   -0.37    0.39 
   0  23  -8    0.36    0.69 
   0  23   8    1.09    0.72 
   0  23   8    1.09    1.11 
   0 -23   8    1.71    0.42 
   0 -23  -8    0.91    0.33 
   0 -23   8    0.92    1.03 
   0  23  -9   -1.09    0.71 
   0  23   9    1.13    0.88 
   0 -23   9   -0.18    1.05 
   0 -23   9    0.35    0.42 
   0 -23  -9   -0.14    0.38 
   0  23  10   -0.97    1.17 
   0  23 -10   -2.28    0.73 
   0 -23 -10   -1.03    0.39 
   0 -23  10    0.16    0.44 
   0 -23  10   -1.00    1.14 
   0  24   0    3.76    0.67 
   0  24   0    2.96    0.87 
   0 -24   0    2.99    0.18 
   0  24   1   -0.39    0.66 
   0  24   1   -0.33    0.88 
   0  24  -1   -0.38    0.70 
   0  24  -1   -0.69    0.63 
   0 -24  -1   -0.36    0.20 
   0 -24   1   -0.23    0.17 
   0  24   2    0.74    0.65 
   0  24  -2    1.11    0.90 
   0  24  -2    2.31    0.66 
   0  24   2    1.54    0.90 
   0 -24   2    1.55    0.15 
   0 -24  -2    1.60    0.23 
   0  24  -3   -0.75    0.91 
   0  24  -3   -0.02    0.62 
   0  24   3   -0.79    0.66 
   0  24   3    0.08    0.94 
   0 -24   3    1.89    0.95 
   0 -24  -3   -0.04    0.21 
   0  24  -4    1.18    0.96 
   0  24   4    0.04    0.66 
   0  24   4   -0.08    0.96 
   0  24  -4    1.12    0.63 
   0 -24   4    1.14    0.90 
   0 -24  -4   -0.20    0.25 
   0 -24   4    0.41    0.38 
   0  24   5    2.48    0.98 
   0  24  -5    2.89    0.64 
   0  24   5    3.09    0.54 
   0 -24   5    3.10    0.38 
   0 -24   5    3.04    0.95 
   0 -24  -5    2.59    0.25 
   0  24  -6    1.07    0.62 
   0  24   6    2.47    1.09 
   0  24   6    1.03    0.68 
   0 -24   6    1.88    0.41 
   0 -24   6    1.09    0.98 
   0 -24  -6    1.24    0.30 
   0  24   7    0.90    0.74 
   0  24  -7    1.00    0.68 
   0  24   7    1.40    1.13 
   0 -24  -7   -0.32    0.30 
   0 -24   7    0.25    0.42 
   0 -24   7    0.34    1.03 
   0  24   8    0.49    0.87 
   0  24  -8    0.22    0.67 
   0  24   8    1.37    0.77 
   0 -24   8    0.28    0.43 
   0 -24   8    0.28    1.06 
   0 -24  -8   -0.48    0.36 
   0  24   9    1.86    1.20 
   0  24  -9   -1.67    0.65 
   0 -24  -9   -0.65    0.37 
   0 -24   9   -1.07    1.12 
   0 -24   9    0.23    0.43 
   0 -24 -10    0.81    0.41 
   0 -24  10    0.95    1.15 
   0  25   0   -1.62    0.94 
   0  25   0   -1.07    0.67 
   0 -25   0   -0.32    0.20 
   0  25   1    2.60    0.98 
   0  25  -1    1.36    0.67 
   0  25  -1    2.00    0.94 
   0  25   1    2.13    0.69 
   0 -25  -1    1.39    0.20 
   0 -25   1    1.60    0.18 
   0  25  -2    4.76    0.98 
   0  25   2    3.95    0.98 
   0  25  -2    4.22    0.70 
   0  25   2    3.55    0.69 
   0 -25  -2    3.48    0.24 
   0  25  -3    2.17    1.00 
   0  25  -3    1.61    0.66 
   0  25   3    0.71    0.68 
   0  25   3    1.62    0.75 
   0 -25  -3    1.62    0.23 
   0 -25   3    2.68    1.00 
   0  25  -4   -0.33    0.66 
   0  25   4    0.31    0.99 
   0  25  -4    0.14    1.00 
   0  25   4   -0.69    0.70 
   0 -25   4   -0.12    0.94 
   0 -25  -4   -0.19    0.27 
   0  25   5    1.14    0.73 
   0  25  -5    2.49    0.80 
   0  25   5    2.57    1.05 
   0  25  -5    1.78    0.69 
   0 -25  -5    1.30    0.26 
   0 -25   5    2.40    0.78 
   0 -25   5    2.84    0.43 
   0  25   6   -1.20    0.72 
   0  25  -6   -0.82    0.67 
   0  25   6   -2.06    1.04 
   0 -25   6    0.11    0.32 
   0 -25  -6   -1.03    0.27 
   0 -25   6    0.86    0.82 
   0  25   7    0.51    0.78 
   0  25  -7   -0.66    0.76 
   0  25   7   -0.40    1.12 
   0 -25   7    0.22    0.44 
   0 -25  -7   -0.92    0.35 
   0 -25   7   -0.12    1.02 
   0  25  -8   -0.66    0.77 
   0  25   8   -0.34    0.88 
   0 -25   8    0.47    0.45 
   0 -25   8    0.23    1.14 
   0 -25  -8   -0.82    0.34 
   0  25   9    1.39    1.27 
   0 -25   9    0.23    1.17 
   0 -25   9   -0.28    0.44 
   0 -25  -9   -0.44    0.38 
   0  26   0    1.97    0.55 
   0  26   0    2.82    1.02 
   0 -26   0    1.60    0.22 
   0  26  -1   -0.15    0.71 
   0  26  -1    0.20    1.00 
   0  26   1    0.91    0.99 
   0  26   1   -1.13    0.69 
   0 -26  -1    0.00    0.21 
   0  26   2    0.41    1.04 
   0  26  -2   -1.25    0.69 
   0  26   2   -0.11    0.73 
   0  26  -2    0.13    0.76 
   0 -26  -2   -0.32    0.24 
   0  26   3    3.47    1.05 
   0  26  -3    2.64    0.71 
   0  26  -3    2.91    1.02 
   0  26   3    2.49    0.75 
   0 -26   3    4.34    1.03 
   0 -26  -3    2.39    0.26 
   0  26   4    7.64    1.07 
   0  26  -4   10.91    1.14 
   0  26   4    7.79    0.79 
   0  26  -4    7.22    0.72 
   0 -26   4    8.64    1.06 
   0 -26  -4    7.13    0.27 
   0  26   5    0.14    0.78 
   0  26  -5    1.33    1.08 
   0  26  -5   -0.01    0.73 
   0  26   5    1.22    1.06 
   0 -26   5    1.12    1.00 
   0 -26  -5   -0.05    0.31 
   0  26   6    0.64    1.14 
   0  26  -6   -1.13    0.71 
   0  26   6    0.02    0.79 
   0 -26   6    0.70    0.33 
   0 -26  -6   -0.45    0.28 
   0 -26   6    1.04    1.07 
   0  26   7    0.64    1.15 
   0  26  -7    0.55    0.72 
   0 -26  -7    0.79    0.33 
   0 -26   7    1.55    0.46 
   0 -26   7    2.35    1.15 
   0 -26  -8    0.45    0.37 
   0 -26   8    0.17    0.46 
   0 -26   8    2.39    1.21 
   0  27   0   -1.92    0.72 
   0  27   0   -0.11    1.00 
   0  27  -1   -0.31    0.55 
   0  27   1   -0.56    0.77 
   0  27  -1    1.20    1.07 
   0  27   1    0.28    1.05 
   0  27  -2   -0.52    1.01 
   0  27  -2   -0.06    0.75 
   0  27   2    0.46    0.82 
   0  27   2    0.82    0.79 
   0 -27  -2   -0.62    0.25 
   0  27   3    0.81    1.08 
   0  27  -3    0.42    1.10 
   0  27  -3   -1.31    0.72 
   0  27   3   -0.31    0.77 
   0 -27  -3   -0.78    0.28 
   0  27  -4    0.58    0.75 
   0  27  -4    1.72    1.11 
   0  27   4    2.99    1.15 
   0  27   4    1.16    0.63 
   0 -27   4    1.57    1.04 
   0 -27  -4    0.45    0.28 
   0  27   5    0.33    0.74 
   0  27   5    0.75    0.84 
   0  27  -5    0.29    0.83 
   0  27  -5    0.79    1.10 
   0 -27  -5    0.52    0.28 
   0 -27   5    2.47    1.08 
   0  27  -6   -0.74    0.77 
   0  27   6   -0.02    1.17 
   0 -27  -6   -0.62    0.34 
   0 -27   6    0.43    1.11 
   0  28   0    4.71    0.82 
   0  28   0    7.07    1.16 
   0  28  -1    0.87    0.81 
   0  28  -1   -0.54    0.82 
   0  28   1   -0.33    0.81 
   0  28   1   -1.64    0.75 
   0  28   2   -0.83    0.79 
   0  28  -2   -0.75    0.78 
   0  28   2    1.71    1.14 
   0  28  -2    1.32    1.12 
   0  28   3   -0.03    1.11 
   0  28   3   -0.91    0.82 
   0  28  -3    0.89    1.16 
   0  28  -3   -1.05    0.77 
   0  28  -4    0.51    1.29 
   0  28  -4    0.28    0.80 
   0  28   4    0.52    1.12 
   0 -28  -4   -0.22    0.31 
   0 -28   4    1.45    1.10 
   0  28   5   -0.72    1.31 
   0  28  -5    0.93    0.94 
   0 -28   5   -0.30    1.07 
   0 -28  -5   -0.14    0.31 
   0  29   0   -0.59    1.24 
   0  29   0   -1.78    0.80 
   0  29  -1    0.91    1.32 
   0  29   1   -0.71    0.98 
   0  29  -1   -0.90    0.84 
   0  29   1   -0.35    1.29 
   0  29  -2    0.74    0.84 
   0  29   2    1.83    1.43 
  -1   0  17    0.59    0.92 
  -1   0  16    1.61    1.09 
  -1   0  15    0.79    1.00 
  -1   0  14    2.71    0.99 
  -1   0  13   -0.19    0.15 
  -1   0  13    0.72    0.90 
  -1   0  12    6.68    0.86 
  -1   0  12    5.31    0.15 
   1   0 -12    5.09    0.21 
  -1   0  11   -0.23    0.12 
  -1   0  11   -0.24    0.71 
   1   0 -11   -0.12    0.21 
  -1   0  10   30.82    0.21 
  -1   0  10   31.60    0.16 
   1   0 -10   34.57    0.76 
  -1   0  10   34.77    0.79 
   1   0 -10   30.87    0.23 
  -1   0   9    0.47    0.45 
   1   0  -9   -0.35    0.53 
   1   0  -9   -0.20    0.16 
  -1   0   9   -0.04    0.10 
  -1   0   9   -0.35    0.12 
  -1   0   8    1.11    0.14 
  -1   0   8    0.76    0.40 
   1   0  -8    0.51    0.49 
  -1   0   8    1.03    0.09 
   1   0  -8    1.00    0.15 
   1   0  -7    0.08    0.10 
  -1   0   7    0.37    0.11 
   1   0  -7   -0.13    0.45 
  -1   0   7    0.14    0.08 
  -1   0   7    0.34    0.37 
   1   0  -6  488.87    7.91 
   1   0  -6  496.73    8.10 
  -1   0   6  491.00    7.94 
  -1   0   6  495.29    7.61 
  -1   0   6  491.48    8.05 
  -1   0   5    0.18    0.06 
   1   0  -5    0.03    0.09 
  -1   0   5   -0.51    0.34 
   1   0  -5    0.15    0.33 
  -1   0   5    0.05    0.09 
  -1   0   4    4.45    0.21 
   1   0  -4    4.73    0.33 
  -1   0   4    4.23    0.39 
   1   0  -3    0.03    0.25 
   1   0  -3    0.15    0.07 
  -1   0   3    0.13    0.27 
  -1   0   1    0.00    0.01 
  -1   0   1    0.00    0.01 
   1   0  -1    0.00    0.00 
   1   0  -1    0.00    0.01 
  -1   0  -1    0.00    0.04 
   1   0   1    0.02    0.01 
   1   0   1   -0.01    0.06 
   1   0   1    0.00    0.02 
  -1   0  -1   -0.02    0.02 
   1   0   2   35.50    0.27 
  -1   0  -2   35.72    0.26 
   1   0   3    0.32    0.26 
   1   0   3    0.06    0.08 
  -1   0  -3    0.48    0.31 
   1   0   3    0.27    0.09 
  -1   0  -4    2.51    0.32 
   1   0   4    2.65    0.34 
  -1   0  -5   -0.03    0.11 
  -1   0  -5   -0.46    0.26 
   1   0   5    0.07    0.10 
   1   0   5   -0.04    0.09 
   1   0   5    0.22    0.38 
   1   0   6  108.97    1.16 
  -1   0  -6  109.43    1.22 
  -1   0  -6  108.01    1.02 
   1   0   6  107.55    1.25 
   1   0   6  108.99    0.91 
   1   0   7   -0.02    0.14 
   1   0   7    0.33    0.52 
   1   0   7   -0.07    0.11 
  -1   0  -7   -0.07    0.47 
  -1   0  -8   26.95    0.65 
   1   0   8   27.81    0.69 
   1   0   9   -0.14    0.15 
   1   0   9    0.70    0.61 
  -1   0  -9   -0.50    0.56 
   1   0   9   -0.23    0.13 
   1   0  10    3.38    0.73 
   1   0  11    1.22    0.77 
   1   0  12    5.35    0.18 
   1   0  12    6.20    0.68 
   1   0  13    0.48    0.71 
   1   0  13   -0.21    0.18 
   1   0  14    1.24    0.78 
   1   0  15    0.11    1.07 
   1   0  16    6.53    1.19 
   1   0  17    0.25    1.23 
  -1   1  17    0.92    1.20 
  -1  -1  17   -0.10    1.19 
  -1   1  16    1.30    1.13 
  -1  -1  16    1.37    1.14 
  -1   1  15    6.20    0.81 
  -1  -1  15    8.22    1.10 
  -1   1  14    2.34    0.94 
  -1  -1  14    3.17    0.99 
  -1   1  13   27.01    0.20 
  -1   1  13   31.89    1.08 
   1  -1 -13   26.65    0.33 
  -1  -1  13   27.40    0.21 
  -1  -1  13   32.96    1.09 
  -1   1  12    5.06    0.83 
  -1   1  12    4.36    0.13 
  -1  -1  12    4.24    0.15 
  -1  -1  12    5.61    0.84 
   1  -1 -12    4.48    0.25 
  -1   1  11    0.16    0.11 
   1   1 -11    0.36    0.20 
  -1   1  11    0.81    0.54 
   1  -1 -11    0.23    0.20 
  -1  -1  11    1.55    0.75 
  -1  -1  11    0.15    0.13 
  -1   1  10   37.65    0.86 
  -1   1  10   37.04    0.51 
   1   1 -10   37.89    0.85 
  -1  -1  10   38.11    0.89 
   1  -1 -10   36.83    0.83 
  -1   1   9    3.51    0.60 
   1   1  -9    2.85    0.42 
  -1   1   9    2.62    0.09 
  -1   1   9    2.51    0.14 
   1   1  -9    2.56    0.16 
   1  -1  -9    2.40    0.55 
  -1  -1   9    2.44    0.15 
  -1  -1   9    2.75    0.11 
  -1  -1   9    2.64    0.44 
   1  -1  -9    2.58    0.17 
  -1   1   8    8.75    0.16 
  -1   1   8    9.02    0.10 
  -1   1   8   11.47    0.60 
   1   1  -8    8.78    0.16 
   1   1  -8   10.40    0.56 
  -1  -1   8    8.62    0.15 
  -1  -1   8    9.19    0.12 
  -1  -1   8   11.40    0.62 
   1  -1  -8   10.38    0.56 
   1  -1  -8    8.62    0.16 
  -1   1   7    1.55    0.14 
   1   1  -7    1.27    0.14 
   1   1  -7    1.40    0.36 
  -1   1   7    1.42    0.48 
  -1   1   7    1.26    0.08 
   1  -1  -7    1.31    0.11 
   1  -1  -7    1.24    0.46 
  -1  -1   7    1.39    0.13 
  -1  -1   7    2.16    0.51 
   1   1  -6   18.41    0.53 
  -1   1   6   20.04    0.57 
  -1   1   6   18.58    0.30 
  -1  -1   6   19.05    0.55 
   1  -1  -6   19.59    0.48 
  -1  -1   6   19.28    0.35 
  -1   1   5    0.60    0.36 
   1   1  -5    0.15    0.09 
  -1   1   5    0.18    0.07 
   1   1  -5    0.01    0.05 
   1   1  -5    0.46    0.36 
  -1   1   5    0.04    0.05 
  -1  -1   5    0.07    0.09 
  -1  -1   5    0.10    0.06 
  -1  -1   5    0.37    0.28 
   1  -1  -5    0.10    0.08 
   1  -1  -5    0.11    0.25 
   1   1  -4  151.22    1.09 
   1   1  -4  151.82    1.39 
  -1   1   4  150.16    1.42 
   1   1  -4  152.13    1.44 
  -1   1   4  154.57    1.42 
  -1  -1   4  152.58    1.47 
   1  -1  -4  152.33    1.38 
   1  -1  -4  151.45    1.47 
  -1  -1   4  153.14    1.41 
  -1  -1   4  150.47    1.12 
   1   1  -3   42.47    0.58 
  -1   1   3   40.81    0.47 
  -1   1   3   40.25    0.49 
   1   1  -3   40.59    0.29 
   1   1  -3   40.34    0.50 
   1  -1  -3   41.78    0.58 
  -1  -1   3   40.64    0.31 
   1  -1  -3   40.53    0.42 
  -1  -1   3   39.52    0.51 
  -1  -1   3   41.79    0.53 
  -1   1   2    8.18    0.04 
  -1  -1   2    8.30    0.04 
   1   1  -1    0.04    0.00 
  -1   1   1    0.05    0.01 
   1   1  -1    0.05    0.01 
  -1   1   1    0.05    0.01 
  -1   1   1    0.02    0.01 
   1  -1  -1    0.04    0.01 
   1  -1  -1    0.04    0.01 
  -1  -1   1    0.05    0.00 
  -1  -1   1    0.05    0.01 
   1   1   0    0.71    0.01 
  -1   1   0    0.69    0.01 
   1   1   0    0.69    0.01 
  -1   1   0    0.71    0.02 
   1  -1   0    0.69    0.01 
  -1  -1   0    0.73    0.02 
   1  -1   0    0.69    0.01 
  -1  -1   0    0.69    0.02 
   1   1   1    0.30    0.03 
   1   1   1    0.27    0.06 
  -1   1  -1    0.21    0.02 
  -1   1  -1    0.23    0.05 
   1   1   1    0.21    0.01 
   1  -1   1    0.25    0.07 
  -1  -1  -1    0.23    0.06 
  -1  -1  -1    0.14    0.03 
   1  -1   1    0.18    0.02 
  -1   1  -2    1.07    0.05 
  -1   1  -2    1.78    0.22 
   1   1   2    1.25    0.06 
   1   1   2    1.65    0.22 
   1  -1   2    1.23    0.07 
  -1  -1  -2    1.16    0.07 
   1  -1   2    1.44    0.23 
  -1  -1  -2    1.50    0.11 
  -1  -1  -2    1.28    0.16 
  -1   1  -3    1.45    0.07 
   1   1   3    1.69    0.08 
   1   1   3    1.84    0.25 
  -1   1  -3    1.75    0.32 
   1  -1   3    1.63    0.08 
  -1  -1  -3    1.85    0.17 
   1  -1   3    1.68    0.35 
  -1  -1  -3    2.04    0.24 
   1  -1   3    1.76    0.10 
  -1  -1  -3    1.48    0.11 
  -1   1  -4   57.77    0.67 
   1   1   4   58.83    0.82 
  -1   1  -4   56.58    0.48 
   1   1   4   57.09    0.68 
   1  -1   4   58.00    0.77 
  -1  -1  -4   57.90    0.66 
  -1  -1  -4   58.36    0.89 
   1  -1   4   57.39    0.69 
   1  -1   4   57.63    0.51 
  -1   1  -5    2.31    0.08 
   1   1   5    3.43    0.41 
   1   1   5    2.23    0.11 
  -1   1  -5    2.83    0.40 
   1   1   5    2.30    0.08 
  -1  -1  -5    2.68    0.38 
  -1  -1  -5    2.19    0.10 
   1  -1   5    2.35    0.10 
   1  -1   5    3.25    0.43 
   1  -1   5    2.27    0.10 
   1   1   6   34.67    0.49 
   1   1   6   35.15    0.61 
  -1   1  -6   34.54    0.70 
   1  -1   6   35.32    0.53 
  -1  -1  -6   34.71    0.58 
   1  -1   6   34.97    0.82 
   1  -1   6   34.30    0.73 
   1   1   7    1.16    0.11 
   1   1   7    1.58    0.54 
   1   1   7    1.15    0.14 
  -1   1  -7    1.40    0.39 
   1  -1   7    1.20    0.14 
   1  -1   7    2.18    0.45 
  -1  -1  -7    0.94    0.49 
  -1  -1  -7    1.16    0.17 
   1  -1   7    1.22    0.12 
   1   1   8   19.47    0.57 
   1   1   8   16.34    0.19 
   1   1   8   16.66    0.15 
   1  -1   8   19.29    0.67 
   1  -1   8   16.25    0.18 
  -1  -1  -8   15.82    0.21 
   1  -1   8   16.72    0.16 
  -1  -1  -8   19.21    0.64 
   1   1   9   37.04    0.62 
   1   1   9   37.31    0.85 
  -1   1  -9   37.18    0.81 
  -1  -1  -9   37.97    0.75 
   1  -1   9   38.34    0.89 
   1   1  10    9.44    0.75 
   1  -1  10    9.01    0.75 
   1   1  11    9.33    0.17 
   1   1  11   11.88    0.82 
   1  -1  11   10.33    0.63 
  -1  -1 -11    8.80    0.42 
   1  -1  11    9.87    0.18 
   1   1  12    4.34    0.72 
   1  -1  12    3.48    0.69 
   1   1  13    2.21    0.96 
   1  -1  13    2.21    0.90 
   1  -1  13    1.06    0.20 
   1   1  14    8.73    1.05 
   1  -1  14    7.98    0.99 
   1   1  15    1.18    1.08 
   1  -1  15    0.84    1.05 
   1   1  16    5.61    1.14 
   1  -1  16    5.79    1.14 
   1   1  17    0.77    0.98 
   1  -1  17    1.15    1.20 
  -1   2  17    0.53    1.18 
  -1  -2  17   -0.34    0.90 
  -1   2  16    1.28    1.08 
  -1  -2  16    1.59    0.88 
  -1   2  15    1.77    1.06 
  -1  -2  15    1.37    1.02 
  -1   2  14    0.55    0.74 
  -1  -2  14    1.34    0.99 
   1  -2 -14   -0.15    0.30 
  -1   2  13    8.58    0.94 
  -1   2  13    5.70    0.15 
  -1  -2  13    5.99    0.17 
   1  -2 -13    5.61    0.27 
  -1  -2  13    6.51    0.93 
  -1   2  12    1.73    0.84 
  -1   2  12    0.08    0.13 
   1  -2 -12    0.48    0.27 
  -1  -2  12    1.87    0.85 
  -1  -2  12    0.14    0.15 
  -1   2  11   24.51    0.83 
  -1  -2  11   26.10    0.85 
  -1   2  10   46.48    0.86 
  -1   2  10   45.65    0.51 
   1   2 -10   46.14    0.82 
   1  -2 -10   46.56    0.83 
  -1  -2  10   47.04    0.88 
  -1   2   9    0.06    0.14 
  -1   2   9    0.09    0.09 
   1   2  -9   -0.51    0.52 
  -1   2   9    0.08    0.57 
   1   2  -9    0.11    0.16 
   1  -2  -9   -0.17    0.54 
  -1  -2   9   -0.01    0.13 
   1  -2  -9    0.10    0.18 
  -1  -2   9    0.21    0.58 
  -1  -2   9    0.11    0.11 
   1   2  -8   22.24    0.69 
  -1   2   8   23.68    0.71 
  -1   2   8   22.76    0.40 
   1  -2  -8   22.89    0.61 
  -1  -2   8   23.04    0.72 
  -1  -2   8   24.09    0.52 
   1   2  -7   26.13    0.39 
  -1   2   7   27.14    0.68 
  -1   2   7   25.69    0.37 
   1   2  -7   25.30    0.63 
  -1   2   7   25.82    0.66 
  -1  -2   7   27.31    0.49 
   1  -2  -7   26.10    0.57 
  -1  -2   7   26.69    0.68 
  -1   2   6   53.72    0.80 
   1   2  -6   54.28    0.79 
   1   2  -6   53.95    0.72 
  -1   2   6   53.88    0.73 
   1   2  -6   53.95    0.44 
   1  -2  -6   54.60    0.86 
  -1  -2   6   53.72    0.74 
  -1  -2   6   53.13    0.83 
  -1  -2   6   53.74    0.50 
   1  -2  -6   54.02    0.70 
  -1   2   5   55.01    0.69 
  -1   2   5   55.98    0.68 
   1   2  -5   55.64    0.74 
   1   2  -5   55.54    0.45 
   1   2  -5   54.43    0.68 
  -1  -2   5   56.74    0.73 
   1  -2  -5   55.58    0.61 
   1  -2  -5   55.50    0.80 
  -1  -2   5   55.40    0.50 
  -1  -2   5   55.34    0.72 
  -1   2   4   18.70    0.58 
   1   2  -4   18.96    0.32 
  -1   2   4   18.56    0.44 
   1   2  -4   19.66    0.61 
   1   2  -4   18.91    0.52 
  -1  -2   4   19.12    0.54 
   1  -2  -4   18.41    0.51 
  -1  -2   4   19.45    0.59 
   1  -2  -4   18.61    0.50 
  -1  -2   4   19.44    0.37 
   1   2  -3    6.87    0.07 
   1   2  -3    6.96    0.07 
  -1   2   3    6.76    0.08 
  -1   2   3    7.00    0.30 
   1   2  -3    6.87    0.29 
  -1  -2   3    6.92    0.08 
  -1  -2   3    7.38    0.24 
  -1  -2   3    6.90    0.08 
   1  -2  -3    6.72    0.06 
   1  -2  -3    7.08    0.28 
  -1   2   2   18.36    0.05 
  -1   2   2   18.28    0.06 
  -1   2   2   19.04    0.21 
   1   2  -2   17.83    0.12 
   1  -2  -2   18.08    0.12 
  -1  -2   2   18.30    0.05 
  -1  -2   2   18.27    0.07 
   1  -2  -2   18.15    0.04 
   1   2  -1   -0.19    0.04 
   1   2  -1   -0.11    0.04 
  -1   2   1    0.09    0.05 
   1   2  -1   -0.12    0.01 
  -1   2   1   -0.22    0.02 
  -1   2   1   -0.09    0.01 
  -1  -2   1   -0.12    0.04 
   1  -2  -1   -0.16    0.04 
   1  -2  -1    0.02    0.01 
   1  -2  -1    0.01    0.01 
   1  -2  -1    0.07    0.04 
  -1  -2   1    0.07    0.03 
  -1   2   0   -0.26    0.03 
  -1   2   0   -0.47    0.03 
   1   2   0   -0.45    0.04 
  -1   2   0   -0.30    0.01 
   1   2   0   -0.24    0.03 
   1   2   0   -0.35    0.01 
   1  -2   0   -0.16    0.01 
   1  -2   0   -0.60    0.02 
  -1  -2   0   -0.16    0.04 
  -1  -2   0   -0.32    0.02 
   1  -2   0   -0.30    0.05 
   1  -2   0   -0.36    0.01 
  -1  -2   0   -0.19    0.01 
  -1   2  -1   -0.52    0.02 
  -1   2  -1   -0.29    0.03 
   1   2   1   -0.09    0.04 
   1   2   1   -0.59    0.06 
   1   2   1   -0.45    0.02 
  -1   2  -1    0.47    0.07 
   1  -2   1   -0.42    0.07 
   1  -2   1   -0.47    0.03 
  -1  -2  -1    0.72    0.06 
  -1  -2  -1   -0.25    0.03 
  -1  -2  -1    0.10    0.08 
   1  -2   1   -0.29    0.02 
  -1   2  -2  121.18    0.93 
   1   2   2  122.11    1.07 
  -1   2  -2  122.74    0.88 
   1   2   2  123.15    0.95 
   1   2   2  123.01    0.89 
   1  -2   2  121.87    0.89 
  -1  -2  -2  119.96    0.90 
   1  -2   2  122.13    0.91 
  -1  -2  -2  121.82    1.12 
  -1  -2  -2  122.11    0.90 
   1   2   3   21.21    0.48 
  -1   2  -3   20.42    0.35 
  -1   2  -3   20.38    0.38 
   1   2   3   21.82    0.52 
  -1  -2  -3   20.16    0.35 
  -1  -2  -3   21.66    0.58 
   1  -2   3   20.70    0.45 
   1  -2   3   21.18    0.39 
  -1  -2  -3   21.37    0.43 
  -1   2  -4    7.20    0.09 
   1   2   4    8.04    0.29 
  -1   2  -4    7.74    0.27 
   1   2   4    7.36    0.11 
   1  -2   4    7.72    0.30 
  -1  -2  -4    7.32    0.12 
   1  -2   4    7.43    0.10 
  -1  -2  -4    7.50    0.21 
  -1  -2  -4    7.99    0.27 
   1  -2   4    7.41    0.10 
  -1   2  -5    1.47    0.40 
   1   2   5    1.55    0.33 
   1  -2   5    1.52    0.35 
  -1  -2  -5    1.45    0.39 
  -1  -2  -5    1.11    0.23 
   1   2   6    1.51    0.46 
   1   2   6    1.20    0.09 
  -1   2  -6    1.27    0.10 
  -1   2  -6    1.31    0.44 
   1   2   6    1.21    0.12 
   1  -2   6    1.26    0.10 
  -1  -2  -6    1.33    0.33 
  -1  -2  -6    1.39    0.24 
   1  -2   6    1.45    0.12 
   1  -2   6    1.40    0.48 
  -1  -2  -6    1.60    0.15 
   1   2   7   11.73    0.54 
   1   2   7   11.04    0.11 
  -1   2  -7   11.84    0.52 
  -1   2  -7   10.89    0.11 
   1   2   7   10.78    0.11 
  -1  -2  -7   11.20    0.27 
   1  -2   7   12.05    0.57 
  -1  -2  -7   10.94    0.17 
  -1  -2  -7   11.62    0.39 
   1  -2   7   11.16    0.12 
   1  -2   7   11.17    0.13 
   1   2   8    9.51    0.12 
   1   2   8    9.40    0.15 
   1   2   8   10.23    0.46 
  -1   2  -8   10.53    0.57 
  -1  -2  -8    9.49    0.32 
   1  -2   8   10.14    0.59 
   1  -2   8    9.40    0.14 
  -1  -2  -8    9.33    0.18 
   1  -2   8    9.47    0.13 
  -1  -2  -8    9.82    0.53 
  -1   2  -9   75.08    1.15 
   1   2   9   75.30    0.81 
   1   2   9   74.76    1.19 
   1  -2   9   74.30    0.87 
   1  -2   9   76.65    1.08 
  -1  -2  -9   74.73    1.02 
   1  -2   9   72.01    1.20 
  -1  -2  -9   76.32    1.17 
  -1  -2  -9   72.81    1.46 
   1   2  10   22.93    0.19 
  -1  -2 -10   22.38    0.27 
   1  -2  10   22.63    0.20 
  -1  -2 -10   24.32    0.49 
   1  -2  10   26.61    0.87 
   1   2  11    6.94    0.80 
   1   2  11    5.47    0.16 
   1  -2  11    5.93    0.80 
  -1  -2 -11    4.01    0.41 
   1  -2  11    5.45    0.18 
   1   2  12   -0.30    0.64 
   1   2  12   -0.18    0.17 
   1  -2  12   -0.31    0.19 
   1  -2  12    0.80    0.68 
   1   2  13    6.40    0.98 
   1   2  13    5.26    0.19 
   1  -2  13    6.26    0.95 
   1   2  14    5.20    1.02 
   1  -2  14    5.96    1.06 
   1   2  15   21.94    1.01 
   1  -2  15   20.80    1.21 
   1   2  16    2.53    1.16 
   1  -2  16    3.80    1.20 
   1   2  17    3.49    1.28 
   1  -2  17    3.42    1.30 
  -1   3  17    6.53    1.24 
  -1  -3  17    7.26    1.27 
  -1   3  16   -0.08    1.09 
  -1  -3  16    1.45    1.12 
  -1   3  15   -0.07    0.97 
  -1  -3  15    1.24    1.01 
   1  -3 -15    0.14    0.30 
  -1   3  14    5.62    0.99 
  -1  -3  14    7.03    0.82 
   1  -3 -14    4.22    0.32 
  -1   3  13    0.66    0.13 
  -1   3  13    0.38    0.82 
  -1  -3  13    1.08    0.90 
  -1  -3  13    0.88    0.18 
   1  -3 -13    0.67    0.27 
  -1   3  12   36.79    1.04 
  -1   3  12   30.78    0.19 
   1  -3 -12   30.15    0.33 
  -1  -3  12   30.96    0.23 
  -1   3  11   15.22    0.82 
  -1   3  11   13.06    0.13 
  -1  -3  11   13.23    0.17 
  -1  -3  11   15.69    0.84 
   1  -3 -11   12.88    0.26 
  -1   3  10    0.39    0.63 
  -1   3  10    0.40    0.10 
   1   3 -10   -0.25    0.60 
  -1  -3  10    0.34    0.65 
   1  -3 -10    0.35    0.60 
  -1  -3  10    0.20    0.16 
  -1  -3  10    0.23    0.13 
   1  -3 -10    0.19    0.20 
   1   3  -9    0.32    0.56 
   1   3  -9    0.33    0.09 
  -1   3   9    0.16    0.15 
  -1   3   9    0.46    0.45 
  -1   3   9    0.27    0.09 
   1  -3  -9    0.40    0.18 
  -1  -3   9    0.70    0.61 
  -1  -3   9    0.24    0.12 
   1  -3  -9   -0.16    0.39 
  -1  -3   9    0.21    0.13 
   1   3  -8   15.05    0.58 
  -1   3   8   15.82    0.60 
   1  -3  -8   14.40    0.44 
  -1  -3   8   14.44    0.61 
   1   3  -7   53.66    0.85 
  -1   3   7   53.02    0.88 
  -1   3   7   54.40    0.97 
   1   3  -7   53.71    0.52 
   1  -3  -7   52.38    1.07 
  -1  -3   7   54.26    0.90 
  -1  -3   7   53.43    0.76 
  -1  -3   7   54.48    0.65 
   1  -3  -7   54.03    0.83 
   1   3  -6   11.02    0.10 
   1   3  -6   10.58    0.12 
  -1   3   6   10.81    0.12 
  -1  -3   6   11.02    0.12 
   1  -3  -6   13.14    0.47 
  -1  -3   6   10.54    0.12 
  -1  -3   6   13.55    0.52 
   1  -3  -6   10.70    0.12 
   1   3  -5   13.87    0.47 
  -1   3   5   14.03    0.47 
   1   3  -5   13.99    0.34 
  -1   3   5   14.68    0.49 
  -1  -3   5   14.50    0.40 
  -1  -3   5   14.46    0.50 
   1  -3  -5   14.42    0.47 
   1   3  -4   26.10    0.58 
   1   3  -4   24.47    0.52 
  -1   3   4   25.78    0.55 
  -1   3   4   25.76    0.59 
   1   3  -4   25.31    0.37 
  -1  -3   4   25.75    0.55 
   1  -3  -4   24.96    0.52 
  -1  -3   4   25.34    0.50 
   1  -3  -4   25.44    0.53 
  -1  -3   4   25.38    0.42 
  -1   3   3   97.18    0.79 
  -1   3   3   97.63    0.82 
  -1   3   3   96.14    0.67 
   1   3  -3   98.35    0.80 
   1   3  -3   97.32    0.67 
   1   3  -3   97.26    0.81 
   1  -3  -3   96.66    0.74 
  -1  -3   3   96.83    0.81 
  -1  -3   3   98.84    0.80 
  -1  -3   3   97.75    0.77 
   1  -3  -3   96.80    0.82 
  -1   3   2    0.13    0.04 
   1   3  -2    0.05    0.11 
   1   3  -2    0.17    0.07 
  -1   3   2    0.18    0.23 
  -1   3   2    0.13    0.07 
   1   3  -2    0.34    0.19 
   1  -3  -2    0.37    0.17 
   1  -3  -2    0.08    0.06 
  -1  -3   2    0.08    0.08 
  -1  -3   2   -0.01    0.10 
   1  -3  -2   -0.05    0.20 
   1  -3  -2    0.18    0.06 
  -1  -3   2    0.11    0.21 
   1   3  -1    0.27    0.07 
   1   3  -1    0.31    0.03 
  -1   3   1    0.47    0.05 
  -1   3   1    0.30    0.02 
   1   3  -1    0.29    0.08 
  -1   3   1    0.19    0.14 
  -1   3   1    0.43    0.10 
  -1  -3   1    0.42    0.12 
   1  -3  -1    0.27    0.07 
   1  -3  -1    0.37    0.09 
   1  -3  -1    0.32    0.03 
  -1  -3   1    0.39    0.08 
   1  -3  -1    0.22    0.03 
  -1  -3   1    0.29    0.05 
   1   3   0    7.71    0.06 
   1   3   0    7.70    0.05 
   1   3   0    7.75    0.08 
  -1   3   0    8.21    0.07 
  -1   3   0    8.08    0.09 
  -1   3   0    7.86    0.03 
   1  -3   0    7.59    0.09 
   1  -3   0    7.67    0.04 
  -1  -3   0    8.04    0.06 
  -1  -3   0    7.99    0.10 
  -1   3  -1   88.79    0.61 
  -1   3  -1   88.15    0.63 
  -1   3  -1   91.00    0.56 
   1   3   1   90.87    0.65 
   1  -3   1   91.09    0.67 
  -1  -3  -1   91.21    0.74 
  -1  -3  -1   91.34    0.64 
   1  -3   1   87.04    0.60 
  -1  -3  -1   91.54    0.65 
  -1   3  -2    7.04    0.12 
  -1   3  -2    6.50    0.10 
   1   3   2    7.52    0.20 
   1   3   2    7.70    0.25 
   1   3   2    6.33    0.10 
  -1  -3  -2    7.91    0.29 
   1  -3   2    7.65    0.32 
   1  -3   2    6.64    0.11 
  -1  -3  -2    6.43    0.11 
   1  -3   2    6.75    0.11 
  -1   3  -3    3.99    0.09 
   1   3   3    4.55    0.22 
   1   3   3    5.07    0.35 
  -1   3  -3    4.46    0.27 
   1   3   3    4.05    0.11 
   1  -3   3    4.49    0.36 
  -1  -3  -3    4.58    0.21 
   1  -3   3    3.98    0.11 
  -1  -3  -3    4.71    0.33 
  -1  -3  -3    3.89    0.09 
   1   3   4    0.80    0.10 
   1   3   4    1.01    0.36 
  -1   3  -4    0.67    0.33 
  -1   3  -4    0.88    0.08 
   1  -3   4    0.54    0.36 
  -1  -3  -4    1.47    0.33 
  -1  -3  -4    0.84    0.12 
   1  -3   4    0.83    0.09 
  -1  -3  -4    0.85    0.19 
   1   3   5   10.63    0.10 
  -1   3  -5   11.23    0.12 
  -1  -3  -5   12.95    0.43 
  -1  -3  -5   12.00    0.25 
   1  -3   5   13.13    0.49 
   1  -3   5   10.85    0.11 
  -1  -3  -5   10.68    0.15 
   1  -3   5   11.02    0.12 
  -1   3  -6    1.21    0.11 
   1   3   6    1.08    0.12 
  -1   3  -6    1.11    0.34 
   1   3   6    1.59    0.46 
   1  -3   6    1.22    0.12 
   1  -3   6    1.31    0.11 
   1  -3   6    1.37    0.50 
  -1  -3  -6    1.28    0.16 
  -1  -3  -6    1.70    0.43 
  -1  -3  -6    1.09    0.26 
  -1   3  -7   59.69    0.90 
   1   3   7   59.43    0.93 
  -1   3  -7   61.11    0.64 
   1   3   7   59.13    1.05 
  -1  -3  -7   59.57    0.91 
   1  -3   7   60.21    0.74 
   1  -3   7   60.82    0.99 
   1  -3   7   59.39    0.96 
  -1  -3  -7   60.13    1.24 
  -1  -3  -7   60.85    0.89 
  -1   3  -8   66.83    0.70 
   1   3   8   64.66    1.10 
   1   3   8   67.17    1.03 
  -1   3  -8   67.91    0.86 
   1   3   8   68.05    0.70 
  -1  -3  -8   68.12    0.85 
  -1  -3  -8   65.78    1.08 
   1  -3   8   67.89    1.07 
  -1  -3  -8   65.77    0.89 
   1  -3   8   67.00    0.78 
   1  -3   8   67.97    1.07 
  -1   3  -9   25.58    0.77 
   1   3   9   25.84    0.56 
   1   3   9   26.65    0.83 
   1  -3   9   26.85    0.86 
  -1  -3  -9   26.70    0.80 
  -1  -3  -9   23.24    0.44 
   1   3  10   30.43    0.74 
   1   3  10   26.46    0.20 
  -1  -3 -10   28.37    0.47 
   1  -3  10   26.53    0.23 
   1  -3  10   30.39    0.75 
  -1  -3 -10   25.76    0.29 
   1   3  11    9.22    0.17 
   1   3  11   11.88    0.86 
  -1  -3 -11    9.28    0.49 
   1  -3  11    9.23    0.19 
  -1  -3 -11    8.20    0.28 
   1  -3  11   11.07    0.87 
   1   3  12    2.61    0.16 
   1   3  12    2.83    0.85 
   1  -3  12    2.42    0.19 
   1  -3  12    2.69    0.66 
   1   3  13   22.05    1.03 
   1  -3  13   22.57    1.06 
   1   3  14    6.40    1.05 
   1  -3  14    6.58    1.06 
   1   3  15    4.21    1.14 
   1  -3  15    2.64    1.08 
   1   3  16    1.90    0.93 
   1  -3  16    1.47    1.11 
  -1   4  17    0.80    1.23 
  -1  -4  17    0.46    0.84 
  -1   4  16    4.73    1.12 
  -1  -4  16    2.68    1.09 
  -1   4  15    1.23    1.01 
   1  -4 -15    1.53    0.33 
  -1  -4  15    3.01    1.06 
  -1   4  14    8.98    0.97 
  -1  -4  14    9.27    0.98 
  -1   4  13    6.77    0.15 
  -1   4  13    8.31    0.93 
  -1  -4  13    7.21    0.21 
   1  -4 -13    6.79    0.30 
  -1  -4  13    7.72    0.94 
  -1   4  12    2.81    0.13 
  -1   4  12    3.03    0.83 
   1  -4 -12    2.56    0.27 
  -1  -4  12    2.58    0.17 
  -1  -4  12    4.00    0.67 
  -1   4  11    4.23    0.76 
  -1   4  11    3.30    0.12 
   1  -4 -11    3.06    0.25 
  -1  -4  11    3.72    0.18 
  -1  -4  11    3.40    0.20 
  -1  -4  11    4.05    0.78 
  -1   4  10   22.72    0.80 
   1   4 -10   24.37    0.51 
   1   4 -10   22.65    0.76 
  -1   4  10   23.77    0.48 
   1  -4 -10   24.95    0.82 
  -1  -4  10   23.63    0.84 
  -1   4   9    0.45    0.09 
   1   4  -9    0.24    0.42 
  -1   4   9    1.27    0.62 
  -1   4   9    0.12    0.14 
   1   4  -9    0.35    0.10 
  -1  -4   9   -0.16    0.60 
   1  -4  -9    0.18    0.32 
  -1  -4   9    0.36    0.14 
  -1  -4   9    0.30    0.13 
   1  -4  -9    0.37    0.54 
   1  -4  -9    0.43    0.19 
  -1   4   8   71.13    0.97 
   1   4  -8   71.92    0.74 
   1   4  -8   70.71    1.04 
  -1   4   8   70.24    1.17 
   1  -4  -8   74.25    1.09 
  -1  -4   8   71.52    0.85 
  -1  -4   8   71.88    1.10 
   1  -4  -8   72.43    1.39 
  -1  -4   8   71.30    1.12 
   1   4  -7   79.34    0.81 
  -1   4   7   80.13    0.90 
   1   4  -7   80.61    0.66 
  -1   4   7   80.86    0.98 
  -1  -4   7   80.38    0.77 
  -1  -4   7   79.69    1.03 
  -1  -4   7   79.77    1.00 
   1  -4  -7   77.77    1.12 
   1  -4  -7   80.59    0.82 
  -1   4   6    8.94    0.45 
   1   4  -6    8.43    0.09 
  -1   4   6    8.45    0.11 
   1   4  -6    8.81    0.33 
  -1  -4   6    8.55    0.11 
   1  -4  -6    8.35    0.12 
  -1  -4   6    8.63    0.46 
  -1  -4   6    8.46    0.11 
   1  -4  -6    8.31    0.21 
   1  -4  -6    8.46    0.40 
  -1   4   5  101.44    0.97 
   1   4  -5  100.21    0.74 
   1   4  -5  100.76    0.87 
  -1   4   5  100.56    1.00 
   1  -4  -5  100.26    0.93 
   1  -4  -5  101.27    0.98 
  -1  -4   5   99.83    0.95 
  -1  -4   5   99.18    0.77 
   1  -4  -5  100.37    1.07 
  -1  -4   5   98.81    0.94 
  -1   4   4   64.89    0.71 
   1   4  -4   66.17    0.68 
  -1   4   4   64.94    0.59 
   1   4  -4   66.02    0.56 
   1  -4  -4   65.05    0.76 
  -1  -4   4   65.45    0.62 
  -1  -4   4   65.56    0.67 
   1  -4  -4   65.48    0.71 
  -1  -4   4   65.17    0.64 
   1  -4  -4   65.52    0.66 
   1   4  -3   15.86    0.38 
  -1   4   3   14.68    0.37 
  -1   4   3   15.05    0.39 
   1   4  -3   13.83    0.43 
  -1   4   3   14.41    0.37 
  -1  -4   3   15.33    0.40 
   1  -4  -3   15.38    0.55 
   1  -4  -3   14.17    0.44 
  -1  -4   3   13.61    0.38 
   1  -4  -3   16.32    0.55 
  -1  -4   3   14.62    0.42 
  -1   4   2    3.10    0.05 
  -1   4   2    3.69    0.23 
  -1   4   2    3.74    0.28 
  -1   4   2    3.21    0.09 
   1   4  -2    3.17    0.13 
   1   4  -2    3.31    0.09 
   1   4  -2    3.39    0.26 
   1  -4  -2    3.34    0.27 
  -1  -4   2    3.12    0.10 
   1  -4  -2    3.21    0.08 
  -1  -4   2    2.97    0.12 
   1  -4  -2    3.51    0.17 
  -1  -4   2    3.77    0.27 
   1  -4  -2    2.98    0.08 
  -1   4   1   51.74    0.40 
   1   4  -1   50.17    0.21 
  -1   4   1   51.68    0.48 
  -1   4   1   51.28    0.44 
   1   4  -1   50.53    0.44 
  -1   4   1   51.27    0.41 
   1   4  -1   50.59    0.38 
   1   4  -1   51.64    0.44 
  -1   4   1   52.01    0.39 
  -1  -4   1   50.99    0.41 
   1  -4  -1   51.52    0.39 
   1  -4  -1   51.38    0.42 
   1  -4  -1   51.73    0.43 
  -1  -4   1   51.58    0.42 
   1  -4  -1   51.30    0.41 
  -1  -4   1   50.84    0.48 
   1   4   0   16.35    0.18 
   1   4   0   16.44    0.19 
  -1   4   0   16.37    0.16 
  -1   4   0   16.88    0.23 
  -1   4   0   17.28    0.25 
   1   4   0   17.48    0.26 
  -1  -4   0   17.90    0.29 
   1  -4   0   17.46    0.27 
   1  -4   0   16.08    0.14 
   1  -4   0   16.97    0.26 
  -1  -4   0   16.95    0.24 
  -1  -4   0   16.26    0.17 
   1   4   1   73.94    0.56 
   1   4   1   73.56    0.57 
   1   4   1   73.10    0.53 
  -1   4  -1   73.81    0.53 
  -1   4  -1   73.27    0.54 
  -1   4  -1   73.49    0.48 
   1  -4   1   73.52    0.44 
  -1  -4  -1   73.01    0.49 
  -1  -4  -1   71.95    0.52 
  -1  -4  -1   74.27    0.65 
   1  -4   1   73.14    0.49 
   1  -4   1   74.78    0.63 
  -1   4  -2   14.29    0.34 
   1   4   2   13.80    0.20 
  -1   4  -2   13.14    0.12 
   1   4   2   13.88    0.34 
  -1   4  -2   13.51    0.15 
   1  -4   2   13.39    0.13 
   1  -4   2   13.24    0.14 
  -1  -4  -2   13.79    0.32 
   1  -4   2   13.89    0.35 
  -1  -4  -2   12.95    0.12 
  -1  -4  -2   13.76    0.23 
  -1   4  -3  185.96    1.49 
   1   4   3  188.52    1.83 
   1   4   3  184.34    1.66 
  -1   4  -3  185.05    1.58 
   1   4   3  189.28    1.72 
  -1   4  -3  185.43    1.68 
   1  -4   3  185.18    1.63 
  -1  -4  -3  187.65    1.68 
  -1  -4  -3  184.20    1.64 
  -1  -4  -3  186.66    1.91 
   1  -4   3  188.11    1.68 
   1   4   4    6.44    0.26 
  -1   4  -4    7.81    0.36 
   1   4   4    7.02    0.35 
  -1   4  -4    6.20    0.19 
  -1  -4  -4    7.18    0.39 
  -1  -4  -4    6.29    0.25 
   1  -4   4    7.38    0.37 
   1   4   5   23.11    0.52 
  -1   4  -5   23.14    0.49 
  -1   4  -5   23.13    0.62 
  -1  -4  -5   23.31    0.59 
  -1  -4  -5   23.74    0.60 
   1  -4   5   22.84    0.50 
   1  -4   5   23.01    0.63 
   1  -4   5   22.36    0.65 
   1   4   6  104.08    1.35 
   1   4   6  103.15    1.19 
  -1   4  -6  102.96    0.97 
  -1   4  -6  103.14    1.08 
   1  -4   6  104.82    1.07 
  -1  -4  -6  106.38    1.20 
  -1  -4  -6  102.57    1.29 
  -1  -4  -6  104.60    1.18 
   1  -4   6  104.05    1.26 
   1  -4   6  103.74    1.13 
  -1   4  -7    7.15    0.13 
  -1   4  -7    8.61    0.55 
   1   4   7    8.22    0.57 
   1   4   7    6.64    0.15 
  -1  -4  -7    7.54    0.33 
  -1  -4  -7    8.09    0.53 
   1  -4   7    8.00    0.48 
   1  -4   7    7.15    0.16 
   1  -4   7    6.89    0.14 
  -1  -4  -7    6.74    0.19 
   1   4   8   28.88    0.71 
  -1   4  -8   25.55    0.16 
   1   4   8   24.84    0.19 
  -1   4  -8   28.99    0.68 
  -1  -4  -8   26.62    0.39 
  -1  -4  -8   24.76    0.23 
   1  -4   8   24.98    0.17 
   1  -4   8   25.39    0.18 
   1  -4   8   28.97    0.74 
  -1   4  -9    1.83    0.14 
   1   4   9    1.73    0.13 
  -1   4  -9    2.51    0.63 
   1   4   9    2.83    0.54 
  -1  -4  -9    2.77    0.58 
  -1  -4  -9    1.83    0.36 
   1  -4   9    1.75    0.68 
  -1  -4  -9    1.40    0.17 
   1  -4   9    1.55    0.17 
   1  -4   9    1.34    0.14 
   1   4  10    1.96    0.69 
   1   4  10    1.21    0.13 
  -1  -4 -10    1.11    0.37 
   1  -4  10    1.31    0.75 
   1  -4  10    1.19    0.17 
   1  -4  10    1.19    0.16 
  -1  -4 -10    1.61    0.24 
   1   4  11    3.39    0.15 
   1   4  11    4.56    0.81 
   1  -4  11    3.58    0.81 
   1  -4  11    3.11    0.20 
  -1  -4 -11    3.10    0.28 
   1   4  12    2.63    0.90 
   1   4  12    1.38    0.17 
  -1  -4 -12    1.13    0.30 
   1  -4  12    0.92    0.21 
   1  -4  12    1.99    0.69 
   1   4  13    1.10    0.72 
   1   4  13    0.44    0.17 
   1  -4  13    0.18    0.23 
   1  -4  13    0.95    0.96 
   1   4  14    1.22    1.02 
   1   4  14   -0.40    0.21 
   1  -4  14    0.19    0.77 
   1  -4  14   -0.84    0.22 
   1   4  15    1.51    1.08 
   1  -4  15    1.19    1.07 
   1   4  16    1.46    1.20 
   1  -4  16    2.66    1.21 
  -1   5  17    1.27    0.95 
  -1  -5  17    0.68    1.14 
  -1   5  16    2.80    1.17 
  -1  -5  16    0.78    1.02 
   1  -5 -16    0.26    0.37 
  -1   5  15    6.59    1.02 
  -1  -5  15    5.56    0.99 
   1  -5 -15    4.47    0.36 
  -1   5  14    9.03    1.02 
  -1  -5  14    7.16    0.93 
   1  -5 -14    6.07    0.34 
  -1   5  13   -0.08    0.13 
  -1   5  13   -0.19    0.88 
   1  -5 -13    0.31    0.24 
  -1  -5  13    0.14    0.20 
  -1  -5  13    0.81    0.91 
  -1   5  12    0.13    0.13 
  -1   5  12    0.31    0.83 
   1  -5 -12    0.01    0.29 
  -1  -5  12   -0.27    0.18 
  -1  -5  12   -0.11    0.63 
  -1   5  11    0.41    0.75 
   1   5 -11    0.79    0.13 
  -1   5  11    0.70    0.12 
  -1  -5  11    0.97    0.17 
  -1  -5  11    0.19    0.73 
  -1  -5  11    0.86    0.17 
   1   5 -10    2.71    0.49 
  -1   5  10    2.56    0.10 
   1   5 -10    2.48    0.12 
  -1   5  10    2.34    0.69 
   1  -5 -10    2.38    0.22 
  -1  -5  10    2.15    0.52 
  -1  -5  10    2.14    0.16 
  -1  -5  10    2.28    0.14 
  -1   5   9   27.98    0.77 
   1   5  -9   27.67    0.73 
   1   5  -9   27.58    0.49 
   1  -5  -9   27.57    0.73 
  -1  -5   9   26.76    0.76 
   1  -5  -9   25.25    0.47 
   1   5  -8    4.96    0.41 
   1   5  -8    4.62    0.11 
  -1   5   8    4.54    0.11 
  -1   5   8    4.70    0.55 
  -1  -5   8    4.45    0.14 
   1  -5  -8    5.04    0.42 
   1  -5  -8    4.45    0.35 
   1  -5  -8    4.59    0.18 
  -1  -5   8    4.76    0.55 
  -1  -5   8    4.42    0.14 
   1   5  -7    0.86    0.10 
  -1   5   7    1.34    0.53 
  -1   5   7    0.99    0.12 
   1   5  -7    0.70    0.47 
  -1  -5   7    0.94    0.12 
   1  -5  -7    0.98    0.12 
  -1  -5   7    0.14    0.48 
  -1  -5   7    0.86    0.14 
   1  -5  -7    0.72    0.46 
   1  -5  -7    0.90    0.33 
  -1   5   6    5.36    0.42 
   1   5  -6    3.61    0.10 
  -1   5   6    3.29    0.10 
   1   5  -6    4.70    0.48 
   1  -5  -6    3.56    0.15 
  -1  -5   6    3.36    0.12 
   1  -5  -6    5.41    0.47 
  -1  -5   6    4.74    0.50 
   1  -5  -6    4.23    0.32 
   1   5  -5    1.03    0.21 
   1   5  -5    0.98    0.10 
  -1   5   5    0.83    0.10 
   1   5  -5    1.01    0.38 
  -1   5   5    1.28    0.40 
  -1  -5   5    1.62    0.32 
  -1  -5   5    0.79    0.09 
   1  -5  -5    1.29    0.27 
   1  -5  -5    1.21    0.37 
  -1  -5   5    1.04    0.12 
   1  -5  -5    0.77    0.11 
   1   5  -4   36.60    0.51 
   1   5  -4   37.27    0.48 
   1   5  -4   36.00    0.53 
  -1   5   4   37.40    0.58 
  -1   5   4   35.88    0.57 
  -1   5   4   35.96    0.42 
   1  -5  -4   36.43    0.46 
  -1  -5   4   35.25    0.44 
  -1  -5   4   37.59    0.52 
  -1  -5   4   36.68    0.51 
   1  -5  -4   37.34    0.66 
   1  -5  -4   36.49    0.51 
  -1   5   3    6.53    0.28 
  -1   5   3    5.37    0.08 
   1   5  -3    5.86    0.20 
  -1   5   3    5.81    0.11 
   1   5  -3    5.99    0.12 
  -1  -5   3    6.49    0.19 
  -1  -5   3    5.85    0.13 
   1  -5  -3    5.44    0.10 
  -1  -5   3    5.33    0.06 
   1  -5  -3    6.54    0.21 
  -1   5   2    0.37    0.10 
   1   5  -2    0.67    0.28 
  -1   5   2    0.24    0.07 
   1   5  -2    0.52    0.11 
  -1   5   2    0.21    0.30 
  -1   5   2    0.34    0.22 
   1   5  -2    0.24    0.19 
  -1  -5   2    0.06    0.16 
   1  -5  -2    0.26    0.06 
  -1  -5   2    0.41    0.28 
  -1  -5   2    0.24    0.09 
   1  -5  -2    0.80    0.23 
   1  -5  -2    0.12    0.28 
   1  -5  -2    0.08    0.11 
   1   5  -1   10.03    0.29 
  -1   5   1    9.41    0.32 
  -1   5   1    9.74    0.25 
   1   5  -1    9.23    0.22 
  -1   5   1    9.42    0.24 
   1   5  -1    9.68    0.17 
   1  -5  -1    9.05    0.21 
   1  -5  -1    9.95    0.27 
  -1  -5   1    9.95    0.30 
  -1  -5   1    9.27    0.21 
  -1  -5   1    9.64    0.17 
   1   5   0    3.02    0.27 
  -1   5   0    3.04    0.12 
  -1   5   0    2.65    0.25 
   1   5   0    2.76    0.25 
   1   5   0    2.25    0.10 
   1   5   0    2.60    0.04 
  -1   5   0    2.81    0.18 
   1   5   0    3.25    0.20 
  -1  -5   0    2.75    0.20 
   1  -5   0    2.76    0.28 
   1  -5   0    2.54    0.05 
  -1  -5   0    3.00    0.18 
   1  -5   0    2.73    0.15 
   1  -5   0    2.83    0.10 
  -1   5  -1  155.18    1.27 
  -1   5  -1  154.96    1.36 
   1   5   1  156.34    1.41 
  -1   5  -1  155.35    1.34 
   1   5   1  155.94    1.34 
   1   5   1  154.18    1.36 
  -1  -5  -1  155.16    1.36 
  -1  -5  -1  155.61    1.35 
   1  -5   1  156.31    1.26 
   1  -5   1  153.20    1.30 
  -1  -5  -1  157.82    1.45 
   1  -5   1  157.31    1.46 
  -1   5  -2    2.63    0.14 
  -1   5  -2    2.67    0.12 
   1   5   2    2.71    0.31 
   1   5   2    2.74    0.18 
   1   5   2    2.39    0.08 
  -1   5  -2    3.17    0.31 
   1  -5   2    2.69    0.14 
  -1  -5  -2    2.43    0.10 
   1  -5   2    2.52    0.13 
   1  -5   2    2.70    0.33 
  -1  -5  -2    2.89    0.16 
  -1  -5  -2    2.88    0.29 
  -1   5  -3    0.42    0.31 
   1   5   3    0.30    0.32 
  -1   5  -3    0.57    0.10 
   1   5   3    0.77    0.23 
   1   5   3    0.47    0.09 
  -1   5  -3    0.46    0.15 
   1  -5   3    0.33    0.26 
   1  -5   3    0.45    0.12 
   1  -5   3    0.43    0.12 
  -1  -5  -3    0.38    0.10 
  -1  -5  -3    0.25    0.23 
  -1  -5  -3    0.64    0.21 
   1   5   4   39.31    0.61 
   1   5   4   38.55    0.69 
   1   5   4   38.45    0.51 
  -1   5  -4   37.65    0.48 
  -1   5  -4   38.72    0.60 
  -1   5  -4   38.40    0.45 
   1  -5   4   37.84    0.55 
  -1  -5  -4   37.92    0.57 
  -1  -5  -4   37.93    0.61 
   1  -5   4   38.85    0.64 
   1   5   5   10.39    0.48 
  -1   5  -5    9.00    0.21 
  -1   5  -5    8.22    0.13 
  -1   5  -5   10.68    0.41 
  -1  -5  -5    9.34    0.31 
   1  -5   5   10.12    0.50 
  -1  -5  -5   10.22    0.45 
   1  -5   5    7.92    0.14 
   1   5   6    0.32    0.14 
   1   5   6    0.24    0.50 
  -1   5  -6   -0.08    0.45 
  -1   5  -6    0.31    0.12 
  -1  -5  -6    0.43    0.18 
   1  -5   6    0.39    0.12 
   1  -5   6    0.51    0.14 
   1  -5   6    0.37    0.51 
  -1  -5  -6    0.23    0.44 
   1   5   7    1.20    0.54 
  -1   5  -7    0.98    0.13 
   1   5   7    0.91    0.11 
  -1   5  -7    0.99    0.39 
   1  -5   7    0.93    0.15 
   1  -5   7    0.92    0.14 
  -1  -5  -7    1.08    0.15 
   1  -5   7    0.57    0.53 
  -1  -5  -7    0.59    0.35 
  -1  -5  -7    1.19    0.50 
   1   5   8   12.37    0.17 
  -1   5  -8   13.19    0.15 
   1   5   8   14.99    0.67 
  -1   5  -8   15.69    0.64 
   1  -5   8   12.79    0.16 
  -1  -5  -8   12.72    0.22 
  -1  -5  -8   16.32    0.65 
  -1  -5  -8   14.10    0.39 
   1  -5   8   13.11    0.17 
   1  -5   8   15.20    0.71 
  -1   5  -9   26.23    0.19 
   1   5   9   28.75    0.78 
  -1   5  -9   29.70    0.87 
   1  -5   9   25.55    0.20 
  -1  -5  -9   25.57    0.27 
  -1  -5  -9   27.53    0.46 
   1  -5   9   25.88    0.22 
   1   5  10    2.57    0.14 
   1   5  10    4.13    0.74 
  -1   5 -10    2.68    0.15 
   1  -5  10    2.33    0.17 
  -1  -5 -10    2.68    0.41 
   1  -5  10    2.49    0.74 
   1  -5  10    2.45    0.20 
  -1  -5 -10    2.10    0.24 
   1   5  11   12.80    0.17 
   1   5  11   14.93    0.86 
   1  -5  11   12.59    0.22 
   1  -5  11   15.14    0.89 
  -1  -5 -11   12.64    0.30 
   1   5  12    2.25    0.88 
   1   5  12    1.28    0.16 
   1  -5  12    0.97    0.21 
  -1  -5 -12    1.35    0.30 
   1  -5  12    0.77    0.65 
   1   5  13    6.24    1.02 
   1  -5  13    5.72    1.00 
   1   5  14    2.23    0.79 
   1  -5  14    3.72    0.99 
   1   5  15    1.40    1.10 
   1  -5  15    0.60    1.04 
   1   5  16    1.46    1.18 
   1  -5  16    3.34    0.89 
  -1   6  17    2.61    1.17 
   1   6 -17    3.65    0.64 
  -1  -6  17    1.78    0.85 
  -1   6  16    1.16    1.12 
   1  -6 -16   -0.42    0.29 
  -1  -6  16   -0.17    1.04 
  -1   6  15    3.61    1.09 
  -1  -6  15    2.67    0.96 
   1  -6 -15    1.65    0.38 
  -1   6  14    2.14    1.00 
  -1  -6  14   -0.03    0.91 
  -1  -6  14   -0.07    0.23 
   1  -6 -14    0.28    0.34 
  -1   6  13   -0.46    0.86 
  -1   6  13    0.16    0.14 
  -1  -6  13    1.85    0.89 
  -1  -6  13   -0.16    0.21 
   1  -6 -13    0.91    0.35 
  -1   6  12    4.33    0.82 
   1   6 -12    4.74    0.15 
  -1   6  12    4.81    0.14 
  -1  -6  12    4.46    0.20 
  -1  -6  12    5.62    0.83 
   1  -6 -12    4.60    0.31 
  -1   6  11   37.77    0.95 
  -1  -6  11   37.54    0.94 
  -1   6  10    0.45    0.69 
   1   6 -10    0.32    0.12 
   1   6 -10    0.48    0.49 
   1  -6 -10   -0.21    0.21 
  -1  -6  10    1.10    0.70 
  -1  -6  10    0.23    0.14 
  -1  -6  10   -0.02    0.18 
  -1   6   9   10.00    0.51 
   1   6  -9    9.42    0.13 
   1   6  -9   10.43    0.61 
   1  -6  -9   10.01    0.40 
  -1  -6   9    9.26    0.17 
  -1  -6   9   10.08    0.63 
   1  -6  -9   11.19    0.61 
  -1  -6   9    9.24    0.14 
   1  -6  -9    9.09    0.21 
  -1   6   8   15.73    0.52 
   1   6  -8   16.61    0.62 
   1  -6  -8   15.14    0.40 
   1  -6  -8   16.46    0.51 
  -1  -6   8   15.56    0.63 
  -1   6   7    3.22    0.52 
  -1   6   7    2.62    0.13 
   1   6  -7    2.82    0.50 
   1   6  -7    2.13    0.25 
   1   6  -7    2.53    0.12 
  -1  -6   7    2.68    0.12 
   1  -6  -7    3.66    0.50 
  -1  -6   7    2.91    0.15 
   1  -6  -7    2.62    0.11 
  -1  -6   7    2.49    0.39 
   1  -6  -7    2.12    0.33 
   1   6  -6    1.44    0.28 
   1   6  -6    1.86    0.46 
   1   6  -6    1.47    0.12 
  -1   6   6    1.32    0.36 
  -1   6   6    1.42    0.12 
   1  -6  -6    1.44    0.34 
   1  -6  -6    1.40    0.13 
   1  -6  -6    1.78    0.45 
  -1  -6   6    1.46    0.37 
   1   6  -5  121.81    1.14 
  -1   6   5  121.28    1.13 
  -1   6   5  122.12    1.21 
   1   6  -5  122.58    1.02 
   1   6  -5  123.59    1.12 
  -1   6   5  121.33    1.00 
  -1  -6   5  122.59    1.12 
  -1  -6   5  121.12    1.10 
   1  -6  -5  121.83    1.23 
   1  -6  -5  121.08    1.29 
  -1  -6   5  120.82    1.10 
   1  -6  -5  122.34    1.10 
   1   6  -4   14.57    0.25 
   1   6  -4   13.30    0.12 
  -1   6   4   13.37    0.12 
  -1   6   4   12.84    0.10 
   1  -6  -4   12.78    0.11 
  -1  -6   4   15.59    0.43 
   1  -6  -4   14.34    0.30 
  -1  -6   4   13.29    0.14 
  -1   6   3   72.74    0.74 
   1   6  -3   71.98    0.74 
  -1   6   3   73.03    0.89 
   1   6  -3   73.40    0.78 
   1   6  -3   72.51    0.74 
  -1   6   3   74.34    0.84 
  -1   6   3   71.15    0.76 
   1  -6  -3   72.41    0.80 
  -1  -6   3   71.88    0.74 
  -1  -6   3   73.40    0.83 
   1  -6  -3   72.10    0.86 
   1  -6  -3   74.16    0.83 
  -1  -6   3   72.18    0.75 
  -1   6   2    4.03    0.07 
   1   6  -2    4.31    0.12 
  -1   6   2    5.28    0.34 
   1   6  -2    4.78    0.24 
   1   6  -2    4.58    0.21 
  -1   6   2    4.58    0.24 
  -1   6   2    4.16    0.09 
  -1  -6   2    4.92    0.25 
  -1  -6   2    4.06    0.13 
   1  -6  -2    4.14    0.08 
  -1  -6   2    4.48    0.18 
   1  -6  -2    4.67    0.18 
   1  -6  -2    5.13    0.32 
   1  -6  -2    4.04    0.10 
   1   6  -1   41.34    0.38 
  -1   6   1   41.58    0.38 
  -1   6   1   42.08    0.50 
   1   6  -1   41.22    0.27 
   1   6  -1   41.98    0.51 
   1   6  -1   42.03    0.54 
  -1   6   1   41.86    0.42 
  -1   6   1   42.57    0.55 
  -1   6   1   42.01    0.43 
  -1  -6   1   41.74    0.47 
  -1  -6   1   41.28    0.46 
   1  -6  -1   41.58    0.45 
   1  -6  -1   42.23    0.51 
  -1  -6   1   42.31    0.30 
   1  -6  -1   42.38    0.41 
   1   6   0   61.41    0.51 
   1   6   0   61.57    0.59 
  -1   6   0   60.69    0.59 
  -1   6   0   59.79    0.55 
  -1   6   0   60.50    0.62 
   1   6   0   60.19    0.62 
   1   6   0   58.84    0.65 
   1   6   0   60.18    0.60 
  -1   6   0   60.09    0.51 
   1  -6   0   60.91    0.59 
  -1  -6   0   61.77    0.63 
  -1  -6   0   59.36    0.59 
   1  -6   0   59.27    0.71 
   1  -6   0   59.96    0.56 
  -1  -6   0   60.98    0.55 
   1  -6   0   59.30    0.62 
  -1   6  -1   45.73    0.53 
  -1   6  -1   45.88    0.48 
  -1   6  -1   45.69    0.47 
   1   6   1   45.58    0.47 
   1   6   1   45.44    0.54 
   1   6   1   46.15    0.59 
  -1  -6  -1   45.67    0.54 
   1  -6   1   45.51    0.46 
  -1  -6  -1   46.49    0.61 
   1  -6   1   45.85    0.53 
  -1  -6  -1   45.51    0.51 
   1  -6   1   46.07    0.45 
   1  -6   1   44.24    0.42 
  -1   6  -2   38.99    0.53 
  -1   6  -2   39.04    0.46 
   1   6   2   38.80    0.48 
   1   6   2   39.51    0.55 
  -1   6  -2   39.27    0.46 
   1   6   2   39.86    0.54 
  -1  -6  -2   39.45    0.46 
  -1  -6  -2   39.36    0.65 
   1  -6   2   38.65    0.39 
   1  -6   2   39.65    0.51 
  -1  -6  -2   38.75    0.50 
   1  -6   2   39.43    0.55 
   1   6   3   94.19    0.91 
   1   6   3   93.48    0.88 
  -1   6  -3   93.19    0.71 
  -1   6  -3   93.83    0.82 
   1   6   3   93.14    0.85 
  -1   6  -3   94.16    0.80 
  -1  -6  -3   93.25    1.02 
  -1  -6  -3   91.51    0.81 
   1  -6   3   95.58    0.83 
  -1  -6  -3   93.16    0.77 
   1  -6   3   93.40    0.67 
   1  -6   3   93.54    0.87 
   1   6   4    2.68    0.26 
   1   6   4    2.46    0.31 
  -1   6  -4    2.18    0.17 
  -1   6  -4    2.26    0.11 
   1   6   4    2.16    0.08 
  -1   6  -4    2.85    0.30 
  -1  -6  -4    2.15    0.12 
   1  -6   4    2.66    0.41 
  -1  -6  -4    2.61    0.37 
  -1  -6  -4    2.55    0.20 
   1  -6   4    2.36    0.14 
  -1   6  -5    3.87    0.17 
  -1   6  -5    3.82    0.11 
   1   6   5    3.87    0.12 
   1   6   5    4.09    0.44 
   1   6   5    4.47    0.29 
  -1   6  -5    4.05    0.33 
   1  -6   5    3.79    0.14 
  -1  -6  -5    4.03    0.41 
  -1  -6  -5    3.87    0.28 
  -1  -6  -5    3.89    0.15 
   1  -6   5    3.83    0.35 
  -1   6  -6    0.24    0.20 
   1   6   6    0.13    0.13 
   1   6   6    0.33    0.51 
  -1   6  -6    0.06    0.36 
  -1   6  -6    0.12    0.12 
   1  -6   6    0.03    0.51 
   1  -6   6    0.34    0.17 
  -1  -6  -6    0.21    0.31 
  -1  -6  -6    0.23    0.18 
   1  -6   6    0.04    0.12 
  -1  -6  -6    0.40    0.45 
   1   6   7   29.56    0.20 
  -1   6  -7   30.12    0.18 
  -1  -6  -7   29.75    0.24 
   1  -6   7   29.58    0.17 
   1  -6   7   30.28    0.22 
  -1   6  -8   16.95    0.17 
   1   6   8   16.36    0.27 
  -1   6  -8   20.04    0.67 
   1   6   8   19.52    0.59 
  -1   6  -8   18.17    0.33 
   1  -6   8   17.04    0.20 
  -1  -6  -8   15.99    0.23 
  -1  -6  -8   20.41    0.68 
  -1  -6  -8   18.32    0.41 
   1  -6   8   16.31    0.16 
   1  -6   8   19.62    0.60 
  -1   6  -9    4.78    0.14 
   1   6   9    5.01    0.65 
  -1  -6  -9    4.75    0.22 
   1  -6   9    4.83    0.14 
   1  -6   9    5.35    0.67 
   1  -6   9    4.58    0.19 
  -1  -6  -9    4.53    0.37 
   1   6  10    2.86    0.75 
  -1   6 -10    1.80    0.14 
  -1  -6 -10    1.52    0.26 
   1  -6  10    1.83    0.56 
   1  -6  10    1.47    0.20 
   1  -6  10    1.75    0.17 
  -1   6 -11   11.07    0.19 
   1   6  11   11.01    0.18 
   1   6  11   12.84    0.72 
   1  -6  11   10.66    0.23 
   1  -6  11   13.50    0.74 
  -1  -6 -11   10.30    0.31 
   1   6  12    2.14    0.16 
   1   6  12    2.13    0.66 
  -1  -6 -12    1.54    0.29 
   1  -6  12    1.57    0.22 
   1  -6  12    2.00    0.66 
   1   6  13    1.80    0.93 
   1   6  13    1.66    0.18 
  -1  -6 -13    1.68    0.35 
   1  -6  13    1.71    0.25 
   1  -6  13    3.13    0.95 
   1   6  14    6.11    1.08 
   1  -6  14    3.95    0.99 
   1  -6  14    3.07    0.25 
  -1   6 -15    1.48    0.48 
   1   6  15    1.36    1.13 
   1  -6  15    0.42    0.79 
   1   6  16    5.14    0.93 
   1  -6  16    4.24    1.13 
  -1  -7  17   -0.08    1.10 
  -1   7  16    1.67    1.11 
   1   7 -16    1.60    0.59 
   1  -7 -16   -0.52    0.39 
  -1  -7  16    1.38    1.02 
  -1   7  15    0.32    0.83 
   1   7 -15    1.85    0.54 
   1  -7 -15   -0.28    0.38 
  -1  -7  15   -0.99    0.96 
   1   7 -14    3.21    0.52 
  -1   7  14    3.49    1.01 
   1  -7 -14    1.40    0.35 
  -1  -7  14    3.40    0.97 
  -1  -7  14    1.78    0.32 
  -1   7  13    5.12    0.15 
   1   7 -13    5.56    0.43 
  -1   7  13    6.00    0.96 
  -1  -7  13    4.69    0.24 
   1  -7 -13    5.15    0.36 
  -1  -7  13    5.73    0.89 
  -1   7  12    3.64    0.68 
  -1   7  12    3.02    0.13 
   1   7 -12    3.29    0.15 
   1   7 -12    3.54    0.41 
  -1  -7  12    2.88    0.80 
   1  -7 -12    2.84    0.31 
  -1  -7  12    2.40    0.22 
   1   7 -11    1.65    0.36 
   1   7 -11    1.59    0.15 
  -1   7  11    2.48    0.77 
  -1  -7  11    1.08    0.20 
  -1  -7  11    1.67    0.16 
  -1  -7  11    1.51    0.76 
  -1   7  10    5.76    0.76 
   1   7 -10    5.22    0.64 
   1   7 -10    4.92    0.39 
   1   7 -10    4.35    0.15 
  -1  -7  10    3.85    0.69 
   1  -7 -10    4.04    0.19 
  -1  -7  10    4.05    0.14 
  -1  -7  10    4.25    0.19 
   1   7  -9   33.20    0.76 
   1   7  -9   29.46    0.19 
   1   7  -9   30.74    0.41 
  -1  -7   9   28.75    0.18 
  -1  -7   9   29.17    0.23 
   1  -7  -9   28.84    0.22 
  -1  -7   9   31.54    0.77 
   1  -7  -9   33.11    0.74 
   1   7  -8    1.59    0.13 
   1   7  -8    2.50    0.57 
   1   7  -8    1.96    0.32 
  -1   7   8    1.45    0.14 
  -1   7   8    2.41    0.59 
  -1  -7   8    1.45    0.12 
   1  -7  -8    1.58    0.17 
  -1  -7   8    2.05    0.60 
   1  -7  -8    2.64    0.55 
  -1  -7   8    1.30    0.17 
   1  -7  -8    1.71    0.37 
   1   7  -7   15.64    0.36 
  -1   7   7   13.52    0.16 
  -1  -7   7   13.89    0.16 
   1  -7  -7   16.02    0.46 
   1  -7  -7   13.50    0.19 
  -1  -7   7   14.20    0.20 
  -1   7   6    6.41    0.13 
  -1   7   6    6.12    0.11 
   1   7  -6    7.93    0.42 
   1   7  -6    6.35    0.13 
  -1   7   6    7.70    0.54 
   1   7  -6    7.00    0.31 
  -1  -7   6    7.24    0.52 
   1  -7  -6    7.30    0.30 
  -1  -7   6    6.34    0.11 
  -1  -7   6    6.65    0.17 
   1  -7  -6    6.09    0.15 
   1  -7  -6    7.98    0.51 
   1   7  -5   55.10    0.76 
  -1   7   5   54.89    0.69 
   1   7  -5   54.58    0.63 
  -1   7   5   55.24    0.81 
   1   7  -5   54.19    0.69 
  -1   7   5   54.74    0.61 
  -1  -7   5   54.43    0.75 
   1  -7  -5   54.82    0.91 
   1  -7  -5   54.95    0.76 
   1  -7  -5   55.21    0.83 
  -1  -7   5   56.19    0.70 
  -1  -7   5   54.34    0.78 
  -1   7   4    6.46    0.08 
   1   7  -4    7.26    0.24 
   1   7  -4    6.59    0.12 
  -1   7   4    7.49    0.42 
  -1   7   4    7.40    0.25 
  -1   7   4    6.61    0.12 
   1   7  -4    7.83    0.40 
  -1  -7   4    6.78    0.15 
   1  -7  -4    8.08    0.41 
  -1  -7   4    8.07    0.41 
   1  -7  -4    7.05    0.29 
  -1  -7   4    7.25    0.21 
   1  -7  -4    6.54    0.10 
   1   7  -3   11.68    0.24 
  -1   7   3   12.68    0.42 
   1   7  -3   12.83    0.39 
  -1   7   3   12.21    0.30 
   1  -7  -3   13.13    0.34 
  -1  -7   3   12.62    0.39 
   1  -7  -3   11.95    0.29 
  -1  -7   3   11.80    0.23 
   1   7  -2   72.73    0.74 
  -1   7   2   72.41    0.77 
  -1   7   2   71.97    0.70 
  -1   7   2   72.84    0.80 
   1   7  -2   71.97    0.66 
  -1   7   2   71.54    0.72 
   1   7  -2   73.35    0.73 
   1  -7  -2   72.40    0.69 
  -1  -7   2   73.09    0.47 
  -1  -7   2   72.39    0.81 
   1  -7  -2   71.63    0.67 
   1  -7  -2   72.89    0.74 
   1  -7  -2   73.23    0.74 
  -1  -7   2   72.59    0.67 
  -1  -7   2   72.77    0.69 
   1   7  -1    0.12    0.20 
  -1   7   1    0.53    0.22 
  -1   7   1    0.28    0.11 
   1   7  -1    0.34    0.29 
  -1   7   1    0.02    0.32 
   1   7  -1    0.18    0.11 
   1   7  -1    0.10    0.03 
  -1   7   1    0.36    0.29 
  -1   7   1    0.12    0.06 
  -1  -7   1    0.11    0.23 
   1  -7  -1    0.44    0.19 
  -1  -7   1    0.11    0.04 
   1  -7  -1    0.12    0.06 
  -1  -7   1    0.16    0.19 
  -1  -7   1   -0.05    0.13 
   1  -7  -1    0.19    0.13 
  -1   7   0   83.28    0.66 
   1   7   0   85.32    0.80 
   1   7   0   85.14    0.83 
   1   7   0   83.79    0.63 
  -1   7   0   85.33    0.82 
   1   7   0   83.18    0.75 
  -1   7   0   83.67    0.77 
   1   7   0   85.09    0.83 
  -1   7   0   84.38    0.73 
  -1  -7   0   86.19    0.80 
   1  -7   0   84.21    0.68 
   1  -7   0   84.79    0.87 
   1  -7   0   84.67    0.75 
  -1  -7   0   85.48    0.72 
  -1  -7   0   84.78    0.78 
   1  -7   0   84.27    0.80 
  -1   7  -1    4.62    0.13 
   1   7   1    5.39    0.26 
   1   7   1    4.22    0.09 
   1   7   1    4.85    0.24 
  -1   7  -1    5.24    0.21 
   1   7   1    5.27    0.28 
  -1   7  -1    4.83    0.33 
  -1  -7  -1    5.49    0.33 
   1  -7   1    5.13    0.18 
   1  -7   1    4.52    0.15 
  -1  -7  -1    4.64    0.21 
   1  -7   1    5.74    0.36 
  -1   7  -2   20.87    0.35 
   1   7   2   21.23    0.43 
  -1   7  -2   19.81    0.23 
   1   7   2   19.45    0.28 
  -1  -7  -2   19.45    0.27 
   1  -7   2   21.08    0.34 
  -1  -7  -2   21.71    0.42 
   1  -7   2   20.99    0.43 
  -1   7  -3    6.98    0.41 
   1   7   3    5.83    0.27 
  -1   7  -3    5.76    0.18 
   1   7   3    6.44    0.40 
   1  -7   3    5.67    0.18 
  -1  -7  -3    6.38    0.32 
   1  -7   3    6.58    0.42 
   1  -7   3    5.13    0.16 
  -1  -7  -3    5.88    0.21 
   1   7   4   32.83    0.68 
  -1   7  -4   33.57    0.50 
   1   7   4   34.74    0.69 
  -1   7  -4   33.13    0.63 
   1   7   4   33.78    0.65 
  -1   7  -4   33.71    0.56 
  -1  -7  -4   33.32    0.65 
   1  -7   4   33.93    0.66 
  -1  -7  -4   31.87    0.60 
   1  -7   4   33.24    0.55 
   1   7   5    1.57    0.31 
  -1   7  -5    1.68    0.45 
  -1   7  -5    1.15    0.19 
  -1   7  -5    1.56    0.12 
   1   7   5    1.28    0.12 
   1   7   5    1.47    0.35 
  -1  -7  -5    1.35    0.16 
  -1  -7  -5    1.70    0.42 
   1  -7   5    1.34    0.48 
   1  -7   5    1.43    0.16 
  -1   7  -6    3.77    0.23 
   1   7   6    3.68    0.13 
  -1   7  -6    3.78    0.14 
   1   7   6    4.47    0.53 
  -1   7  -6    3.60    0.49 
  -1  -7  -6    3.88    0.18 
  -1  -7  -6    4.70    0.36 
   1  -7   6    3.81    0.41 
   1  -7   6    3.61    0.15 
  -1  -7  -6    3.59    0.47 
  -1   7  -7    2.13    0.25 
  -1   7  -7    1.95    0.13 
   1   7   7    3.34    0.58 
   1   7   7    1.94    0.14 
  -1   7  -7    2.87    0.54 
   1  -7   7    2.03    0.12 
  -1  -7  -7    2.67    0.52 
  -1  -7  -7    2.19    0.35 
   1  -7   7    2.07    0.17 
   1  -7   7    2.63    0.47 
  -1  -7  -7    1.96    0.18 
   1   7   8   12.07    0.65 
  -1   7  -8   11.18    0.30 
  -1   7  -8   10.56    0.15 
  -1   7  -8   12.35    0.63 
   1  -7   8   11.86    0.66 
  -1  -7  -8   12.57    0.62 
  -1  -7  -8   10.21    0.22 
   1  -7   8   10.36    0.15 
   1  -7   8   10.37    0.19 
  -1  -7  -8   11.11    0.40 
  -1   7  -9   54.39    0.80 
  -1   7  -9   53.70    0.75 
   1   7   9   54.83    0.98 
   1  -7   9   55.67    0.99 
   1  -7   9   54.17    0.85 
  -1  -7  -9   51.49    0.64 
   1  -7   9   54.08    0.87 
  -1  -7 -10   22.18    0.33 
   1  -7  10   23.71    0.30 
   1  -7  10   22.67    0.24 
   1   7  11    5.76    0.90 
  -1   7 -11    3.52    0.17 
  -1   7 -11    3.84    0.36 
   1  -7  11    3.97    0.65 
  -1  -7 -11    3.04    0.30 
   1  -7  11    3.15    0.23 
   1   7  12    2.43    0.93 
  -1   7 -12    2.02    0.41 
   1   7  12    1.63    0.17 
  -1   7 -12    1.52    0.16 
   1  -7  12    2.23    0.69 
   1  -7  12    1.13    0.24 
  -1  -7 -12    1.34    0.33 
  -1   7 -13    0.88    0.43 
   1   7  13    1.11    0.98 
   1   7  13    0.06    0.18 
  -1  -7 -13   -0.74    0.35 
   1  -7  13    0.14    0.72 
   1  -7  13   -0.74    0.24 
  -1   7 -14   19.65    0.52 
   1   7  14   21.14    1.16 
   1  -7  14   19.36    1.08 
   1   7  15    2.46    0.90 
  -1   7 -15    2.18    0.51 
   1  -7  15    1.75    1.08 
   1   7  16    1.69    1.18 
   1  -7  16    1.15    0.88 
  -1   8  16    1.70    1.18 
   1   8 -16    1.20    0.57 
   1  -8 -16    0.05    0.42 
  -1  -8  16    0.91    1.07 
   1   8 -15    6.27    0.51 
  -1   8  15    5.38    1.07 
   1  -8 -15    4.31    0.39 
  -1  -8  15    5.31    1.03 
  -1   8  14    2.60    0.98 
   1   8 -14    3.35    0.47 
  -1  -8  14    3.36    0.95 
  -1  -8  14    2.35    0.27 
   1  -8 -14    2.22    0.38 
  -1   8  13    0.40    0.15 
   1   8 -13    0.61    0.48 
  -1   8  13    0.96    0.93 
  -1  -8  13    0.38    0.24 
   1  -8 -13   -0.28    0.33 
  -1  -8  13    0.62    0.87 
  -1   8  12    1.37    0.16 
   1   8 -12    1.22    0.16 
   1   8 -12    1.55    0.45 
  -1   8  12    1.11    0.87 
   1  -8 -12    0.75    0.24 
  -1  -8  12    2.31    0.87 
  -1  -8  12    0.68    0.23 
  -1   8  11    2.90    0.15 
  -1   8  11    1.96    0.79 
   1   8 -11    2.66    0.38 
   1   8 -11    2.55    0.16 
  -1  -8  11    1.58    0.77 
  -1  -8  11    2.03    0.22 
  -1  -8  11    2.24    0.16 
   1  -8 -11    2.51    0.30 
   1   8 -10    5.60    0.15 
  -1   8  10    6.36    0.74 
  -1   8  10    5.85    0.15 
   1   8 -10    6.39    0.41 
  -1  -8  10    5.64    0.16 
  -1  -8  10    5.41    0.22 
   1  -8 -10    5.34    0.26 
  -1  -8  10    5.82    0.73 
   1   8  -9   36.63    0.89 
  -1   8   9   37.95    0.66 
   1   8  -9   37.11    0.70 
  -1   8   9   36.63    0.84 
   1   8  -9   37.24    0.91 
  -1  -8   9   36.62    0.84 
  -1  -8   9   38.98    0.96 
   1  -8  -9   37.67    0.81 
  -1   8   8    4.15    0.14 
   1   8  -8    4.76    0.33 
   1   8  -8    5.64    0.61 
   1   8  -8    4.02    0.14 
  -1   8   8    5.66    0.63 
  -1  -8   8    3.92    0.18 
   1  -8  -8    4.51    0.41 
  -1  -8   8    5.78    0.65 
   1  -8  -8    6.45    0.61 
   1  -8  -8    3.98    0.15 
  -1  -8   8    4.01    0.13 
  -1   8   7   35.13    0.88 
   1   8  -7   33.69    0.61 
  -1   8   7   34.76    0.65 
  -1   8   7   33.14    0.89 
   1   8  -7   34.41    0.83 
   1   8  -7   34.16    0.72 
  -1  -8   7   33.37    0.78 
  -1  -8   7   35.34    0.88 
  -1  -8   7   36.30    0.82 
   1  -8  -7   32.89    0.89 
   1  -8  -7   35.19    0.71 
   1   8  -6   57.93    0.71 
  -1   8   6   58.72    0.87 
  -1   8   6   58.25    0.63 
   1   8  -6   57.98    0.65 
   1   8  -6   58.66    0.82 
  -1  -8   6   59.42    0.75 
  -1  -8   6   59.05    0.86 
   1  -8  -6   58.49    0.81 
  -1  -8   6   58.83    0.82 
   1  -8  -6   58.53    0.82 
  -1   8   5   60.01    0.80 
  -1   8   5   60.96    0.84 
   1   8  -5   61.98    0.70 
   1   8  -5   60.26    0.71 
   1   8  -5   60.65    0.77 
  -1   8   5   59.47    0.66 
   1  -8  -5   60.73    0.78 
  -1  -8   5   63.80    0.77 
   1  -8  -5   59.04    0.72 
   1  -8  -5   62.17    0.80 
  -1  -8   5   61.52    0.82 
  -1   8   4    0.42    0.09 
  -1   8   4    0.46    0.29 
   1   8  -4    0.53    0.12 
   1   8  -4    0.83    0.38 
   1   8  -4    0.82    0.24 
  -1   8   4    0.95    0.42 
  -1   8   4    0.51    0.13 
  -1  -8   4    0.89    0.33 
  -1  -8   4    0.51    0.15 
   1  -8  -4    0.56    0.28 
   1  -8  -4    0.51    0.11 
  -1  -8   4    0.61    0.20 
   1  -8  -4    0.39    0.39 
   1   8  -3   11.23    0.17 
   1   8  -3   11.18    0.09 
  -1   8   3   11.50    0.22 
  -1   8   3   10.93    0.10 
  -1   8   3   10.96    0.07 
  -1   8   3   11.80    0.39 
   1   8  -3   11.19    0.35 
  -1  -8   3   11.46    0.37 
  -1  -8   3   11.25    0.15 
   1  -8  -3   11.05    0.25 
  -1  -8   3   10.98    0.13 
   1  -8  -3   11.52    0.28 
   1  -8  -3   11.08    0.10 
  -1   8   2    0.81    0.19 
   1   8  -2    0.53    0.09 
  -1   8   2    0.60    0.07 
  -1   8   2    0.85    0.32 
   1   8  -2    0.95    0.22 
   1   8  -2    0.98    0.31 
  -1   8   2    0.59    0.11 
  -1   8   2    0.72    0.36 
  -1  -8   2    0.81    0.19 
  -1  -8   2    0.46    0.10 
  -1  -8   2    1.11    0.34 
  -1  -8   2    0.60    0.04 
   1  -8  -2    0.77    0.12 
   1  -8  -2    0.62    0.33 
   1  -8  -2    0.59    0.06 
   1  -8  -2    0.52    0.22 
  -1   8   1   70.69    0.72 
   1   8  -1   67.81    0.63 
   1   8  -1   67.45    0.67 
  -1   8   1   68.46    0.58 
  -1   8   1   68.29    0.60 
  -1   8   1   68.44    0.61 
   1   8  -1   68.36    0.66 
  -1   8   1   68.69    0.57 
   1   8  -1   68.01    0.43 
   1  -8  -1   68.12    0.60 
  -1  -8   1   68.32    0.73 
  -1  -8   1   68.80    0.49 
  -1  -8   1   68.87    0.67 
   1  -8  -1   68.35    0.64 
   1  -8  -1   68.56    0.72 
  -1  -8   1   68.40    0.64 
  -1   8   0    4.55    0.06 
   1   8   0    6.70    0.38 
  -1   8   0    5.08    0.14 
  -1   8   0    5.97    0.24 
   1   8   0    6.77    0.36 
   1   8   0    4.91    0.11 
   1   8   0    5.62    0.25 
   1   8   0    4.67    0.06 
  -1  -8   0    4.77    0.07 
   1  -8   0    4.65    0.07 
   1  -8   0    5.97    0.22 
   1  -8   0    5.03    0.12 
   1  -8   0    6.23    0.37 
  -1  -8   0    5.72    0.24 
   1   8   1    8.09    0.25 
   1   8   1    7.59    0.12 
   1   8   1    7.84    0.24 
   1   8   1    7.58    0.06 
  -1   8  -1    8.46    0.34 
  -1   8  -1    7.93    0.21 
  -1   8  -1    7.74    0.12 
   1   8   1    8.07    0.34 
   1  -8   1    7.74    0.15 
  -1  -8  -1    8.24    0.22 
   1  -8   1    7.52    0.06 
  -1  -8  -1    7.56    0.07 
  -1  -8  -1    8.30    0.33 
   1  -8   1    8.42    0.36 
   1  -8   1    7.92    0.18 
  -1   8  -2   98.57    0.78 
   1   8   2   98.01    0.92 
  -1   8  -2  100.11    0.90 
   1   8   2   99.16    0.84 
  -1   8  -2   98.63    0.81 
   1   8   2   98.85    0.87 
   1   8   2   99.65    0.84 
  -1  -8  -2   99.02    0.95 
   1  -8   2   98.56    0.91 
   1  -8   2   99.05    0.76 
  -1  -8  -2   98.72    0.87 
  -1  -8  -2  100.84    0.83 
   1  -8   2   98.28    0.97 
   1   8   3   32.50    0.69 
   1   8   3   31.06    0.55 
  -1   8  -3   32.60    0.51 
  -1   8  -3   32.01    0.53 
  -1   8  -3   33.00    0.65 
   1   8   3   32.40    0.64 
  -1  -8  -3   33.54    0.55 
   1  -8   3   33.33    0.67 
  -1  -8  -3   32.04    0.63 
   1  -8   3   32.39    0.47 
   1  -8   3   33.61    0.72 
  -1  -8  -3   32.23    0.76 
  -1   8  -4    0.74    0.19 
   1   8   4    0.39    0.10 
   1   8   4    0.69    0.33 
  -1   8  -4    0.37    0.13 
  -1   8  -4    0.74    0.32 
   1   8   4    0.49    0.30 
   1  -8   4    0.52    0.16 
  -1  -8  -4    0.53    0.13 
   1  -8   4    0.24    0.33 
  -1  -8  -4    0.36    0.26 
   1  -8   4    0.67    0.17 
  -1  -8  -4    0.90    0.40 
  -1   8  -5    7.67    0.44 
  -1   8  -5    6.54    0.26 
   1   8   5    7.42    0.39 
   1   8   5    7.24    0.55 
  -1  -8  -5    7.73    0.37 
  -1  -8  -5    7.01    0.50 
   1  -8   5    7.46    0.56 
   1   8   6   33.08    0.69 
   1   8   6   32.60    0.67 
  -1   8  -6   33.69    0.65 
   1   8   6   33.58    0.90 
  -1   8  -6   33.11    0.58 
  -1   8  -6   32.87    0.80 
  -1  -8  -6   33.01    0.77 
  -1  -8  -6   35.44    0.93 
   1  -8   6   33.26    0.84 
   1   8   7   10.20    0.60 
  -1   8  -7    9.62    0.25 
  -1   8  -7    9.14    0.14 
  -1   8  -7   10.14    0.50 
   1   8   7    9.20    0.12 
   1  -8   7    9.18    0.20 
   1  -8   7    9.40    0.13 
  -1  -8  -7   10.40    0.55 
  -1  -8  -7    9.70    0.39 
  -1  -8  -7    9.25    0.16 
   1  -8   7    9.13    0.58 
  -1   8  -8    3.58    0.16 
  -1   8  -8    4.21    0.30 
   1   8   8    4.92    0.53 
  -1   8  -8    4.45    0.62 
  -1  -8  -8    3.64    0.23 
   1  -8   8    3.51    0.18 
   1  -8   8    3.69    0.15 
  -1  -8  -8    4.22    0.42 
   1  -8   8    4.07    0.65 
   1   8   9   28.77    0.82 
  -1   8  -9   25.53    0.21 
  -1   8  -9   26.95    0.37 
   1  -8   9   25.00    0.20 
   1  -8   9   25.39    0.27 
   1  -8   9   28.50    0.84 
  -1  -8  -9   24.70    0.25 
  -1   8 -10    2.38    0.17 
  -1   8 -10    2.50    0.34 
   1   8  10    2.86    0.77 
   1  -8  10    2.74    0.24 
  -1  -8 -10    2.72    0.30 
   1  -8  10    2.33    0.77 
  -1   8 -11    1.34    0.18 
   1   8  11    2.90    0.88 
  -1   8 -11    1.87    0.38 
  -1  -8 -11    0.59    0.23 
   1  -8  11    1.39    0.82 
   1  -8  11    0.73    0.25 
  -1   8 -12    1.43    0.20 
   1   8  12    2.44    0.91 
  -1   8 -12    1.91    0.41 
   1   8  12    1.53    0.17 
  -1  -8 -12    1.89    0.37 
   1  -8  12    1.06    0.66 
   1  -8  12    2.07    0.28 
   1   8  13    9.56    0.98 
  -1   8 -13    9.60    0.47 
   1   8  13    8.33    0.19 
   1  -8  13    9.16    0.77 
  -1  -8 -13    7.50    0.37 
   1  -8  13    7.36    0.27 
   1   8  14    2.21    1.03 
  -1   8 -14    2.15    0.47 
   1  -8  14    1.45    0.80 
  -1  -8 -14    0.29    0.39 
   1   8  15    5.91    1.12 
   1  -8  15    5.67    1.09 
   1   8  16    0.24    1.17 
   1  -8  16    0.13    1.12 
   1   9 -16    0.43    0.54 
  -1   9  16    0.59    1.18 
  -1  -9  16   -1.10    1.06 
   1  -9 -16   -0.77    0.43 
   1   9 -15    0.75    0.58 
  -1   9  15    0.99    1.10 
   1  -9 -15    0.61    0.43 
  -1  -9  15    1.96    1.04 
   1   9 -14    1.03    0.53 
  -1   9  14   -0.72    1.00 
   1  -9 -14   -0.21    0.29 
  -1  -9  14   -0.43    0.27 
  -1  -9  14   -0.35    0.72 
  -1   9  13    0.20    0.94 
   1   9 -13    0.70    0.45 
  -1   9  13    1.03    0.15 
  -1  -9  13    1.90    0.91 
   1  -9 -13   -0.27    0.35 
  -1  -9  13    0.57    0.25 
  -1   9  12    3.94    0.70 
   1   9 -12    3.50    0.17 
   1   9 -12    3.73    0.48 
  -1   9  12    3.30    0.18 
  -1  -9  12    3.57    0.26 
  -1  -9  12    3.31    0.33 
   1  -9 -12    2.78    0.34 
  -1  -9  12    2.44    0.83 
   1   9 -11   15.65    0.48 
   1   9 -11   14.06    0.21 
  -1   9  11   18.54    0.97 
  -1   9  11   14.12    0.21 
  -1  -9  11   13.59    0.20 
  -1  -9  11   13.56    0.27 
  -1  -9  11   16.93    0.92 
   1  -9 -11   13.56    0.33 
   1   9 -10    2.00    0.16 
  -1   9  10    1.83    0.57 
   1   9 -10    2.23    0.40 
  -1   9  10    2.39    0.16 
  -1  -9  10    1.53    0.23 
  -1  -9  10    2.58    0.75 
  -1  -9  10    2.30    0.16 
  -1   9   9    0.42    0.14 
   1   9  -9   -0.02    0.15 
  -1   9   9    0.70    0.68 
   1   9  -9    0.25    0.36 
   1   9  -9    0.26    0.63 
  -1  -9   9    0.22    0.67 
  -1  -9   9   -0.42    0.21 
   1  -9  -9   -0.20    0.21 
  -1  -9   9    0.15    0.13 
  -1   9   8    3.45    0.47 
  -1   9   8    3.53    0.15 
   1   9  -8    3.38    0.31 
   1   9  -8    3.80    0.57 
   1   9  -8    3.19    0.14 
   1  -9  -8    3.18    0.17 
  -1  -9   8    3.48    0.47 
   1  -9  -8    3.62    0.55 
  -1  -9   8    3.12    0.20 
  -1  -9   8    3.32    0.12 
   1   9  -7   83.94    0.95 
  -1   9   7   83.83    0.93 
   1   9  -7   83.97    0.98 
   1   9  -7   84.53    1.10 
  -1   9   7   84.14    1.15 
  -1   9   7   83.97    1.15 
   1  -9  -7   83.82    1.14 
  -1  -9   7   85.22    0.97 
   1  -9  -7   85.18    1.10 
  -1  -9   7   83.05    1.12 
   1  -9  -7   82.69    1.16 
  -1  -9   7   83.96    1.13 
  -1   9   6    2.02    0.09 
   1   9  -6    2.05    0.49 
   1   9  -6    2.15    0.14 
  -1   9   6    2.41    0.53 
  -1   9   6    2.03    0.13 
   1   9  -6    2.21    0.28 
   1  -9  -6    2.03    0.15 
  -1  -9   6    2.26    0.10 
  -1  -9   6    2.22    0.51 
   1  -9  -6    2.56    0.38 
  -1  -9   6    2.61    0.21 
   1  -9  -6    2.28    0.37 
  -1   9   5  165.04    1.55 
  -1   9   5  163.95    1.69 
   1   9  -5  164.85    1.56 
   1   9  -5  165.06    1.60 
  -1   9   5  164.58    1.78 
   1   9  -5  165.37    1.66 
  -1   9   5  164.56    1.68 
  -1  -9   5  163.29    1.66 
   1  -9  -5  166.28    1.77 
   1  -9  -5  165.44    1.83 
   1  -9  -5  164.06    1.65 
  -1  -9   5  163.55    1.68 
  -1   9   4    0.06    0.13 
  -1   9   4   -0.05    0.45 
  -1   9   4    0.53    0.31 
   1   9  -4    0.58    0.14 
  -1   9   4    0.24    0.09 
   1   9  -4    0.60    0.26 
   1   9  -4    0.25    0.41 
   1  -9  -4    0.40    0.30 
   1  -9  -4    0.34    0.12 
  -1  -9   4    0.66    0.43 
   1  -9  -4    0.79    0.42 
  -1  -9   4    0.58    0.22 
  -1   9   3   90.73    0.90 
  -1   9   3   90.90    0.83 
   1   9  -3   89.60    0.89 
  -1   9   3   90.35    1.02 
   1   9  -3   90.95    0.85 
   1   9  -3   91.27    0.90 
  -1   9   3   90.42    0.98 
   1  -9  -3   91.41    0.99 
   1  -9  -3   91.29    0.97 
   1  -9  -3   91.82    0.96 
  -1  -9   3   89.20    0.83 
  -1  -9   3   89.86    0.86 
  -1  -9   3   91.73    1.03 
  -1  -9   3   90.35    0.62 
  -1   9   2    4.86    0.08 
  -1   9   2    6.33    0.37 
  -1   9   2    5.50    0.41 
  -1   9   2    5.06    0.11 
   1   9  -2    5.32    0.20 
  -1   9   2    5.89    0.28 
   1   9  -2    5.03    0.14 
   1   9  -2    6.08    0.37 
   1  -9  -2    4.87    0.09 
  -1  -9   2    4.83    0.05 
  -1  -9   2    5.01    0.16 
   1  -9  -2    5.20    0.25 
   1  -9  -2    6.23    0.39 
  -1  -9   2    5.89    0.39 
   1  -9  -2    5.05    0.11 
  -1  -9   2    5.55    0.23 
  -1   9   1    1.59    0.07 
  -1   9   1    1.67    0.28 
  -1   9   1    2.11    0.27 
  -1   9   1    1.65    0.10 
   1   9  -1    1.74    0.32 
   1   9  -1    1.58    0.23 
   1   9  -1    1.67    0.12 
  -1   9   1    1.49    0.23 
   1   9  -1    1.66    0.04 
   1  -9  -1    1.60    0.07 
  -1  -9   1    1.92    0.16 
  -1  -9   1    1.60    0.35 
  -1  -9   1    1.68    0.05 
  -1  -9   1    1.65    0.11 
   1  -9  -1    1.66    0.21 
   1  -9  -1    1.69    0.14 
  -1   9   0    0.04    0.06 
  -1   9   0    0.01    0.12 
  -1   9   0    0.14    0.22 
   1   9   0   -0.05    0.23 
   1   9   0   -0.12    0.32 
  -1   9   0   -0.01    0.34 
   1   9   0    0.13    0.12 
   1   9   0   -0.01    0.05 
   1   9   0    0.22    0.34 
  -1   9   0   -0.13    0.35 
  -1  -9   0    0.10    0.06 
   1  -9   0   -0.26    0.35 
  -1  -9   0    0.19    0.33 
   1  -9   0   -0.04    0.20 
   1  -9   0    0.16    0.14 
  -1  -9   0    0.05    0.16 
   1  -9   0    0.02    0.07 
  -1   9  -1   71.96    0.67 
   1   9   1   72.04    0.70 
  -1   9  -1   71.56    0.68 
   1   9   1   72.23    0.77 
   1   9   1   71.36    0.68 
   1   9   1   71.99    0.72 
  -1   9  -1   71.64    0.75 
   1   9   1   71.45    0.65 
   1  -9   1   71.01    0.71 
   1  -9   1   72.23    0.62 
   1  -9   1   73.51    0.69 
  -1  -9  -1   72.15    0.71 
  -1  -9  -1   71.62    0.74 
  -1  -9  -1   72.68    0.74 
   1  -9   1   71.78    0.77 
   1   9   2    0.12    0.09 
   1   9   2    0.41    0.38 
  -1   9  -2    0.47    0.22 
  -1   9  -2    0.10    0.27 
   1   9   2    0.04    0.08 
  -1   9  -2    0.06    0.10 
   1   9   2    0.17    0.26 
  -1  -9  -2    0.06    0.09 
  -1  -9  -2   -0.19    0.23 
   1  -9   2    0.44    0.16 
   1  -9   2    0.07    0.06 
   1  -9   2   -0.30    0.29 
   1  -9   2    0.27    0.18 
  -1  -9  -2    0.52    0.37 
  -1   9  -3   94.38    0.99 
   1   9   3   94.25    1.06 
   1   9   3   96.08    1.05 
  -1   9  -3   96.39    1.04 
  -1   9  -3   93.31    0.85 
   1   9   3   95.09    0.99 
   1   9   3   94.88    0.97 
  -1  -9  -3   94.67    1.00 
   1  -9   3   94.27    0.83 
  -1  -9  -3   94.29    1.14 
   1  -9   3   94.60    0.97 
  -1  -9  -3   93.10    0.96 
   1  -9   3   95.18    1.04 
   1   9   4   24.83    0.57 
   1   9   4   22.02    0.43 
  -1   9  -4   24.90    0.59 
  -1   9  -4   24.97    0.56 
   1   9   4   24.64    0.68 
   1  -9   4   23.38    0.45 
  -1  -9  -4   25.05    0.60 
   1  -9   4   23.75    0.56 
  -1  -9  -4   22.44    0.42 
   1   9   5   46.35    0.84 
  -1   9  -5   46.00    0.66 
  -1   9  -5   45.38    0.68 
  -1   9  -5   45.95    0.78 
   1   9   5   46.23    0.76 
  -1  -9  -5   45.26    0.70 
  -1  -9  -5   42.93    0.50 
   1  -9   5   45.04    0.73 
   1   9   6    4.78    0.39 
  -1   9  -6    4.78    0.25 
  -1   9  -6    4.07    0.16 
   1   9   6    3.93    0.11 
  -1   9  -6    5.32    0.56 
   1   9   6    5.18    0.47 
  -1  -9  -6    5.14    0.43 
   1  -9   6    5.68    0.60 
   1  -9   6    4.05    0.19 
  -1  -9  -6    4.24    0.20 
  -1  -9  -6    4.33    0.36 
  -1   9  -7    0.20    0.27 
   1   9   7   -0.09    0.56 
  -1   9  -7    0.06    0.14 
  -1   9  -7   -0.46    0.52 
   1   9   7    0.07    0.14 
   1  -9   7    0.29    0.11 
   1  -9   7    0.08    0.18 
  -1  -9  -7    0.02    0.39 
   1  -9   7   -0.38    0.57 
  -1  -9  -7   -0.01    0.36 
  -1  -9  -7    0.05    0.20 
  -1   9  -8    2.66    0.71 
  -1   9  -8    2.86    0.29 
  -1   9  -8    2.78    0.17 
   1   9   8    2.74    0.50 
   1  -9   8    2.67    0.13 
  -1  -9  -8    2.62    0.36 
   1  -9   8    2.45    0.21 
  -1  -9  -8    2.84    0.23 
   1  -9   8    2.67    0.64 
   1   9   9    3.21    0.57 
  -1   9  -9    3.05    0.35 
  -1   9  -9    2.73    0.16 
   1  -9   9    2.67    0.16 
   1  -9   9    2.27    0.23 
   1  -9   9    3.27    0.75 
  -1  -9  -9    2.06    0.26 
   1   9  10   -0.02    0.76 
  -1   9 -10   -0.31    0.34 
  -1   9 -10    0.07    0.18 
   1  -9  10    0.85    0.79 
   1  -9  10   -0.10    0.21 
  -1  -9 -10    0.11    0.28 
   1  -9  10    0.12    0.16 
   1   9  11    0.62    0.65 
  -1   9 -11   -0.23    0.38 
  -1   9 -11    0.34    0.19 
  -1  -9 -11    0.06    0.32 
   1  -9  11   -0.11    0.25 
   1  -9  11   -0.15    0.82 
  -1   9 -12    9.71    0.45 
   1   9  12   10.84    0.99 
  -1  -9 -12    9.66    0.39 
   1  -9  12   10.30    0.93 
   1  -9  12    8.59    0.27 
   1   9  13    8.98    0.19 
   1   9  13    9.58    1.03 
  -1   9 -13    9.30    0.48 
  -1  -9 -13    8.60    0.40 
   1  -9  13    9.24    0.98 
   1  -9  13    8.16    0.27 
  -1   9 -14    0.65    0.48 
   1   9  14    1.48    1.07 
   1  -9  14    2.89    1.06 
   1  -9  14   -0.42    0.27 
  -1  -9 -14    0.35    0.41 
   1   9  15    3.64    1.16 
   1  -9  15    3.00    0.86 
  -1  -9 -15    2.52    0.33 
   1   9  16    1.53    1.26 
   1  -9  16   -0.04    1.12 
   1  10 -16    1.48    0.84 
  -1  10  16    1.74    1.19 
   1 -10 -16    0.08    0.46 
  -1 -10  16    0.69    1.06 
  -1  10  15    1.23    1.11 
   1  10 -15    0.72    0.52 
  -1 -10  15    1.00    1.05 
   1 -10 -15    0.13    0.42 
  -1  10  14    3.08    1.06 
   1  10 -14    2.39    0.56 
  -1 -10  14    1.61    0.97 
  -1 -10  14    1.21    0.28 
   1 -10 -14    0.79    0.40 
  -1  10  13    2.27    0.76 
   1  10 -13    1.72    0.51 
  -1 -10  13    0.88    0.25 
   1 -10 -13    0.50    0.36 
  -1 -10  13    1.01    0.69 
  -1  10  12    4.22    0.90 
   1  10 -12    3.38    0.43 
   1  10 -12    3.78    0.18 
  -1 -10  12    3.34    0.86 
   1 -10 -12    4.35    0.29 
  -1 -10  12    3.19    0.26 
  -1 -10  12    3.52    0.18 
  -1  10  11    3.91    0.18 
   1  10 -11    3.78    0.18 
   1  10 -11    3.73    0.45 
  -1  10  11    3.70    0.83 
   1 -10 -11    3.12    0.31 
  -1 -10  11    3.56    0.16 
  -1 -10  11    3.47    0.23 
  -1 -10  11    3.27    0.78 
   1  10 -10   26.83    0.50 
  -1  10  10   26.27    0.23 
  -1  10  10   28.96    0.91 
   1  10 -10   25.81    0.23 
  -1 -10  10   25.74    0.29 
  -1 -10  10   25.52    0.20 
  -1 -10  10   29.06    0.88 
   1  10  -9    2.39    0.65 
  -1  10   9    2.05    0.15 
   1  10  -9    2.23    0.38 
  -1  10   9    1.33    0.69 
   1  10  -9    1.54    0.16 
  -1 -10   9    1.84    0.20 
  -1 -10   9    2.12    0.13 
  -1 -10   9    2.08    0.67 
   1 -10  -9    1.84    0.20 
  -1  10   8    6.35    0.67 
  -1  10   8    5.77    0.17 
   1  10  -8    5.38    0.16 
   1  10  -8    6.86    0.63 
   1  10  -8    5.84    0.34 
  -1 -10   8    5.22    0.20 
   1 -10  -8    7.53    0.63 
  -1 -10   8    6.92    0.67 
  -1 -10   8    5.45    0.12 
   1 -10  -8    5.09    0.15 
  -1  10   7    4.93    0.21 
  -1  10   7    7.37    0.65 
   1  10  -7    5.24    0.16 
  -1  10   7    5.38    0.17 
   1  10  -7    6.73    0.48 
   1  10  -7    5.99    0.33 
  -1 -10   7    5.16    0.21 
   1 -10  -7    6.85    0.58 
   1 -10  -7    4.94    0.18 
  -1 -10   7    5.13    0.11 
   1 -10  -7    5.48    0.42 
  -1 -10   7    6.19    0.61 
  -1  10   6    7.33    0.13 
  -1  10   6    7.60    0.17 
  -1  10   6    8.82    0.58 
   1  10  -6    9.02    0.54 
   1  10  -6    8.14    0.32 
   1  10  -6    7.65    0.16 
  -1 -10   6    7.06    0.20 
   1 -10  -6    7.40    0.17 
  -1 -10   6    7.50    0.10 
   1 -10  -6    7.79    0.38 
  -1 -10   6    8.93    0.46 
   1 -10  -6    8.98    0.54 
  -1  10   5    4.23    0.40 
   1  10  -5    4.35    0.30 
  -1  10   5    3.93    0.11 
  -1  10   5    4.05    0.15 
   1  10  -5    3.91    0.14 
  -1  10   5    3.78    0.35 
   1  10  -5    4.23    0.37 
   1 -10  -5    4.38    0.35 
  -1 -10   5    4.26    0.24 
  -1 -10   5    4.27    0.20 
  -1 -10   5    4.40    0.50 
   1 -10  -5    5.47    0.49 
   1 -10  -5    4.02    0.14 
  -1  10   4   12.03    0.10 
  -1  10   4   12.09    0.15 
  -1  10   4   12.64    0.36 
   1  10  -4   13.57    0.47 
   1  10  -4   12.65    0.29 
  -1  10   4   12.98    0.40 
   1 -10  -4   12.69    0.26 
  -1 -10   4   12.38    0.20 
  -1 -10   4   13.18    0.49 
  -1 -10   4   12.19    0.23 
   1 -10  -4   13.08    0.47 
   1  10  -3    2.70    0.14 
  -1  10   3    2.47    0.08 
   1  10  -3    3.05    0.41 
  -1  10   3    2.49    0.44 
  -1  10   3    2.38    0.13 
  -1  10   3    2.89    0.31 
   1  10  -3    2.87    0.27 
   1 -10  -3    2.40    0.41 
  -1 -10   3    3.05    0.23 
  -1 -10   3    2.59    0.42 
   1 -10  -3    2.46    0.21 
  -1 -10   3    2.59    0.04 
   1 -10  -3    2.55    0.10 
   1  10  -2   87.44    0.90 
  -1  10   2   86.31    0.94 
  -1  10   2   86.42    0.92 
   1  10  -2   85.73    0.81 
  -1  10   2   86.69    0.98 
  -1  10   2   85.60    0.79 
   1  10  -2   86.62    0.89 
  -1  10   2   87.14    0.82 
  -1 -10   2   86.25    0.85 
   1 -10  -2   86.17    0.94 
   1 -10  -2   87.04    0.83 
   1 -10  -2   86.51    0.92 
  -1 -10   2   86.10    1.01 
   1 -10  -2   86.09    0.88 
  -1 -10   2   86.46    0.63 
  -1 -10   2   86.07    0.91 
   1  10  -1   30.16    0.33 
   1  10  -1   31.00    0.34 
   1  10  -1   31.97    0.50 
  -1  10   1   28.88    0.20 
  -1  10   1   32.17    0.44 
   1  10  -1   28.75    0.19 
  -1  10   1   30.08    0.30 
  -1  10   1   31.47    0.46 
   1 -10  -1   30.05    0.31 
  -1 -10   1   28.84    0.21 
  -1 -10   1   31.19    0.50 
  -1 -10   1   30.29    0.32 
   1  10   0   23.82    0.37 
   1  10   0   23.62    0.44 
  -1  10   0   24.27    0.48 
  -1  10   0   22.67    0.27 
  -1  10   0   23.93    0.43 
   1  10   0   22.46    0.32 
   1  10   0   24.11    0.49 
   1 -10   0   23.42    0.48 
  -1 -10   0   23.33    0.46 
  -1 -10   0   22.80    0.31 
   1 -10   0   22.83    0.29 
   1  10   1   14.41    0.32 
  -1  10  -1   15.44    0.44 
  -1  10  -1   13.77    0.16 
   1  10   1   15.05    0.45 
   1  10   1   13.82    0.17 
  -1  10  -1   14.69    0.28 
   1  10   1   15.03    0.41 
   1  10   1   13.39    0.07 
   1 -10   1   15.16    0.38 
   1 -10   1   13.43    0.08 
   1 -10   1   14.40    0.25 
  -1 -10  -1   14.30    0.23 
  -1 -10  -1   13.53    0.10 
   1 -10   1   13.59    0.17 
   1  10   2   13.64    0.09 
   1  10   2   14.20    0.17 
   1  10   2   16.23    0.46 
  -1  10  -2   14.28    0.18 
  -1  10  -2   14.90    0.28 
   1  10   2   15.14    0.34 
   1  10   2   16.49    0.50 
  -1 -10  -2   13.92    0.13 
   1 -10   2   13.67    0.07 
   1 -10   2   14.15    0.17 
  -1 -10  -2   14.61    0.30 
   1 -10   2   15.95    0.42 
   1 -10   2   15.25    0.26 
  -1  10  -3    1.04    0.33 
   1  10   3    0.60    0.15 
  -1  10  -3    1.09    0.16 
   1  10   3    0.71    0.09 
  -1  10  -3    1.16    0.25 
   1  10   3    0.92    0.24 
   1  10   3    1.02    0.35 
  -1 -10  -3    0.69    0.21 
   1 -10   3    1.18    0.45 
  -1 -10  -3    1.17    0.14 
   1 -10   3    0.99    0.15 
   1 -10   3    0.71    0.19 
  -1 -10  -3    1.06    0.41 
  -1  10  -4   12.72    0.27 
   1  10   4   11.75    0.16 
  -1  10  -4   12.60    0.18 
  -1  10  -4   13.74    0.54 
   1  10   4   14.42    0.57 
   1  10   4   13.17    0.39 
   1 -10   4   12.38    0.21 
  -1 -10  -4   13.94    0.44 
  -1 -10  -4   12.99    0.34 
  -1 -10  -4   11.92    0.16 
   1 -10   4   13.77    0.56 
   1 -10   4   12.67    0.23 
   1  10   5    3.30    0.37 
  -1  10  -5    3.20    0.24 
   1  10   5    2.90    0.40 
  -1  10  -5    3.00    0.50 
  -1  10  -5    2.80    0.16 
   1  10   5    2.90    0.13 
  -1 -10  -5    2.95    0.16 
   1 -10   5    3.31    0.42 
  -1 -10  -5    2.51    0.46 
   1 -10   5    3.02    0.22 
   1 -10   5    3.09    0.20 
  -1 -10  -5    3.40    0.36 
  -1  10  -6   17.25    0.29 
   1  10   6   16.57    0.15 
   1  10   6   17.42    0.41 
   1  10   6   18.53    0.62 
  -1  10  -6   17.71    0.65 
  -1  10  -6   16.84    0.17 
   1 -10   6   16.50    0.21 
  -1 -10  -6   17.05    0.38 
  -1 -10  -6   17.69    0.55 
  -1 -10  -6   16.79    0.21 
   1 -10   6   18.00    0.50 
  -1  10  -7    8.05    0.16 
  -1  10  -7    9.14    0.59 
  -1  10  -7    8.51    0.29 
   1  10   7    7.90    0.45 
  -1 -10  -7    7.79    0.21 
   1 -10   7    7.93    0.20 
   1 -10   7    8.22    0.48 
  -1 -10  -7    8.26    0.37 
  -1  10  -8   55.92    0.84 
   1  10   8   54.27    0.96 
  -1  10  -8   55.16    0.79 
   1 -10   8   55.71    0.91 
   1 -10   8   54.99    0.99 
  -1  10  -9    0.04    0.33 
   1  10   9    0.46    0.75 
  -1  10  -9   -0.09    0.16 
   1 -10   9    0.70    0.57 
   1 -10   9    0.38    0.15 
   1 -10   9    0.27    0.25 
  -1 -10  -9    0.09    0.26 
  -1  10 -10   12.85    0.25 
  -1  10 -10   14.11    0.42 
   1  10  10   15.63    0.90 
   1 -10  10   13.14    0.28 
   1 -10  10   12.73    0.17 
   1 -10  10   14.82    0.73 
  -1 -10 -10   12.12    0.31 
  -1  10 -11   16.06    0.47 
   1  10  11   17.82    0.96 
   1 -10  11   14.54    0.28 
  -1 -10 -11   14.63    0.37 
   1 -10  11   17.56    0.97 
   1  10  12   -0.30    0.69 
  -1  10 -12    0.33    0.43 
   1 -10  12    0.11    0.25 
  -1 -10 -12    0.05    0.37 
   1 -10  12    0.59    0.91 
   1  10  13   11.17    1.06 
  -1  10 -13   10.19    0.50 
   1 -10  13    9.95    1.00 
  -1 -10 -13    8.90    0.40 
   1 -10  13    8.75    0.28 
  -1  10 -14    0.05    0.49 
   1  10  14   -0.86    1.03 
  -1 -10 -14   -0.21    0.32 
   1 -10  14   -0.65    0.28 
   1 -10  14   -0.05    1.03 
   1  10  15    0.85    1.14 
   1 -10  15    0.32    1.10 
  -1 -10 -15   -0.03    0.45 
   1  10  16    4.37    1.29 
   1 -10  16    1.36    1.15 
  -1  11  16    1.19    1.19 
  -1 -11  16    0.52    1.15 
  -1  11  15    0.86    0.88 
   1  11 -15    0.01    0.57 
  -1 -11  15    0.09    1.06 
   1 -11 -15   -0.97    0.44 
  -1  11  14    5.83    1.03 
   1  11 -14    5.09    0.51 
  -1 -11  14    5.20    1.03 
   1 -11 -14    3.63    0.31 
  -1 -11  14    4.65    0.32 
  -1  11  13    1.42    0.98 
   1  11 -13    0.84    0.51 
  -1 -11  13    0.38    0.27 
  -1 -11  13    0.64    0.93 
   1 -11 -13    0.48    0.40 
  -1  11  12   -0.14    0.92 
   1  11 -12    0.07    0.48 
  -1 -11  12   -0.51    0.86 
   1 -11 -12    0.26    0.37 
  -1 -11  12    0.05    0.27 
  -1 -11  12    0.10    0.17 
   1  11 -11    0.97    0.17 
  -1  11  11    1.36    0.85 
  -1  11  11    1.29    0.19 
   1  11 -11    1.51    0.42 
   1 -11 -11    0.97    0.32 
  -1 -11  11    1.11    0.16 
  -1 -11  11    0.74    0.26 
  -1 -11  11    0.91    0.62 
   1  11 -10   22.95    0.50 
  -1  11  10   20.95    0.24 
   1  11 -10   21.05    0.23 
   1 -11 -10   20.47    0.33 
  -1 -11  10   20.67    0.29 
  -1 -11  10   25.55    0.95 
  -1 -11  10   20.37    0.20 
   1  11  -9   20.12    0.47 
  -1  11   9   19.34    0.23 
   1  11  -9   18.96    0.21 
  -1 -11   9   21.57    0.79 
   1 -11  -9   18.52    0.24 
  -1 -11   9   18.99    0.28 
  -1 -11   9   18.55    0.17 
   1  11  -8    2.22    0.34 
   1  11  -8    1.96    0.16 
  -1  11   8    2.66    0.65 
   1  11  -8    2.00    0.47 
  -1  11   8    2.16    0.15 
  -1 -11   8    2.47    0.66 
   1 -11  -8    1.74    0.19 
  -1 -11   8    1.72    0.24 
  -1 -11   8    2.17    0.11 
  -1  11   7    4.19    0.63 
   1  11  -7    4.36    0.59 
  -1  11   7    3.52    0.15 
   1  11  -7    3.66    0.33 
   1  11  -7    3.31    0.16 
  -1 -11   7    3.49    0.59 
  -1 -11   7    3.40    0.11 
   1 -11  -7    4.58    0.58 
  -1 -11   7    3.50    0.21 
   1 -11  -7    3.26    0.18 
  -1  11   6    2.05    0.15 
  -1  11   6    2.97    0.59 
   1  11  -6    2.62    0.31 
   1  11  -6    3.17    0.53 
  -1  11   6    2.15    0.12 
   1  11  -6    1.86    0.15 
  -1 -11   6    2.38    0.09 
   1 -11  -6    2.90    0.42 
   1 -11  -6    2.19    0.15 
  -1 -11   6    2.23    0.21 
  -1 -11   6    3.19    0.58 
   1 -11  -6    2.49    0.38 
   1  11  -5    3.31    0.49 
  -1  11   5    2.86    0.37 
  -1  11   5    2.67    0.11 
  -1  11   5    3.11    0.53 
   1  11  -5    3.32    0.17 
  -1  11   5    2.87    0.15 
   1  11  -5    2.96    0.29 
  -1 -11   5    2.98    0.23 
  -1 -11   5    2.77    0.19 
   1 -11  -5    2.73    0.14 
  -1 -11   5    3.13    0.51 
   1 -11  -5    3.06    0.47 
   1 -11  -5    2.62    0.34 
  -1  11   4   23.60    0.13 
   1  11  -4   23.86    0.20 
   1  11  -4   24.89    0.35 
  -1  11   4   24.13    0.20 
  -1  11   4   25.33    0.42 
   1  11  -4   26.20    0.56 
  -1  11   4   26.46    0.61 
  -1 -11   4   26.01    0.57 
   1 -11  -4   25.05    0.33 
   1 -11  -4   23.50    0.13 
  -1 -11   4   24.06    0.25 
  -1 -11   4   24.95    0.31 
   1 -11  -4   26.88    0.49 
  -1  11   3   14.03    0.56 
  -1  11   3   13.95    0.50 
  -1  11   3   13.59    0.33 
   1  11  -3   13.41    0.33 
   1  11  -3   14.66    0.50 
   1 -11  -3   13.39    0.35 
  -1 -11   3   13.25    0.29 
  -1 -11   3   13.86    0.53 
   1 -11  -3   14.22    0.53 
  -1  11   2    6.70    0.49 
  -1  11   2    6.63    0.27 
   1  11  -2    7.06    0.45 
  -1  11   2    6.08    0.17 
   1  11  -2    6.42    0.24 
  -1  11   2    7.07    0.43 
   1 -11  -2    6.90    0.30 
   1 -11  -2    6.07    0.17 
   1 -11  -2    7.76    0.47 
  -1 -11   2    6.75    0.18 
  -1 -11   2    6.72    0.27 
  -1 -11   2    7.45    0.48 
  -1  11   1    0.18    0.29 
   1  11  -1    0.04    0.05 
   1  11  -1    0.14    0.12 
   1  11  -1    0.31    0.29 
  -1  11   1    0.27    0.31 
   1  11  -1    0.67    0.41 
  -1  11   1    0.39    0.34 
  -1  11   1    0.33    0.16 
  -1  11   1    0.01    0.08 
  -1 -11   1    0.77    0.43 
  -1 -11   1    0.33    0.18 
  -1 -11   1    0.21    0.25 
   1 -11  -1   -0.27    0.25 
   1 -11  -1    0.15    0.09 
  -1 -11   1    0.18    0.07 
   1 -11  -1    0.03    0.17 
  -1  11   0    1.52    0.07 
   1  11   0    1.83    0.29 
   1  11   0    1.59    0.06 
  -1  11   0    1.66    0.16 
  -1  11   0    2.67    0.37 
   1  11   0    2.34    0.44 
  -1  11   0    2.35    0.41 
   1  11   0    2.10    0.31 
   1  11   0    1.57    0.12 
  -1  11   0    1.96    0.29 
  -1 -11   0    2.00    0.27 
   1 -11   0    1.96    0.44 
   1 -11   0    1.51    0.08 
   1 -11   0    1.74    0.25 
  -1 -11   0    1.60    0.09 
  -1 -11   0    2.53    0.43 
   1 -11   0    1.67    0.14 
   1  11   1    0.39    0.07 
  -1  11  -1    0.54    0.41 
   1  11   1    0.39    0.30 
  -1  11  -1    0.50    0.16 
  -1  11  -1    1.35    0.28 
   1  11   1    0.38    0.33 
   1  11   1    0.46    0.12 
   1  11   1    0.80    0.31 
   1 -11   1    0.46    0.23 
  -1 -11  -1    0.58    0.21 
   1 -11   1    0.42    0.07 
  -1 -11  -1    0.56    0.11 
   1 -11   1    0.54    0.14 
   1 -11   1    0.92    0.45 
  -1  11  -2    3.02    0.42 
   1  11   2    3.10    0.35 
   1  11   2    3.17    0.08 
   1  11   2    3.03    0.32 
   1  11   2    3.12    0.17 
  -1  11  -2    3.47    0.17 
   1  11   2    3.33    0.41 
  -1  11  -2    4.95    0.33 
  -1 -11  -2    3.44    0.43 
   1 -11   2    3.59    0.46 
   1 -11   2    3.07    0.19 
  -1 -11  -2    4.34    0.31 
   1 -11   2    3.16    0.23 
   1 -11   2    3.22    0.07 
  -1 -11  -2    3.58    0.12 
   1  11   3   16.82    0.20 
   1  11   3   20.11    0.60 
   1  11   3   19.20    0.43 
  -1  11  -3   16.89    0.18 
  -1  11  -3   18.47    0.32 
  -1 -11  -3   21.09    0.59 
   1 -11   3   20.12    0.52 
   1 -11   3   19.95    0.45 
   1 -11   3   17.12    0.25 
  -1 -11  -3   18.39    0.38 
   1 -11   3   18.45    0.30 
  -1  11  -4   49.30    0.83 
   1  11   4   49.29    0.90 
  -1  11  -4   48.93    0.81 
   1  11   4   49.28    0.79 
  -1  11  -4   49.36    0.78 
   1  11   4   48.14    0.77 
   1  11   4   49.24    0.73 
   1 -11   4   49.24    0.86 
  -1 -11  -4   49.88    1.05 
  -1 -11  -4   49.63    0.86 
   1 -11   4   49.78    0.80 
  -1 -11  -4   49.90    0.81 
   1 -11   4   49.77    0.69 
  -1  11  -5    1.13    0.28 
   1  11   5    1.34    0.54 
  -1  11  -5    1.33    0.40 
   1  11   5    0.85    0.15 
   1  11   5    0.69    0.12 
   1  11   5    1.35    0.37 
  -1  11  -5    0.74    0.17 
  -1 -11  -5    0.80    0.48 
   1 -11   5    0.75    0.23 
  -1 -11  -5    1.10    0.27 
   1 -11   5    0.79    0.21 
   1 -11   5    0.42    0.54 
  -1 -11  -5    0.65    0.16 
  -1  11  -6   20.44    0.69 
  -1  11  -6   16.35    0.22 
   1  11   6   18.11    0.47 
  -1  11  -6   17.88    0.34 
   1  11   6   20.32    0.72 
  -1 -11  -6   18.02    0.39 
  -1 -11  -6   20.59    0.60 
   1 -11   6   20.17    0.73 
   1 -11   6   16.25    0.26 
  -1  11  -7    1.52    0.31 
  -1  11  -7    1.13    0.17 
   1  11   7    1.53    0.39 
  -1  11  -7    1.53    0.47 
   1  11   7    1.90    0.65 
  -1 -11  -7    1.09    0.16 
   1 -11   7    0.87    0.21 
   1 -11   7    1.24    0.63 
  -1  11  -8    0.46    0.33 
   1  11   8   -0.31    0.50 
  -1  11  -8    0.02    0.17 
   1 -11   8    0.14    0.22 
  -1 -11  -8   -0.08    0.24 
   1 -11   8    0.79    0.69 
   1 -11   8    0.21    0.12 
   1  11   9    3.43    0.57 
  -1  11  -9    3.32    0.35 
   1 -11   9    3.20    0.57 
   1 -11   9    3.25    0.24 
  -1 -11  -9    3.13    0.30 
   1  11  10    1.07    0.82 
  -1  11 -10    0.62    0.39 
   1 -11  10    0.82    0.62 
  -1 -11 -10    0.50    0.30 
   1 -11  10    0.72    0.16 
   1 -11  10    0.60    0.28 
   1  11  11   18.48    1.03 
  -1  11 -11   16.11    0.49 
   1 -11  11   14.87    0.31 
  -1 -11 -11   13.91    0.38 
   1 -11  11   16.84    0.98 
   1  11  12    0.54    0.92 
  -1  11 -12    0.22    0.45 
   1 -11  12    0.25    0.30 
   1 -11  12   -0.67    0.89 
  -1 -11 -12    0.02    0.37 
  -1  11 -13   12.21    0.51 
   1  11  13   12.64    0.85 
  -1 -11 -13   10.41    0.42 
   1 -11  13   13.03    1.06 
   1 -11  13   11.16    0.33 
  -1  11 -14    0.43    0.55 
   1  11  14    1.56    1.10 
   1 -11  14    1.14    1.05 
  -1 -11 -14   -0.32    0.42 
   1 -11  14   -0.05    0.31 
   1  11  15    0.39    1.14 
   1 -11  15    1.09    1.11 
  -1 -11 -15   -0.14    0.36 
  -1 -12  16    2.63    1.11 
   1  12 -15    1.28    0.62 
  -1  12  15    0.62    0.87 
  -1 -12  15    1.40    1.07 
   1 -12 -15    0.14    0.46 
  -1  12  14    1.03    1.05 
   1  12 -14    0.11    0.57 
  -1 -12  14   -0.20    0.40 
  -1 -12  14   -1.53    0.97 
   1 -12 -14   -0.80    0.42 
  -1  12  13    0.34    1.02 
   1  12 -13    0.16    0.53 
  -1 -12  13   -0.44    0.95 
  -1 -12  13    0.04    0.29 
   1 -12 -13   -0.02    0.31 
   1  12 -12   -0.40    0.45 
  -1  12  12   -0.42    0.92 
  -1 -12  12   -1.19    0.84 
  -1 -12  12    0.04    0.26 
   1 -12 -12   -0.06    0.37 
   1  12 -11    3.74    0.44 
  -1  12  11    3.51    0.21 
  -1  12  11    5.22    0.93 
  -1 -12  11    4.49    0.83 
   1 -12 -11    4.09    0.36 
  -1 -12  11    3.56    0.30 
  -1 -12  11    4.06    0.18 
  -1  12  10    2.20    0.84 
  -1  12  10    0.87    0.19 
   1  12 -10    0.39    0.42 
  -1 -12  10    0.46    0.28 
   1 -12 -10    0.63    0.29 
  -1 -12  10    0.62    0.15 
  -1 -12  10    0.77    0.62 
  -1  12   9    2.71    0.18 
  -1  12   9    3.86    0.78 
   1  12  -9    2.55    0.40 
  -1 -12   9    2.35    0.75 
  -1  12   8    5.09    0.75 
   1  12  -8    3.88    0.66 
  -1  12   8    3.08    0.19 
   1  12  -8    2.97    0.18 
   1  12  -8    3.28    0.37 
  -1 -12   8    3.32    0.25 
   1 -12  -8    2.86    0.21 
  -1 -12   8    3.20    0.12 
  -1 -12   8    3.52    0.54 
  -1  12   7    6.23    0.55 
   1  12  -7    5.40    0.47 
   1  12  -7    4.26    0.17 
   1  12  -7    5.36    0.36 
  -1  12   7    4.78    0.17 
  -1 -12   7    5.16    0.62 
  -1 -12   7    4.69    0.11 
   1 -12  -7    6.49    0.71 
   1 -12  -7    4.47    0.18 
  -1 -12   7    4.52    0.23 
   1  12  -6   12.06    0.35 
  -1  12   6   11.15    0.17 
  -1  12   6   13.12    0.53 
   1  12  -6   11.02    0.18 
   1  12  -6   13.31    0.50 
  -1  12   6   11.90    0.44 
  -1 -12   6   13.24    0.64 
  -1 -12   6   11.15    0.24 
   1 -12  -6   12.85    0.58 
  -1  12   5   61.67    0.86 
   1  12  -5   62.77    0.91 
   1  12  -5   61.47    0.93 
  -1  12   5   61.14    1.01 
   1  12  -5   59.73    0.85 
  -1  12   5   61.12    1.04 
  -1  12   5   60.34    0.78 
   1 -12  -5   61.00    0.91 
  -1 -12   5   60.49    0.81 
  -1 -12   5   63.03    0.83 
  -1 -12   5   62.05    0.90 
   1 -12  -5   60.00    0.99 
   1 -12  -5   63.48    0.99 
   1  12  -4   41.16    0.45 
   1  12  -4   48.15    0.83 
  -1  12   4   44.16    0.74 
  -1  12   4   44.74    0.73 
  -1  12   4   43.77    0.72 
   1  12  -4   45.08    0.73 
   1 -12  -4   43.39    0.63 
  -1 -12   4   43.81    0.65 
  -1 -12   4   43.89    0.72 
  -1 -12   4   44.04    0.42 
   1 -12  -4   44.73    0.71 
   1 -12  -4   40.95    0.48 
   1  12  -3    6.03    0.33 
  -1  12   3    6.84    0.57 
  -1  12   3    5.16    0.18 
  -1  12   3    6.21    0.39 
   1  12  -3    5.31    0.18 
  -1  12   3    7.00    0.42 
   1  12  -3    6.77    0.50 
  -1  12   3    4.95    0.11 
   1 -12  -3    4.90    0.12 
  -1 -12   3    4.88    0.06 
   1 -12  -3    6.54    0.51 
  -1 -12   3    5.57    0.23 
   1 -12  -3    5.55    0.34 
  -1 -12   3    5.79    0.24 
  -1 -12   3    6.97    0.53 
  -1  12   2    6.77    0.39 
   1  12  -2    6.46    0.45 
  -1  12   2    6.55    0.17 
  -1  12   2    6.26    0.09 
  -1  12   2    6.62    0.43 
   1  12  -2    6.49    0.14 
   1  12  -2    6.46    0.31 
  -1  12   2    6.68    0.34 
  -1 -12   2    6.85    0.27 
  -1 -12   2    6.90    0.47 
   1 -12  -2    6.29    0.18 
   1 -12  -2    6.43    0.29 
   1 -12  -2    6.34    0.10 
  -1 -12   2    6.25    0.06 
  -1 -12   2    6.69    0.21 
  -1  12   1    0.43    0.48 
  -1  12   1    0.43    0.16 
  -1  12   1    0.43    0.31 
   1  12  -1    0.51    0.16 
  -1  12   1    0.51    0.33 
  -1  12   1    0.22    0.08 
   1  12  -1    0.38    0.06 
   1  12  -1    0.67    0.45 
   1  12  -1    0.93    0.31 
   1  12  -1    0.53    0.43 
  -1 -12   1    0.59    0.27 
  -1 -12   1    0.76    0.46 
  -1 -12   1    0.43    0.14 
   1 -12  -1    0.39    0.14 
   1 -12  -1    0.62    0.10 
  -1 -12   1    0.39    0.07 
   1 -12  -1    0.48    0.28 
   1  12   0   57.12    0.66 
   1  12   0   57.91    0.55 
  -1  12   0   58.50    0.83 
  -1  12   0   58.09    0.81 
  -1  12   0   59.47    0.85 
  -1  12   0   57.84    0.62 
   1  12   0   57.81    0.70 
   1  12   0   57.73    0.74 
   1  12   0   57.37    0.68 
  -1  12   0   58.42    0.76 
   1 -12   0   57.50    0.67 
  -1 -12   0   58.36    0.69 
  -1 -12   0   57.41    0.64 
   1 -12   0   57.89    0.74 
   1 -12   0   57.64    0.74 
   1 -12   0   57.76    0.68 
  -1  12  -1    4.92    0.32 
  -1  12  -1    5.58    0.49 
   1  12   1    5.21    0.41 
   1  12   1    5.74    0.46 
   1  12   1    4.09    0.17 
   1  12   1    4.70    0.34 
  -1  12  -1    4.27    0.18 
   1  12   1    4.00    0.08 
  -1 -12  -1    4.20    0.12 
   1 -12   1    4.05    0.08 
  -1 -12  -1    4.79    0.30 
   1 -12   1    4.51    0.27 
   1 -12   1    4.39    0.21 
   1 -12   1    5.04    0.50 
   1  12   2   22.37    0.64 
   1  12   2   22.23    0.54 
  -1  12  -2   18.70    0.23 
   1  12   2   22.80    0.52 
  -1  12  -2   22.83    0.54 
  -1  12  -2   20.46    0.37 
   1  12   2   19.71    0.42 
  -1 -12  -2   20.22    0.34 
   1 -12   2   22.33    0.48 
   1 -12   2   20.38    0.34 
   1 -12   2   21.22    0.61 
  -1 -12  -2   22.01    0.51 
   1  12   3    0.78    0.36 
  -1  12  -3    1.07    0.29 
  -1  12  -3    0.69    0.17 
   1  12   3    0.29    0.38 
   1  12   3    0.32    0.12 
   1  12   3    0.41    0.09 
  -1  12  -3    0.43    0.46 
  -1 -12  -3    0.71    0.46 
   1 -12   3    0.75    0.21 
   1 -12   3    1.01    0.40 
   1 -12   3    0.54    0.23 
  -1 -12  -3    0.43    0.31 
   1 -12   3    0.40    0.07 
  -1 -12  -3    0.70    0.14 
  -1  12  -4    1.32    0.49 
  -1  12  -4    0.91    0.17 
   1  12   4    1.56    0.38 
   1  12   4    1.12    0.11 
   1  12   4    1.17    0.41 
   1  12   4    1.24    0.16 
  -1  12  -4    1.32    0.25 
   1 -12   4    1.45    0.42 
  -1 -12  -4    1.61    0.32 
   1 -12   4    1.12    0.21 
  -1 -12  -4    1.35    0.15 
   1 -12   4    1.35    0.25 
  -1 -12  -4    1.49    0.48 
  -1  12  -5    0.10    0.17 
   1  12   5   -0.19    0.55 
   1  12   5    0.00    0.11 
  -1  12  -5    0.26    0.27 
   1  12   5    0.35    0.16 
  -1  12  -5    0.13    0.52 
   1  12   5    0.26    0.37 
   1 -12   5    0.10    0.22 
  -1 -12  -5    0.11    0.34 
   1 -12   5   -0.43    0.55 
   1 -12   5    0.28    0.24 
  -1 -12  -5    0.19    0.13 
  -1 -12  -5   -0.06    0.37 
   1  12   6    9.43    0.44 
   1  12   6    9.80    0.67 
  -1  12  -6    9.07    0.31 
  -1  12  -6   10.00    0.51 
   1 -12   6    9.77    0.66 
   1 -12   6    8.23    0.25 
   1  12   7   34.52    0.52 
   1  12   7   39.07    0.94 
  -1  12  -7   38.01    0.74 
  -1  12  -7   36.99    0.64 
   1  12   7   39.40    0.79 
   1 -12   7   36.98    0.91 
   1  12   8   45.78    0.30 
  -1 -12  -8   44.48    0.35 
   1 -12   8   44.98    0.35 
   1 -12   8   44.45    0.23 
  -1  12  -9    4.57    0.39 
   1  12   9    5.06    0.81 
   1 -12   9    4.38    0.15 
   1 -12   9    4.48    0.27 
  -1 -12  -9    4.10    0.29 
   1 -12   9    4.35    0.78 
  -1  12 -10   -0.27    0.38 
   1  12  10    0.72    0.86 
   1 -12  10   -0.31    0.63 
  -1 -12 -10    0.08    0.33 
   1 -12  10    0.19    0.17 
   1 -12  10   -0.02    0.27 
  -1  12 -11    2.93    0.42 
   1  12  11    3.95    0.92 
   1 -12  11    2.71    0.32 
   1 -12  11    1.82    0.86 
  -1 -12 -11    3.67    0.38 
   1  12  12    1.92    0.99 
  -1  12 -12    1.58    0.45 
   1 -12  12    1.17    0.27 
  -1 -12 -12    1.22    0.39 
   1 -12  12    0.55    0.92 
  -1  12 -13    1.89    0.47 
   1  12  13    3.86    1.03 
   1 -12  13    1.74    0.96 
   1 -12  13    1.30    0.30 
  -1 -12 -13    1.71    0.40 
   1  12  14    1.23    0.88 
   1 -12  14    0.52    1.05 
   1 -12  14   -0.09    0.32 
  -1 -12 -14    0.63    0.45 
   1  12  15    2.72    1.18 
  -1 -12 -15    1.44    0.57 
   1 -12  15    3.71    1.16 
   1  13 -15    0.19    0.60 
  -1  13  15    0.99    0.90 
  -1 -13  15    1.61    1.11 
   1 -13 -15   -0.10    0.35 
  -1  13  14   -0.93    1.02 
   1  13 -14    0.25    0.57 
   1 -13 -14   -0.24    0.43 
  -1 -13  14   -0.55    0.74 
   1  13 -13    4.48    0.53 
  -1  13  13    4.18    1.04 
  -1 -13  13    4.31    0.99 
  -1 -13  13    3.27    0.31 
   1 -13 -13    2.78    0.41 
   1  13 -12   21.51    0.63 
  -1  13  12   22.74    0.91 
  -1 -13  12   22.17    0.89 
  -1  13  11    3.12    0.95 
   1  13 -11    2.67    0.47 
  -1  13  11    2.61    0.23 
   1 -13 -11    2.68    0.37 
  -1 -13  11    2.36    0.19 
  -1 -13  11    2.12    0.31 
  -1 -13  11    1.33    0.87 
  -1  13  10    0.66    0.85 
  -1  13  10    0.52    0.21 
   1  13 -10    0.19    0.43 
  -1 -13  10   -0.23    0.30 
  -1 -13  10    0.42    0.62 
   1 -13 -10    0.11    0.30 
  -1 -13  10    0.29    0.14 
   1  13  -9    7.05    0.49 
  -1  13   9    7.34    0.84 
  -1  13   9    6.11    0.22 
  -1 -13   9    5.55    0.30 
   1 -13  -9    5.82    0.24 
  -1 -13   9    5.69    0.14 
  -1 -13   9    7.80    0.83 
  -1  13   8    3.63    0.20 
   1  13  -8    3.91    0.40 
  -1  13   8    5.29    0.79 
   1  13  -8    2.98    0.21 
  -1 -13   8    3.26    0.12 
   1 -13  -8    2.95    0.21 
  -1 -13   8    3.00    0.26 
  -1 -13   8    4.18    0.57 
  -1  13   7    0.40    0.67 
  -1  13   7   -0.03    0.18 
   1  13  -7    0.29    0.59 
   1  13  -7   -0.33    0.17 
   1  13  -7    0.10    0.36 
  -1 -13   7   -0.79    0.25 
   1 -13  -7   -0.07    0.14 
  -1 -13   7    0.16    0.10 
  -1 -13   7   -0.35    0.62 
   1  13  -6    5.64    0.34 
  -1  13   6    5.49    0.19 
  -1  13   6    5.35    0.42 
  -1  13   6    5.86    0.61 
   1  13  -6    6.46    0.58 
   1  13  -6    5.33    0.18 
  -1 -13   6    5.47    0.58 
   1 -13  -6    5.12    0.16 
  -1 -13   6    5.91    0.29 
   1 -13  -6    5.54    0.55 
  -1 -13   6    5.41    0.23 
  -1  13   5   20.66    0.47 
   1  13  -5   22.57    0.65 
   1  13  -5   20.89    0.39 
  -1  13   5   18.90    0.15 
  -1  13   5   23.08    0.72 
   1  13  -5   19.30    0.18 
  -1  13   5   19.46    0.21 
   1 -13  -5   19.06    0.19 
  -1 -13   5   19.50    0.23 
  -1 -13   5   20.96    0.35 
  -1  13   4   97.71    1.05 
   1  13  -4   99.21    1.09 
  -1  13   4   98.62    1.13 
   1  13  -4   95.97    1.06 
   1  13  -4   99.34    1.12 
  -1  13   4   99.89    1.26 
  -1  13   4   98.74    1.04 
  -1  13   4   99.22    1.10 
  -1 -13   4   98.50    1.15 
  -1 -13   4   99.08    1.01 
   1 -13  -4   98.65    1.18 
   1 -13  -4   96.31    1.16 
  -1 -13   4   97.34    1.26 
   1 -13  -4   98.44    1.14 
  -1 -13   4   98.17    0.72 
   1  13  -3    2.10    0.32 
  -1  13   3    2.23    0.29 
   1  13  -3    2.18    0.18 
  -1  13   3    1.99    0.17 
  -1  13   3    2.17    0.54 
   1  13  -3    2.16    0.47 
  -1  13   3    2.21    0.46 
  -1  13   3    1.98    0.09 
  -1 -13   3    2.64    0.52 
   1 -13  -3    2.09    0.12 
  -1 -13   3    2.27    0.28 
  -1 -13   3    2.00    0.06 
   1 -13  -3    2.18    0.47 
   1 -13  -3    1.95    0.24 
  -1 -13   3    1.97    0.20 
   1  13  -2   12.01    0.35 
  -1  13   2   12.60    0.46 
   1  13  -2   11.66    0.21 
  -1  13   2   11.69    0.39 
   1  13  -2   12.39    0.51 
  -1  13   2   11.28    0.21 
  -1  13   2   13.04    0.43 
  -1  13   2   10.85    0.10 
  -1 -13   2   10.89    0.08 
  -1 -13   2   13.63    0.57 
   1 -13  -2   12.21    0.36 
   1 -13  -2   11.20    0.21 
   1 -13  -2   10.93    0.12 
  -1 -13   2   11.35    0.19 
  -1 -13   2   11.97    0.31 
   1  13  -1    3.39    0.18 
   1  13  -1    2.88    0.06 
   1  13  -1    3.35    0.26 
  -1  13   1    3.09    0.18 
   1  13  -1    3.63    0.49 
   1  13  -1    2.82    0.34 
  -1  13   1    3.07    0.35 
  -1  13   1    2.85    0.09 
  -1  13   1    3.30    0.51 
  -1  13   1    3.73    0.28 
  -1 -13   1    3.91    0.50 
   1 -13  -1    3.08    0.19 
  -1 -13   1    3.01    0.29 
   1 -13  -1    2.93    0.11 
   1 -13  -1    2.94    0.23 
  -1 -13   1    3.13    0.21 
  -1 -13   1    3.12    0.09 
   1  13   0    0.94    0.32 
   1  13   0    1.01    0.07 
  -1  13   0    1.00    0.13 
   1  13   0    0.98    0.12 
  -1  13   0    0.71    0.49 
   1  13   0    1.39    0.49 
  -1  13   0    1.41    0.32 
  -1  13   0    1.02    0.34 
   1  13   0    1.35    0.45 
  -1  13   0    0.98    0.07 
   1 -13   0    1.30    0.47 
  -1 -13   0    1.13    0.09 
  -1 -13   0    0.74    0.29 
   1 -13   0    1.04    0.27 
   1 -13   0    1.05    0.09 
   1 -13   0    1.04    0.15 
   1  13   1   28.04    0.44 
   1  13   1   29.07    0.54 
   1  13   1   29.38    0.59 
  -1  13  -1   28.65    0.43 
   1  13   1   29.60    0.49 
  -1  13  -1   30.30    0.63 
  -1 -13  -1   28.13    0.40 
   1 -13   1   29.28    0.48 
   1 -13   1   30.20    0.64 
   1 -13   1   28.29    0.37 
  -1 -13  -1   32.88    0.81 
  -1  13  -2    2.73    0.32 
   1  13   2    1.90    0.09 
  -1  13  -2    1.78    0.18 
  -1  13  -2    2.26    0.48 
   1  13   2    1.88    0.45 
   1  13   2    2.37    0.36 
   1  13   2    1.82    0.51 
   1  13   2    1.80    0.17 
   1 -13   2    1.77    0.21 
  -1 -13  -2    1.83    0.23 
   1 -13   2    2.13    0.40 
  -1 -13  -2    1.45    0.44 
   1 -13   2    1.90    0.26 
   1 -13   2    1.75    0.07 
   1  13   3    1.06    0.37 
   1  13   3    0.81    0.45 
   1  13   3    0.94    0.17 
   1  13   3    0.91    0.09 
  -1  13  -3    0.89    0.14 
  -1  13  -3    1.04    0.29 
  -1  13  -3    1.46    0.50 
   1  13   3    1.03    0.54 
  -1 -13  -3    1.26    0.48 
  -1 -13  -3    0.67    0.31 
   1 -13   3    0.86    0.07 
   1 -13   3    0.75    0.21 
  -1 -13  -3    0.90    0.14 
   1 -13   3    1.28    0.25 
   1 -13   3    1.26    0.54 
   1  13   4   50.95    0.84 
   1  13   4   50.16    0.78 
  -1  13  -4   49.83    0.83 
  -1  13  -4   51.37    0.90 
   1  13   4   50.07    0.81 
  -1  13  -4   49.16    0.70 
   1  13   4   50.03    0.81 
  -1 -13  -4   48.00    0.70 
   1 -13   4   50.94    0.64 
  -1 -13  -4   49.79    0.84 
   1 -13   4   49.50    0.76 
   1 -13   4   51.06    0.74 
  -1  13  -5   32.73    0.40 
   1  13   5   33.27    0.54 
   1  13   5   31.10    0.27 
   1 -13   5   31.28    0.28 
  -1 -13  -5   30.18    0.23 
  -1  13  -6    0.35    0.30 
   1  13   6    0.18    0.64 
   1  13   6   -0.02    0.32 
   1  13   6    0.21    0.17 
   1 -13   6   -0.09    0.18 
  -1 -13  -6   -0.26    0.20 
   1 -13   6   -0.05    0.62 
   1 -13   6    0.02    0.24 
   1  13   7   20.29    0.57 
   1  13   7   21.51    0.73 
   1  13   7   17.79    0.24 
  -1  13  -7   20.26    0.46 
   1 -13   7   18.22    0.33 
   1 -13   7   21.98    0.86 
  -1 -13  -7   17.16    0.29 
   1  13   8   20.22    0.26 
  -1  13  -8   21.87    0.45 
   1  13   8   24.33    0.92 
   1 -13   8   23.52    0.90 
  -1 -13  -8   19.54    0.27 
   1 -13   8   20.17    0.32 
   1  13   9    1.26    0.84 
  -1  13  -9    0.25    0.41 
   1 -13   9   -0.05    0.30 
   1 -13   9    0.49    0.15 
   1 -13   9   -0.15    0.79 
  -1 -13  -9    0.59    0.31 
  -1  13 -10    1.49    0.42 
   1  13  10    2.21    0.90 
   1 -13  10    1.39    0.32 
   1 -13  10    1.77    0.18 
   1 -13  10    1.82    0.69 
  -1 -13 -10    1.24    0.25 
   1  13  11    0.92    0.74 
  -1  13 -11    0.57    0.45 
  -1 -13 -11    0.71    0.38 
   1 -13  11    0.49    0.73 
   1 -13  11    0.40    0.30 
   1  13  12    1.35    1.01 
  -1  13 -12    1.41    0.47 
   1 -13  12   -0.49    0.91 
   1 -13  12    0.97    0.33 
  -1 -13 -12    1.08    0.30 
   1  13  13    3.29    1.07 
  -1  13 -13    0.38    0.50 
   1 -13  13    0.65    0.29 
  -1 -13 -13    0.81    0.43 
   1 -13  13    0.94    1.00 
   1  13  14    2.91    0.84 
   1 -13  14    2.46    0.30 
   1 -13  14    3.59    1.12 
  -1 -13 -14    2.28    0.44 
   1  13  15    0.84    1.20 
   1 -13  15   -0.44    1.12 
  -1  14  15    0.29    0.90 
  -1 -14  15   -0.65    1.17 
   1  14 -14    0.01    0.55 
  -1  14  14   -0.89    1.06 
   1 -14 -14   -1.46    0.42 
  -1 -14  14    0.54    1.12 
   1  14 -13    5.66    0.58 
  -1  14  13    6.22    1.08 
   1 -14 -13    4.64    0.44 
  -1 -14  13    3.74    0.99 
  -1 -14  13    5.47    0.33 
  -1  14  12    3.64    0.77 
   1  14 -12    3.25    0.48 
  -1 -14  12    2.87    0.95 
  -1 -14  12    3.34    0.29 
   1 -14 -12    2.91    0.38 
  -1  14  11    1.11    0.24 
  -1  14  11    0.69    0.94 
   1  14 -11    1.65    0.53 
   1 -14 -11    0.83    0.27 
  -1 -14  11    1.18    0.30 
  -1 -14  11    0.76    0.90 
  -1  14  10    0.29    0.23 
  -1  14  10    0.57    0.89 
   1  14 -10    0.58    0.51 
   1 -14 -10    0.21    0.24 
  -1 -14  10   -0.53    0.31 
  -1 -14  10    0.34    0.15 
  -1 -14  10   -0.18    0.84 
  -1  14   9    0.75    0.21 
  -1  14   9    1.33    0.84 
   1  14  -9    0.57    0.42 
   1 -14  -9    0.75    0.24 
  -1 -14   9    0.48    0.79 
  -1 -14   9    0.44    0.27 
  -1 -14   9    0.93    0.12 
  -1  14   8   10.38    0.22 
   1  14  -8   11.37    0.46 
  -1  14   8   13.48    0.88 
  -1 -14   8    9.97    0.13 
  -1 -14   8   12.27    0.79 
  -1 -14   8   10.10    0.30 
  -1  14   7    4.93    0.73 
   1  14  -7    4.02    0.38 
  -1  14   7    3.85    0.18 
  -1 -14   7    3.89    0.25 
  -1 -14   7    3.57    0.66 
   1 -14  -7    4.04    0.15 
  -1 -14   7    4.13    0.10 
  -1  14   6    3.41    0.33 
  -1  14   6    3.93    0.51 
   1  14  -6    3.93    0.59 
   1  14  -6    3.71    0.36 
  -1  14   6    3.33    0.17 
  -1 -14   6    3.60    0.61 
  -1 -14   6    3.51    0.24 
  -1 -14   6    3.64    0.28 
   1 -14  -6    3.50    0.17 
  -1 -14   6    3.46    0.06 
  -1  14   5    0.70    0.32 
  -1  14   5    0.20    0.11 
   1  14  -5    0.53    0.38 
  -1  14   5    0.51    0.18 
   1  14  -5    0.11    0.54 
   1  14  -5    0.01    0.17 
  -1  14   5    0.65    0.48 
   1 -14  -5    0.33    0.15 
  -1 -14   5    0.61    0.58 
  -1 -14   5    0.43    0.06 
   1 -14  -5    0.06    0.40 
  -1 -14   5    0.43    0.28 
  -1 -14   5    0.66    0.19 
   1  14  -4    0.27    0.18 
   1  14  -4    1.68    0.54 
  -1  14   4    0.28    0.18 
   1  14  -4    0.72    0.34 
  -1  14   4    1.63    0.52 
  -1  14   4    0.35    0.11 
  -1  14   4    0.97    0.61 
  -1  14   4    1.09    0.33 
  -1 -14   4    0.62    0.29 
  -1 -14   4    1.25    0.58 
  -1 -14   4    0.21    0.24 
   1 -14  -4    0.22    0.14 
   1 -14  -4    1.80    0.57 
   1  14  -3   22.35    0.22 
   1  14  -3   23.42    0.39 
  -1  14   3   25.47    0.69 
  -1  14   3   24.31    0.47 
  -1  14   3   25.63    0.53 
   1  14  -3   25.83    0.64 
  -1 -14   3   25.53    0.66 
   1 -14  -3   25.49    0.64 
  -1 -14   3   22.31    0.22 
  -1 -14   3   23.81    0.33 
   1 -14  -3   23.59    0.41 
  -1  14   2   14.81    0.21 
   1  14  -2   17.02    0.44 
  -1  14   2   16.05    0.46 
   1  14  -2   14.63    0.20 
  -1 -14   2   18.05    0.65 
  -1 -14   2   15.09    0.28 
   1 -14  -2   16.43    0.42 
   1 -14  -2   14.96    0.25 
  -1 -14   2   16.46    0.38 
   1 -14  -2   14.28    0.17 
  -1  14   1   30.11    0.14 
  -1  14   1   30.94    0.23 
   1  14  -1   32.44    0.39 
   1  14  -1   30.88    0.25 
  -1  14   1   32.42    0.39 
  -1 -14   1   33.76    0.65 
   1 -14  -1   30.19    0.16 
   1 -14  -1   30.78    0.27 
   1 -14  -1   32.34    0.37 
  -1 -14   1   30.02    0.13 
  -1 -14   1   30.52    0.23 
  -1  14   0   18.56    0.48 
  -1  14   0   16.41    0.10 
   1  14   0   16.65    0.16 
   1  14   0   18.79    0.54 
   1  14   0   16.41    0.09 
   1  14   0   17.83    0.40 
  -1  14   0   18.04    0.54 
   1  14   0   18.57    0.48 
  -1  14   0   18.20    0.40 
  -1  14   0   16.63    0.21 
  -1 -14   0   17.74    0.29 
   1 -14   0   16.94    0.20 
  -1 -14   0   16.50    0.12 
   1 -14   0   17.10    0.32 
   1 -14   0   16.47    0.11 
   1 -14   0   18.33    0.58 
  -1  14  -1    3.38    0.19 
   1  14   1    3.27    0.18 
   1  14   1    3.89    0.37 
   1  14   1    3.92    0.43 
  -1  14  -1    3.99    0.34 
  -1  14  -1    4.12    0.51 
   1  14   1    4.29    0.50 
  -1 -14  -1    3.79    0.32 
   1 -14   1    3.56    0.30 
   1 -14   1    3.93    0.54 
   1 -14   1    3.37    0.21 
  -1  14  -2   29.15    0.42 
  -1  14  -2   31.48    0.69 
   1  14   2   30.79    0.61 
   1  14   2   28.40    0.40 
   1  14   2   29.98    0.53 
   1 -14   2   28.38    0.37 
  -1 -14  -2   28.80    0.42 
   1 -14   2   27.05    0.29 
   1 -14   2   29.77    0.68 
   1  14   3   21.58    0.22 
   1  14   3   24.30    0.68 
  -1  14  -3   21.04    0.22 
   1  14   3   23.92    0.52 
   1  14   3   21.08    0.14 
  -1  14  -3   24.77    0.55 
  -1  14  -3   22.82    0.37 
   1  14   3   22.71    0.45 
   1 -14   3   24.08    0.67 
  -1 -14  -3   22.36    0.34 
  -1 -14  -3   24.62    0.54 
  -1 -14  -3   21.05    0.17 
   1 -14   3   21.56    0.22 
   1 -14   3   22.67    0.33 
   1  14   4    2.73    0.59 
   1  14   4    2.80    0.31 
  -1  14  -4    2.71    0.54 
  -1  14  -4    2.76    0.30 
   1  14   4    2.74    0.18 
   1  14   4    2.64    0.11 
   1 -14   4    2.71    0.25 
   1 -14   4    2.53    0.23 
  -1 -14  -4    2.43    0.15 
   1 -14   4    2.65    0.08 
   1 -14   4    3.04    0.59 
  -1  14  -5    3.53    0.69 
   1  14   5    4.07    0.66 
   1  14   5    3.15    0.17 
   1  14   5    2.84    0.12 
  -1  14  -5    3.07    0.30 
   1  14   5    3.43    0.44 
   1 -14   5    3.10    0.25 
  -1 -14  -5    2.91    0.18 
   1 -14   5    2.99    0.63 
   1 -14   5    3.69    0.27 
   1 -14   5    2.94    0.08 
   1  14   6   19.73    0.56 
  -1  14  -6   19.63    0.45 
   1  14   6   22.38    0.84 
   1 -14   6   17.72    0.32 
   1 -14   6   22.69    0.83 
   1 -14   6   19.55    0.36 
  -1  14  -7    5.89    0.35 
   1  14   7    5.54    0.48 
   1  14   7    6.90    0.61 
  -1 -14  -7    5.60    0.19 
   1 -14   7    5.48    0.72 
   1 -14   7    5.42    0.26 
  -1  14  -8    2.45    0.39 
   1  14   8    3.40    0.80 
   1 -14   8    2.05    0.27 
   1 -14   8    1.65    0.76 
  -1 -14  -8    2.55    0.28 
  -1  14  -9    9.14    0.39 
   1  14   9    9.54    0.88 
   1 -14   9    8.64    0.15 
  -1 -14  -9    8.57    0.33 
   1 -14   9    8.40    0.30 
   1 -14   9    9.98    0.71 
   1  14  10    6.36    0.94 
  -1  14 -10    5.56    0.48 
   1 -14  10    5.99    0.35 
  -1 -14 -10    5.36    0.37 
   1 -14  10    6.68    0.96 
   1 -14  10    5.40    0.20 
  -1  14 -11    0.67    0.45 
   1  14  11    0.73    0.72 
  -1 -14 -11    0.93    0.38 
   1 -14  11    0.85    0.30 
   1 -14  11    0.92    0.95 
  -1  14 -12    1.66    0.50 
   1  14  12    1.89    1.03 
   1 -14  12    1.98    0.79 
  -1 -14 -12    0.37    0.39 
   1 -14  12    1.35    0.30 
   1  14  13   -0.42    1.03 
  -1  14 -13   -0.25    0.51 
   1 -14  13   -0.68    1.08 
   1 -14  13   -0.21    0.35 
  -1 -14 -13   -0.79    0.42 
   1  14  14    1.29    0.90 
  -1 -14 -14    0.25    0.48 
   1 -14  14    0.19    0.34 
   1 -14  14    0.83    1.15 
   1 -14  15    0.78    0.95 
  -1  15  15    1.48    1.20 
  -1 -15  15    0.13    1.11 
   1  15 -14   -0.44    0.55 
  -1  15  14    0.05    1.09 
   1 -15 -14   -0.79    0.43 
  -1 -15  14   -0.42    1.13 
  -1  15  13    7.88    1.14 
   1  15 -13    7.50    0.64 
  -1 -15  13    6.41    0.34 
  -1 -15  13    7.25    1.07 
   1 -15 -13    6.15    0.45 
  -1  15  12    7.11    0.81 
   1  15 -12    7.30    0.54 
   1 -15 -12    6.39    0.42 
  -1 -15  12    6.35    0.31 
  -1 -15  12    6.49    1.02 
   1  15 -11    0.01    0.49 
  -1  15  11    0.01    0.98 
  -1 -15  11   -0.07    0.31 
   1 -15 -11   -0.56    0.35 
  -1 -15  11    0.13    0.96 
  -1  15  10    1.22    0.90 
   1  15 -10    0.33    0.46 
  -1 -15  10    0.59    0.88 
   1 -15 -10    1.07    0.26 
  -1 -15  10    0.17    0.30 
   1  15  -9    2.20    0.47 
  -1  15   9    2.87    0.88 
  -1 -15   9    1.27    0.29 
  -1 -15   9    2.16    0.13 
   1 -15  -9    1.77    0.24 
  -1 -15   9    2.97    0.82 
  -1  15   8   -0.01    0.79 
   1  15  -8    1.10    0.43 
  -1 -15   8    0.33    0.29 
  -1 -15   8    0.92    0.11 
   1 -15  -8    0.70    0.22 
  -1 -15   8    0.78    0.58 
  -1  15   7    3.99    0.76 
  -1  15   7    3.86    0.26 
   1  15  -7    3.40    0.43 
  -1 -15   7    3.16    0.30 
  -1 -15   7    2.77    0.70 
  -1 -15   7    2.88    0.11 
  -1  15   6    9.08    0.21 
  -1  15   6    9.20    0.49 
   1  15  -6    9.92    0.44 
  -1  15   6   10.60    0.76 
   1  15  -6   10.62    0.66 
  -1 -15   6    8.98    0.28 
  -1 -15   6   10.92    0.72 
  -1 -15   6    8.79    0.08 
   1 -15  -6    8.96    0.20 
   1  15  -5    2.93    0.36 
  -1  15   5    3.06    0.43 
  -1  15   5    2.70    0.18 
  -1  15   5    3.60    0.67 
   1  15  -5    2.76    0.44 
  -1 -15   5    2.56    0.28 
   1 -15  -5    2.72    0.16 
  -1 -15   5    2.73    0.61 
  -1 -15   5    3.07    0.25 
  -1 -15   5    2.87    0.06 
  -1  15   4    0.32    0.43 
  -1  15   4   -0.03    0.11 
   1  15  -4   -0.08    0.54 
  -1  15   4    0.05    0.48 
   1  15  -4    0.32    0.36 
  -1  15   4    0.01    0.19 
  -1 -15   4    0.01    0.06 
   1 -15  -4   -0.06    0.14 
  -1 -15   4    0.02    0.28 
  -1 -15   4   -0.21    0.23 
  -1 -15   4    0.10    0.45 
   1 -15  -4    0.13    0.47 
  -1  15   3   19.11    0.15 
   1  15  -3   21.22    0.45 
  -1  15   3   23.93    0.76 
  -1  15   3   19.65    0.22 
  -1  15   3   21.18    0.49 
  -1 -15   3   19.96    0.30 
   1 -15  -3   19.13    0.17 
  -1 -15   3   21.58    0.40 
  -1  15   2    1.05    0.19 
  -1  15   2    0.98    0.09 
  -1  15   2    0.95    0.43 
   1  15  -2    1.17    0.36 
  -1  15   2    0.54    0.48 
   1  15  -2    1.54    0.52 
  -1  15   2    1.16    0.39 
   1 -15  -2    0.84    0.34 
   1 -15  -2    1.00    0.11 
  -1 -15   2    1.06    0.23 
  -1 -15   2    1.00    0.08 
  -1 -15   2    0.76    0.30 
  -1 -15   2    1.02    0.53 
   1 -15  -2    1.05    0.15 
   1  15  -1   38.88    0.75 
  -1  15   1   40.60    0.94 
   1  15  -1   40.63    0.56 
   1  15  -1   39.86    0.82 
  -1  15   1   39.35    0.89 
  -1  15   1   40.16    0.82 
   1  15  -1   40.31    0.74 
  -1  15   1   39.65    0.68 
   1  15  -1   38.74    0.71 
  -1 -15   1   39.49    0.80 
  -1 -15   1   41.72    0.89 
   1 -15  -1   40.52    0.82 
   1 -15  -1   41.20    0.97 
  -1 -15   1   39.47    0.66 
   1 -15  -1   40.04    0.81 
   1  15   0   58.70    1.00 
   1  15   0   59.44    0.96 
   1  15   0   59.65    0.93 
  -1  15   0   60.77    0.73 
   1  15   0   60.38    0.79 
  -1  15   0   60.56    0.98 
   1  15   0   60.24    0.67 
  -1  15   0   58.30    0.93 
  -1  15   0   59.60    0.96 
  -1  15   0   60.29    0.79 
   1 -15   0   60.39    1.06 
  -1 -15   0   60.26    0.84 
  -1 -15   0   59.45    0.90 
   1 -15   0   62.09    0.99 
   1 -15   0   60.01    0.82 
   1 -15   0   59.25    0.85 
  -1  15  -1    0.73    0.35 
   1  15   1    1.08    0.51 
   1  15   1   -0.02    0.54 
   1  15   1    0.54    0.09 
   1  15   1    0.45    0.17 
   1  15   1    0.58    0.38 
  -1  15  -1    1.36    0.53 
  -1  15  -1    0.78    0.56 
  -1 -15  -1    0.51    0.12 
   1 -15   1    0.57    0.22 
   1 -15   1    0.63    0.09 
   1 -15   1    0.05    0.28 
  -1 -15  -1    0.32    0.24 
   1 -15   1    1.02    0.42 
  -1  15  -2    0.84    0.53 
   1  15   2    0.60    0.09 
  -1  15  -2    0.46    0.33 
   1  15   2    0.59    0.19 
   1  15   2    0.69    0.43 
   1  15   2    0.31    0.38 
   1  15   2    0.81    0.51 
   1 -15   2    0.77    0.57 
   1 -15   2    0.49    0.29 
  -1 -15  -2    0.71    0.14 
   1 -15   2    0.55    0.09 
   1 -15   2    0.75    0.22 
   1  15   3    1.95    0.42 
   1  15   3    2.23    0.62 
  -1  15  -3    2.08    0.34 
   1  15   3    1.80    0.10 
  -1  15  -3    2.40    0.55 
   1  15   3    2.22    0.53 
   1 -15   3    2.15    0.25 
  -1 -15  -3    1.88    0.15 
   1 -15   3    2.77    0.48 
   1 -15   3    1.89    0.09 
   1 -15   3    2.13    0.29 
   1  15   4    0.60    0.41 
   1  15   4    0.47    0.43 
  -1  15  -4    0.43    0.34 
   1  15   4    0.89    0.63 
   1  15   4    0.27    0.11 
   1 -15   4    0.69    0.63 
   1 -15   4    0.34    0.08 
   1 -15   4    0.18    0.23 
  -1 -15  -4    0.13    0.16 
   1 -15   4    0.20    0.27 
  -1  15  -5   -0.04    0.33 
   1  15   5    0.38    0.34 
   1  15   5    0.13    0.64 
  -1 -15  -5    0.11    0.18 
   1 -15   5    0.34    0.67 
   1 -15   5   -0.34    0.29 
   1 -15   5    0.18    0.09 
   1 -15   5   -0.03    0.25 
   1  15   6   -0.12    0.70 
   1  15   6    0.60    0.47 
  -1  15  -6    0.14    0.38 
  -1 -15  -6   -0.12    0.20 
   1 -15   6    0.00    0.25 
   1 -15   6    0.59    0.31 
   1 -15   6    0.57    0.72 
  -1  15  -7    1.88    0.38 
   1  15   7    2.29    0.63 
   1  15   7    2.10    0.52 
   1 -15   7    1.04    0.29 
   1 -15   7    2.64    0.80 
  -1 -15  -7    0.99    0.26 
   1  15   8   18.40    0.48 
  -1  15  -8   19.16    0.45 
   1  15   8   21.00    0.93 
  -1 -15  -8   17.33    0.33 
   1 -15   8   17.49    0.32 
   1 -15   8   19.65    0.91 
  -1  15  -9    0.02    0.42 
   1  15   9    0.48    0.87 
   1 -15   9    0.23    0.16 
  -1 -15  -9   -0.14    0.24 
   1 -15   9   -0.44    0.65 
   1 -15   9   -0.01    0.30 
   1  15  10    7.45    0.95 
  -1  15 -10    6.82    0.48 
   1 -15  10    7.10    0.96 
   1 -15  10    6.33    0.32 
  -1 -15 -10    7.40    0.39 
   1  15  11    1.64    0.76 
  -1  15 -11    1.03    0.48 
   1 -15  11    0.99    0.34 
   1 -15  11    0.80    0.99 
  -1 -15 -11    1.10    0.29 
   1  15  12    2.39    1.07 
  -1  15 -12    0.33    0.48 
   1 -15  12    3.30    1.07 
  -1 -15 -12    1.39    0.42 
   1 -15  12    1.87    0.32 
   1  15  13    2.58    1.08 
   1 -15  13    1.14    0.34 
   1 -15  13    1.84    1.14 
  -1 -15 -13    1.02    0.42 
   1  15  14    1.56    1.20 
  -1 -15 -14   -0.29    0.49 
   1 -15  14    1.35    1.20 
   1 -15  14    0.25    0.35 
   1  16 -14   -0.81    0.62 
  -1  16  14    1.50    0.92 
  -1 -16  14   -0.42    0.87 
   1 -16 -14   -0.94    0.47 
  -1  16  13    1.71    1.11 
   1  16 -13    0.89    0.63 
  -1 -16  13    0.24    1.08 
  -1 -16  13    1.04    0.36 
   1 -16 -13    0.83    0.45 
  -1  16  12    1.10    1.06 
   1  16 -12   -0.26    0.52 
  -1 -16  12    0.29    0.32 
   1 -16 -12   -0.56    0.40 
  -1 -16  12    0.98    1.04 
  -1  16  11   -0.18    0.99 
   1  16 -11   -0.76    0.50 
  -1 -16  11   -1.27    0.95 
  -1 -16  11   -0.73    0.31 
   1 -16 -11   -0.63    0.37 
  -1  16  10    6.15    0.94 
   1  16 -10    5.22    0.50 
  -1 -16  10    5.59    0.33 
   1 -16 -10    5.34    0.25 
  -1 -16  10    6.12    0.93 
   1  16  -9    0.13    0.53 
  -1  16   9    0.99    0.91 
  -1 -16   9   -0.40    0.33 
   1 -16  -9   -0.05    0.25 
  -1 -16   9    0.17    0.21 
  -1 -16   9   -0.04    0.65 
   1  16  -8    6.67    0.48 
  -1  16   8    8.19    0.91 
  -1 -16   8    6.06    0.12 
  -1 -16   8    8.46    0.86 
  -1 -16   8    6.19    0.33 
   1 -16  -8    5.61    0.24 
   1  16  -7   12.88    0.48 
  -1  16   7   13.29    0.58 
  -1  16   7   15.35    0.91 
  -1 -16   7   13.41    0.79 
  -1 -16   7   11.66    0.32 
  -1  16   6   25.28    0.48 
   1  16  -6   25.16    0.51 
  -1  16   6   26.14    0.86 
  -1 -16   6   26.44    0.82 
  -1 -16   6   23.77    0.35 
   1  16  -5   33.93    0.53 
  -1  16   5   33.57    0.59 
  -1  16   5   36.60    0.90 
  -1 -16   5   37.11    0.86 
  -1 -16   5   31.77    0.36 
  -1  16   4    5.22    0.71 
  -1  16   4    3.56    0.12 
   1  16  -4    3.88    0.40 
  -1  16   4    4.24    0.47 
   1  16  -4    4.86    0.61 
  -1 -16   4    3.48    0.07 
  -1 -16   4    4.99    0.66 
  -1 -16   4    3.76    0.21 
   1 -16  -4    3.56    0.16 
  -1  16   3    1.85    0.45 
  -1  16   3    1.34    0.12 
   1  16  -3    1.46    0.44 
  -1  16   3    1.47    0.64 
   1  16  -3    1.30    0.37 
  -1 -16   3    1.60    0.46 
  -1 -16   3    1.25    0.07 
   1 -16  -3    1.27    0.14 
  -1 -16   3    1.35    0.24 
   1  16  -2   12.07    0.66 
   1  16  -2    9.59    0.36 
  -1  16   2    9.44    0.46 
  -1  16   2   10.26    0.68 
  -1 -16   2   10.38    0.64 
  -1 -16   2    8.39    0.21 
  -1  16   1    0.62    0.41 
   1  16  -1    0.20    0.07 
   1  16  -1   -0.32    0.55 
  -1  16   1    0.05    0.09 
   1  16  -1    0.62    0.52 
  -1  16   1    0.58    0.61 
   1  16  -1    0.42    0.30 
  -1  16   1   -0.02    0.57 
  -1 -16   1   -0.03    0.09 
   1 -16  -1    0.27    0.17 
   1 -16  -1    0.08    0.12 
  -1 -16   1    0.41    0.44 
  -1  16   0    2.38    0.41 
   1  16   0    2.07    0.40 
   1  16   0    2.29    0.46 
  -1  16   0    2.51    0.60 
   1  16   0    1.59    0.51 
  -1  16   0    2.53    0.56 
   1 -16   0    2.21    0.24 
   1 -16   0    1.79    0.12 
   1 -16   0    2.36    0.46 
   1 -16   0    1.50    0.32 
  -1 -16   0    1.68    0.11 
  -1  16  -1    3.89    0.45 
   1  16   1    3.31    0.60 
   1  16   1    3.04    0.09 
   1  16   1    3.38    0.42 
   1  16   1    3.29    0.53 
  -1  16  -1    3.06    0.38 
  -1  16  -1    3.20    0.60 
   1 -16   1    3.03    0.24 
   1 -16   1    3.15    0.33 
   1 -16   1    3.50    0.45 
   1 -16   1    3.03    0.10 
  -1 -16  -1    2.98    0.13 
   1  16   2    0.27    0.42 
   1  16   2    0.10    0.57 
  -1  16  -2    0.52    0.37 
   1  16   2    0.33    0.10 
   1  16   2    0.81    0.54 
   1 -16   2    0.46    0.09 
   1 -16   2    0.37    0.45 
   1 -16   2    0.44    0.18 
   1 -16   2    0.27    0.29 
  -1 -16  -2    0.32    0.13 
  -1  16  -3   15.53    0.43 
   1  16   3   16.09    0.73 
   1  16   3   17.73    0.69 
   1  16   3   14.64    0.49 
   1 -16   3   15.87    0.72 
   1 -16   3   13.81    0.29 
   1 -16   3   15.13    0.37 
   1  16   4    0.93    0.12 
   1  16   4    2.77    0.70 
   1  16   4    1.16    0.44 
  -1  16  -4    1.64    0.38 
   1 -16   4    1.79    0.31 
   1 -16   4    0.91    0.20 
   1 -16   4    1.91    0.53 
   1 -16   4    1.13    0.09 
  -1 -16  -4    1.22    0.18 
  -1  16  -5    0.25    0.40 
   1  16   5    0.43    0.37 
   1  16   5    0.92    0.72 
   1 -16   5    0.05    0.09 
   1 -16   5    0.01    0.21 
  -1 -16  -5    0.04    0.20 
   1 -16   5    0.28    0.29 
   1 -16   5   -0.23    0.52 
   1  16   6    6.33    0.54 
   1  16   6    6.20    0.76 
  -1  16  -6    6.50    0.42 
  -1 -16  -6    4.38    0.23 
   1 -16   6    4.76    0.30 
   1 -16   6    5.44    0.32 
   1 -16   6    5.98    0.78 
  -1  16  -7    3.32    0.40 
   1  16   7    2.84    0.54 
   1  16   7    3.16    0.83 
   1 -16   7    2.24    0.30 
   1 -16   7    3.17    0.79 
  -1 -16  -7    2.46    0.26 
   1  16   8    9.49    0.61 
  -1  16  -8    8.77    0.43 
   1  16   8    8.88    0.91 
  -1 -16  -8    7.63    0.31 
   1 -16   8   10.00    0.90 
   1 -16   8    7.53    0.32 
  -1  16  -9   39.45    0.63 
   1  16   9   41.98    1.13 
   1 -16   9   40.27    1.09 
  -1  16 -10    0.51    0.43 
   1  16  10    0.98    0.98 
  -1 -16 -10    0.28    0.37 
   1 -16  10   -0.81    0.93 
   1 -16  10    0.27    0.31 
  -1  16 -11   -0.39    0.49 
   1  16  11    0.15    0.77 
   1 -16  11   -0.52    0.32 
  -1 -16 -11   -0.76    0.37 
   1 -16  11   -0.05    1.02 
   1  16  12    0.68    1.05 
  -1  16 -12    0.15    0.50 
   1 -16  12    0.42    0.36 
  -1 -16 -12   -0.19    0.42 
   1 -16  12    0.27    1.09 
   1  16  13    0.48    0.88 
   1 -16  13   -1.15    1.12 
  -1 -16 -13   -1.58    0.43 
   1 -16  13   -0.35    0.32 
   1  16  14    1.50    1.22 
   1 -16  14    1.13    0.41 
   1 -16  14   -0.65    1.19 
  -1  17  14    1.19    1.20 
  -1 -17  14    0.01    1.19 
   1  17 -13   -0.65    0.64 
  -1  17  13   -0.04    1.10 
   1 -17 -13   -1.35    0.43 
  -1 -17  13    0.54    1.10 
  -1 -17  13   -0.45    0.38 
   1  17 -12    7.80    0.63 
  -1  17  12    9.20    1.17 
  -1 -17  12    7.50    0.35 
   1 -17 -12    6.50    0.43 
  -1 -17  12    8.89    0.87 
   1  17 -11    3.39    0.53 
  -1  17  11    3.56    1.01 
  -1 -17  11    4.31    0.77 
  -1 -17  11    3.33    0.34 
   1 -17 -11    2.83    0.38 
   1  17 -10    2.99    0.51 
  -1  17  10    3.98    0.94 
  -1 -17  10    2.52    0.32 
   1 -17 -10    2.79    0.25 
  -1 -17  10    2.92    0.92 
   1  17  -9    4.54    0.56 
  -1  17   9    5.95    0.76 
  -1 -17   9    3.53    0.33 
  -1 -17   9    3.60    0.87 
   1 -17  -9    4.56    0.27 
   1  17  -8    1.20    0.47 
  -1  17   8    1.67    0.85 
  -1 -17   8    1.83    0.08 
  -1 -17   8    1.79    0.12 
   1 -17  -8    1.58    0.24 
  -1 -17   8    1.25    0.32 
  -1 -17   8    2.35    0.85 
  -1  17   7    0.16    0.84 
   1  17  -7    0.61    0.45 
  -1  17   7    1.26    0.57 
  -1 -17   7    0.51    0.08 
   1 -17  -7    0.39    0.22 
  -1 -17   7    0.42    0.79 
  -1 -17   7    0.42    0.24 
  -1  17   6   24.10    0.75 
   1  17  -6   22.65    0.50 
  -1  17   6   23.61    0.61 
  -1 -17   6   21.46    0.35 
  -1 -17   6   24.44    0.71 
  -1  17   5   41.50    0.98 
  -1  17   5   38.01    0.97 
   1  17  -5   35.71    0.58 
  -1 -17   5   38.30    0.54 
  -1 -17   5   38.08    0.92 
  -1  17   4    8.13    0.75 
   1  17  -4    7.97    0.45 
  -1  17   4    8.18    0.51 
  -1 -17   4    7.32    0.29 
  -1 -17   4    8.14    0.69 
  -1  17   3    5.22    0.48 
   1  17  -3    4.78    0.44 
   1  17  -3    5.56    0.51 
  -1  17   3    4.31    0.12 
  -1  17   3    5.73    0.72 
   1 -17  -3    4.26    0.16 
  -1 -17   3    5.49    0.66 
  -1 -17   3    4.74    0.22 
   1  17  -2    0.49    0.57 
  -1  17   2    0.25    0.66 
  -1  17   2    0.21    0.11 
   1  17  -2    0.06    0.39 
  -1  17   2    0.28    0.43 
   1  17  -2   -0.04    0.60 
  -1 -17   2    0.76    0.60 
   1 -17  -2    0.31    0.15 
  -1 -17   2    0.44    0.25 
  -1 -17   2    0.26    0.09 
   1  17  -1    1.92    0.59 
   1  17  -1    1.55    0.32 
  -1  17   1    1.69    0.34 
   1  17  -1    1.33    0.08 
  -1  17   1    2.22    0.65 
   1  17  -1    1.44    0.61 
  -1  17   1    1.36    0.10 
   1 -17  -1    1.20    0.23 
   1 -17  -1    1.34    0.13 
  -1 -17   1    0.78    0.59 
  -1 -17   1    1.22    0.10 
  -1  17   0    0.66    0.63 
   1  17   0    0.06    0.08 
   1  17   0    0.38    0.56 
   1  17   0    0.07    0.32 
  -1  17   0    1.06    0.43 
  -1  17   0    0.21    0.09 
   1  17   0    0.54    0.62 
   1 -17   0    0.16    0.24 
  -1 -17   0   -0.09    0.12 
   1 -17   0   -0.23    0.60 
   1 -17   0    0.04    0.10 
   1  17   1    3.60    0.34 
   1  17   1    3.26    0.10 
  -1  17  -1    4.51    0.43 
  -1  17  -1    3.62    0.63 
   1  17   1    3.93    0.58 
   1  17   1    3.77    0.63 
   1 -17   1    3.44    0.26 
   1 -17   1    4.15    0.64 
  -1 -17  -1    3.26    0.13 
   1 -17   1    3.14    0.11 
   1  17   2    6.28    0.34 
  -1  17  -2    7.12    0.42 
   1  17   2    6.85    0.50 
   1  17   2    6.27    0.11 
   1 -17   2    6.13    0.10 
   1 -17   2    6.56    0.21 
  -1 -17  -2    6.30    0.16 
   1 -17   2    6.61    0.52 
  -1  17  -3    0.45    0.39 
   1  17   3    0.90    0.36 
   1  17   3    0.61    0.11 
   1  17   3    0.64    0.52 
   1 -17   3    0.41    0.09 
   1 -17   3    0.45    0.28 
   1 -17   3    0.40    0.67 
  -1 -17  -3    0.26    0.18 
   1  17   4    8.38    0.38 
  -1  17  -4    9.56    0.43 
   1  17   4    9.97    0.61 
   1 -17   4    9.60    0.74 
  -1 -17  -4    8.16    0.19 
   1 -17   4    8.24    0.29 
   1 -17   4    8.17    0.10 
  -1  17  -5    6.11    0.46 
   1  17   5    6.00    0.78 
   1  17   5    6.24    0.54 
   1 -17   5    6.16    0.78 
   1 -17   5    5.07    0.32 
   1  17   6   13.47    0.87 
   1  17   6   13.03    0.60 
  -1  17  -6   12.17    0.44 
  -1 -17  -6   10.92    0.24 
   1 -17   6   11.41    0.33 
   1 -17   6   12.83    0.82 
   1  17   7    2.58    0.84 
  -1  17  -7    3.79    0.43 
   1  17   7    3.03    0.57 
   1 -17   7    2.90    0.11 
  -1 -17  -7    2.80    0.27 
   1 -17   7    2.57    0.30 
   1 -17   7    3.33    0.64 
  -1  17  -8    1.10    0.44 
   1  17   8    1.46    0.58 
   1  17   8    1.44    0.89 
   1 -17   8    1.30    0.69 
   1 -17   8    1.22    0.34 
  -1 -17  -8    0.85    0.31 
   1  17   9    0.57    0.90 
  -1  17  -9    0.44    0.50 
   1 -17   9   -0.49    0.90 
   1 -17   9   -0.17    0.34 
  -1 -17  -9   -0.22    0.32 
   1  17  10   -0.40    0.96 
  -1  17 -10   -0.39    0.45 
  -1 -17 -10   -0.75    0.37 
   1 -17  10   -0.64    0.95 
   1 -17  10   -0.50    0.33 
  -1  17 -11    0.80    0.46 
   1  17  11    0.76    1.02 
  -1 -17 -11    0.84    0.39 
   1 -17  11    1.18    0.34 
   1 -17  11    1.57    0.79 
   1  17  12    0.26    1.05 
  -1  17 -12    0.24    0.54 
   1 -17  12    0.45    1.10 
  -1 -17 -12   -0.25    0.42 
   1 -17  12   -0.12    0.38 
   1  17  13    0.62    1.17 
   1 -17  13   -0.62    1.18 
  -1 -17 -13   -0.81    0.47 
   1 -17  13   -0.50    0.34 
   1  18 -13    0.21    0.67 
  -1  18  13    0.84    1.18 
   1 -18 -13    0.39    0.36 
  -1 -18  13    0.50    0.40 
  -1 -18  13   -0.17    1.10 
  -1  18  12    1.99    1.13 
   1  18 -12    2.11    0.62 
   1 -18 -12    1.28    0.43 
  -1 -18  12    1.94    1.08 
  -1 -18  12    2.08    0.36 
   1  18 -11    1.36    0.54 
  -1  18  11    1.75    0.78 
  -1 -18  11    1.01    0.99 
   1 -18 -11    1.23    0.37 
  -1 -18  11    1.88    0.34 
   1  18 -10   13.34    0.58 
  -1  18  10   15.35    1.11 
   1 -18 -10   11.89    0.27 
  -1 -18  10   11.88    0.36 
  -1 -18  10   12.90    0.96 
  -1  18   9   -0.12    0.97 
   1  18  -9   -0.03    0.52 
  -1 -18   9   -0.52    0.34 
  -1 -18   9   -0.68    0.90 
   1 -18  -9   -0.37    0.27 
   1  18  -8    1.29    0.52 
  -1  18   8    1.59    0.95 
  -1 -18   8    0.68    0.08 
   1 -18  -8    0.98    0.27 
  -1 -18   8    0.16    0.81 
  -1 -18   8    0.32    0.36 
   1  18  -7    3.02    0.55 
  -1  18   7    3.30    0.70 
  -1  18   7    2.78    0.45 
   1 -18  -7    2.45    0.24 
  -1 -18   7    2.85    0.80 
  -1 -18   7    2.25    0.31 
  -1  18   6   22.82    0.94 
   1  18  -6   22.62    0.55 
  -1  18   6   22.64    0.65 
  -1 -18   6   20.89    0.38 
  -1 -18   6   23.67    0.89 
  -1  18   5    0.70    0.39 
   1  18  -5    1.24    0.46 
  -1  18   5    1.59    0.61 
  -1 -18   5    1.00    0.08 
  -1 -18   5    0.91    0.31 
   1 -18  -5    0.67    0.19 
  -1 -18   5    1.23    0.72 
  -1  18   4    5.44    0.78 
  -1  18   4    7.18    0.57 
   1  18  -4    6.61    0.50 
  -1 -18   4    4.93    0.30 
  -1 -18   4    4.63    0.69 
   1 -18  -4    5.49    0.21 
  -1 -18   4    5.01    0.09 
   1  18  -3    1.99    0.47 
  -1  18   3    1.31    0.49 
  -1  18   3    0.86    0.73 
   1 -18  -3    1.13    0.16 
  -1 -18   3    1.31    0.28 
  -1 -18   3    1.02    0.09 
  -1 -18   3    2.03    0.71 
   1  18  -2    1.23    0.46 
   1  18  -2    0.03    0.66 
  -1  18   2    0.84    0.70 
  -1  18   2    0.36    0.37 
  -1  18   2    0.14    0.11 
  -1 -18   2    0.48    0.64 
  -1 -18   2    0.13    0.11 
   1 -18  -2   -0.01    0.15 
   1  18  -1    3.92    0.36 
  -1  18   1    2.88    0.64 
  -1  18   1    3.53    0.11 
   1  18  -1    4.09    0.67 
  -1  18   1    3.97    0.48 
   1 -18  -1    3.98    0.26 
  -1 -18   1    3.29    0.12 
   1 -18  -1    3.37    0.14 
  -1 -18   1    3.72    0.65 
  -1  18   0    0.14    0.09 
   1  18   0    0.06    0.09 
   1  18   0   -0.13    0.45 
  -1  18   0   -0.40    0.43 
  -1  18   0   -0.20    0.64 
   1  18   0    0.12    0.64 
   1 -18   0    0.01    0.12 
  -1 -18   0    0.01    0.13 
   1 -18   0    0.06    0.25 
   1  18   1    3.61    0.68 
  -1  18  -1    3.12    0.43 
   1  18   1    2.29    0.46 
  -1  18  -1    2.55    0.51 
   1  18   1    2.43    0.10 
   1 -18   1    2.64    0.12 
  -1 -18  -1    2.51    0.15 
   1 -18   1    2.35    0.65 
   1 -18   1    2.62    0.27 
   1  18   2   16.48    0.53 
  -1  18  -2   16.90    0.49 
   1  18   2   17.49    0.64 
   1  18   2   15.14    0.13 
  -1 -18  -2   14.94    0.19 
   1 -18   2   15.21    0.13 
   1 -18   2   15.50    0.25 
   1 -18   2   17.83    0.75 
   1  18   3   23.74    0.70 
   1  18   3   20.65    0.16 
  -1  18  -3   23.48    0.53 
   1  18   3   21.48    0.54 
   1 -18   3   20.61    0.13 
   1 -18   3   21.00    0.33 
  -1 -18  -3   20.44    0.22 
   1 -18   3   22.49    0.64 
   1  18   4    1.98    0.43 
  -1  18  -4    1.62    0.45 
   1  18   4    1.72    0.76 
   1 -18   4    0.25    0.55 
   1 -18   4    0.28    0.30 
  -1  18  -5    0.11    0.42 
   1  18   5    0.65    0.82 
   1  18   5    0.28    0.53 
  -1 -18  -5    0.00    0.21 
   1 -18   5    0.09    0.10 
   1 -18   5    0.84    0.77 
   1 -18   5    0.20    0.32 
   1  18   6    1.23    0.57 
   1  18   6   -0.21    0.78 
  -1  18  -6    0.78    0.50 
  -1 -18  -6    0.85    0.24 
   1 -18   6    0.50    0.32 
   1 -18   6    0.52    0.81 
   1 -18   6    0.86    0.10 
   1  18   7    0.53    0.69 
  -1  18  -7    0.25    0.50 
   1  18   7    1.22    0.60 
   1 -18   7    0.08    0.11 
   1 -18   7   -0.19    0.85 
  -1 -18  -7   -0.22    0.27 
   1 -18   7   -0.36    0.32 
   1  18   8    0.34    0.93 
  -1  18  -8   -0.10    0.45 
   1  18   8    1.28    0.62 
   1 -18   8   -0.91    0.33 
   1 -18   8    0.07    0.91 
  -1 -18  -8   -0.12    0.32 
   1 -18   8    0.22    0.11 
  -1  18  -9    1.14    0.50 
   1  18   9    1.68    0.76 
   1 -18   9    2.60    0.77 
  -1 -18  -9    1.12    0.33 
   1 -18   9    1.40    0.36 
   1  18  10    6.32    0.97 
  -1  18 -10    5.23    0.47 
   1 -18  10    7.07    1.03 
  -1 -18 -10    5.29    0.38 
   1 -18  10    5.26    0.35 
  -1  18 -11    2.37    0.48 
   1  18  11    2.74    1.07 
  -1 -18 -11    2.48    0.41 
   1 -18  11    3.37    1.09 
   1 -18  11    1.83    0.34 
   1  18  12    1.34    1.14 
  -1 -18 -12   -0.70    0.42 
   1 -18  12   -0.05    0.36 
   1 -18  12    0.62    1.15 
   1  18  13    0.62    1.19 
  -1 -18 -13    0.75    0.59 
   1 -18  13    0.19    0.88 
   1 -18  13    1.06    0.37 
  -1  19  13    1.17    1.25 
   1  19 -13    0.39    0.70 
  -1 -19  13    1.18    0.42 
  -1 -19  13    1.19    1.18 
   1  19 -12   -0.91    0.59 
  -1  19  12   -0.21    0.87 
  -1 -19  12    0.12    1.09 
  -1 -19  12   -0.14    0.37 
  -1  19  11    0.88    1.12 
   1  19 -11   -0.70    0.57 
  -1 -19  11   -0.20    0.36 
  -1 -19  11    0.42    1.05 
   1 -19 -11   -0.86    0.38 
  -1  19  10    1.31    1.08 
   1  19 -10   -0.88    0.54 
   1 -19 -10   -0.59    0.33 
  -1 -19  10    1.09    1.02 
  -1 -19  10   -0.40    0.39 
   1  19  -9    1.80    0.54 
  -1  19   9    1.82    1.00 
   1 -19  -9    1.55    0.27 
  -1 -19   9    1.46    0.34 
  -1 -19   9    1.49    0.69 
  -1  19   8   -0.64    0.93 
   1  19  -8    0.44    0.60 
   1 -19  -8   -0.18    0.25 
  -1 -19   8   -0.10    0.36 
  -1 -19   8   -0.06    0.86 
  -1  19   7    5.45    0.64 
   1  19  -7    5.48    0.56 
  -1  19   7    4.44    0.91 
  -1 -19   7    4.34    0.09 
  -1 -19   7    4.52    0.85 
  -1 -19   7    3.75    0.36 
   1 -19  -7    4.52    0.25 
  -1  19   6    0.93    0.89 
  -1  19   6    0.81    0.60 
   1  19  -6    0.54    0.51 
  -1 -19   6    1.02    0.63 
   1 -19  -6    0.37    0.22 
  -1 -19   6    0.20    0.34 
  -1 -19   6    0.21    0.08 
  -1  19   5    3.06    0.57 
   1  19  -5    2.68    0.52 
  -1  19   5    2.31    0.82 
   1 -19  -5    1.91    0.20 
  -1 -19   5    2.10    0.78 
  -1 -19   5    1.92    0.09 
  -1 -19   5    1.45    0.32 
  -1  19   4   14.26    0.90 
   1  19  -4   13.46    0.55 
  -1  19   4   12.62    0.60 
  -1 -19   4   14.55    0.85 
  -1 -19   4   12.31    0.35 
  -1 -19   4   11.63    0.11 
   1 -19  -4   11.63    0.21 
  -1  19   3    2.83    0.52 
   1  19  -3    2.64    0.49 
  -1  19   3    2.26    0.78 
  -1 -19   3    2.32    0.71 
   1 -19  -3    1.88    0.17 
  -1 -19   3    1.79    0.10 
  -1 -19   3    2.10    0.30 
  -1  19   2    1.73    0.55 
  -1  19   2    0.07    0.11 
   1  19  -2   -0.15    0.70 
  -1  19   2   -0.22    0.56 
   1  19  -2    2.20    0.54 
  -1 -19   2    0.05    0.12 
  -1 -19   2   -0.46    0.67 
   1 -19  -2    0.19    0.15 
  -1  19   1    2.68    0.73 
  -1  19   1    2.50    0.12 
  -1  19   1    5.88    0.58 
   1  19  -1    3.32    0.71 
   1  19  -1    3.96    0.52 
   1 -19  -1    2.37    0.21 
   1 -19  -1    2.58    0.16 
  -1 -19   1    2.31    0.13 
   1  19   0   14.28    0.78 
   1  19   0   13.42    0.55 
  -1  19   0   14.82    0.82 
  -1  19   0   16.92    0.64 
   1  19   1    9.68    0.75 
  -1  19  -1   13.07    0.60 
  -1  19  -1    9.67    0.61 
   1  19   1    9.45    0.42 
   1 -19   1    8.76    0.30 
  -1 -19  -1    8.52    0.17 
   1 -19   1    9.10    0.73 
  -1  19  -2   -1.20    0.69 
   1  19   2   -0.38    0.71 
   1  19   2    0.45    0.51 
   1  19   2    0.01    0.12 
  -1 -19  -2   -0.04    0.18 
   1 -19   2    0.05    0.22 
   1 -19   2    0.04    0.11 
   1 -19   2   -0.05    0.71 
  -1  19  -3    0.44    0.51 
   1  19   3   -0.43    0.53 
   1  19   3    0.14    0.57 
   1 -19   3    0.24    0.31 
   1 -19   3   -0.34    0.72 
   1 -19   3    0.13    0.11 
  -1 -19  -3    0.11    0.19 
   1  19   4    2.02    0.79 
   1  19   4    2.37    0.53 
  -1  19  -4    2.83    0.47 
   1 -19   4    2.25    0.11 
   1 -19   4    2.18    0.32 
   1 -19   4    3.90    0.81 
  -1 -19  -4    2.44    0.21 
   1  19   5    2.13    0.67 
  -1  19  -5    2.05    0.48 
   1  19   5    1.84    0.58 
   1 -19   5    1.35    0.34 
   1 -19   5    1.40    0.82 
   1 -19   5    1.23    0.11 
  -1 -19  -5    0.91    0.22 
   1  19   6    0.33    0.59 
   1  19   6    1.41    0.90 
  -1  19  -6    1.46    0.50 
   1 -19   6    0.36    0.11 
  -1 -19  -6    0.27    0.25 
   1 -19   6    0.87    0.84 
   1 -19   6    0.23    0.33 
   1  19   7    6.28    0.50 
  -1  19  -7    5.92    0.50 
   1  19   7    5.35    0.93 
   1 -19   7    4.71    0.35 
  -1 -19  -7    5.52    0.28 
   1 -19   7    4.93    0.86 
   1 -19   7    5.32    0.11 
   1  19   8    1.18    0.66 
  -1  19  -8   -0.89    0.52 
   1  19   8    0.61    0.97 
   1 -19   8   -0.32    0.33 
   1 -19   8   -1.60    0.87 
  -1 -19  -8   -0.14    0.32 
   1 -19   8    0.09    0.11 
   1  19   9   10.50    1.08 
  -1  19  -9    9.19    0.51 
   1 -19   9    8.47    0.38 
   1 -19   9   10.94    1.08 
  -1 -19  -9    7.77    0.33 
   1  19  10    1.89    1.04 
  -1  19 -10    1.11    0.53 
   1 -19  10    1.27    0.36 
  -1 -19 -10    1.46    0.38 
   1 -19  10    2.27    1.06 
   1  19  11    7.16    1.06 
  -1  19 -11    6.07    0.57 
   1 -19  11    6.11    0.43 
  -1 -19 -11    5.54    0.41 
   1 -19  11    6.50    1.11 
   1  19  12    0.71    1.20 
  -1 -19 -12   -1.07    0.43 
   1 -19  12   -0.94    0.37 
   1 -19  12   -1.23    1.13 
   1 -19  13    2.73    1.29 
   1  20 -12   -0.36    0.61 
  -1  20  12    1.06    1.21 
  -1 -20  12   -0.39    1.12 
  -1 -20  12    1.04    0.38 
   1 -20 -12   -0.19    0.44 
   1  20 -11    1.26    0.65 
  -1  20  11    2.96    1.10 
  -1 -20  11    0.56    1.04 
  -1 -20  11    2.77    0.42 
   1 -20 -11    1.56    0.37 
  -1  20  10    0.32    0.83 
   1  20 -10   -1.42    0.62 
  -1 -20  10   -0.12    0.36 
  -1 -20  10   -0.41    0.94 
   1 -20 -10   -0.68    0.35 
  -1  20   9    2.75    1.10 
   1  20  -9    0.94    0.57 
  -1 -20   9    2.04    0.99 
   1 -20  -9    0.60    0.29 
  -1 -20   9    0.73    0.40 
  -1  20   8    5.63    1.02 
   1  20  -8    4.69    0.57 
  -1 -20   8    4.52    0.37 
   1 -20  -8    4.42    0.26 
  -1 -20   8    5.08    0.93 
  -1  20   7    2.37    0.94 
   1  20  -7    2.52    0.55 
  -1  20   7    2.34    0.63 
   1 -20  -7    2.26    0.24 
  -1 -20   7    1.88    0.36 
  -1 -20   7    2.31    0.86 
   1  20  -6    2.10    0.59 
  -1  20   6    1.14    0.72 
  -1  20   6    1.86    0.63 
  -1 -20   6    1.73    0.89 
  -1 -20   6   -0.21    0.36 
   1 -20  -6    0.64    0.24 
   1  20  -5   -0.18    0.53 
  -1  20   5    0.54    0.87 
  -1  20   5    0.02    0.57 
  -1 -20   5   -0.56    0.59 
  -1 -20   5   -0.01    0.26 
  -1 -20   5   -0.01    0.09 
   1 -20  -5    0.03    0.21 
  -1  20   4    0.52    0.84 
   1  20  -4    0.45    0.52 
  -1  20   4    0.52    0.59 
  -1 -20   4    0.44    0.11 
   1 -20  -4    0.45    0.19 
  -1 -20   4    0.44    0.78 
  -1 -20   4    0.36    0.25 
  -1  20   3    0.14    0.43 
   1  20  -3    0.67    0.80 
   1  20  -3   -0.04    0.48 
  -1  20   3    0.95    0.81 
  -1 -20   3    0.10    0.12 
  -1 -20   3    1.09    0.77 
   1 -20  -3   -0.16    0.19 
   1  20  -2    4.28    0.54 
   1  20  -2    3.98    0.79 
  -1  20   2    4.39    0.81 
  -1  20   2    4.85    0.58 
  -1 -20   2    4.33    0.75 
   1 -20  -2    3.59    0.16 
   1  20  -1   28.02    0.79 
  -1  20   1   26.86    0.90 
  -1  20   1   25.24    0.63 
   1  20  -1   25.12    0.62 
  -1  20   0    0.75    0.52 
   1  20   0    0.00    0.10 
  -1  20   0    0.64    0.76 
   1  20   0   -0.46    0.51 
   1  20   0    0.48    0.75 
  -1 -20   0    0.00    0.16 
   1 -20   0    0.05    0.21 
   1 -20   0    0.01    0.14 
  -1  20  -1    1.28    0.73 
   1  20   1    1.30    0.53 
  -1  20  -1    1.48    0.52 
   1  20   1    1.68    0.74 
   1  20   1    1.25    0.11 
  -1 -20  -1    1.16    0.16 
   1 -20   1    1.21    0.13 
   1 -20   1    0.93    0.74 
   1 -20   1    1.27    0.30 
   1  20   2   -0.08    0.54 
   1  20   2   -0.18    0.76 
   1  20   2   -0.06    0.11 
  -1  20  -2    0.80    0.50 
  -1  20  -2   -0.58    0.76 
  -1 -20  -2   -0.27    0.18 
   1 -20   2    0.07    0.30 
   1 -20   2    0.34    0.77 
   1 -20   2   -0.10    0.12 
  -1  20  -3    3.34    0.55 
   1  20   3    2.48    0.60 
   1  20   3    2.78    0.55 
  -1 -20  -3    2.31    0.22 
   1 -20   3    2.57    0.12 
   1 -20   3    2.78    0.79 
   1 -20   3    2.42    0.32 
   1  20   4   12.99    0.90 
   1  20   4   12.15    0.61 
  -1  20  -4   12.62    0.54 
   1 -20   4   13.67    0.90 
   1 -20   4   11.32    0.36 
   1  20   5    2.61    0.90 
  -1  20  -5    1.06    0.51 
   1  20   5    0.25    0.45 
   1 -20   5    0.31    0.35 
   1 -20   5    1.20    0.67 
  -1 -20  -5    0.22    0.23 
   1  20   6   -0.02    0.68 
  -1  20  -6    1.18    0.59 
   1  20   6    0.91    0.64 
   1 -20   6    0.03    0.11 
   1 -20   6   -0.20    0.34 
  -1 -20  -6    0.37    0.28 
   1 -20   6   -1.04    0.85 
   1  20   7    6.37    0.96 
   1  20   7    5.65    0.49 
  -1  20  -7    7.06    0.59 
   1 -20   7    7.14    0.96 
   1 -20   7    5.59    0.11 
   1 -20   7    5.28    0.37 
  -1 -20  -7    5.55    0.29 
  -1  20  -8    1.18    0.52 
   1  20   8    1.29    0.66 
   1  20   8    2.03    1.01 
   1 -20   8    0.87    0.35 
   1 -20   8    2.15    0.97 
  -1 -20  -8    0.85    0.32 
   1  20   9    0.71    0.81 
  -1  20  -9    0.32    0.57 
   1 -20   9    0.19    0.37 
   1 -20   9    1.16    1.01 
  -1 -20  -9   -0.21    0.33 
   1  20  10    0.50    1.05 
  -1  20 -10   -0.50    0.58 
   1 -20  10   -0.13    0.38 
  -1 -20 -10   -0.64    0.38 
   1 -20  10    1.21    1.09 
  -1  20 -11   -1.29    0.58 
   1  20  11    0.75    1.16 
   1 -20  11   -0.34    0.43 
  -1 -20 -11   -0.55    0.41 
   1 -20  11   -0.43    1.11 
   1  20  12   -0.40    1.13 
   1 -20  12   -0.88    1.17 
  -1 -20 -12   -0.81    0.45 
   1 -20  12   -0.08    0.41 
  -1  21  12    1.58    1.18 
   1  21 -12    0.20    0.71 
   1 -21 -12    0.70    0.46 
  -1 -21  12    2.23    0.41 
  -1 -21  12    1.94    1.16 
  -1  21  11    1.30    1.16 
   1  21 -11   -0.09    0.71 
  -1 -21  11    0.52    1.08 
   1 -21 -11    0.05    0.40 
  -1 -21  11    1.20    0.44 
   1  21 -10    1.50    0.68 
  -1  21  10    3.49    1.15 
   1 -21 -10    1.29    0.36 
  -1 -21  10    2.28    0.39 
  -1 -21  10    2.31    1.06 
  -1  21   9   -0.94    1.03 
   1  21  -9   -1.01    0.65 
  -1 -21   9   -0.43    0.94 
   1 -21  -9   -0.57    0.28 
  -1 -21   9   -0.11    0.38 
   1  21  -8    0.03    0.57 
  -1  21   8    1.03    0.78 
   1 -21  -8    0.36    0.27 
  -1 -21   8   -0.42    0.90 
  -1 -21   8    0.43    0.38 
  -1  21   7    0.14    0.73 
  -1  21   7    0.70    0.67 
   1  21  -7   -0.03    0.57 
   1 -21  -7    0.17    0.25 
  -1 -21   7    0.09    0.37 
  -1 -21   7    0.26    0.91 
  -1  21   6    1.35    0.65 
   1  21  -6    0.19    0.58 
  -1  21   6    0.08    0.90 
  -1 -21   6   -0.19    0.35 
  -1 -21   6    0.52    0.87 
   1 -21  -6   -0.19    0.23 
   1  21  -5    2.16    0.61 
  -1  21   5    0.40    0.48 
  -1  21   5    0.45    0.90 
  -1 -21   5    0.17    0.81 
  -1 -21   5   -0.01    0.10 
  -1 -21   5   -0.23    0.27 
   1 -21  -5    0.24    0.23 
  -1  21   4    0.27    0.87 
   1  21  -4    1.39    0.56 
  -1  21   4    1.04    0.63 
  -1 -21   4    0.36    0.12 
  -1 -21   4    0.57    0.80 
  -1 -21   4    0.35    0.34 
   1 -21  -4    0.48    0.21 
  -1  21   3    4.44    0.60 
  -1  21   3    4.06    0.64 
   1  21  -3    4.68    0.84 
   1  21  -3    4.57    0.56 
  -1 -21   3    3.87    0.13 
  -1 -21   3    4.48    0.79 
   1 -21  -3    3.83    0.18 
   1  21  -2    2.00    0.81 
  -1  21   2    1.63    0.82 
  -1  21   2    1.12    0.43 
   1  21  -2    1.12    0.55 
  -1 -21   2    1.68    0.79 
   1 -21  -2    1.28    0.17 
  -1 -21   2    1.00    0.14 
  -1  21   1    4.03    0.58 
   1  21  -1    3.87    0.79 
   1  21  -1    4.23    0.58 
  -1  21   1    5.02    0.85 
  -1 -21   1    3.27    0.16 
   1 -21  -1    3.36    0.18 
  -1  21   0    0.73    0.60 
  -1  21   0    2.34    0.59 
   1  21   0    1.35    0.44 
   1  21   0    1.09    0.60 
   1  21   0    1.15    0.11 
  -1 -21   0    0.96    0.17 
   1 -21   0    1.80    0.32 
   1 -21   0    1.15    0.14 
  -1  21  -1    3.80    0.83 
   1  21   1    2.75    0.58 
   1  21   1    2.64    0.12 
  -1  21  -1    3.28    0.55 
   1  21   1    2.40    0.79 
   1 -21   1    2.40    0.78 
  -1 -21  -1    2.41    0.18 
   1 -21   1    2.47    0.14 
   1 -21   1    2.64    0.24 
  -1  21  -2    0.15    0.81 
   1  21   2   -0.16    0.57 
   1  21   2   -0.11    0.79 
  -1  21  -2    1.17    0.52 
   1 -21   2    0.05    0.13 
   1 -21   2    1.23    0.81 
   1 -21   2    0.06    0.31 
  -1 -21  -2    0.26    0.21 
  -1  21  -3    2.14    0.54 
   1  21   3    0.83    0.63 
   1  21   3    1.25    0.58 
   1 -21   3    1.15    0.34 
  -1 -21  -3    1.22    0.21 
   1 -21   3    1.34    0.13 
   1 -21   3    1.51    0.82 
   1  21   4   10.97    0.93 
   1  21   4    9.98    0.63 
   1 -21   4   10.91    0.91 
   1 -21   4    9.68    0.39 
   1 -21   4    9.25    0.13 
  -1 -21  -4    9.64    0.28 
   1  21   5    4.37    0.89 
  -1  21  -5    4.13    0.60 
   1  21   5    4.05    0.49 
   1 -21   5    3.80    0.88 
  -1 -21  -5    3.39    0.24 
   1 -21   5    3.93    0.13 
   1 -21   5    3.41    0.36 
   1  21   6    0.92    0.66 
   1  21   6    1.09    0.95 
  -1  21  -6    0.99    0.53 
   1 -21   6    0.24    0.28 
  -1 -21  -6    0.18    0.31 
   1 -21   6    1.04    0.72 
   1  21   7    4.93    0.51 
  -1  21  -7    5.58    0.55 
   1  21   7    5.93    0.96 
   1 -21   7    4.72    0.38 
   1 -21   7    6.79    0.79 
  -1 -21  -7    4.40    0.30 
  -1  21  -8    1.58    0.59 
   1  21   8    3.45    0.70 
   1  21   8    3.43    1.03 
  -1 -21  -8    2.37    0.33 
   1 -21   8    2.94    1.00 
   1 -21   8    2.25    0.38 
  -1  21  -9   -0.46    0.63 
   1  21   9    0.39    1.08 
   1 -21   9   -0.53    0.35 
  -1 -21  -9   -0.17    0.36 
   1 -21   9    1.08    1.06 
  -1  21 -10    0.73    0.63 
   1  21  10    1.67    1.12 
   1 -21  10    1.95    1.13 
  -1 -21 -10    0.39    0.39 
   1 -21  10    0.37    0.37 
   1  21  11    0.90    1.14 
   1 -21  11   -0.51    0.40 
   1 -21  11   -0.31    1.13 
  -1 -21 -11   -0.59    0.41 
   1  22 -11   -0.31    0.61 
  -1  22  11    2.98    1.17 
   1 -22 -11    0.70    0.41 
  -1 -22  11    2.39    0.41 
  -1 -22  11    1.85    1.14 
  -1  22  10    3.22    1.17 
   1  22 -10    1.71    0.64 
   1 -22 -10    2.05    0.37 
  -1 -22  10    4.38    0.87 
  -1 -22  10    2.64    0.41 
  -1  22   9    4.19    1.13 
   1  22  -9    3.79    0.64 
  -1 -22   9    5.23    1.06 
   1 -22  -9    4.39    0.31 
  -1 -22   9    4.90    0.42 
  -1  22   8    0.36    1.04 
   1  22  -8    0.44    0.62 
   1 -22  -8    0.57    0.29 
  -1 -22   8    0.61    0.29 
  -1 -22   8    0.27    0.95 
  -1  22   7    3.35    1.02 
  -1  22   7    2.71    0.68 
   1  22  -7    2.36    0.61 
  -1 -22   7    3.31    0.42 
   1 -22  -7    2.29    0.26 
  -1 -22   7    2.48    0.90 
   1  22  -6    0.37    0.61 
  -1  22   6   -0.41    0.64 
  -1  22   6   -0.11    0.96 
  -1 -22   6   -0.15    0.28 
  -1 -22   6    0.02    0.89 
   1 -22  -6   -0.23    0.27 
  -1  22   5    5.38    0.52 
  -1  22   5    4.67    0.93 
   1  22  -5    6.73    0.65 
  -1 -22   5    4.73    0.37 
   1 -22  -5    4.76    0.23 
  -1 -22   5    5.90    0.91 
  -1  22   4    0.38    0.63 
  -1  22   4    0.50    0.92 
   1  22  -4    1.10    0.60 
   1 -22  -4    0.17    0.21 
  -1 -22   4    0.50    0.63 
  -1 -22   4    0.23    0.12 
  -1  22   3    7.24    0.70 
   1  22  -3    6.36    0.89 
   1  22  -3    6.26    0.64 
  -1  22   3    4.89    0.88 
  -1 -22   3    5.70    0.85 
   1  22  -2    2.87    0.83 
  -1  22   2    3.87    0.66 
   1  22  -2    5.46    0.64 
  -1  22   2    5.49    0.68 
   1 -22  -2    3.45    0.19 
  -1 -22   2    3.20    0.16 
  -1 -22   2    4.31    0.85 
  -1  22   1   -0.87    0.80 
   1  22  -1    0.47    0.86 
  -1  22   1    1.87    0.64 
   1  22  -1    0.71    0.61 
   1 -22  -1    0.07    0.18 
  -1 -22   1    0.25    0.18 
  -1  22   0    1.80    0.59 
  -1  22   0   -0.59    0.83 
   1  22   0    0.32    0.85 
   1  22   0    0.65    0.60 
   1  22   0    0.21    0.10 
  -1 -22   0    0.11    0.19 
   1 -22   0    0.20    0.17 
   1  22   1    2.13    0.47 
   1  22   1    1.54    0.82 
  -1  22  -1    1.83    0.86 
  -1  22  -1    3.85    0.61 
   1  22   1    1.57    0.12 
  -1 -22  -1    1.74    0.21 
   1 -22   1    1.48    0.15 
   1 -22   1    2.06    0.27 
   1  22   2    0.17    0.65 
  -1  22  -2    0.20    0.85 
   1  22   2    0.66    0.62 
  -1  22  -2    2.89    0.65 
   1 -22   2    0.06    0.14 
   1 -22   2   -0.07    0.35 
  -1 -22  -2    0.19    0.20 
   1 -22   2    1.18    0.87 
   1  22   3   28.10    0.72 
   1  22   3   30.43    1.03 
  -1  22  -3   30.03    0.71 
  -1  22  -3   30.25    1.02 
   1 -22   3   30.04    1.01 
   1 -22   3   26.85    0.43 
  -1 -22  -3   25.68    0.29 
   1  22   4    3.04    0.91 
  -1  22  -4    4.26    0.64 
   1  22   4    3.69    0.49 
   1 -22   4    3.43    0.13 
   1 -22   4    4.29    0.70 
   1 -22   4    3.39    0.37 
  -1 -22  -4    3.02    0.23 
   1  22   5    1.13    0.96 
   1  22   5    1.38    0.67 
  -1  22  -5    1.56    0.57 
   1 -22   5    0.90    0.12 
   1 -22   5    0.68    0.93 
   1 -22   5    0.90    0.38 
  -1 -22  -5    0.62    0.28 
  -1  22  -6    3.68    0.58 
   1  22   6    5.00    1.02 
   1  22   6    3.35    0.68 
  -1 -22  -6    2.63    0.28 
   1 -22   6    3.79    0.96 
   1 -22   6    3.23    0.30 
  -1  22  -7    2.01    0.64 
   1  22   7    1.78    1.02 
   1  22   7    1.55    0.52 
  -1 -22  -7    1.29    0.31 
   1 -22   7    1.42    0.40 
   1 -22   7    2.03    1.00 
  -1  22  -8    0.14    0.57 
   1  22   8   -0.03    1.08 
   1  22   8    0.16    0.70 
   1 -22   8   -0.45    0.39 
  -1 -22  -8   -0.29    0.36 
   1 -22   8    0.36    1.03 
   1  22   9    0.26    1.09 
  -1  22  -9    0.00    0.58 
  -1 -22  -9    0.20    0.37 
   1 -22   9    0.21    1.07 
   1 -22   9    0.61    0.32 
  -1  22 -10    0.39    0.58 
   1  22  10    1.95    1.13 
   1 -22  10    1.95    0.47 
  -1 -22 -10    0.52    0.38 
   1 -22  10    3.02    1.15 
   1  22  11   -0.01    1.23 
  -1 -22 -11   -0.21    0.42 
   1 -22  11    0.02    1.20 
   1 -22  11    0.25    0.44 
   1 -23 -11   -0.47    0.44 
   1  23 -10   -1.58    0.75 
  -1  23  10   -0.16    1.13 
  -1 -23  10   -0.87    1.12 
   1 -23 -10   -0.82    0.36 
  -1 -23  10    0.01    0.43 
  -1  23   9    4.46    1.19 
   1  23  -9    3.18    0.75 
  -1 -23   9    3.02    0.42 
  -1 -23   9    4.86    1.08 
   1 -23  -9    3.03    0.32 
   1  23  -8   -0.64    0.66 
  -1  23   8   -0.10    1.12 
  -1 -23   8   -0.17    0.40 
   1 -23  -8   -0.43    0.28 
  -1 -23   8   -0.53    1.02 
   1  23  -7    0.42    0.66 
  -1  23   7    1.10    0.72 
  -1  23   7    0.75    1.05 
  -1 -23   7    0.87    0.40 
   1 -23  -7    0.26    0.27 
  -1 -23   7    0.64    0.99 
   1  23  -6    3.94    0.63 
  -1  23   6    4.62    1.05 
  -1  23   6    4.24    0.72 
  -1 -23   6    5.05    0.99 
   1 -23  -6    3.28    0.26 
  -1 -23   6    3.45    0.40 
   1  23  -5    0.79    0.63 
  -1  23   5    0.40    0.66 
  -1  23   5    0.33    0.96 
   1 -23  -5   -0.10    0.25 
  -1 -23   5    0.73    0.92 
  -1  23   4    0.65    0.52 
  -1  23   4    1.03    0.97 
   1  23  -4   -0.22    0.62 
   1  23  -4   -0.43    0.87 
  -1 -23   4    0.33    0.66 
   1 -23  -4   -0.10    0.24 
  -1  23   3    1.65    0.94 
   1  23  -3    1.44    0.63 
  -1  23   3    1.64    0.65 
   1  23  -3    1.16    0.90 
   1 -23  -3    0.73    0.22 
  -1 -23   3    1.53    0.87 
  -1 -23   3    0.71    0.15 
  -1  23   2    1.44    0.89 
   1  23  -2    3.05    0.64 
   1  23  -2    2.12    0.88 
  -1  23   2    1.68    0.63 
   1 -23  -2    1.69    0.20 
  -1 -23   2    1.69    0.16 
  -1  23   1    1.02    0.65 
   1  23  -1    0.17    0.62 
  -1  23   1   -0.93    0.85 
   1  23  -1    1.30    0.89 
   1 -23  -1   -0.07    0.19 
  -1  23   0    9.82    0.66 
  -1  23   0    9.60    0.90 
   1  23   0    9.48    0.90 
   1  23   0    8.74    0.65 
   1  23   1    3.55    0.64 
  -1  23  -1    4.15    0.63 
   1  23   1    4.85    0.90 
  -1  23  -1    5.13    0.91 
  -1 -23  -1    3.43    0.21 
   1 -23   1    3.52    0.33 
   1 -23   1    3.40    0.16 
  -1  23  -2    2.63    0.63 
   1  23   2    2.10    0.65 
  -1  23  -2    1.57    0.90 
   1  23   2    2.45    0.93 
  -1 -23  -2    1.45    0.23 
   1 -23   2    2.23    0.90 
   1 -23   2    2.06    0.36 
   1 -23   2    1.42    0.15 
   1  23   3    1.71    0.50 
  -1  23  -3    2.03    0.90 
  -1  23  -3    2.75    0.62 
   1  23   3    2.02    0.93 
   1 -23   3    1.68    0.36 
   1 -23   3    1.63    0.14 
   1 -23   3    2.34    0.91 
  -1 -23  -3    1.60    0.22 
   1  23   4    0.26    0.66 
  -1  23  -4    0.18    0.65 
   1  23   4    0.96    0.95 
   1 -23   4    1.42    0.90 
  -1 -23  -4   -0.08    0.26 
   1 -23   4    0.31    0.37 
   1 -23   4    0.56    0.13 
   1  23   5    0.10    0.97 
  -1  23  -5    0.87    0.62 
   1  23   5    0.28    0.69 
   1 -23   5   -0.24    0.38 
   1 -23   5    0.82    0.95 
  -1 -23  -5   -0.01    0.26 
  -1  23  -6   -0.64    0.64 
   1  23   6    0.07    1.01 
   1  23   6    0.05    0.68 
   1 -23   6   -0.28    0.98 
   1 -23   6    0.06    0.30 
  -1 -23  -6   -0.49    0.28 
   1  23   7    0.15    0.53 
   1  23   7   -0.07    1.05 
  -1  23  -7   -0.08    0.59 
   1 -23   7    1.41    1.05 
   1 -23   7    0.21    0.41 
  -1 -23  -7    0.00    0.35 
   1  23   8    0.36    0.71 
  -1  23  -8   -0.29    0.65 
   1  23   8    0.56    1.09 
   1 -23   8    0.05    0.42 
   1 -23   8   -0.48    1.02 
  -1 -23  -8    0.01    0.34 
  -1  23  -9    1.10    0.68 
   1  23   9    3.12    1.13 
   1 -23   9    1.89    0.40 
  -1 -23  -9    1.30    0.37 
   1 -23   9    2.30    1.14 
   1  23  10   12.05    1.31 
   1 -23  10    9.85    1.22 
  -1 -23 -10    7.73    0.39 
   1 -23  10    9.24    0.46 
  -1  24  10    1.80    1.30 
   1  24 -10   -0.57    0.75 
   1 -24 -10   -0.88    0.40 
  -1 -24  10   -0.61    0.45 
  -1 -24  10   -1.00    1.12 
  -1  24   9    1.19    0.91 
   1  24  -9    0.16    0.72 
  -1 -24   9    0.55    1.08 
   1 -24  -9    0.49    0.34 
  -1 -24   9    1.47    0.45 
   1  24  -8    2.12    0.70 
  -1  24   8    5.16    1.20 
  -1 -24   8    2.59    0.43 
  -1 -24   8    3.71    1.08 
  -1  24   7    2.60    0.78 
   1  24  -7    0.34    0.74 
  -1  24   7    1.21    1.11 
  -1 -24   7    0.58    1.00 
   1 -24  -7    0.64    0.28 
  -1 -24   7    1.25    0.33 
  -1  24   6    3.55    1.04 
   1  24  -6    3.91    0.66 
  -1  24   6    4.23    0.74 
  -1 -24   6    5.00    1.01 
   1 -24  -6    3.87    0.26 
  -1  24   5    7.45    1.01 
  -1  24   5    6.45    0.72 
   1  24  -5    6.71    0.64 
  -1 -24   5    8.06    0.96 
   1 -24  -5    6.37    0.25 
  -1  24   4    0.25    0.68 
   1  24  -4    0.73    0.65 
  -1  24   4    1.55    0.97 
   1  24  -4    2.28    0.77 
  -1 -24   4    1.41    0.90 
   1 -24  -4    0.41    0.24 
  -1  24   3   -0.27    0.68 
   1  24  -3   -0.45    0.65 
  -1  24   3    0.17    0.92 
   1  24  -3    0.62    0.95 
  -1 -24   3   -0.13    0.90 
   1 -24  -3   -0.12    0.24 
   1  24  -2    2.35    0.90 
  -1  24   2    1.63    0.66 
   1  24  -2    0.93    0.62 
  -1  24   2    1.90    0.90 
   1 -24  -2    1.77    0.21 
  -1 -24   2    1.37    0.19 
   1  24  -1    1.24    0.88 
  -1  24   1   -0.40    0.63 
  -1  24   1    0.66    0.88 
   1  24  -1    0.14    0.62 
  -1 -24   1   -0.03    0.18 
   1 -24  -1    0.04    0.19 
  -1  24   0    0.12    0.69 
   1  24   0    0.08    0.63 
   1  24   0    1.69    0.92 
  -1  24   0    0.10    0.65 
  -1 -24   0   -0.10    0.20 
   1 -24   0    0.26    0.18 
  -1  24  -1   -0.38    0.63 
   1  24   1   -0.91    0.63 
   1  24   1    0.59    0.91 
  -1  24  -1    0.23    0.92 
  -1 -24  -1    0.12    0.22 
   1 -24   1    0.01    0.16 
   1  24   2   -0.47    0.66 
   1  24   2    0.11    0.90 
  -1  24  -2   -0.16    0.93 
  -1  24  -2   -0.12    0.62 
   1 -24   2    0.31    0.15 
   1 -24   2    0.39    0.36 
  -1 -24  -2    0.00    0.24 
   1 -24   2    0.94    0.88 
   1  24   3    1.15    0.94 
   1  24   3    0.51    0.69 
  -1  24  -3    1.07    0.64 
  -1  24  -3    1.51    0.94 
   1 -24   3    0.68    0.15 
  -1 -24  -3    0.07    0.24 
   1 -24   3    2.56    0.96 
   1 -24   3    1.26    0.38 
  -1  24  -4    0.33    0.60 
   1  24   4   -0.64    0.69 
  -1  24  -4    1.76    1.03 
   1  24   4    0.43    0.99 
   1 -24   4    0.24    0.39 
   1 -24   4    1.66    0.97 
  -1 -24  -4   -0.31    0.24 
   1  24   5    1.97    1.01 
   1  24   5    1.57    0.71 
  -1  24  -5    1.01    0.63 
   1 -24   5    1.43    0.39 
   1 -24   5    2.31    0.78 
  -1 -24  -5    1.12    0.30 
   1  24   6    2.46    1.08 
  -1  24  -6    2.11    0.71 
   1  24   6    2.50    0.57 
   1 -24   6    2.12    0.33 
  -1 -24  -6    1.34    0.33 
   1 -24   6    3.50    0.84 
   1  24   7   -0.11    1.07 
  -1  24  -7   -0.22    0.62 
   1  24   7   -0.06    0.73 
   1 -24   7    0.17    1.04 
  -1 -24  -7   -0.17    0.33 
   1 -24   7   -0.04    0.42 
   1  24   8    0.19    0.87 
   1  24   8   -0.39    0.75 
  -1  24  -8   -0.18    0.65 
  -1 -24  -8   -1.03    0.34 
   1 -24   8   -0.57    1.11 
   1 -24   8   -0.22    0.43 
  -1  24  -9   -1.28    0.62 
   1  24   9    0.71    1.20 
   1 -24   9    0.40    0.43 
  -1 -24  -9   -1.08    0.41 
   1 -24   9    0.79    0.89 
  -1  25   9   -0.26    1.19 
   1  25  -9   -0.58    0.86 
   1 -25  -9   -1.01    0.36 
  -1 -25   9   -0.84    1.16 
  -1  25   8   -1.30    1.14 
   1  25  -8   -0.53    0.70 
  -1 -25   8    0.71    1.11 
   1 -25  -8   -0.47    0.30 
   1  25  -7   -0.54    0.69 
  -1  25   7    0.40    0.77 
  -1  25   7    1.33    1.16 
  -1 -25   7    2.11    1.06 
   1 -25  -7   -0.44    0.28 
   1  25  -6    0.10    0.72 
  -1  25   6    0.64    1.09 
  -1  25   6   -0.24    0.75 
   1 -25  -6   -0.15    0.27 
  -1 -25   6    0.19    0.99 
   1  25  -5   -0.48    0.67 
   1  25  -5    0.48    1.02 
  -1  25   5   -1.23    0.73 
  -1  25   5    0.30    1.01 
   1 -25  -5   -0.49    0.27 
  -1 -25   5    0.68    0.96 
  -1  25   4    1.42    0.81 
   1  25  -4    0.86    0.75 
   1  25  -4    0.19    0.68 
  -1  25   4   -0.15    0.72 
  -1 -25   4    1.01    0.93 
   1 -25  -4    0.58    0.24 
  -1  25   3   -0.63    0.96 
   1  25  -3   -0.06    0.68 
   1  25  -3   -0.29    0.97 
  -1  25   3   -0.25    0.71 
  -1 -25   3    0.72    0.95 
   1 -25  -3   -0.12    0.24 
  -1  25   2   -0.11    0.98 
   1  25  -2    0.00    0.66 
  -1  25   2    0.11    0.70 
   1  25  -2   -0.17    0.73 
   1 -25  -2   -0.46    0.22 
   1  25  -1    0.71    0.95 
  -1  25   1   -0.57    0.67 
   1  25  -1   -0.18    0.63 
  -1  25   1   -0.34    0.96 
   1 -25  -1    0.14    0.20 
  -1  25   0    1.90    0.66 
   1  25   0    2.40    0.68 
  -1  25   0    1.42    0.95 
   1  25   0    1.95    0.97 
  -1 -25   0    1.25    0.21 
   1 -25   0    1.00    0.18 
  -1  25  -1   -0.47    0.71 
   1  25   1    0.41    0.69 
   1  25   1    0.86    0.98 
  -1  25  -1    0.23    0.67 
  -1 -25  -1    0.03    0.22 
   1 -25   1   -0.16    0.18 
   1  25   2    0.07    0.69 
  -1  25  -2    0.03    0.98 
  -1  25  -2   -0.67    0.66 
   1  25   2    0.28    0.74 
   1 -25   2    0.38    0.73 
   1 -25   2   -0.15    0.19 
  -1 -25  -2   -0.55    0.24 
  -1  25  -3    0.19    0.66 
  -1  25  -3    0.77    0.98 
   1  25   3    0.58    0.76 
   1  25   3    0.22    0.69 
   1 -25   3    0.51    0.37 
  -1 -25  -3   -0.33    0.27 
   1 -25   3    1.23    0.99 
  -1  25  -4    1.06    1.06 
  -1  25  -4    0.24    0.65 
   1  25   4    0.72    1.00 
   1  25   4   -0.49    0.54 
   1 -25   4    0.73    0.40 
  -1 -25  -4   -0.15    0.28 
   1 -25   4    1.03    1.00 
   1  25   5    0.31    1.04 
   1  25   5    0.08    0.70 
  -1  25  -5    0.47    0.68 
   1 -25   5    0.67    0.42 
   1 -25   5    0.51    1.00 
  -1 -25  -5    0.04    0.28 
   1  25   6    2.56    1.14 
   1  25   6    0.67    0.75 
  -1  25  -6    1.70    0.67 
   1 -25   6    2.34    1.08 
   1 -25   6    1.08    0.32 
  -1 -25  -6    0.56    0.30 
   1  25   7    1.38    1.15 
   1  25   7   -0.66    0.75 
  -1  25  -7   -1.03    0.75 
   1 -25   7    0.28    0.44 
   1 -25   7   -0.22    1.11 
  -1 -25  -7   -0.58    0.32 
   1  25   8    1.08    1.15 
  -1  25  -8   -0.07    0.75 
   1 -25   8    0.43    0.45 
   1 -25   8   -0.06    1.12 
  -1 -25  -8   -0.78    0.38 
  -1  26   8   -0.27    1.20 
   1  26  -8    0.51    0.82 
   1 -26  -8   -1.06    0.32 
  -1 -26   8   -0.21    1.13 
  -1  26   7    1.15    1.19 
   1  26  -7    0.01    0.74 
   1 -26  -7    0.64    0.33 
  -1 -26   7    2.48    1.08 
  -1  26   6    7.87    0.80 
   1  26  -6    7.50    0.74 
  -1  26   6    7.54    1.11 
  -1 -26   6    7.86    0.82 
   1 -26  -6    6.77    0.28 
   1  26  -5   -0.26    0.72 
   1  26  -5    0.78    1.06 
  -1  26   5   -0.34    0.82 
  -1  26   5   -0.26    0.77 
  -1 -26   5    1.01    0.80 
   1 -26  -5   -0.32    0.30 
   1  26  -4    0.12    0.80 
  -1  26   4   -1.55    1.03 
   1  26  -4   -0.26    0.73 
  -1  26   4   -0.88    0.70 
   1 -26  -4   -0.17    0.24 
  -1 -26   4    1.99    1.01 
   1  26  -3    0.36    0.72 
   1  26  -3   -0.48    0.99 
  -1  26   3    1.60    1.06 
  -1  26   3    0.47    0.59 
   1 -26  -3    0.22    0.26 
   1  26  -2    1.20    1.00 
  -1  26   2    1.43    1.03 
   1  26  -2    0.01    0.54 
  -1  26   2   -0.74    0.71 
   1 -26  -2   -0.32    0.23 
  -1  26   1   -0.88    0.71 
  -1  26   1    0.64    0.79 
   1  26  -1   -0.54    0.70 
   1  26  -1    0.01    0.99 
   1 -26  -1   -0.55    0.21 
   1  26   0   -0.05    0.73 
  -1  26   0   -0.33    0.72 
   1  26   0    0.32    0.76 
  -1  26   0    2.22    1.06 
   1 -26   0   -0.10    0.21 
   1  26   1    0.08    0.74 
  -1  26  -1   -0.01    0.70 
  -1  26  -1    1.38    1.00 
   1  26   1    0.47    0.98 
  -1 -26  -1   -0.06    0.24 
   1  26   2    7.23    1.05 
  -1  26  -2    7.38    1.05 
   1  26   2    6.56    0.77 
  -1  26  -2    6.10    0.72 
  -1 -26  -2    5.68    0.26 
  -1  26  -3    3.24    0.71 
   1  26   3    2.63    0.75 
  -1  26  -3    3.78    1.02 
   1  26   3    3.98    1.05 
  -1 -26  -3    2.39    0.27 
   1 -26   3    3.78    0.32 
   1 -26   3    4.56    1.05 
  -1  26  -4   -0.56    0.77 
   1  26   4    0.13    0.79 
   1  26   4   -0.76    0.75 
  -1  26  -4    0.46    1.05 
   1 -26   4    0.67    1.04 
   1 -26   4    0.47    0.39 
  -1 -26  -4   -0.25    0.30 
   1  26   5    0.35    1.07 
  -1  26  -5   -0.15    1.09 
   1  26   5   -0.48    0.78 
  -1  26  -5   -0.65    0.70 
   1 -26   5    1.27    1.10 
   1 -26   5    0.52    0.43 
  -1 -26  -5   -0.79    0.33 
   1  26   6    0.46    1.15 
   1  26   6    1.12    0.82 
  -1  26  -6   -0.50    0.69 
   1 -26   6   -1.04    1.07 
   1 -26   6    0.16    0.41 
  -1 -26  -6   -0.41    0.34 
   1  26   7    1.98    1.19 
  -1  26  -7   -0.68    0.78 
   1 -26   7    0.56    0.45 
  -1 -26  -7    0.07    0.35 
   1 -26   7   -0.59    1.11 
   1 -27  -7    0.07    0.33 
   1  27  -6   -0.74    0.74 
  -1  27   6   -0.01    1.11 
   1 -27  -6   -0.82    0.33 
  -1 -27   6    0.99    1.05 
  -1  27   5    3.55    1.16 
  -1  27   5    1.96    0.79 
   1  27  -5    0.73    0.76 
   1  27  -5    3.05    1.10 
  -1 -27   5    3.98    1.06 
  -1  27   4    0.43    1.12 
   1  27  -4   -0.65    0.76 
  -1  27   4    0.23    0.80 
   1  27  -4    0.33    0.84 
   1 -27  -4   -0.47    0.28 
  -1 -27   4    0.33    1.02 
  -1  27   3   -0.38    0.98 
   1  27  -3   -1.01    0.74 
   1  27  -3    0.48    1.06 
  -1  27   3   -0.35    0.79 
   1 -27  -3   -0.15    0.26 
  -1  27   2    0.45    1.05 
   1  27  -2    1.36    1.06 
   1  27  -2   -0.41    0.71 
  -1  27   2   -0.17    0.77 
   1 -27  -2   -0.24    0.24 
  -1  27   1    1.08    1.04 
  -1  27   1    1.14    0.74 
   1  27  -1    0.51    0.76 
   1  27  -1    0.85    1.02 
   1 -27  -1    0.62    0.23 
   1  27   0   -0.60    0.74 
  -1  27   0    1.78    0.83 
  -1  27   0    1.54    0.77 
   1  27   0    1.42    1.03 
   1  27   1    6.10    0.76 
   1  27   1    6.34    1.04 
  -1  27  -1    6.81    1.06 
  -1  27  -1    5.79    0.75 
   1  27   2   -0.01    0.59 
   1  27   2    1.22    1.01 
  -1  27  -2   -0.40    0.81 
  -1  27  -2    1.47    1.09 
  -1  27  -3    0.64    1.06 
   1  27   3    0.84    1.08 
   1  27   3   -1.14    0.73 
  -1  27  -3   -0.73    0.74 
   1 -27   3    1.85    1.10 
  -1 -27  -3   -0.23    0.25 
   1  27   4   -0.49    0.78 
  -1  27  -4    0.50    1.10 
   1  27   4   -1.19    1.06 
  -1  27  -4   -1.06    0.79 
   1 -27   4    0.77    1.08 
  -1 -27  -4   -0.61    0.27 
   1 -27   4    0.56    0.33 
  -1  27  -5   -0.36    0.74 
   1  27   5    0.68    0.93 
   1  27   5    0.09    1.04 
  -1  27  -5   -0.38    1.10 
  -1 -27  -5   -0.06    0.29 
   1 -27   5    0.97    0.43 
   1 -27   5    0.94    1.09 
   1  27   6   -0.54    1.33 
  -1  27  -6    0.44    0.77 
   1 -27   6    0.64    1.14 
  -1 -27  -6   -0.73    0.32 
  -1  28   5   -0.31    1.16 
   1  28  -5    0.33    0.86 
  -1 -28   5    0.79    1.06 
   1 -28  -5   -0.35    0.30 
  -1  28   4    1.44    1.01 
  -1  28   4    1.75    1.10 
   1  28  -4    2.17    1.03 
   1  28  -4   -0.52    0.78 
   1 -28  -4    0.19    0.30 
  -1  28   3   -1.22    0.77 
   1  28  -3    0.30    1.11 
   1  28  -3   -1.70    0.76 
  -1  28   3    0.48    1.14 
   1 -28  -3   -0.55    0.27 
  -1  28   2    3.67    0.80 
   1  28  -2    5.72    1.14 
   1  28  -2    3.82    0.78 
  -1  28   2    7.53    1.16 
  -1  28   1   -1.19    0.78 
   1  28  -1   -1.48    0.77 
   1  28  -1   -0.29    1.04 
  -1  28   1   -0.85    1.07 
   1  28   0    0.84    1.08 
  -1  28   0   -0.18    0.76 
   1  28   0   -0.79    0.75 
  -1  28   0    0.15    1.05 
  -1  28  -1   -1.15    0.77 
   1  28   1    0.53    1.07 
   1  28   1   -1.53    0.77 
  -1  28  -1    0.25    1.10 
   1  28   2   -0.89    1.06 
   1  28   2   -0.03    0.81 
  -1  28  -2   -0.89    0.75 
  -1  28  -2    0.27    0.83 
  -1  28  -3   -0.05    0.76 
  -1  28  -3    1.57    1.09 
   1  28   3    0.32    0.95 
   1  28   3    1.78    0.87 
  -1  28  -4   -0.38    0.87 
  -1  28  -4    0.36    1.15 
   1  28   4    0.24    1.34 
   1 -28   4    0.03    1.11 
  -1 -28  -5   -0.12    0.35 
   1  29  -2   -0.03    0.86 
  -1  29   2    1.18    1.20 
  -1  29   1   -0.60    0.83 
  -1  29   1   -0.20    1.11 
   1  29  -1   -1.14    0.85 
  -1  29   0   -0.55    0.85 
   1  29   0   -1.50    0.94 
  -1  29   0   -1.61    1.12 
  -1  29  -1    1.71    1.20 
  -1  29  -1    0.60    0.82 
  -1  29  -2    0.63    0.89 
  -2   0  17    0.79    1.09 
  -2   0  16   15.04    1.17 
  -2   0  15   -0.23    0.97 
  -2   0  14    7.92    0.96 
   2   0 -13   -0.23    0.24 
  -2   0  13   -0.29    0.11 
  -2   0  13   -0.01    0.85 
  -2   0  12    0.61    0.11 
   2   0 -12    0.91    0.22 
  -2   0  12    1.69    0.80 
   2   0 -11   -0.80    0.62 
  -2   0  11    0.40    0.70 
   2   0 -11   -0.07    0.20 
  -2   0  11   -0.23    0.10 
  -2   0  10   45.87    0.50 
   2   0 -10   47.25    0.94 
  -2   0  10   47.49    1.02 
   2   0  -9   -0.32    0.50 
   2   0  -9   -0.08    0.15 
  -2   0   9   -0.08    0.13 
  -2   0   9   -0.26    0.08 
  -2   0   9    0.11    0.42 
   2   0  -8    1.27    0.48 
   2   0  -8    1.95    0.15 
  -2   0   8    2.64    0.51 
  -2   0   8    1.77    0.13 
  -2   0   8    1.88    0.08 
  -2   0   7   -0.28    0.44 
   2   0  -7    0.35    0.45 
  -2   0   7    0.30    0.12 
   2   0  -7    0.06    0.12 
  -2   0   6   76.82    0.95 
   2   0  -6   76.27    0.95 
  -2   0   6   75.83    0.49 
   2   0  -6   76.46    0.89 
  -2   0   6   77.03    0.91 
  -2   0   5    0.02    0.07 
   2   0  -5    0.14    0.08 
   2   0  -5   -0.29    0.30 
  -2   0   5    0.15    0.33 
   2   0  -3   -0.09    0.22 
  -2   0   3    0.32    0.24 
   2   0  -3    0.24    0.06 
  -2   0   3    0.04    0.05 
   2   0  -1   -0.07    0.02 
   2   0  -1   -0.01    0.01 
  -2   0   0    0.67    0.06 
   2   0   0   -0.60    0.04 
   2   0   1   -0.07    0.03 
  -2   0  -1    0.04    0.12 
  -2   0  -1    0.09    0.04 
   2   0   1   -0.01    0.12 
   2   0   2    1.29    0.28 
  -2   0  -2    1.54    0.12 
  -2   0  -2    1.33    0.27 
   2   0   3   -0.07    0.33 
   2   0   3   -0.23    0.09 
  -2   0  -3   -0.07    0.24 
  -2   0  -3   -0.05    0.13 
   2   0   4   39.33    0.47 
   2   0   4   40.48    0.76 
  -2   0  -4   38.81    0.45 
   2   0   4   39.62    0.51 
  -2   0  -4   39.18    0.49 
   2   0   5    0.00    0.11 
   2   0   5   -0.01    0.09 
   2   0   5   -0.20    0.39 
  -2   0  -5   -0.05    0.37 
  -2   0  -6   99.03    1.16 
   2   0   6   97.59    0.92 
   2   0   6   98.05    1.19 
   2   0   6   98.92    1.34 
   2   0   7   -0.03    0.54 
  -2   0  -7   -0.26    0.49 
   2   0   7    0.09    0.12 
   2   0   7    0.09    0.14 
   2   0   8    1.04    0.12 
  -2   0  -8    0.45    0.52 
   2   0   8    1.04    0.15 
   2   0   8    1.21    0.59 
   2   0   9    0.10    0.64 
   2   0   9   -0.08    0.15 
   2   0  10   31.15    0.93 
   2   0  10   26.02    0.23 
  -2   0 -10   27.80    0.45 
  -2   0 -11   -0.34    0.38 
   2   0  11   -0.06    0.17 
   2   0  11   -0.29    0.81 
   2   0  12   14.53    1.00 
  -2   0 -12   13.48    0.52 
   2   0  13   -0.31    0.20 
   2   0  13   -0.01    0.94 
   2   0  14    2.33    1.06 
   2   0  15    0.39    1.10 
   2   0  16    0.84    1.17 
  -2   1  17    1.20    1.17 
  -2  -1  17    0.84    1.15 
  -2   1  16    0.62    1.06 
  -2  -1  16   -0.20    1.06 
  -2   1  15    1.96    0.94 
   2  -1 -15    1.32    0.28 
  -2  -1  15    2.51    1.04 
  -2   1  14    1.27    0.91 
   2  -1 -14    1.18    0.27 
  -2  -1  14    1.34    0.92 
  -2   1  13    1.95    0.88 
   2   1 -13    0.74    0.23 
  -2  -1  13    2.01    0.87 
   2  -1 -13    0.63    0.25 
   2   1 -12   12.05    0.25 
  -2   1  12   11.74    0.12 
  -2   1  12   16.59    0.92 
  -2  -1  12   11.88    0.14 
   2  -1 -12   11.92    0.25 
  -2  -1  12   15.45    0.89 
  -2   1  11    6.23    0.10 
  -2   1  11    8.13    0.73 
   2   1 -11    6.63    0.67 
   2   1 -11    6.18    0.19 
   2  -1 -11    6.96    0.70 
   2  -1 -11    6.13    0.20 
  -2  -1  11    6.25    0.12 
  -2  -1  11    8.28    0.76 
  -2   1  10    8.99    0.17 
  -2   1  10    9.49    0.10 
  -2   1  10   11.55    0.69 
   2   1 -10   11.10    0.66 
   2   1 -10    9.13    0.18 
   2  -1 -10   10.42    0.63 
  -2  -1  10   11.22    0.68 
   2  -1 -10    9.16    0.18 
  -2  -1  10    9.31    0.11 
  -2  -1  10    9.08    0.16 
  -2   1   9    2.07    0.57 
  -2   1   9    1.14    0.14 
   2   1  -9    0.66    0.51 
  -2   1   9    1.23    0.07 
   2   1  -9    1.18    0.15 
   2  -1  -9    1.21    0.15 
   2  -1  -9    1.61    0.42 
  -2  -1   9    1.49    0.43 
  -2  -1   9    1.12    0.09 
  -2  -1   9    0.99    0.13 
  -2   1   8   43.23    0.89 
  -2   1   8   41.73    0.39 
  -2   1   8   43.36    0.98 
   2   1  -8   41.17    0.99 
   2   1  -8   40.58    0.69 
  -2  -1   8   41.48    0.48 
   2  -1  -8   41.42    0.85 
   2  -1  -8   40.96    1.00 
  -2  -1   8   41.32    0.88 
  -2  -1   8   42.28    0.94 
   2   1  -7    0.55    0.45 
  -2   1   7    0.69    0.06 
  -2   1   7    1.54    0.38 
  -2   1   7    0.66    0.10 
   2   1  -7    0.93    0.14 
   2  -1  -7    0.72    0.13 
  -2  -1   7    0.81    0.12 
  -2  -1   7    1.52    0.49 
   2  -1  -7    1.06    0.43 
  -2   1   6  211.94    2.26 
  -2   1   6  213.29    2.35 
   2   1  -6  213.30    2.23 
   2   1  -6  212.41    1.81 
  -2   1   6  209.26    1.71 
   2   1  -6  210.85    2.27 
   2  -1  -6  211.05    2.32 
  -2  -1   6  213.30    2.36 
  -2  -1   6  208.40    1.80 
  -2  -1   6  214.32    2.32 
   2  -1  -6  211.99    2.20 
   2   1  -5    1.79    0.08 
   2   1  -5    1.78    0.04 
   2   1  -5    2.13    0.34 
  -2   1   5    1.82    0.09 
  -2   1   5    2.07    0.33 
   2  -1  -5    2.18    0.33 
   2  -1  -5    1.70    0.09 
  -2  -1   5    2.08    0.34 
  -2  -1   5    1.83    0.05 
  -2  -1   5    1.66    0.08 
  -2   1   4  210.52    2.07 
   2   1  -4  213.25    2.12 
   2   1  -4  211.16    2.07 
   2   1  -4  210.42    1.74 
  -2   1   4  216.46    2.19 
  -2  -1   4  214.43    2.11 
  -2  -1   4  213.37    2.13 
   2  -1  -4  214.40    2.19 
   2  -1  -4  212.89    2.10 
   2   1  -3  105.33    0.81 
  -2   1   3  103.70    0.82 
   2   1  -3  102.47    0.80 
   2   1  -3  101.96    0.58 
  -2   1   3  103.13    0.77 
   2  -1  -3  103.82    0.83 
  -2  -1   3  103.97    0.77 
   2  -1  -3  103.25    0.77 
  -2  -1   3  104.39    0.80 
   2   1  -1    7.48    0.02 
   2  -1  -1    7.45    0.03 
  -2  -1   1    7.46    0.02 
  -2   1  -1  285.56    2.93 
  -2   1  -1  281.13    2.86 
  -2  -1  -1  285.59    2.91 
  -2  -1  -1  286.06    2.86 
   2   1   2   14.47    0.30 
   2   1   2   12.98    0.31 
  -2   1  -2   12.83    0.33 
  -2  -1  -2   14.11    0.30 
  -2  -1  -2   12.83    0.28 
   2  -1   2   12.46    0.33 
  -2   1  -3  498.44    8.07 
  -2   1  -3  500.97    8.03 
   2   1   3  498.33    8.26 
   2   1   3  500.28    8.12 
  -2  -1  -3  498.38    8.05 
   2  -1   3  499.24    8.08 
   2  -1   3  501.58    8.07 
  -2  -1  -3  501.66    7.97 
   2   1   4  253.55    2.89 
  -2   1  -4  255.12    2.70 
  -2   1  -4  256.49    2.64 
   2   1   4  254.46    2.74 
   2   1   4  251.97    2.54 
   2  -1   4  255.73    2.63 
  -2  -1  -4  254.17    2.72 
   2  -1   4  254.25    2.76 
  -2  -1  -4  254.75    2.58 
   2  -1   4  257.00    2.93 
   2   1   5   18.74    0.53 
  -2   1  -5   18.90    0.46 
   2   1   5   19.35    0.43 
  -2  -1  -5   19.20    0.50 
   2  -1   5   19.54    0.50 
   2  -1   5   18.86    0.44 
  -2  -1  -5   18.48    0.50 
   2   1   6   51.29    0.69 
   2   1   6   49.24    0.74 
  -2   1  -6   50.29    0.85 
   2   1   6   50.80    1.06 
   2  -1   6   49.72    0.89 
   2  -1   6   51.58    1.05 
  -2  -1  -6   50.21    0.74 
   2  -1   6   50.40    0.66 
  -2  -1  -6   50.02    0.81 
   2   1   7   12.86    0.16 
  -2   1  -7   13.79    0.54 
   2   1   7   13.01    0.14 
   2   1   7   14.99    0.60 
  -2  -1  -7   13.84    0.55 
   2  -1   7   13.15    0.15 
  -2  -1  -7   12.64    0.29 
   2  -1   7   12.81    0.12 
   2  -1   7   14.85    0.62 
  -2   1  -8   16.53    0.58 
   2   1   8   15.72    0.14 
   2   1   8   15.25    0.16 
   2   1   8   17.57    0.64 
  -2  -1  -8   15.97    0.32 
   2  -1   8   15.61    0.15 
   2  -1   8   15.53    0.17 
  -2  -1  -8   16.21    0.58 
   2  -1   8   17.56    0.66 
   2   1   9    2.90    0.63 
   2   1   9    2.16    0.15 
  -2  -1  -9    2.03    0.29 
   2  -1   9    3.34    0.53 
   2  -1   9    2.11    0.14 
   2  -1   9    2.01    0.16 
   2   1  10    5.35    0.17 
   2   1  10    8.10    0.66 
  -2  -1 -10    6.38    0.42 
   2  -1  10    9.60    0.84 
   2  -1  10    5.54    0.18 
   2   1  11    0.43    0.81 
   2   1  11   -0.22    0.17 
  -2  -1 -11   -0.83    0.41 
   2  -1  11    1.29    0.84 
   2  -1  11   -0.20    0.17 
  -2   1 -12    6.93    0.42 
   2   1  12    7.33    0.89 
   2   1  12    6.67    0.19 
   2  -1  12    8.74    0.92 
   2  -1  12    6.55    0.20 
  -2  -1 -12    6.18    0.49 
   2   1  13    2.81    0.95 
   2   1  13    1.82    0.21 
   2  -1  13    1.52    0.21 
   2  -1  13    1.95    0.94 
   2   1  14    1.27    0.98 
   2  -1  14    1.73    1.05 
   2   1  15    0.73    0.85 
   2  -1  15    0.86    1.12 
   2   1  16    4.75    1.16 
   2  -1  16    6.04    1.23 
  -2   2  17    1.35    1.07 
  -2  -2  17    1.72    1.07 
  -2   2  16    7.35    1.11 
  -2  -2  16    6.44    0.85 
  -2   2  15    2.33    1.02 
  -2  -2  15    1.95    1.00 
   2  -2 -15    1.09    0.30 
  -2   2  14    3.11    0.92 
  -2  -2  14    2.44    0.94 
  -2   2  13    0.69    0.10 
  -2   2  13    1.75    0.87 
  -2  -2  13    1.08    0.15 
  -2  -2  13    0.46    0.86 
   2  -2 -13    0.82    0.27 
  -2   2  12   32.73    0.81 
  -2   2  12   28.20    0.14 
   2   2 -12   27.80    0.27 
   2  -2 -12   27.83    0.30 
  -2  -2  12   28.45    0.19 
  -2  -2  12   33.60    0.97 
  -2   2  11    0.90    0.09 
   2   2 -11    0.90    0.18 
  -2   2  11    0.61    0.68 
   2   2 -11    0.61    0.64 
  -2  -2  11    1.27    0.54 
   2  -2 -11   -0.21    0.63 
   2  -2 -11    1.04    0.21 
  -2  -2  11    0.82    0.12 
   2   2 -10    0.83    0.16 
  -2   2  10    0.68    0.07 
   2   2 -10    1.02    0.46 
  -2   2  10    1.29    0.49 
   2  -2 -10    0.70    0.19 
  -2  -2  10    0.81    0.63 
  -2  -2  10    0.74    0.11 
  -2  -2  10    0.33    0.15 
   2  -2 -10    0.86    0.58 
   2   2  -9    0.22    0.14 
   2   2  -9   -0.70    0.51 
  -2   2   9    0.36    0.07 
  -2   2   9    0.05    0.54 
  -2   2   9    0.15    0.14 
   2  -2  -9    0.30    0.17 
   2  -2  -9   -0.38    0.38 
  -2  -2   9    0.11    0.13 
  -2  -2   9    0.09    0.10 
  -2  -2   9    0.51    0.54 
  -2   2   8    0.64    0.14 
   2   2  -8    0.56    0.13 
   2   2  -8    0.54    0.07 
   2   2  -8    0.36    0.48 
  -2   2   8    0.73    0.52 
  -2   2   8    0.48    0.06 
   2  -2  -8    0.51    0.14 
  -2  -2   8    0.47    0.10 
  -2  -2   8    1.21    0.54 
   2  -2  -8    1.04    0.49 
  -2  -2   8    0.56    0.12 
   2   2  -7    5.84    0.13 
   2   2  -7    6.40    0.46 
  -2   2   7    5.83    0.48 
  -2   2   7    5.69    0.12 
  -2   2   7    5.59    0.06 
   2   2  -7    5.67    0.07 
   2  -2  -7    6.45    0.46 
   2  -2  -7    5.79    0.14 
  -2  -2   7    5.80    0.10 
  -2  -2   7    5.46    0.47 
  -2  -2   7    5.55    0.13 
   2   2  -6   16.53    0.08 
  -2   2   6   16.31    0.13 
  -2   2   6   18.59    0.39 
   2   2  -6   18.51    0.45 
   2   2  -6   16.29    0.12 
   2  -2  -6   18.39    0.44 
   2  -2  -6   16.35    0.13 
  -2  -2   6   18.51    0.47 
  -2  -2   6   16.24    0.11 
  -2  -2   6   16.59    0.10 
   2   2  -5   38.95    0.47 
   2   2  -5   39.58    0.61 
  -2   2   5   39.43    0.60 
   2   2  -5   38.56    0.31 
  -2   2   5   38.87    0.26 
  -2   2   5   39.08    0.56 
   2  -2  -5   38.74    0.54 
  -2  -2   5   38.67    0.57 
  -2  -2   5   38.40    0.57 
  -2  -2   5   39.70    0.37 
   2  -2  -5   38.76    0.53 
   2   2  -4   69.73    0.78 
  -2   2   4   69.78    0.50 
   2   2  -4   68.87    0.79 
  -2   2   4   68.46    0.79 
   2   2  -4   67.75    0.54 
  -2   2   4   71.48    0.85 
  -2  -2   4   69.96    0.73 
   2  -2  -4   69.24    0.78 
  -2  -2   4   69.58    0.59 
   2  -2  -4   69.84    0.86 
  -2  -2   4   69.97    0.80 
  -2   2   3   13.64    0.42 
   2   2  -3   12.60    0.36 
  -2   2   3   12.54    0.37 
   2   2  -3   14.40    0.35 
   2   2  -3   12.15    0.27 
  -2   2   3   14.77    0.26 
   2  -2  -3   12.68    0.37 
  -2  -2   3   13.10    0.30 
   2  -2  -3   13.10    0.23 
   2  -2  -3   14.06    0.48 
  -2  -2   3   13.35    0.42 
   2   2  -2    0.17    0.02 
   2   2  -2    0.37    0.13 
  -2   2   2    0.28    0.19 
  -2   2   2    0.24    0.05 
  -2   2   2    0.55    0.06 
   2  -2  -2    0.27    0.04 
  -2  -2   2    0.22    0.03 
  -2  -2   2    0.08    0.09 
   2  -2  -2    0.30    0.14 
   2  -2  -2    0.32    0.04 
  -2   2   0    9.10    0.13 
  -2   2   0    8.37    0.05 
  -2  -2   0    8.69    0.09 
   2  -2   0    8.01    0.08 
  -2   2  -1   52.97    0.44 
   2   2   1   49.31    0.38 
  -2   2  -1   52.21    0.45 
   2  -2   1   50.18    0.45 
  -2  -2  -1   52.00    0.39 
  -2  -2  -1   53.14    0.41 
   2  -2   1   50.40    0.42 
   2   2   2   47.00    0.49 
   2   2   2   48.52    0.80 
  -2   2  -2   46.66    0.57 
   2   2   2   45.30    0.54 
  -2   2  -2   45.15    0.47 
  -2  -2  -2   46.79    0.47 
   2  -2   2   45.85    0.59 
   2  -2   2   45.58    0.50 
  -2  -2  -2   44.46    0.52 
   2   2   3    5.76    0.20 
   2   2   3    5.67    0.34 
  -2   2  -3    5.40    0.34 
  -2  -2  -3    5.79    0.19 
  -2  -2  -3    5.80    0.31 
   2  -2   3    5.55    0.37 
  -2   2  -4   48.34    0.51 
  -2   2  -4   47.62    0.48 
   2   2   4   48.56    0.59 
  -2  -2  -4   48.12    0.46 
   2  -2   4   48.24    0.61 
   2  -2   4   47.68    0.50 
  -2  -2  -4   47.84    0.55 
   2   2   5    0.97    0.42 
  -2   2  -5    0.95    0.40 
   2   2   5    0.32    0.12 
  -2   2  -5    0.46    0.10 
  -2  -2  -5    1.12    0.39 
   2  -2   5    0.75    0.43 
   2  -2   5    0.41    0.11 
  -2  -2  -5    0.77    0.20 
   2  -2   5    0.48    0.11 
   2   2   6   28.95    0.60 
  -2   2  -6   29.68    0.52 
   2  -2   6   29.02    0.52 
  -2  -2  -6   29.66    0.57 
   2   2   7   18.78    0.66 
   2   2   7   15.28    0.17 
   2   2   7   14.48    0.18 
   2  -2   7   14.79    0.18 
   2  -2   7   15.28    0.17 
  -2  -2  -7   16.08    0.35 
   2   2   8   12.26    0.16 
   2   2   8   15.35    0.58 
   2   2   8   11.63    0.14 
  -2   2  -8   14.93    0.55 
  -2  -2  -8   13.37    0.36 
   2  -2   8   12.51    0.16 
  -2  -2  -8   14.32    0.52 
   2  -2   8   12.00    0.17 
   2  -2   8   15.64    0.60 
   2   2   9   15.33    0.19 
   2  -2   9   14.67    0.20 
   2  -2   9   19.85    0.81 
  -2  -2  -9   16.17    0.41 
   2  -2   9   15.35    0.21 
   2   2  10    1.08    0.54 
   2   2  10    1.16    0.16 
   2  -2  10    1.31    0.17 
  -2  -2 -10    0.90    0.34 
   2  -2  10    2.55    0.61 
   2   2  11   -0.09    0.17 
   2   2  11    0.76    0.81 
   2  -2  11    0.18    0.18 
   2  -2  11    0.34    0.81 
  -2  -2 -11   -0.72    0.42 
   2   2  12    0.22    0.85 
   2   2  12    0.04    0.18 
   2  -2  12   -0.23    0.19 
   2  -2  12    0.46    0.89 
   2   2  13    2.57    0.79 
   2   2  13    0.28    0.21 
   2  -2  13   -0.02    0.22 
   2  -2  13    0.10    0.71 
   2   2  14    1.26    1.06 
   2  -2  14    0.61    0.98 
   2   2  15    2.83    1.13 
   2  -2  15    2.85    1.10 
   2   2  16    0.21    1.11 
   2  -2  16    0.65    1.17 
  -2   3  17    0.45    1.16 
  -2  -3  17   -0.55    1.14 
  -2   3  16    0.74    1.08 
  -2  -3  16   -0.11    1.05 
   2  -3 -16   -0.03    0.34 
  -2   3  15    0.89    1.01 
   2  -3 -15   -0.16    0.32 
  -2  -3  15    0.79    0.99 
  -2   3  14    0.11    0.91 
  -2  -3  14   -0.02    0.91 
   2  -3 -14   -0.09    0.27 
  -2   3  13   -0.14    0.10 
  -2   3  13    0.69    0.86 
   2  -3 -13   -0.31    0.27 
  -2  -3  13   -0.02    0.87 
  -2  -3  13    0.05    0.16 
  -2   3  12    8.49    0.64 
  -2   3  12    7.60    0.10 
   2  -3 -12    7.35    0.26 
  -2  -3  12    7.37    0.16 
  -2  -3  12    9.56    0.83 
  -2   3  11    3.56    0.75 
   2   3 -11    2.03    0.19 
   2   3 -11    1.51    0.66 
  -2   3  11    1.84    0.09 
  -2  -3  11    3.52    0.77 
  -2  -3  11    1.68    0.14 
   2  -3 -11    1.65    0.23 
  -2  -3  11    1.79    0.18 
   2   3 -10   10.43    0.63 
  -2   3  10   10.96    0.68 
   2   3 -10    9.63    0.17 
  -2   3  10    9.81    0.09 
   2  -3 -10   10.49    0.61 
  -2  -3  10    9.65    0.15 
   2  -3 -10    9.62    0.21 
  -2  -3  10    9.69    0.13 
  -2  -3  10   11.58    0.57 
   2   3  -9    0.33    0.54 
  -2   3   9    0.39    0.07 
  -2   3   9    0.24    0.14 
  -2   3   9    1.10    0.59 
   2   3  -9    0.45    0.08 
   2   3  -9    0.29    0.13 
  -2  -3   9    0.25    0.13 
  -2  -3   9    0.41    0.56 
   2  -3  -9    0.45    0.13 
   2  -3  -9    0.01    0.52 
  -2  -3   9    0.10    0.11 
  -2   3   8    2.28    0.54 
  -2   3   8    1.90    0.06 
   2   3  -8    0.96    0.46 
   2   3  -8    1.94    0.14 
   2   3  -8    1.70    0.08 
  -2   3   8    1.83    0.13 
  -2  -3   8    1.65    0.13 
   2  -3  -8    1.77    0.37 
  -2  -3   8    1.36    0.40 
   2  -3  -8    1.93    0.15 
  -2  -3   8    1.65    0.11 
   2   3  -7   33.95    0.74 
  -2   3   7   33.06    0.74 
   2   3  -7   33.82    0.82 
  -2   3   7   32.86    0.83 
   2   3  -7   32.01    0.39 
  -2  -3   7   32.43    0.82 
  -2  -3   7   32.12    0.52 
   2  -3  -7   32.09    0.71 
  -2  -3   7   32.09    0.71 
   2   3  -6   19.83    0.67 
   2   3  -6   18.19    0.34 
  -2   3   6   18.07    0.48 
   2   3  -6   18.31    0.53 
  -2   3   6   18.29    0.30 
  -2  -3   6   18.31    0.43 
  -2  -3   6   18.18    0.55 
   2  -3  -6   17.73    0.52 
   2   3  -5   25.75    0.48 
  -2   3   5   25.25    0.28 
   2   3  -5   25.62    0.46 
  -2   3   5   24.55    0.45 
   2   3  -5   24.96    0.32 
   2  -3  -5   24.56    0.44 
  -2  -3   5   25.32    0.47 
  -2  -3   5   25.10    0.39 
   2   3  -4   71.80    0.71 
  -2   3   4   72.62    0.75 
  -2   3   4   72.02    0.52 
   2   3  -4   72.38    0.66 
  -2   3   4   71.97    0.71 
   2   3  -4   71.18    0.54 
  -2  -3   4   72.52    0.71 
   2  -3  -4   72.67    0.80 
  -2  -3   4   71.70    0.65 
  -2  -3   4   72.20    0.59 
   2  -3  -4   70.86    0.68 
  -2   3   3   15.04    0.43 
   2   3  -3   15.83    0.34 
  -2   3   3   16.70    0.33 
   2   3  -3   14.80    0.34 
   2   3  -3   14.67    0.39 
  -2   3   3   14.52    0.39 
   2  -3  -3   13.97    0.34 
   2  -3  -3   14.72    0.31 
  -2  -3   3   15.31    0.38 
  -2  -3   3   15.32    0.28 
  -2   3   2   48.42    0.51 
   2   3  -2   46.69    0.45 
   2   3  -2   47.69    0.42 
  -2   3   2   48.92    0.46 
  -2   3   2   47.04    0.45 
   2   3  -2   45.73    0.27 
   2  -3  -2   48.70    0.43 
  -2  -3   2   47.50    0.41 
  -2  -3   2   47.46    0.27 
   2  -3  -2   47.76    0.52 
   2  -3  -2   45.93    0.43 
  -2   3   1    0.59    0.15 
   2   3  -1    0.50    0.12 
   2   3  -1    0.68    0.14 
  -2   3   1    0.69    0.08 
  -2   3   1    0.54    0.17 
   2  -3  -1    0.70    0.06 
   2  -3  -1    0.47    0.04 
   2  -3  -1    0.39    0.12 
  -2  -3   1    0.42    0.07 
   2  -3  -1    0.69    0.12 
  -2  -3   1    0.68    0.14 
   2   3   0    1.93    0.11 
   2   3   0    2.06    0.14 
  -2   3   0    2.15    0.06 
  -2   3   0    2.24    0.11 
  -2   3   0    2.84    0.18 
  -2  -3   0    2.41    0.17 
  -2  -3   0    2.33    0.10 
   2  -3   0    1.78    0.08 
   2  -3   0    2.24    0.17 
   2  -3   0    2.10    0.08 
  -2   3  -1   28.93    0.25 
   2   3   1   27.57    0.35 
   2   3   1   28.95    0.37 
  -2   3  -1   29.23    0.44 
  -2   3  -1   28.48    0.39 
   2   3   1   28.08    0.52 
   2  -3   1   29.77    0.45 
   2  -3   1   28.84    0.39 
  -2  -3  -1   28.27    0.35 
  -2  -3  -1   28.94    0.37 
   2   3   2   33.64    0.69 
  -2   3  -2   31.59    0.23 
  -2   3  -2   32.15    0.45 
   2   3   2   30.96    0.44 
  -2   3  -2   32.51    0.47 
   2   3   2   33.08    0.44 
  -2  -3  -2   33.00    0.41 
   2  -3   2   31.60    0.40 
   2  -3   2   31.85    0.48 
  -2  -3  -2   32.34    0.43 
   2   3   3   89.47    0.78 
  -2   3  -3   89.34    0.84 
  -2   3  -3   89.67    0.59 
   2   3   3   90.37    0.79 
   2   3   3   89.04    1.03 
  -2   3  -3   89.38    0.78 
   2  -3   3   88.40    0.81 
  -2  -3  -3   87.80    0.96 
   2  -3   3   87.98    0.79 
  -2  -3  -3   90.14    0.84 
  -2  -3  -3   88.51    0.74 
  -2   3  -4  146.12    1.22 
   2   3   4  146.50    1.35 
   2   3   4  146.66    1.26 
  -2   3  -4  145.84    1.35 
   2   3   4  144.90    1.49 
  -2  -3  -4  148.03    1.64 
   2  -3   4  147.25    1.40 
   2  -3   4  145.07    1.23 
  -2  -3  -4  145.50    1.28 
  -2  -3  -4  145.65    1.31 
  -2   3  -5    1.35    0.10 
  -2   3  -5    1.28    0.30 
   2   3   5    1.29    0.12 
   2   3   5    1.29    0.41 
  -2  -3  -5    1.37    0.11 
  -2  -3  -5    1.62    0.23 
  -2  -3  -5    1.59    0.30 
   2  -3   5    1.16    0.11 
   2  -3   5    1.35    0.45 
  -2   3  -6    1.36    0.44 
  -2   3  -6    1.82    0.11 
   2   3   6    2.05    0.37 
   2   3   6    2.17    0.16 
  -2  -3  -6    2.08    0.44 
   2  -3   6    1.83    0.13 
  -2  -3  -6    3.38    0.21 
   2  -3   6    1.20    0.51 
   2  -3   6    2.35    0.15 
  -2   3  -7    0.30    0.12 
   2   3   7    1.84    0.57 
   2   3   7    0.35    0.12 
  -2   3  -7    1.26    0.52 
   2  -3   7    0.50    0.14 
  -2  -3  -7    0.46    0.15 
  -2  -3  -7    1.55    0.41 
   2  -3   7    1.39    0.47 
  -2  -3  -7    0.29    0.33 
   2  -3   7    0.44    0.15 
   2   3   8    2.45    0.57 
  -2   3  -8    2.46    0.12 
   2   3   8    2.30    0.16 
   2   3   8    2.54    0.13 
  -2   3  -8    2.90    0.56 
   2  -3   8    2.54    0.48 
   2  -3   8    2.56    0.15 
   2  -3   8    2.55    0.15 
  -2  -3  -8    2.61    0.42 
  -2  -3  -8    2.39    0.33 
  -2  -3  -8    2.35    0.19 
   2   3   9   16.20    0.16 
   2   3   9   17.82    0.58 
   2  -3   9   17.88    0.60 
   2  -3   9   15.98    0.18 
  -2  -3  -9   17.18    0.37 
   2  -3   9   16.34    0.18 
   2   3  10    0.96    0.72 
   2   3  10    0.17    0.14 
   2  -3  10   -0.19    0.17 
   2  -3  10    0.56    0.76 
  -2  -3 -10   -0.44    0.35 
   2   3  11    0.55    0.16 
   2   3  11    1.80    0.83 
  -2  -3 -11   -0.22    0.45 
   2  -3  11    1.09    0.82 
   2  -3  11    0.24    0.17 
   2   3  12    0.41    0.84 
   2   3  12    0.42    0.18 
   2  -3  12    0.90    0.91 
   2  -3  12   -0.02    0.21 
   2   3  13    0.31    0.19 
   2   3  13    0.39    0.94 
   2  -3  13    0.83    0.90 
   2  -3  13    0.20    0.23 
   2   3  14    2.02    1.01 
   2  -3  14    2.62    1.05 
   2   3  15    0.03    0.84 
   2  -3  15    0.03    1.12 
   2   3  16    1.60    1.19 
   2  -3  16    1.12    1.17 
  -2   4  17    3.57    1.16 
  -2  -4  17    4.56    1.04 
  -2   4  16    0.61    1.08 
   2  -4 -16   -0.16    0.36 
  -2  -4  16    1.45    1.10 
  -2   4  15    0.95    0.99 
   2  -4 -15    0.14    0.32 
  -2  -4  15    0.29    1.00 
  -2   4  14    1.07    0.95 
  -2  -4  14    0.93    0.73 
   2  -4 -14    0.17    0.24 
  -2   4  13   -0.04    0.81 
  -2   4  13    0.56    0.10 
  -2  -4  13    0.74    0.18 
  -2  -4  13    1.61    0.90 
   2  -4 -13    0.59    0.29 
  -2   4  12    4.16    0.11 
  -2   4  12    4.47    0.64 
  -2  -4  12    3.76    0.17 
   2  -4 -12    3.39    0.26 
  -2  -4  12    5.18    0.82 
   2   4 -11   -0.57    0.65 
  -2   4  11   -0.22    0.70 
  -2   4  11    0.02    0.09 
  -2  -4  11    0.11    0.16 
  -2  -4  11   -0.02    0.16 
  -2  -4  11    0.52    0.73 
   2  -4 -11   -0.05    0.23 
   2   4 -10   10.53    0.69 
  -2   4  10    8.08    0.10 
   2   4 -10    8.18    0.12 
  -2   4  10   10.76    0.74 
  -2  -4  10    7.90    0.16 
   2  -4 -10    7.58    0.22 
   2  -4 -10    9.79    0.69 
  -2  -4  10    7.49    0.16 
  -2  -4  10    9.60    0.71 
  -2   4   9   17.99    0.58 
   2   4  -9   15.24    0.18 
  -2   4   9   14.89    0.18 
   2   4  -9   15.53    0.13 
   2   4  -9   18.19    0.66 
   2  -4  -9   15.05    0.17 
  -2  -4   9   15.24    0.16 
  -2  -4   9   18.59    0.69 
   2  -4  -9   18.76    0.67 
  -2  -4   9   14.68    0.16 
  -2   4   8    6.38    0.55 
   2   4  -8    6.10    0.52 
   2   4  -8    5.48    0.09 
  -2   4   8    5.39    0.11 
   2   4  -8    5.38    0.15 
  -2  -4   8    6.23    0.56 
  -2  -4   8    5.43    0.13 
  -2  -4   8    5.15    0.13 
   2  -4  -8    5.55    0.17 
   2  -4  -8    6.79    0.43 
   2   4  -7   43.40    0.92 
   2   4  -7   44.14    0.49 
  -2   4   7   45.51    0.89 
  -2   4   7   45.23    0.47 
  -2   4   7   44.50    0.80 
   2   4  -7   44.18    0.66 
  -2  -4   7   43.78    0.59 
   2  -4  -7   44.21    0.65 
  -2  -4   7   44.17    0.77 
  -2  -4   7   43.55    0.80 
   2  -4  -7   44.49    0.98 
  -2   4   6    3.90    0.08 
   2   4  -6    3.76    0.10 
  -2   4   6    4.64    0.44 
   2   4  -6    4.34    0.40 
   2   4  -6    3.92    0.09 
  -2   4   6    3.70    0.08 
   2  -4  -6    3.83    0.12 
   2  -4  -6    4.10    0.41 
  -2  -4   6    4.10    0.12 
  -2  -4   6    3.91    0.42 
  -2  -4   6    3.73    0.09 
  -2   4   5   81.17    0.63 
  -2   4   5   81.18    0.79 
   2   4  -5   79.50    0.63 
   2   4  -5   80.56    0.81 
   2   4  -5   80.57    0.84 
  -2   4   5   82.03    0.84 
  -2  -4   5   80.11    0.77 
   2  -4  -5   79.97    0.94 
  -2  -4   5   80.81    0.72 
  -2  -4   5   79.31    0.78 
   2  -4  -5   80.72    0.77 
   2   4  -4   38.26    0.46 
  -2   4   4   37.93    0.38 
   2   4  -4   38.29    0.39 
   2   4  -4   37.60    0.49 
  -2   4   4   38.41    0.52 
  -2   4   4   38.41    0.53 
  -2  -4   4   38.02    0.45 
  -2  -4   4   37.85    0.48 
  -2  -4   4   38.31    0.41 
   2  -4  -4   38.09    0.58 
   2  -4  -4   37.80    0.40 
  -2   4   3  328.13    4.08 
   2   4  -3  327.80    4.01 
  -2   4   3  325.32    3.99 
  -2   4   3  325.08    3.86 
   2   4  -3  324.38    3.85 
   2   4  -3  327.16    3.82 
   2   4  -3  328.77    4.11 
   2  -4  -3  327.93    3.90 
  -2  -4   3  324.81    3.95 
   2  -4  -3  327.93    4.11 
   2  -4  -3  322.19    3.93 
  -2  -4   3  325.89    3.93 
   2  -4  -3  328.95    4.11 
   2   4  -2   17.68    0.20 
   2   4  -2   18.98    0.29 
  -2   4   2   18.96    0.27 
  -2  -4   2   19.14    0.29 
   2  -4  -2   18.30    0.26 
   2  -4  -2   19.26    0.31 
  -2   4   1   32.40    0.33 
   2   4  -1   32.92    0.35 
  -2   4   1   32.48    0.34 
  -2   4   1   31.33    0.25 
   2   4  -1   32.64    0.25 
  -2   4   1   34.91    0.44 
   2   4  -1   33.07    0.33 
  -2  -4   1   32.45    0.32 
   2  -4  -1   32.75    0.35 
   2  -4  -1   32.54    0.38 
   2  -4  -1   31.12    0.23 
  -2  -4   1   32.45    0.31 
   2  -4  -1   32.69    0.36 
   2   4   0  113.68    0.89 
  -2   4   0  114.29    0.88 
   2   4   0  113.91    0.92 
   2   4   0  113.38    0.82 
  -2   4   0  114.17    0.88 
  -2   4   0  114.91    0.97 
   2   4   0  113.60    0.87 
   2  -4   0  115.13    0.89 
  -2  -4   0  115.96    0.94 
   2  -4   0  115.20    0.96 
   2  -4   0  113.24    0.81 
  -2  -4   0  114.29    0.85 
   2  -4   0  114.07    0.89 
  -2   4  -1   16.89    0.10 
   2   4   1   17.25    0.26 
  -2   4  -1   17.62    0.14 
  -2   4  -1   17.58    0.29 
   2   4   1   17.09    0.11 
   2   4   1   17.70    0.21 
   2  -4   1   17.37    0.14 
  -2  -4  -1   17.46    0.25 
  -2  -4  -1   16.78    0.11 
   2  -4   1   17.27    0.13 
   2  -4   1   17.20    0.23 
  -2  -4  -1   17.56    0.18 
  -2   4  -2  140.33    1.27 
   2   4   2  142.30    1.27 
   2   4   2  141.25    1.43 
  -2   4  -2  139.77    1.03 
   2   4   2  141.12    1.28 
  -2   4  -2  140.81    1.23 
  -2  -4  -2  143.75    1.29 
   2  -4   2  140.60    1.03 
  -2  -4  -2  139.34    1.51 
  -2  -4  -2  140.64    1.22 
   2  -4   2  141.32    1.31 
   2  -4   2  142.23    1.27 
   2   4   3    2.80    0.21 
   2   4   3    3.68    0.30 
  -2   4  -3    2.83    0.12 
  -2   4  -3    3.93    0.37 
  -2  -4  -3    3.37    0.33 
   2  -4   3    2.24    0.12 
  -2  -4  -3    3.00    0.20 
   2  -4   3    3.49    0.38 
   2   4   4   28.95    0.50 
  -2   4  -4   27.93    0.33 
  -2   4  -4   28.19    0.49 
  -2   4  -4   28.18    0.36 
   2   4   4   27.86    0.44 
  -2  -4  -4   26.51    0.29 
   2  -4   4   27.37    0.50 
  -2  -4  -4   28.06    0.46 
   2   4   5   20.52    0.56 
  -2   4  -5   20.41    0.55 
  -2   4  -5   20.47    0.47 
  -2  -4  -5   20.96    0.48 
  -2  -4  -5   19.42    0.35 
   2  -4   5   20.89    0.59 
   2   4   6    6.54    0.45 
  -2   4  -6    6.14    0.53 
   2  -4   6    6.04    0.46 
  -2  -4  -6    6.37    0.50 
  -2   4  -7    6.38    0.13 
   2   4   7    7.12    0.57 
   2   4   7    6.69    0.17 
  -2   4  -7    7.67    0.56 
   2  -4   7    6.51    0.45 
  -2  -4  -7    7.47    0.33 
   2  -4   7    6.42    0.16 
  -2  -4  -7    7.02    0.41 
  -2  -4  -7    6.33    0.20 
   2  -4   7    6.34    0.15 
   2   4   8   27.99    0.76 
  -2   4  -8   27.89    0.54 
  -2   4  -8   28.47    0.74 
  -2  -4  -8   25.58    0.43 
  -2  -4  -8   27.09    0.71 
   2  -4   8   27.82    0.79 
   2   4   9    1.12    0.12 
   2   4   9    0.83    0.63 
  -2   4  -9    1.21    0.12 
   2  -4   9    0.15    0.67 
   2  -4   9    1.12    0.15 
   2  -4   9    1.09    0.15 
  -2  -4  -9    1.13    0.37 
  -2  -4  -9    1.03    0.23 
   2   4  10    4.95    0.74 
   2   4  10    4.42    0.17 
   2  -4  10    4.09    0.20 
   2  -4  10    3.77    0.74 
  -2  -4 -10    3.96    0.39 
   2   4  11   56.07    0.85 
   2   4  11   58.35    1.22 
   2  -4  11   56.79    1.00 
   2  -4  11   56.97    1.19 
   2   4  12    1.26    0.19 
   2   4  12    1.31    0.68 
   2  -4  12    1.06    0.90 
   2  -4  12    0.81    0.22 
   2   4  13    0.00    0.19 
   2   4  13    0.76    0.96 
   2  -4  13    0.31    0.94 
   2  -4  13   -0.30    0.23 
   2   4  14    1.06    1.04 
   2  -4  14    1.19    1.06 
   2   4  15   -0.43    1.07 
   2  -4  15    1.02    0.86 
   2   4  16    2.82    1.22 
   2  -4  16   -0.11    1.07 
  -2   5  17    1.96    1.17 
   2  -5 -17   -0.29    0.38 
  -2  -5  17    0.86    1.09 
  -2   5  16    0.85    1.10 
  -2  -5  16    1.98    0.99 
   2  -5 -16    0.02    0.36 
  -2   5  15    0.02    1.00 
  -2  -5  15   -0.52    0.93 
   2  -5 -15   -0.22    0.32 
  -2   5  14    1.73    0.92 
  -2  -5  14    0.81    0.85 
   2  -5 -14    0.67    0.33 
  -2   5  13    7.67    0.12 
  -2   5  13    9.07    0.72 
  -2  -5  13    8.78    0.90 
  -2  -5  13    7.93    0.21 
   2  -5 -13    7.83    0.31 
  -2   5  12    2.96    0.81 
  -2   5  12    3.52    0.11 
  -2   5  12    3.84    0.12 
  -2  -5  12    3.27    0.18 
  -2  -5  12    4.11    0.83 
   2  -5 -12    3.52    0.29 
   2   5 -11    1.32    0.11 
  -2   5  11    1.26    0.10 
  -2   5  11    1.62    0.74 
   2  -5 -11    0.79    0.24 
  -2  -5  11    0.37    0.72 
  -2  -5  11    1.04    0.17 
  -2  -5  11    1.01    0.18 
   2   5 -10    2.11    0.11 
  -2   5  10    2.77    0.52 
   2   5 -10    1.71    0.45 
  -2   5  10    1.98    0.09 
   2  -5 -10    1.69    0.21 
   2  -5 -10    2.33    0.48 
  -2  -5  10    1.61    0.16 
  -2  -5  10    1.82    0.14 
  -2  -5  10    2.31    0.67 
  -2   5   9   91.79    1.22 
   2   5  -9   93.11    1.19 
   2   5  -9   92.29    0.81 
  -2   5   9   92.65    0.78 
  -2  -5   9   91.70    1.21 
   2  -5  -9   92.04    1.09 
  -2  -5   9   88.80    0.95 
   2  -5  -9   93.13    1.20 
  -2  -5   9   89.73    1.22 
   2  -5  -9   89.00    1.16 
  -2   5   8   29.21    0.69 
  -2   5   8   29.09    0.46 
   2   5  -8   28.40    0.44 
   2   5  -8   29.38    0.61 
  -2  -5   8   27.96    0.68 
   2  -5  -8   30.12    0.69 
  -2   5   7   59.17    0.58 
   2   5  -7   60.15    0.63 
  -2   5   7   60.37    0.92 
  -2   5   7   60.16    0.84 
   2   5  -7   59.70    0.76 
  -2  -5   7   57.31    0.71 
  -2  -5   7   57.38    0.88 
   2  -5  -7   60.95    0.88 
   2  -5  -7   58.89    1.05 
  -2  -5   7   58.72    0.89 
  -2   5   6   14.79    0.14 
   2   5  -6   15.30    0.13 
  -2   5   6   15.26    0.13 
  -2  -5   6   17.41    0.52 
  -2  -5   6   15.55    0.17 
   2  -5  -6   14.83    0.16 
  -2  -5   6   14.97    0.13 
   2  -5  -6   16.96    0.32 
   2   5  -5    1.30    0.17 
  -2   5   5    1.42    0.09 
  -2   5   5    1.44    0.38 
   2   5  -5    1.70    0.36 
   2   5  -5    1.47    0.08 
  -2   5   5    1.39    0.08 
   2  -5  -5    1.40    0.11 
   2  -5  -5    2.05    0.36 
  -2  -5   5    1.45    0.07 
  -2  -5   5    1.48    0.11 
  -2  -5   5    1.86    0.38 
   2  -5  -5    1.47    0.27 
   2   5  -4    9.62    0.24 
   2   5  -4   10.79    0.35 
  -2   5   4    9.24    0.10 
   2   5  -4    9.20    0.10 
  -2   5   4    8.87    0.09 
  -2   5   4   11.01    0.38 
   2  -5  -4    9.85    0.27 
   2  -5  -4   10.24    0.35 
  -2  -5   4    8.79    0.06 
  -2  -5   4   10.89    0.35 
   2  -5  -4    8.83    0.10 
  -2  -5   4    9.31    0.13 
   2   5  -3   10.26    0.11 
  -2   5   3    9.83    0.08 
   2   5  -3   11.12    0.24 
   2  -5  -3   11.52    0.27 
   2  -5  -3    9.75    0.09 
  -2  -5   3   10.24    0.12 
  -2  -5   3   11.41    0.23 
   2  -5  -3   10.38    0.11 
   2  -5  -2  991.80   28.57 
  -2  -5   2 1000.00   29.03 
   2   5  -1  312.80    3.68 
  -2   5   1  312.80    3.66 
  -2   5   1  311.90    3.66 
  -2   5   1  311.08    3.62 
  -2   5   1  311.42    3.61 
   2   5  -1  316.19    3.68 
  -2   5   1  309.92    3.64 
   2  -5  -1  312.58    3.68 
   2  -5  -1  313.03    3.69 
   2  -5  -1  309.04    3.57 
   2  -5  -1  306.73    3.56 
  -2  -5   1  313.02    3.66 
  -2  -5   1  314.51    3.65 
   2   5   0    4.59    0.25 
  -2   5   0    4.95    0.28 
  -2   5   0    4.37    0.13 
   2   5   0    4.76    0.22 
  -2   5   0    5.04    0.20 
   2   5   0    3.93    0.07 
   2   5   0    4.36    0.27 
   2  -5   0    4.47    0.30 
   2  -5   0    4.28    0.14 
  -2  -5   0    4.28    0.16 
  -2  -5   0    4.32    0.26 
   2  -5   0    4.52    0.17 
   2   5   1  128.58    1.17 
  -2   5  -1  126.19    0.97 
   2   5   1  127.97    1.14 
   2   5   1  128.89    1.10 
  -2   5  -1  129.35    1.17 
  -2   5  -1  126.72    1.09 
   2  -5   1  126.96    1.19 
   2  -5   1  127.67    1.12 
  -2  -5  -1  128.29    1.10 
   2  -5   1  128.05    0.98 
  -2  -5  -1  127.55    1.25 
  -2  -5  -1  126.65    1.06 
  -2   5  -2   29.43    0.32 
  -2   5  -2   30.08    0.39 
   2   5   2   29.69    0.49 
  -2   5  -2   29.79    0.48 
   2   5   2   29.15    0.45 
   2  -5   2   29.16    0.30 
  -2  -5  -2   29.84    0.44 
   2  -5   2   30.62    0.57 
  -2  -5  -2   29.46    0.43 
   2  -5   2   29.34    0.48 
  -2   5  -3  104.21    0.93 
  -2   5  -3  103.26    0.97 
   2   5   3  103.45    1.11 
   2   5   3  104.35    0.92 
   2   5   3  103.46    0.95 
  -2   5  -3  103.48    0.74 
   2  -5   3  103.04    0.98 
   2  -5   3  102.09    0.96 
  -2  -5  -3  103.74    1.21 
  -2  -5  -3  104.30    0.91 
  -2  -5  -3  102.86    0.94 
  -2   5  -4   76.92    0.74 
   2   5   4   78.22    0.82 
  -2   5  -4   78.48    0.61 
   2   5   4   76.93    0.84 
  -2   5  -4   78.12    0.85 
   2   5   4   77.51    0.98 
  -2  -5  -4   77.82    1.15 
  -2  -5  -4   78.11    0.82 
   2  -5   4   77.29    0.87 
  -2  -5  -4   76.76    0.78 
   2  -5   4   77.37    0.80 
   2   5   5   10.11    0.26 
   2   5   5   10.01    0.47 
  -2   5  -5    9.20    0.12 
   2   5   5    9.23    0.12 
  -2   5  -5    9.82    0.33 
  -2   5  -5    9.27    0.17 
   2  -5   5    9.88    0.37 
   2  -5   5    9.32    0.14 
  -2  -5  -5    9.46    0.17 
  -2  -5  -5    9.75    0.28 
  -2  -5  -5    9.69    0.32 
   2   5   6    0.80    0.14 
   2   5   6    0.53    0.37 
  -2   5  -6    1.31    0.49 
  -2   5  -6    0.83    0.13 
  -2   5  -6    0.82    0.19 
  -2  -5  -6    1.24    0.31 
  -2  -5  -6    0.80    0.45 
   2  -5   6    1.04    0.15 
   2  -5   6    1.07    0.53 
  -2  -5  -6    0.89    0.18 
  -2   5  -7    1.52    0.52 
  -2   5  -7    0.93    0.12 
   2   5   7    0.91    0.15 
   2   5   7    1.90    0.55 
  -2  -5  -7    0.91    0.20 
   2  -5   7    0.61    0.42 
   2  -5   7    1.12    0.16 
  -2  -5  -7    0.75    0.33 
  -2  -5  -7    1.42    0.51 
   2  -5   7    0.88    0.13 
  -2   5  -8   25.91    0.69 
  -2   5  -8   23.24    0.18 
   2   5   8   25.93    0.72 
  -2  -5  -8   24.10    0.43 
  -2  -5  -8   26.27    0.69 
   2  -5   8   25.63    0.74 
   2  -5   8   22.88    0.22 
  -2  -5  -8   22.38    0.25 
   2  -5   8   22.45    0.18 
  -2   5  -9    4.81    0.15 
   2   5   9    6.88    0.74 
  -2  -5  -9    5.22    0.46 
   2  -5   9    4.60    0.17 
   2  -5   9    5.84    0.60 
   2  -5   9    4.51    0.18 
  -2  -5  -9    4.33    0.25 
   2   5  10   20.83    0.86 
   2   5  10   17.40    0.19 
  -2   5 -10   17.49    0.19 
  -2  -5 -10   16.80    0.30 
   2  -5  10   17.00    0.22 
  -2  -5 -10   18.89    0.54 
   2   5  11    6.08    0.19 
   2   5  11    7.38    0.87 
   2  -5  11    7.07    0.70 
   2  -5  11    5.64    0.23 
   2   5  12    2.14    0.93 
   2   5  12    0.76    0.18 
   2  -5  12    0.79    0.90 
   2  -5  12    0.83    0.24 
   2   5  13    4.31    0.75 
   2   5  13    3.45    0.19 
   2  -5  13    4.49    0.99 
   2  -5  13    3.36    0.25 
   2   5  14    1.51    1.02 
   2   5  14    0.76    0.21 
   2  -5  14   -0.21    0.26 
   2  -5  14    0.92    0.74 
   2   5  15    0.59    1.11 
   2  -5  15    0.08    1.03 
   2   5  16    0.27    1.14 
   2  -5  16    0.47    1.10 
  -2   6  17    2.14    1.21 
   2  -6 -17    0.22    0.39 
  -2  -6  17    0.99    1.05 
  -2   6  16    1.67    1.07 
  -2  -6  16    2.30    1.04 
   2  -6 -16    0.76    0.36 
  -2   6  15    3.10    1.02 
   2  -6 -15    1.27    0.36 
  -2  -6  15    2.12    0.92 
  -2   6  14   -0.01    0.94 
   2  -6 -14   -0.23    0.34 
  -2  -6  14   -0.88    0.86 
  -2   6  13    0.79    0.89 
  -2  -6  13    1.32    0.86 
  -2  -6  13    0.04    0.19 
   2  -6 -13    1.25    0.34 
  -2   6  12   -0.05    0.82 
  -2   6  12    0.61    0.13 
  -2   6  12    0.44    0.11 
   2   6 -12    0.67    0.13 
   2  -6 -12    0.24    0.28 
  -2  -6  12    0.00    0.19 
  -2  -6  12    0.80    0.79 
  -2   6  11    5.48    0.11 
   2   6 -11    5.72    0.14 
  -2   6  11    7.25    0.80 
  -2   6  11    5.62    0.13 
  -2  -6  11    5.87    0.75 
   2  -6 -11    5.71    0.27 
  -2  -6  11    5.28    0.18 
  -2  -6  11    4.98    0.19 
  -2   6  10   14.99    0.15 
   2   6 -10   17.30    0.72 
  -2   6  10   18.37    0.77 
   2   6 -10   14.86    0.15 
   2  -6 -10   17.02    0.72 
  -2  -6  10   14.38    0.19 
  -2  -6  10   14.62    0.20 
   2  -6 -10   14.52    0.25 
  -2  -6  10   17.56    0.76 
  -2   6   9    1.38    0.61 
  -2   6   9    0.86    0.11 
   2   6  -9    0.78    0.11 
   2   6  -9    0.81    0.55 
  -2  -6   9    0.31    0.15 
  -2  -6   9    0.40    0.59 
   2  -6  -9    1.41    0.44 
   2  -6  -9    0.69    0.18 
  -2  -6   9    0.38    0.13 
   2  -6  -9    0.77    0.42 
  -2   6   8   44.07    0.90 
   2   6  -8   43.32    0.55 
  -2   6   8   44.14    0.57 
   2   6  -8   45.12    0.86 
   2  -6  -8   43.47    0.69 
  -2  -6   8   43.74    0.89 
   2  -6  -8   40.15    0.55 
   2   6  -7    5.65    0.52 
  -2   6   7    4.97    0.43 
   2   6  -7    3.94    0.29 
   2   6  -7    4.13    0.12 
  -2   6   7    3.84    0.12 
  -2   6   7    3.92    0.12 
   2  -6  -7    3.66    0.34 
  -2  -6   7    3.98    0.12 
   2  -6  -7    3.94    0.14 
  -2  -6   7    4.66    0.41 
  -2  -6   7    4.07    0.15 
   2  -6  -7    4.57    0.48 
  -2   6   6   25.79    0.51 
   2   6  -6   26.43    0.65 
   2   6  -6   26.78    0.47 
  -2   6   6   26.31    0.57 
   2   6  -6   27.09    0.67 
  -2  -6   6   26.32    0.69 
   2  -6  -6   25.60    0.63 
  -2  -6   6   28.57    0.68 
   2  -6  -6   26.31    0.67 
  -2   6   5   36.44    0.48 
   2   6  -5   36.58    0.45 
  -2   6   5   37.39    0.58 
   2   6  -5   37.25    0.55 
   2   6  -5   34.49    0.35 
   2  -6  -5   36.57    0.48 
   2  -6  -5   38.31    0.71 
  -2  -6   5   36.34    0.52 
  -2  -6   5   36.50    0.54 
   2  -6  -5   34.84    0.39 
  -2   6   4    1.94    0.35 
   2   6  -4    1.39    0.09 
   2   6  -4    1.64    0.18 
  -2   6   4    1.27    0.08 
   2   6  -4    1.87    0.32 
  -2   6   4    1.40    0.09 
   2  -6  -4    1.61    0.33 
  -2  -6   4    1.34    0.05 
   2  -6  -4    1.34    0.09 
  -2  -6   4    1.31    0.11 
  -2  -6   4    1.42    0.32 
   2  -6  -4    1.80    0.21 
   2   6  -3   18.67    0.43 
  -2   6   3   18.90    0.50 
  -2   6   3   18.72    0.50 
   2   6  -3   18.76    0.46 
  -2   6   3   19.41    0.45 
   2   6  -3   18.58    0.42 
  -2  -6   3   18.89    0.20 
  -2  -6   3   18.24    0.47 
   2  -6  -3   18.63    0.56 
  -2  -6   3   18.16    0.49 
   2  -6  -3   19.05    0.49 
   2  -6  -3   18.22    0.43 
  -2  -6   3   18.22    0.45 
   2  -6  -3   19.79    0.55 
  -2   6   2  156.40    1.40 
  -2   6   2  158.82    1.47 
   2   6  -2  158.41    1.42 
  -2   6   2  156.18    1.49 
   2   6  -2  157.62    1.43 
  -2   6   2  158.95    1.46 
  -2   6   2  157.56    1.42 
   2   6  -2  160.19    1.44 
   2  -6  -2  157.61    1.41 
  -2  -6   2  158.48    1.40 
   2  -6  -2  157.75    1.49 
   2  -6  -2  159.30    1.46 
   2  -6  -2  158.64    1.48 
  -2  -6   2  158.92    1.42 
   2   6  -1  151.58    1.15 
  -2   6   1  147.74    1.34 
   2   6  -1  150.71    1.37 
  -2   6   1  148.85    1.36 
  -2   6   1  152.32    1.40 
   2   6  -1  153.03    1.48 
  -2   6   1  150.62    1.40 
  -2   6   1  152.06    1.45 
   2   6  -1  150.71    1.45 
  -2  -6   1  153.46    1.41 
   2  -6  -1  150.99    1.41 
   2  -6  -1  153.97    1.46 
   2  -6  -1  151.66    1.42 
  -2  -6   1  151.51    1.37 
   2  -6  -1  150.00    1.38 
  -2  -6   1  150.85    1.25 
   2   6   0   10.16    0.24 
  -2   6   0   10.93    0.32 
  -2   6   0   10.27    0.23 
   2   6   0   10.71    0.32 
  -2   6   0    9.10    0.11 
   2   6   0   10.86    0.30 
   2  -6   0   10.80    0.34 
  -2  -6   0    9.86    0.18 
   2  -6   0    9.14    0.12 
   2  -6   0    9.84    0.19 
  -2   6  -1  228.55    2.40 
  -2   6  -1  223.90    2.15 
   2   6   1  233.08    2.43 
   2   6   1  226.10    2.34 
  -2   6  -1  228.68    2.37 
   2   6   1  227.67    2.38 
   2  -6   1  229.01    2.23 
  -2  -6  -1  224.68    2.41 
   2  -6   1  226.28    2.35 
   2  -6   1  226.42    2.39 
  -2  -6  -1  228.76    2.34 
  -2  -6  -1  229.27    2.37 
   2   6   2   85.88    0.82 
  -2   6  -2   84.50    0.81 
  -2   6  -2   85.06    0.74 
  -2   6  -2   84.23    0.64 
   2   6   2   85.67    0.88 
   2   6   2   85.02    0.75 
  -2  -6  -2   85.10    0.72 
   2  -6   2   84.60    0.63 
   2  -6   2   84.81    0.86 
  -2  -6  -2   85.83    1.07 
   2  -6   2   84.13    0.82 
  -2  -6  -2   84.55    0.77 
  -2   6  -3   12.21    0.40 
  -2   6  -3   12.42    0.32 
   2   6   3   10.62    0.29 
   2   6   3   11.95    0.45 
  -2  -6  -3   10.16    0.27 
  -2  -6  -3   12.67    0.47 
   2  -6   3   11.77    0.30 
   2  -6   3   12.78    0.48 
  -2   6  -4    0.78    0.15 
   2   6   4    0.87    0.25 
   2   6   4    0.85    0.30 
  -2   6  -4    0.83    0.11 
   2   6   4    0.72    0.11 
  -2   6  -4    0.82    0.38 
  -2  -6  -4    1.02    0.23 
   2  -6   4    0.24    0.40 
  -2  -6  -4    0.28    0.36 
  -2  -6  -4    0.81    0.14 
   2  -6   4    0.61    0.13 
   2   6   5  195.89    2.09 
  -2   6  -5  194.22    2.00 
   2   6   5  195.97    1.99 
   2   6   5  194.93    2.02 
  -2   6  -5  193.93    1.85 
  -2   6  -5  194.76    1.72 
   2  -6   5  193.63    1.84 
   2  -6   5  194.45    2.04 
  -2  -6  -5  200.65    2.46 
  -2  -6  -5  197.97    2.04 
  -2   6  -6   10.76    0.23 
   2   6   6   12.22    0.59 
   2   6   6    9.52    0.15 
  -2   6  -6   10.08    0.15 
  -2   6  -6   11.97    0.47 
  -2  -6  -6   12.16    0.54 
   2  -6   6   12.39    0.62 
   2  -6   6    9.96    0.18 
  -2  -6  -6    9.71    0.16 
  -2  -6  -6   12.14    0.39 
  -2   6  -7    2.03    0.53 
   2   6   7    1.13    0.14 
  -2   6  -7    1.42    0.13 
  -2   6  -7    1.30    0.21 
   2   6   7    2.21    0.59 
   2  -6   7    1.20    0.16 
  -2  -6  -7    1.48    0.16 
   2  -6   7    1.03    0.43 
  -2  -6  -7    1.34    0.36 
  -2  -6  -7    1.69    0.50 
   2  -6   7    1.40    0.13 
  -2   6  -8   22.70    0.32 
   2   6   8   25.20    0.66 
  -2   6  -8   24.42    0.60 
  -2  -6  -8   23.60    0.50 
   2  -6   8   24.16    0.65 
  -2   6  -9    2.70    0.14 
  -2   6  -9    2.87    0.27 
   2   6   9    3.64    0.69 
  -2  -6  -9    2.29    0.23 
   2  -6   9    2.60    0.18 
   2  -6   9    2.03    0.68 
   2  -6   9    2.65    0.15 
  -2  -6  -9    2.13    0.46 
   2   6  10    0.83    0.75 
  -2   6 -10    0.52    0.15 
  -2  -6 -10    0.46    0.28 
   2  -6  10    0.69    0.75 
   2  -6  10    0.99    0.23 
  -2   6 -11    4.73    0.16 
   2   6  11    4.88    0.19 
   2   6  11    5.91    0.85 
   2  -6  11    5.78    0.68 
   2  -6  11    4.57    0.24 
  -2  -6 -11    4.53    0.32 
   2   6  12    3.16    0.88 
   2   6  12    3.15    0.18 
   2  -6  12    3.43    0.23 
   2  -6  12    2.92    0.86 
   2   6  13    2.54    0.99 
   2   6  13    2.21    0.19 
   2  -6  13    1.17    0.25 
   2  -6  13    3.25    0.96 
   2   6  14    2.02    0.23 
   2   6  14    2.38    1.03 
  -2   6 -14    3.10    0.44 
   2  -6  14    1.00    0.27 
   2  -6  14    3.30    1.01 
   2   6  15    2.51    1.07 
   2  -6  15    0.32    1.00 
   2   6  16    0.74    1.21 
   2  -6  16    0.35    1.12 
  -2   7  17    1.05    1.17 
   2   7 -17    2.22    0.65 
   2  -7 -17   -0.38    0.46 
  -2  -7  17    0.37    1.08 
  -2   7  16    2.31    1.14 
   2   7 -16    1.17    0.53 
  -2  -7  16    0.37    1.01 
   2  -7 -16   -0.56    0.39 
  -2   7  15   12.63    1.14 
   2   7 -15    9.45    0.53 
   2  -7 -15    7.31    0.38 
  -2  -7  15    9.50    1.00 
   2   7 -14    1.61    0.48 
  -2   7  14    0.81    0.94 
   2  -7 -14   -0.37    0.34 
  -2  -7  14    0.03    0.90 
  -2   7  13    1.51    0.12 
  -2   7  13    1.23    0.86 
  -2  -7  13    0.84    0.83 
   2  -7 -13    2.80    0.35 
  -2  -7  13    1.21    0.21 
  -2   7  12    0.04    0.15 
  -2   7  12    0.30    0.12 
  -2   7  12    0.02    0.83 
   2   7 -12    0.35    0.14 
  -2  -7  12   -0.15    0.18 
  -2  -7  12   -0.21    0.20 
   2  -7 -12    0.17    0.23 
  -2  -7  12    0.54    0.80 
   2   7 -11    4.95    0.14 
  -2   7  11    6.08    0.81 
  -2   7  11    4.96    0.15 
  -2  -7  11    4.76    0.19 
  -2  -7  11    5.37    0.75 
  -2  -7  11    4.64    0.15 
   2  -7 -11    5.45    0.23 
  -2   7  10    0.27    0.13 
   2   7 -10   -0.12    0.34 
   2   7 -10    0.18    0.12 
  -2   7  10    0.18    0.64 
   2   7 -10    0.36    0.63 
   2  -7 -10   -0.32    0.21 
  -2  -7  10    0.02    0.65 
  -2  -7  10   -0.46    0.18 
  -2  -7  10   -0.05    0.14 
   2  -7 -10    0.67    0.72 
   2   7  -9    0.08    0.12 
   2   7  -9   -0.33    0.53 
   2   7  -9    0.00    0.31 
  -2   7   9    0.31    0.12 
  -2   7   9    0.48    0.62 
   2  -7  -9    0.11    0.56 
  -2  -7   9   -0.67    0.57 
  -2  -7   9   -0.08    0.12 
   2  -7  -9    0.04    0.17 
  -2  -7   9   -0.13    0.16 
  -2   7   8    4.30    0.46 
   2   7  -8    3.56    0.31 
   2   7  -8    3.44    0.12 
  -2   7   8    3.64    0.12 
   2   7  -8    4.23    0.43 
  -2   7   8    3.41    0.13 
  -2  -7   8    3.26    0.12 
   2  -7  -8    3.52    0.51 
   2  -7  -8    3.53    0.13 
  -2  -7   8    3.66    0.57 
   2  -7  -8    3.14    0.36 
  -2  -7   8    3.42    0.16 
  -2   7   7    0.57    0.12 
  -2   7   7    0.37    0.12 
   2   7  -7    0.37    0.31 
   2   7  -7    0.52    0.11 
  -2   7   7    0.38    0.51 
   2   7  -7    1.26    0.50 
  -2  -7   7    0.35    0.11 
  -2  -7   7    1.54    0.52 
   2  -7  -7    0.19    0.35 
  -2  -7   7    0.37    0.15 
   2  -7  -7    0.47    0.48 
   2  -7  -7    0.53    0.12 
  -2   7   6   16.04    0.15 
   2   7  -6   16.88    0.33 
  -2   7   6   15.45    0.14 
  -2   7   6   18.69    0.58 
   2   7  -6   17.72    0.52 
  -2  -7   6   18.21    0.54 
   2  -7  -6   15.51    0.14 
  -2  -7   6   15.37    0.12 
  -2  -7   6   16.01    0.20 
   2  -7  -6   16.95    0.33 
   2   7  -5   14.64    0.15 
  -2   7   5   14.08    0.12 
  -2   7   5   14.45    0.15 
  -2   7   5   16.82    0.52 
   2  -7  -5   13.89    0.15 
  -2  -7   5   14.75    0.19 
   2  -7  -5   15.85    0.36 
  -2  -7   5   13.93    0.10 
   2   7  -4    1.42    0.19 
  -2   7   4    1.07    0.07 
  -2   7   4    1.43    0.38 
   2   7  -4    1.71    0.35 
  -2   7   4    1.08    0.10 
   2   7  -4    1.21    0.11 
   2  -7  -4    1.86    0.35 
  -2  -7   4    1.35    0.16 
   2  -7  -4    1.12    0.08 
   2  -7  -4    1.36    0.26 
  -2  -7   4    1.49    0.34 
  -2  -7   4    0.98    0.05 
  -2  -7   4    1.16    0.13 
   2   7  -3    0.81    0.11 
  -2   7   3    1.30    0.26 
   2   7  -3    1.21    0.23 
  -2   7   3    0.87    0.11 
  -2   7   3    0.80    0.08 
  -2   7   3    1.26    0.36 
   2   7  -3    1.18    0.30 
  -2  -7   3    0.87    0.10 
   2  -7  -3    1.11    0.19 
   2  -7  -3    1.28    0.34 
  -2  -7   3    1.01    0.32 
  -2  -7   3    0.72    0.03 
   2  -7  -3    0.60    0.08 
   2  -7  -3    0.68    0.10 
  -2  -7   3    1.02    0.20 
  -2   7   2   12.24    0.34 
   2   7  -2   11.20    0.24 
   2   7  -2   10.62    0.11 
  -2   7   2   10.10    0.07 
  -2   7   2   10.61    0.13 
  -2   7   2   11.53    0.27 
  -2   7   2   11.84    0.37 
  -2  -7   2   11.16    0.22 
   2  -7  -2   11.22    0.21 
   2  -7  -2   10.14    0.09 
   2  -7  -2   10.52    0.13 
   2   7  -1    5.97    0.12 
  -2   7   1    5.72    0.07 
  -2   7   1    6.57    0.22 
  -2   7   1    6.12    0.13 
   2   7  -1    6.71    0.20 
  -2   7   1    7.10    0.33 
   2   7  -1    7.14    0.31 
  -2   7   1    7.30    0.35 
   2  -7  -1    7.50    0.35 
  -2  -7   1    7.02    0.30 
   2  -7  -1    5.72    0.07 
   2  -7  -1    6.28    0.14 
   2  -7  -1    6.57    0.22 
  -2  -7   1    6.48    0.22 
  -2  -7   1    5.88    0.06 
   2   7   0   28.41    0.40 
  -2   7   0   27.01    0.47 
  -2   7   0   28.92    0.55 
   2   7   0   27.56    0.47 
   2   7   0   27.62    0.44 
  -2   7   0   28.38    0.48 
   2   7   0   27.03    0.44 
  -2  -7   0   26.82    0.49 
   2  -7   0   28.47    0.47 
   2  -7   0   28.07    0.48 
  -2  -7   0   28.00    0.55 
   2  -7   0   27.50    0.42 
   2  -7   0   28.29    0.48 
  -2   7  -1    1.11    0.17 
  -2   7  -1    1.53    0.33 
   2   7   1    0.73    0.06 
  -2   7  -1    0.77    0.10 
   2   7   1    0.91    0.31 
   2   7   1    0.99    0.18 
   2  -7   1    1.14    0.33 
   2  -7   1    1.04    0.15 
  -2  -7  -1    0.65    0.10 
   2  -7   1    0.81    0.14 
  -2  -7  -1    1.19    0.29 
   2  -7   1    0.63    0.06 
  -2  -7  -1    0.95    0.19 
  -2   7  -2   97.02    0.80 
   2   7   2   98.10    0.97 
  -2   7  -2   98.50    0.96 
   2   7   2   97.35    0.93 
  -2   7  -2   97.57    0.88 
   2   7   2   99.68    0.98 
  -2  -7  -2   98.94    0.88 
   2  -7   2  100.03    0.81 
   2  -7   2   97.33    0.88 
  -2  -7  -2   98.45    1.19 
   2  -7   2   99.55    1.02 
  -2  -7  -2   97.47    0.90 
   2   7   3  194.01    1.93 
  -2   7  -3  192.67    1.86 
   2   7   3  192.91    1.98 
   2   7   3  194.32    1.87 
  -2   7  -3  192.71    1.68 
  -2   7  -3  193.06    1.92 
  -2  -7  -3  193.71    1.87 
   2  -7   3  191.68    1.91 
  -2  -7  -3  192.80    2.15 
  -2  -7  -3  193.36    1.89 
   2  -7   3  193.39    1.95 
   2  -7   3  191.97    1.65 
  -2   7  -4   17.83    0.16 
  -2   7  -4   20.51    0.42 
   2   7   4   20.24    0.51 
  -2   7  -4   19.03    0.22 
   2   7   4   19.18    0.33 
  -2  -7  -4   21.06    0.43 
   2  -7   4   20.61    0.45 
  -2  -7  -4   18.91    0.31 
   2  -7   4   17.89    0.19 
   2   7   5    3.90    0.38 
  -2   7  -5    3.37    0.19 
   2   7   5    3.29    0.14 
  -2   7  -5    3.42    0.47 
  -2   7  -5    3.37    0.14 
   2   7   5    4.41    0.32 
   2  -7   5    3.06    0.48 
  -2  -7  -5    3.82    0.43 
   2  -7   5    3.62    0.17 
  -2   7  -6   53.66    0.69 
   2   7   6   53.15    0.88 
   2   7   6   53.94    1.03 
  -2   7  -6   52.70    0.84 
  -2   7  -6   54.13    0.61 
   2   7   6   53.31    0.86 
   2  -7   6   54.04    0.92 
   2  -7   6   54.29    0.84 
  -2  -7  -6   55.38    0.85 
  -2  -7  -6   58.12    0.99 
   2   7   7    2.90    0.48 
   2   7   7    1.46    0.12 
  -2   7  -7    1.66    0.15 
  -2   7  -7    3.15    0.48 
  -2   7  -7    2.01    0.23 
  -2  -7  -7    1.58    0.17 
  -2  -7  -7    2.05    0.38 
   2  -7   7    1.61    0.13 
   2  -7   7    1.62    0.18 
   2  -7   7    2.25    0.60 
  -2  -7  -7    3.28    0.45 
   2   7   8   48.41    0.85 
  -2   7  -8   48.50    0.72 
  -2   7  -8   48.98    0.70 
   2  -7   8   47.20    0.85 
   2  -7   8   48.85    1.10 
   2  -7   8   47.16    0.94 
  -2  -7  -8   45.02    0.64 
  -2   7  -9    8.33    0.29 
  -2   7  -9    8.35    0.17 
   2   7   9    8.51    0.69 
  -2  -7  -9    7.97    0.25 
   2  -7   9    8.27    0.15 
   2  -7   9    8.09    0.22 
  -2  -7  -9    9.05    0.48 
   2  -7   9    8.87    0.70 
  -2   7 -10   16.69    0.22 
  -2   7 -10   17.24    0.37 
   2   7  10   18.56    0.71 
   2  -7  10   18.84    0.87 
  -2  -7 -10   15.69    0.33 
   2  -7  10   16.58    0.25 
  -2   7 -11   16.21    0.21 
  -2   7 -11   17.44    0.40 
   2   7  11   18.20    0.74 
   2  -7  11   15.69    0.25 
   2  -7  11   17.95    0.75 
  -2  -7 -11   16.08    0.35 
   2   7  12    3.28    0.20 
  -2   7 -12    4.37    0.41 
   2   7  12    4.61    0.76 
   2  -7  12    4.40    0.73 
  -2  -7 -12    2.96    0.36 
   2  -7  12    2.99    0.24 
   2   7  13    2.33    0.75 
  -2   7 -13    2.78    0.40 
   2   7  13    2.36    0.21 
   2  -7  13    1.00    0.26 
   2  -7  13    1.81    0.91 
   2   7  14    0.09    0.33 
  -2   7 -14    0.81    0.44 
   2   7  14   -0.34    0.99 
   2  -7  14    0.89    1.03 
   2  -7  14   -0.82    0.26 
   2   7  15    1.00    1.12 
   2  -7  15   -0.52    1.03 
   2   7  16    0.73    1.20 
   2  -7  16    2.01    1.16 
  -2  -8  17    0.82    1.11 
  -2   8  16    1.42    1.13 
   2   8 -16    1.35    0.55 
   2  -8 -16   -0.28    0.40 
  -2  -8  16    0.22    1.00 
   2   8 -15    0.88    0.58 
  -2   8  15    0.28    1.05 
  -2  -8  15   -0.41    0.96 
   2  -8 -15   -1.13    0.35 
   2   8 -14    1.25    0.49 
  -2   8  14    0.42    0.99 
   2  -8 -14   -0.39    0.36 
  -2  -8  14    0.94    0.95 
  -2   8  13    2.96    0.13 
  -2   8  13    3.82    0.94 
   2   8 -13    3.14    0.45 
  -2  -8  13    2.94    0.89 
   2  -8 -13    3.00    0.35 
  -2  -8  13    3.01    0.25 
   2   8 -12    0.92    0.43 
   2   8 -12    1.08    0.15 
  -2   8  12    0.95    0.16 
  -2   8  12    1.08    0.65 
  -2  -8  12    0.49    0.82 
   2  -8 -12    0.39    0.31 
  -2  -8  12    0.53    0.22 
  -2  -8  12    0.67    0.16 
  -2   8  11   49.43    1.10 
  -2   8  11   47.48    0.74 
   2   8 -11   43.59    0.58 
   2   8 -11   45.99    0.69 
  -2  -8  11   47.47    0.93 
  -2   8  10    8.84    0.15 
  -2   8  10    9.50    0.57 
   2   8 -10    8.75    0.15 
   2   8 -10   10.27    0.56 
   2   8 -10    9.34    0.39 
  -2  -8  10    8.66    0.16 
   2  -8 -10    8.28    0.21 
  -2  -8  10    8.53    0.21 
  -2  -8  10    9.11    0.71 
  -2   8   9    1.02    0.62 
   2   8  -9    1.36    0.33 
   2   8  -9    1.42    0.57 
   2   8  -9    1.06    0.13 
  -2   8   9    1.36    0.14 
   2  -8  -9    1.06    0.17 
  -2  -8   9    1.04    0.19 
   2  -8  -9    1.45    0.45 
  -2  -8   9    1.33    0.61 
  -2  -8   9    1.11    0.13 
  -2   8   8    1.67    0.45 
   2   8  -8    1.03    0.13 
   2   8  -8    0.98    0.51 
   2   8  -8    1.22    0.31 
  -2   8   8    1.23    0.13 
   2  -8  -8    1.51    0.30 
   2  -8  -8    1.09    0.16 
  -2  -8   8    1.00    0.11 
  -2  -8   8    1.34    0.55 
  -2  -8   8    1.03    0.18 
   2  -8  -8    2.38    0.57 
   2   8  -7    2.81    0.31 
   2   8  -7    2.24    0.49 
  -2   8   7    2.21    0.13 
  -2   8   7    3.21    0.56 
   2   8  -7    2.25    0.13 
  -2   8   7    2.23    0.13 
  -2  -8   7    1.99    0.16 
  -2  -8   7    2.68    0.53 
   2  -8  -7    3.06    0.38 
  -2  -8   7    2.06    0.11 
   2  -8  -7    2.89    0.51 
   2  -8  -7    2.04    0.15 
  -2   8   6   13.23    0.56 
   2   8  -6   11.38    0.16 
  -2   8   6   11.20    0.15 
   2   8  -6   12.21    0.33 
  -2   8   6   10.88    0.11 
  -2  -8   6   11.18    0.20 
   2  -8  -6   13.63    0.53 
   2  -8  -6   11.97    0.38 
   2  -8  -6   10.90    0.15 
  -2  -8   6   13.17    0.53 
  -2  -8   6   10.62    0.10 
  -2   8   5    7.96    0.15 
  -2   8   5    9.66    0.51 
  -2   8   5    7.37    0.12 
   2   8  -5    8.07    0.15 
   2   8  -5    8.68    0.31 
   2  -8  -5    7.57    0.12 
   2  -8  -5    8.40    0.28 
  -2  -8   5   10.12    0.50 
  -2  -8   5    7.36    0.21 
   2   8  -4    0.58    0.36 
  -2   8   4    0.16    0.09 
  -2   8   4    0.35    0.13 
   2   8  -4    0.39    0.12 
   2   8  -4    0.32    0.25 
  -2   8   4    0.82    0.43 
  -2  -8   4    0.05    0.21 
  -2  -8   4    0.44    0.15 
  -2  -8   4    0.29    0.05 
   2  -8  -4    0.28    0.10 
  -2  -8   4    0.92    0.38 
   2  -8  -4    0.66    0.28 
   2  -8  -4    0.32    0.37 
   2   8  -3    9.78    0.21 
  -2   8   3    9.88    0.39 
  -2   8   3   10.08    0.29 
  -2   8   3    9.01    0.08 
   2   8  -3    9.33    0.12 
   2   8  -3   10.42    0.35 
  -2   8   3    9.45    0.14 
  -2  -8   3    9.50    0.23 
   2  -8  -3   10.27    0.37 
   2  -8  -3    9.29    0.12 
  -2  -8   3   10.44    0.37 
  -2  -8   3    9.46    0.14 
   2  -8  -3    9.59    0.21 
   2  -8  -3    9.11    0.08 
  -2   8   2   32.62    0.51 
   2   8  -2   32.65    0.50 
  -2   8   2   31.97    0.60 
  -2   8   2   32.02    0.56 
   2   8  -2   32.54    0.55 
  -2   8   2   31.99    0.54 
   2   8  -2   32.54    0.57 
  -2   8   2   32.26    0.49 
   2  -8  -2   31.96    0.56 
  -2  -8   2   32.73    0.29 
   2  -8  -2   33.42    0.55 
   2  -8  -2   32.85    0.46 
  -2  -8   2   32.70    0.53 
  -2  -8   2   32.72    0.44 
   2  -8  -2   31.30    0.45 
  -2   8   1  159.05    1.41 
   2   8  -1  158.58    1.13 
  -2   8   1  159.63    1.39 
  -2   8   1  157.58    1.42 
  -2   8   1  157.93    1.33 
   2   8  -1  158.62    1.37 
   2   8  -1  158.43    1.37 
  -2   8   1  157.25    1.41 
   2   8  -1  158.16    1.43 
   2  -8  -1  155.51    1.38 
  -2  -8   1  156.94    1.25 
   2  -8  -1  159.25    1.38 
   2  -8  -1  158.17    1.45 
  -2  -8   1  158.80    1.38 
  -2  -8   1  157.75    1.40 
   2  -8  -1  157.73    1.38 
  -2   8   0   46.83    0.56 
  -2   8   0   45.08    0.50 
   2   8   0   44.85    0.41 
   2   8   0   44.51    0.54 
   2   8   0   45.17    0.52 
   2   8   0   44.97    0.58 
  -2   8   0   44.57    0.45 
  -2   8   0   45.75    0.56 
   2   8   0   44.50    0.60 
   2  -8   0   46.20    0.68 
   2  -8   0   44.03    0.56 
  -2  -8   0   44.76    0.57 
  -2  -8   0   44.91    0.47 
   2  -8   0   44.58    0.48 
   2  -8   0   44.48    0.49 
   2   8   1   79.25    0.84 
  -2   8  -1   78.96    0.79 
  -2   8  -1   78.68    0.71 
   2   8   1   78.79    0.76 
   2   8   1   78.62    0.78 
   2   8   1   79.08    0.73 
  -2   8  -1   78.57    0.83 
   2  -8   1   79.23    0.88 
   2  -8   1   78.48    0.68 
  -2  -8  -1   77.94    0.75 
  -2  -8  -1   78.33    0.90 
   2  -8   1   77.86    0.80 
  -2  -8  -1   78.89    0.78 
   2  -8   1   78.44    0.66 
   2   8   2    4.17    0.08 
  -2   8  -2    4.45    0.17 
   2   8   2    4.57    0.35 
  -2   8  -2    4.51    0.35 
   2   8   2    4.19    0.25 
  -2   8  -2    4.38    0.10 
  -2  -8  -2    4.55    0.33 
  -2  -8  -2    4.23    0.11 
  -2  -8  -2    4.48    0.17 
   2  -8   2    4.72    0.37 
   2  -8   2    4.40    0.16 
   2  -8   2    4.50    0.18 
  -2   8  -3   61.11    0.78 
  -2   8  -3   62.10    0.62 
   2   8   3   61.29    0.80 
   2   8   3   61.06    0.82 
   2   8   3   61.35    0.82 
  -2   8  -3   62.05    0.79 
   2  -8   3   62.02    0.83 
   2  -8   3   62.30    0.87 
  -2  -8  -3   62.74    0.78 
  -2  -8  -3   61.51    0.77 
   2  -8   3   61.72    0.59 
  -2  -8  -3   61.52    1.04 
  -2   8  -4   17.57    0.46 
   2   8   4   15.83    0.37 
  -2   8  -4   18.02    0.47 
   2   8   4   16.97    0.48 
  -2   8  -4   17.61    0.56 
   2  -8   4   17.15    0.43 
   2  -8   4   16.98    0.49 
  -2  -8  -4   18.14    0.54 
  -2   8  -5   33.67    0.50 
   2   8   5   31.78    0.44 
  -2   8  -5   34.69    0.67 
   2   8   5   33.31    0.66 
  -2  -8  -5   34.01    0.56 
   2  -8   5   33.20    0.67 
  -2  -8  -5   32.09    0.42 
   2   8   6    8.74    0.16 
  -2   8  -6   10.94    0.58 
   2   8   6   10.52    0.59 
  -2   8  -6    9.90    0.25 
   2   8   6    9.34    0.35 
  -2   8  -6    8.96    0.16 
  -2  -8  -6   10.57    0.37 
   2  -8   6   10.03    0.60 
   2  -8   6    9.10    0.21 
  -2  -8  -6   11.16    0.56 
  -2  -8  -6    9.12    0.22 
  -2   8  -7   33.11    0.73 
   2   8   7   33.57    0.75 
  -2   8  -7   33.66    0.62 
  -2   8  -7   33.59    0.71 
  -2  -8  -7   33.99    0.84 
  -2  -8  -7   30.93    0.55 
   2  -8   7   32.61    0.84 
  -2   8  -8    4.48    0.15 
   2   8   8    4.84    0.50 
  -2   8  -8    4.64    0.27 
   2  -8   8    4.35    0.14 
  -2  -8  -8    4.19    0.24 
   2  -8   8    4.16    0.21 
   2  -8   8    4.31    0.65 
  -2  -8  -8    4.73    0.42 
  -2   8  -9    8.83    0.17 
  -2   8  -9    9.25    0.32 
   2   8   9   11.34    0.76 
   2  -8   9    8.87    0.18 
  -2  -8  -9    8.21    0.27 
   2  -8   9    8.51    0.21 
   2  -8   9    9.41    0.76 
   2   8  10   -0.39    0.77 
  -2   8 -10    0.19    0.17 
  -2   8 -10    0.15    0.33 
  -2  -8 -10   -0.15    0.30 
   2  -8  10   -1.18    0.76 
   2  -8  10    0.26    0.25 
   2   8  11    2.82    0.86 
  -2   8 -11    3.04    0.35 
   2  -8  11    2.30    0.23 
  -2  -8 -11    2.61    0.32 
   2  -8  11    2.81    0.85 
   2   8  12    1.22    0.93 
   2   8  12    0.50    0.18 
  -2   8 -12    1.12    0.40 
   2  -8  12   -0.04    0.23 
   2  -8  12    0.48    0.69 
  -2  -8 -12    0.50    0.28 
  -2   8 -13    0.62    0.41 
   2   8  13    1.84    1.01 
   2   8  13    0.42    0.20 
   2  -8  13   -0.52    0.27 
   2  -8  13    0.55    0.74 
  -2   8 -14   -0.23    0.45 
   2   8  14    0.37    1.07 
   2  -8  14   -1.00    0.28 
   2  -8  14    1.29    1.02 
   2   8  15    2.70    1.17 
   2  -8  15    0.52    1.07 
   2   8  16    2.42    1.21 
   2  -8  16    2.05    1.19 
   2   9 -16    0.34    0.56 
  -2   9  16   -0.11    0.86 
  -2  -9  16   -1.45    1.03 
   2  -9 -16   -0.73    0.42 
   2   9 -15    8.35    0.55 
  -2   9  15   10.16    0.92 
  -2  -9  15    8.88    1.05 
   2  -9 -15    6.76    0.42 
   2   9 -14    0.59    0.57 
  -2   9  14    0.67    0.77 
   2  -9 -14   -0.94    0.37 
  -2  -9  14   -0.07    0.92 
  -2   9  13    0.07    0.90 
  -2   9  13    0.31    0.15 
   2   9 -13    0.40    0.53 
  -2  -9  13   -0.52    0.24 
   2  -9 -13   -0.30    0.35 
  -2  -9  13   -0.56    0.87 
  -2   9  12    0.71    0.87 
   2   9 -12    0.22    0.48 
   2   9 -12    0.21    0.16 
  -2   9  12    0.25    0.19 
   2  -9 -12   -0.06    0.31 
  -2  -9  12    0.42    0.18 
  -2  -9  12    0.19    0.25 
  -2  -9  12   -0.64    0.79 
  -2   9  11    8.94    0.18 
   2   9 -11    9.92    0.46 
   2   9 -11    8.71    0.17 
  -2   9  11   10.33    0.66 
  -2  -9  11    9.75    0.80 
  -2  -9  11    8.71    0.16 
  -2  -9  11    8.73    0.24 
   2  -9 -11    8.43    0.27 
   2   9 -10    5.00    0.16 
  -2   9  10    5.40    0.76 
  -2   9  10    5.57    0.18 
   2   9 -10    5.42    0.68 
   2   9 -10    5.07    0.39 
  -2  -9  10    4.88    0.24 
  -2  -9  10    5.60    0.70 
  -2  -9  10    5.06    0.16 
   2  -9 -10    4.92    0.21 
   2   9  -9   36.85    0.50 
   2   9  -9   34.48    0.23 
  -2   9   9   34.65    0.23 
   2  -9  -9   33.67    0.26 
  -2  -9   9   34.58    0.29 
  -2  -9   9   33.98    0.20 
  -2  -9   9   38.99    0.84 
   2   9  -8    3.38    0.34 
  -2   9   8    3.35    0.15 
  -2   9   8    4.06    0.60 
   2   9  -8    2.92    0.15 
   2   9  -8    4.39    0.46 
  -2  -9   8    3.47    0.58 
   2  -9  -8    2.91    0.13 
  -2  -9   8    3.02    0.20 
  -2  -9   8    2.89    0.11 
   2  -9  -8    3.57    0.44 
   2   9  -7   17.28    0.19 
  -2   9   7   16.49    0.16 
   2   9  -7   18.44    0.38 
  -2   9   7   16.88    0.18 
   2  -9  -7   16.24    0.18 
  -2  -9   7   17.05    0.22 
  -2  -9   7   16.75    0.14 
   2  -9  -7   18.69    0.38 
  -2   9   6    4.82    0.57 
   2   9  -6    4.18    0.49 
  -2   9   6    2.71    0.12 
   2   9  -6    2.93    0.30 
  -2   9   6    2.80    0.14 
   2   9  -6    3.15    0.15 
   2  -9  -6    2.98    0.48 
  -2  -9   6    4.67    0.54 
  -2  -9   6    3.11    0.22 
   2  -9  -6    2.83    0.15 
   2  -9  -6    3.44    0.30 
  -2  -9   6    2.67    0.09 
   2   9  -5   60.27    0.81 
  -2   9   5   60.90    0.76 
  -2   9   5   60.08    0.85 
   2   9  -5   60.36    0.82 
  -2   9   5   61.55    0.90 
   2   9  -5   63.99    0.81 
  -2  -9   5   61.24    0.63 
  -2  -9   5   61.07    0.85 
   2  -9  -5   61.06    0.96 
   2  -9  -5   59.12    0.70 
  -2  -9   5   61.69    0.91 
   2  -9  -5   60.05    0.93 
  -2   9   4    1.62    0.09 
   2   9  -4    1.77    0.13 
  -2   9   4    1.33    0.14 
  -2   9   4    1.71    0.24 
   2   9  -4    1.93    0.30 
   2   9  -4    1.74    0.27 
  -2   9   4    1.69    0.43 
   2  -9  -4    1.36    0.40 
  -2  -9   4    1.60    0.23 
   2  -9  -4    1.40    0.29 
  -2  -9   4    1.32    0.39 
   2  -9  -4    1.62    0.10 
  -2  -9   4    1.90    0.18 
   2   9  -3  102.76    1.04 
   2   9  -3  100.51    0.98 
  -2   9   3  102.61    1.00 
  -2   9   3  102.66    1.07 
  -2   9   3  101.80    1.10 
  -2   9   3  101.68    1.00 
   2   9  -3  101.20    0.97 
  -2  -9   3  102.50    0.59 
  -2  -9   3  101.97    1.00 
   2  -9  -3  102.31    1.00 
  -2  -9   3  102.30    1.10 
   2  -9  -3  100.48    1.05 
   2  -9  -3  101.18    1.04 
   2  -9  -3  102.87    1.03 
  -2  -9   3  103.09    0.98 
   2   9  -2   57.01    0.77 
  -2   9   2   55.64    0.77 
   2   9  -2   55.84    0.68 
  -2   9   2   54.62    0.67 
   2   9  -2   54.54    0.72 
  -2   9   2   55.96    0.63 
  -2   9   2   55.47    0.73 
  -2   9   2   56.77    0.69 
  -2  -9   2   55.52    0.69 
   2  -9  -2   56.38    0.76 
   2  -9  -2   55.59    0.72 
   2  -9  -2   55.58    0.71 
  -2  -9   2   55.61    0.46 
  -2  -9   2   54.36    0.70 
   2  -9  -2   56.09    0.75 
  -2   9   1   31.57    0.46 
  -2   9   1   33.42    0.47 
  -2   9   1   33.88    0.46 
   2   9  -1   33.09    0.48 
   2   9  -1   32.07    0.42 
   2   9  -1   32.81    0.31 
  -2   9   1   33.12    0.49 
  -2   9   1   33.24    0.60 
   2  -9  -1   31.76    0.50 
  -2  -9   1   32.56    0.53 
   2  -9  -1   32.66    0.50 
  -2  -9   1   33.11    0.54 
  -2  -9   1   33.10    0.46 
   2   9   0   12.76    0.29 
   2   9   0   11.33    0.07 
  -2   9   0   11.21    0.07 
  -2   9   0   11.84    0.13 
   2   9   0   11.52    0.15 
   2   9   0   13.20    0.39 
   2  -9   0   12.56    0.23 
  -2  -9   0   12.55    0.22 
   2  -9   0   11.35    0.08 
  -2  -9   0   11.22    0.09 
   2  -9   0   11.76    0.17 
   2  -9   0   13.85    0.44 
   2   9   1   10.54    0.09 
   2   9   1   10.98    0.16 
   2   9   1   12.03    0.30 
  -2   9  -1   11.25    0.17 
   2  -9   1   11.43    0.19 
  -2  -9  -1   10.51    0.12 
  -2   9  -2    4.67    0.15 
  -2   9  -2    5.49    0.23 
   2   9   2    5.27    0.41 
   2   9   2    4.91    0.29 
  -2   9  -2    6.00    0.41 
  -2  -9  -2    4.76    0.14 
  -2  -9  -2    5.92    0.38 
   2  -9   2    4.82    0.13 
   2  -9   2    5.28    0.19 
  -2  -9  -2    5.38    0.21 
   2  -9   2    5.82    0.44 
  -2   9  -3   34.52    0.58 
  -2   9  -3   33.63    0.68 
   2   9   3   32.80    0.67 
   2   9   3   33.36    0.69 
  -2   9  -3   32.61    0.55 
   2   9   3   32.66    0.59 
   2  -9   3   32.73    0.70 
  -2  -9  -3   33.17    0.56 
   2  -9   3   32.99    0.63 
  -2  -9  -3   37.79    1.00 
  -2  -9  -3   33.61    0.64 
   2  -9   3   33.68    0.46 
  -2   9  -4   19.96    0.57 
  -2   9  -4   18.07    0.28 
   2   9   4   19.84    0.49 
   2   9   4   18.50    0.41 
   2  -9   4   17.30    0.23 
  -2  -9  -4   18.31    0.36 
   2  -9   4   19.76    0.51 
   2  -9   4   16.56    0.22 
  -2  -9  -4   19.97    0.53 
   2   9   5    1.47    0.52 
   2   9   5    1.03    0.13 
  -2   9  -5    1.12    0.23 
   2   9   5    0.87    0.34 
  -2   9  -5    1.20    0.15 
  -2   9  -5    1.37    0.50 
   2  -9   5    1.54    0.54 
  -2  -9  -5    1.43    0.19 
  -2  -9  -5    1.42    0.25 
  -2  -9  -5    0.68    0.44 
   2  -9   5    1.08    0.19 
  -2   9  -6   16.03    0.69 
  -2   9  -6   12.81    0.28 
   2   9   6   12.45    0.41 
   2   9   6   14.07    0.65 
  -2  -9  -6   16.35    0.65 
  -2  -9  -6   13.08    0.39 
   2  -9   6   15.00    0.59 
  -2   9  -7    7.69    0.58 
  -2   9  -7    6.69    0.17 
  -2   9  -7    6.82    0.25 
   2   9   7    8.72    0.64 
  -2  -9  -7    6.73    0.17 
   2  -9   7    7.04    0.48 
  -2  -9  -7    6.89    0.36 
   2  -9   7    6.44    0.20 
  -2   9  -8    0.37    0.16 
   2   9   8   -0.05    0.65 
  -2   9  -8    0.23    0.26 
   2  -9   8    0.38    0.13 
   2  -9   8    0.14    0.67 
  -2  -9  -8    0.14    0.25 
   2  -9   8    0.04    0.20 
  -2  -9  -8   -0.06    0.36 
  -2   9  -9   46.36    0.28 
   2  -9   9   46.04    0.28 
   2  -9   9   50.85    0.98 
   2  -9   9   46.89    0.34 
  -2  -9  -9   45.78    0.38 
  -2   9 -10   -0.38    0.32 
   2   9  10   -0.35    0.78 
   2  -9  10   -0.56    0.79 
  -2  -9 -10   -0.04    0.24 
   2  -9  10   -0.15    0.25 
  -2   9 -11    1.77    0.37 
   2   9  11    1.68    0.66 
   2  -9  11    1.37    0.24 
  -2  -9 -11    1.05    0.33 
   2  -9  11    1.25    0.85 
  -2   9 -12    1.30    0.40 
   2   9  12    0.73    0.92 
   2  -9  12    0.89    0.89 
  -2  -9 -12    0.88    0.37 
   2  -9  12    0.79    0.26 
   2   9  13    3.51    1.05 
  -2   9 -13    2.38    0.43 
   2   9  13    1.97    0.19 
   2  -9  13    1.04    0.25 
  -2  -9 -13    1.29    0.39 
   2  -9  13    3.83    1.02 
   2   9  14    1.22    1.08 
   2  -9  14    0.10    1.02 
   2  -9  14   -1.00    0.29 
   2   9  15    2.78    1.16 
   2  -9  15    1.50    0.86 
   2  -9  16    0.31    1.17 
   2  10 -16    0.76    0.65 
  -2  10  16    1.12    1.14 
  -2 -10  16   -0.39    1.05 
   2 -10 -16   -0.85    0.44 
   2  10 -15    0.57    0.54 
  -2  10  15    2.12    1.09 
   2 -10 -15   -1.37    0.37 
  -2 -10  15   -0.61    0.96 
   2  10 -14    1.64    0.50 
  -2  10  14    2.05    1.02 
   2 -10 -14    0.83    0.39 
  -2 -10  14    0.95    0.91 
   2  10 -13    0.73    0.48 
  -2  10  13    1.02    0.96 
  -2 -10  13   -0.51    0.89 
  -2 -10  13   -0.09    0.26 
   2 -10 -13   -1.06    0.36 
  -2  10  12    2.26    0.68 
   2  10 -12    1.92    0.18 
   2  10 -12    1.97    0.44 
   2 -10 -12    2.37    0.35 
  -2 -10  12    1.82    0.26 
  -2 -10  12    2.28    0.84 
  -2 -10  12    2.15    0.18 
  -2  10  11   37.83    1.03 
   2  10 -11   32.46    0.24 
   2  10 -11   34.27    0.54 
  -2  10  11   32.70    0.25 
  -2 -10  11   31.95    0.23 
  -2 -10  11   32.32    0.32 
  -2 -10  11   37.65    1.01 
   2 -10 -11   31.64    0.35 
  -2  10  10    7.53    0.18 
   2  10 -10    7.66    0.45 
   2  10 -10    7.37    0.18 
  -2  10  10    8.34    0.78 
  -2 -10  10    7.16    0.15 
  -2 -10  10    8.31    0.75 
  -2 -10  10    6.93    0.25 
   2  10  -9    2.58    0.37 
  -2  10   9    3.21    0.69 
   2  10  -9    2.24    0.62 
  -2  10   9    2.41    0.16 
   2  10  -9    1.91    0.16 
  -2 -10   9    1.87    0.22 
  -2 -10   9    2.23    0.65 
  -2 -10   9    2.41    0.13 
   2 -10  -9    2.16    0.15 
   2  10  -8    1.61    0.56 
  -2  10   8    1.45    0.16 
  -2  10   8    1.73    0.62 
   2  10  -8    1.61    0.35 
   2  10  -8    1.20    0.14 
   2 -10  -8    1.23    0.17 
  -2 -10   8    1.26    0.21 
   2 -10  -8    1.42    0.56 
  -2 -10   8    1.22    0.11 
  -2 -10   8    1.76    0.59 
  -2  10   7   11.80    0.18 
   2  10  -7   11.44    0.17 
   2  10  -7   13.06    0.37 
  -2  10   7   14.40    0.66 
   2  10  -7   14.16    0.61 
  -2 -10   7   11.31    0.11 
   2 -10  -7   11.34    0.14 
  -2 -10   7   11.40    0.21 
   2 -10  -7   12.71    0.57 
   2 -10  -7   11.82    0.44 
  -2 -10   7   13.55    0.61 
   2  10  -6    5.36    0.48 
  -2  10   6    4.45    0.14 
   2  10  -6    4.56    0.15 
  -2  10   6    4.37    0.12 
   2  10  -6    4.42    0.29 
  -2  10   6    5.21    0.56 
  -2 -10   6    5.25    0.53 
   2 -10  -6    4.64    0.38 
  -2 -10   6    4.71    0.19 
   2 -10  -6    4.36    0.11 
   2 -10  -6    4.90    0.37 
  -2 -10   6    4.44    0.08 
   2  10  -5   11.84    0.34 
   2  10  -5   10.72    0.16 
  -2  10   5   10.41    0.18 
  -2  10   5   10.30    0.12 
  -2  10   5   13.18    0.57 
   2  10  -5   12.22    0.50 
  -2 -10   5   11.26    0.28 
   2 -10  -5   10.28    0.14 
  -2 -10   5   10.76    0.22 
  -2 -10   5   12.87    0.45 
   2 -10  -5   12.11    0.51 
   2 -10  -5   11.42    0.31 
  -2 -10   5   10.62    0.08 
  -2  10   4    3.44    0.54 
  -2  10   4    2.30    0.38 
   2  10  -4    3.67    0.49 
   2  10  -4    2.60    0.34 
  -2  10   4    1.87    0.19 
  -2 -10   4    1.60    0.21 
  -2 -10   4    2.44    0.28 
   2 -10  -4    2.43    0.36 
  -2 -10   4    3.67    0.51 
   2 -10  -4    3.91    0.51 
  -2  10   3    1.46    0.25 
  -2  10   3    0.76    0.15 
  -2  10   3    1.24    0.45 
  -2  10   3    1.13    0.09 
  -2  10   3    0.87    0.38 
   2  10  -3    1.44    0.39 
   2  10  -3    1.03    0.15 
   2  10  -3    1.44    0.29 
  -2 -10   3    1.18    0.04 
  -2 -10   3    1.83    0.43 
   2 -10  -3    1.07    0.22 
   2 -10  -3    1.46    0.43 
  -2 -10   3    1.31    0.24 
   2 -10  -3    1.02    0.10 
  -2 -10   3    1.54    0.20 
   2 -10  -3    0.90    0.14 
  -2  10   2  240.34    2.70 
  -2  10   2  240.41    2.73 
   2  10  -2  238.66    2.66 
   2  10  -2  238.04    2.68 
  -2  10   2  242.89    2.70 
   2  10  -2  240.08    2.73 
  -2  10   2  244.78    2.79 
  -2  10   2  238.28    2.66 
   2 -10  -2  239.56    2.73 
  -2 -10   2  241.34    2.73 
  -2 -10   2  242.41    2.40 
  -2 -10   2  243.02    2.74 
   2 -10  -2  238.41    2.67 
   2 -10  -2  239.59    2.71 
  -2  10   1    0.84    0.07 
  -2  10   1    1.09    0.15 
  -2  10   1    0.78    0.26 
   2  10  -1    1.15    0.27 
   2  10  -1    0.82    0.14 
  -2  10   1    1.01    0.36 
   2  10  -1    1.21    0.36 
   2  10  -1    0.81    0.05 
  -2  10   1    0.71    0.40 
   2  10  -1    0.88    0.37 
   2 -10  -1    0.79    0.23 
   2 -10  -1    0.87    0.09 
   2 -10  -1    0.75    0.38 
  -2 -10   1    1.02    0.24 
  -2 -10   1    0.80    0.37 
  -2 -10   1    0.90    0.07 
   2 -10  -1    1.02    0.16 
  -2  10   0  140.15    1.30 
   2  10   0  137.78    1.43 
  -2  10   0  137.28    1.42 
   2  10   0  140.82    1.43 
   2  10   0  139.65    1.20 
   2  10   0  138.37    1.36 
  -2  10   0  142.05    1.45 
   2  10   0  140.27    1.48 
  -2  10   0  137.81    1.37 
   2 -10   0  139.56    1.45 
   2 -10   0  140.54    1.36 
   2 -10   0  139.92    1.32 
  -2 -10   0  140.75    1.37 
  -2 -10   0  140.51    1.40 
   2 -10   0  138.45    1.48 
   2  10   1    9.60    0.42 
  -2  10  -1    9.88    0.39 
  -2  10  -1    7.69    0.17 
   2  10   1    9.33    0.45 
   2  10   1    8.86    0.32 
  -2  10  -1    8.61    0.27 
   2 -10   1    9.72    0.48 
  -2 -10  -1    8.43    0.28 
   2 -10   1    8.71    0.24 
  -2 -10  -1    9.46    0.42 
  -2  10  -2  154.66    1.59 
  -2  10  -2  157.74    1.57 
   2  10   2  153.64    1.54 
  -2  10  -2  154.42    1.62 
   2  10   2  151.96    1.57 
   2  10   2  152.55    1.61 
  -2 -10  -2  153.44    1.50 
   2 -10   2  152.77    1.66 
   2 -10   2  154.61    1.46 
   2 -10   2  154.13    1.45 
   2 -10   2  155.00    1.63 
  -2 -10  -2  155.78    1.58 
   2  10   3  100.54    1.14 
   2  10   3   97.88    1.20 
  -2  10  -3   97.45    1.11 
   2  10   3   97.11    1.02 
  -2  10  -3   96.80    1.01 
  -2  10  -3   98.04    1.01 
  -2 -10  -3   97.66    1.11 
   2 -10   3   96.19    1.21 
  -2 -10  -3   94.81    0.96 
   2 -10   3   98.03    1.15 
   2 -10   3   96.34    0.91 
   2  10   4    5.19    0.12 
   2  10   4    5.51    0.50 
  -2  10  -4    5.07    0.15 
  -2  10  -4    5.36    0.23 
  -2  10  -4    5.13    0.36 
   2  10   4    5.14    0.33 
   2 -10   4    5.20    0.19 
   2 -10   4    5.53    0.52 
   2 -10   4    5.22    0.19 
  -2 -10  -4    5.41    0.23 
  -2 -10  -4    5.34    0.17 
  -2 -10  -4    5.58    0.44 
   2  10   5   13.62    0.57 
  -2  10  -5   12.15    0.26 
  -2  10  -5   13.44    0.55 
   2  10   5   12.95    0.40 
  -2  10  -5   11.69    0.14 
   2 -10   5   11.56    0.21 
  -2 -10  -5   13.00    0.52 
  -2 -10  -5   12.76    0.36 
   2 -10   5   13.04    0.58 
   2 -10   5   12.42    0.22 
  -2  10  -6    7.32    0.16 
  -2  10  -6    8.04    0.54 
   2  10   6    8.23    0.57 
  -2  10  -6    7.95    0.26 
   2  10   6    7.81    0.38 
   2 -10   6    8.52    0.62 
  -2 -10  -6    7.38    0.16 
  -2 -10  -6    7.62    0.35 
   2 -10   6    7.27    0.16 
  -2 -10  -6    7.90    0.52 
   2  10   7    0.69    0.62 
  -2  10  -7    0.13    0.16 
   2  10   7    0.28    0.39 
  -2  10  -7    0.19    0.25 
  -2 -10  -7    0.02    0.36 
   2 -10   7   -0.08    0.21 
   2 -10   7    0.47    0.63 
  -2 -10  -7    0.27    0.23 
  -2  10  -8    4.96    0.30 
   2  10   8    5.92    0.71 
  -2  10  -8    4.74    0.17 
  -2 -10  -8    4.32    0.25 
   2 -10   8    5.24    0.69 
   2 -10   8    5.03    0.14 
   2 -10   8    4.60    0.23 
  -2  10  -9   17.57    0.35 
   2  10   9   19.14    0.84 
  -2 -10  -9   16.63    0.25 
   2 -10   9   17.93    0.81 
   2 -10   9   17.42    0.22 
   2 -10   9   17.37    0.28 
  -2  10 -10    1.49    0.35 
   2  10  10    1.88    0.82 
   2 -10  10    1.61    0.82 
  -2 -10 -10    1.64    0.33 
   2 -10  10    1.20    0.27 
  -2  10 -11   22.71    0.48 
   2  10  11   24.59    1.04 
   2 -10  11   23.26    1.00 
   2  10  12    1.76    0.89 
  -2  10 -12    1.83    0.39 
   2 -10  12    1.55    0.26 
   2 -10  12    1.23    0.90 
  -2 -10 -12    2.10    0.37 
   2  10  13    0.87    0.80 
  -2  10 -13   -0.48    0.42 
   2 -10  13   -0.47    0.98 
   2 -10  13   -0.95    0.28 
  -2 -10 -13   -0.13    0.40 
   2  10  14    0.05    0.81 
   2 -10  14   -0.72    1.03 
   2 -10  14   -0.04    0.27 
   2  10  15   -0.17    0.84 
   2 -10  15    0.04    1.11 
  -2  11  16    2.49    1.17 
   2  11 -16    2.05    0.68 
  -2 -11  16    0.58    1.05 
   2  11 -15    0.73    0.54 
  -2  11  15    2.66    1.12 
   2 -11 -15    0.30    0.44 
  -2 -11  15    1.64    1.03 
   2  11 -14    1.86    0.52 
  -2  11  14    1.28    1.02 
   2 -11 -14    0.70    0.40 
  -2 -11  14    1.36    0.75 
  -2  11  13    0.41    0.97 
   2  11 -13    0.78    0.50 
  -2 -11  13   -0.27    0.26 
  -2 -11  13   -0.27    0.91 
   2 -11 -13   -0.92    0.34 
  -2  11  12   -0.94    0.85 
   2  11 -12    0.68    0.52 
  -2 -11  12    0.22    0.18 
  -2 -11  12    0.52    0.86 
  -2 -11  12    0.22    0.27 
   2 -11 -12    0.52    0.28 
  -2  11  11    1.04    0.20 
   2  11 -11    0.65    0.16 
  -2  11  11    2.27    0.87 
   2  11 -11    0.95    0.44 
   2 -11 -11    0.81    0.23 
  -2 -11  11    0.74    0.15 
  -2 -11  11    0.62    0.81 
  -2 -11  11    0.28    0.26 
  -2  11  10   -0.05    0.18 
  -2  11  10   -0.22    0.78 
   2  11 -10    0.06    0.18 
   2  11 -10   -0.33    0.41 
  -2 -11  10    0.34    0.74 
   2 -11 -10    0.34    0.17 
  -2 -11  10    0.17    0.14 
  -2 -11  10   -0.15    0.26 
   2  11  -9   13.97    0.46 
   2  11  -9   14.46    0.60 
  -2  11   9   12.34    0.20 
  -2  11   9   15.10    0.81 
   2  11  -9   11.91    0.19 
  -2 -11   9   11.94    0.25 
  -2 -11   9   12.07    0.15 
  -2 -11   9   15.23    0.78 
   2 -11  -9   12.23    0.23 
   2  11  -8    0.12    0.15 
  -2  11   8    0.17    0.16 
  -2  11   8    0.03    0.47 
   2  11  -8    0.91    0.37 
   2  11  -8   -0.11    0.58 
  -2 -11   8   -0.05    0.20 
   2 -11  -8    0.77    0.60 
   2 -11  -8    0.29    0.18 
  -2 -11   8    0.22    0.10 
  -2 -11   8   -0.60    0.60 
   2  11  -7   19.27    0.41 
  -2  11   7   18.16    0.21 
  -2  11   7   21.97    0.73 
   2  11  -7   18.22    0.20 
   2  11  -7   21.22    0.65 
   2 -11  -7   17.84    0.20 
  -2 -11   7   20.81    0.56 
   2 -11  -7   20.79    0.65 
  -2 -11   7   17.74    0.12 
  -2 -11   7   18.11    0.25 
  -2  11   6  106.55    1.18 
  -2  11   6  106.75    1.26 
   2  11  -6  105.14    1.10 
   2  11  -6  107.69    1.25 
   2  11  -6  107.45    1.25 
  -2  11   6  105.25    1.13 
  -2 -11   6  104.65    1.22 
  -2 -11   6  107.90    0.99 
   2 -11  -6  105.44    1.37 
   2 -11  -6  106.17    1.24 
   2 -11  -6  104.17    1.32 
  -2 -11   6  107.14    1.34 
  -2  11   5    0.06    0.11 
   2  11  -5    0.69    0.17 
  -2  11   5    0.21    0.53 
   2  11  -5    0.15    0.32 
  -2  11   5    0.18    0.15 
  -2  11   5    0.05    0.36 
   2  11  -5    0.25    0.47 
   2 -11  -5    0.27    0.13 
   2 -11  -5   -0.10    0.47 
   2 -11  -5    0.15    0.34 
  -2 -11   5    0.08    0.19 
  -2 -11   5    0.00    0.26 
  -2 -11   5    0.31    0.49 
  -2 -11   5    0.18    0.06 
   2  11  -4   29.89    0.42 
   2  11  -4   32.50    0.63 
  -2  11   4   29.50    0.46 
  -2  11   4   32.47    0.70 
  -2 -11   4   31.54    0.28 
   2 -11  -4   29.27    0.44 
   2 -11  -4   32.23    0.65 
  -2 -11   4   32.22    0.65 
  -2 -11   4   32.54    0.64 
  -2  11   3    0.39    0.26 
  -2  11   3   -0.03    0.47 
  -2  11   3    0.45    0.09 
   2  11  -3    0.21    0.42 
   2  11  -3    0.36    0.30 
  -2  11   3    0.56    0.16 
  -2  11   3    0.50    0.41 
  -2 -11   3    0.59    0.45 
  -2 -11   3    0.31    0.25 
   2 -11  -3    0.42    0.17 
   2 -11  -3    0.42    0.11 
   2 -11  -3    0.19    0.30 
   2 -11  -3    0.53    0.44 
  -2 -11   3    0.50    0.15 
  -2 -11   3    0.37    0.04 
   2  11  -2   54.53    0.81 
  -2  11   2   53.65    0.81 
   2  11  -2   54.48    0.74 
  -2  11   2   54.86    0.68 
  -2  11   2   55.79    0.90 
  -2  11   2   55.06    0.82 
  -2  11   2   53.98    0.74 
   2 -11  -2   53.53    0.85 
  -2 -11   2   56.84    0.57 
   2 -11  -2   55.03    0.79 
  -2 -11   2   55.40    0.77 
  -2 -11   2   53.72    0.63 
   2 -11  -2   55.18    0.76 
  -2  11   1    6.15    0.37 
   2  11  -1    5.83    0.47 
   2  11  -1    4.91    0.32 
  -2  11   1    5.95    0.50 
  -2  11   1    6.14    0.46 
   2  11  -1    5.87    0.44 
  -2 -11   1    6.21    0.47 
   2 -11  -1    5.11    0.28 
   2 -11  -1    6.13    0.50 
  -2 -11   1    5.31    0.26 
   2  11   0   41.19    0.69 
   2  11   0   40.17    0.70 
  -2  11   0   40.12    0.65 
  -2  11   0   44.35    0.80 
   2  11   0   41.19    0.52 
   2  11   0   40.87    0.78 
   2  11   0   41.60    0.67 
  -2  11   0   40.23    0.74 
  -2  11   0   41.98    0.58 
  -2  11   0   41.02    0.71 
   2 -11   0   40.66    0.75 
  -2 -11   0   41.19    0.63 
   2 -11   0   42.50    0.68 
   2 -11   0   41.81    0.71 
   2 -11   0   41.68    0.62 
  -2  11  -1    1.38    0.16 
   2  11   1    1.35    0.08 
  -2  11  -1    1.61    0.42 
   2  11   1    1.42    0.32 
   2  11   1    1.58    0.43 
   2  11   1    1.53    0.29 
   2 -11   1    1.31    0.22 
   2 -11   1    1.33    0.08 
   2 -11   1    1.17    0.45 
   2 -11   1    1.63    0.19 
  -2 -11  -1    2.41    0.29 
   2  11   2    4.74    0.28 
   2  11   2    4.14    0.41 
  -2  11  -2    4.15    0.45 
   2  11   2    3.92    0.09 
   2  11   2    3.70    0.45 
  -2  11  -2    4.46    0.29 
   2  11   2    4.10    0.16 
  -2  11  -2    3.96    0.17 
   2 -11   2    3.97    0.48 
   2 -11   2    4.03    0.16 
   2 -11   2    3.83    0.08 
   2 -11   2    4.16    0.24 
  -2 -11  -2    4.21    0.41 
  -2 -11  -2    4.51    0.29 
  -2 -11  -2    4.07    0.13 
   2  11   3   16.46    0.38 
  -2  11  -3   17.57    0.53 
   2  11   3   17.31    0.54 
  -2  11  -3   16.94    0.29 
   2 -11   3   17.01    0.56 
  -2 -11  -3   17.99    0.51 
  -2 -11  -3   16.53    0.34 
   2 -11   3   15.90    0.23 
   2 -11   3   16.82    0.27 
   2  11   4   37.20    0.90 
  -2  11  -4   37.59    0.70 
   2  11   4   38.83    0.84 
  -2  11  -4   37.74    0.81 
   2  11   4   37.69    0.84 
  -2  11  -4   36.78    0.80 
  -2 -11  -4   38.55    0.79 
   2 -11   4   37.28    0.77 
   2 -11   4   38.09    0.57 
   2 -11   4   37.64    0.85 
  -2 -11  -4   38.23    0.82 
   2  11   5    0.21    0.12 
  -2  11  -5    0.36    0.17 
  -2  11  -5    0.69    0.25 
  -2  11  -5    0.53    0.52 
   2  11   5    0.47    0.36 
   2  11   5    0.56    0.55 
   2 -11   5    0.74    0.22 
  -2 -11  -5    0.25    0.32 
   2 -11   5    0.33    0.20 
  -2 -11  -5    0.28    0.14 
   2 -11   5    0.52    0.57 
  -2 -11  -5    0.09    0.46 
  -2  11  -6   12.70    0.61 
  -2  11  -6   10.98    0.19 
  -2  11  -6   11.97    0.30 
   2  11   6   14.15    0.70 
   2  11   6   12.03    0.42 
   2 -11   6   12.98    0.55 
  -2 -11  -6   11.77    0.39 
   2 -11   6   11.08    0.23 
  -2 -11  -6   10.93    0.23 
   2  11   7   24.46    0.53 
  -2  11  -7   22.40    0.23 
  -2  11  -7   24.66    0.38 
   2 -11   7   27.49    0.86 
   2 -11   7   22.60    0.29 
  -2  11  -8    1.02    0.30 
   2  11   8    1.41    0.68 
  -2 -11  -8    1.14    0.26 
   2 -11   8    0.89    0.23 
   2 -11   8    1.47    0.55 
   2  11   9   -0.43    0.57 
  -2  11  -9    0.18    0.33 
  -2 -11  -9    0.03    0.30 
   2 -11   9    0.41    0.15 
   2 -11   9   -0.32    0.75 
   2 -11   9    0.24    0.25 
   2  11  10   22.03    0.90 
  -2  11 -10   21.08    0.40 
   2 -11  10   21.65    0.89 
   2 -11  10   20.20    0.28 
  -2 -11 -10   20.00    0.35 
  -2  11 -11    2.14    0.38 
   2  11  11    3.22    0.92 
  -2 -11 -11    2.47    0.28 
   2 -11  11    2.02    0.69 
   2 -11  11    3.10    0.29 
  -2  11 -12    1.55    0.40 
   2  11  12    1.71    0.95 
   2 -11  12    1.22    0.93 
  -2 -11 -12    1.60    0.39 
   2 -11  12    1.30    0.30 
   2  11  13    0.35    1.00 
  -2  11 -13   -0.14    0.43 
   2 -11  13    0.60    1.01 
   2 -11  13   -0.35    0.31 
  -2 -11 -13   -0.08    0.41 
   2  11  14    4.07    1.07 
   2 -11  14    2.79    1.06 
  -2 -11 -14    2.99    0.43 
   2 -11  14    2.08    0.33 
   2  11  15    1.97    1.15 
   2 -11  15    0.73    1.15 
  -2  12  16    0.05    1.18 
   2  12 -16   -0.52    0.64 
  -2 -12  16    0.70    1.12 
  -2  12  15    0.91    1.14 
   2  12 -15    1.25    0.64 
  -2 -12  15    0.13    1.05 
   2 -12 -15   -1.35    0.43 
   2  12 -14    0.67    0.59 
  -2  12  14   -0.20    1.03 
  -2 -12  14    0.81    0.98 
   2 -12 -14   -0.73    0.42 
   2  12 -13    4.72    0.58 
  -2  12  13    4.93    0.79 
  -2 -12  13    4.22    0.92 
   2 -12 -13    3.30    0.40 
  -2 -12  13    4.10    0.30 
   2  12 -12    1.43    0.48 
  -2  12  12    0.99    0.91 
  -2 -12  12    1.97    0.87 
   2 -12 -12    1.06    0.35 
  -2 -12  12    1.39    0.26 
  -2  12  11    1.87    0.84 
   2  12 -11    1.36    0.19 
  -2  12  11    1.70    0.20 
   2  12 -11    1.74    0.45 
  -2 -12  11    1.30    0.85 
   2 -12 -11    1.41    0.30 
  -2 -12  11    1.19    0.29 
  -2 -12  11    1.85    0.15 
   2  12 -10    6.86    0.49 
   2  12 -10    6.10    0.19 
  -2  12  10    7.27    0.64 
  -2  12  10    6.52    0.19 
  -2 -12  10    5.83    0.77 
   2 -12 -10    6.33    0.23 
  -2 -12  10    6.26    0.29 
  -2 -12  10    6.46    0.14 
   2  12  -9    0.77    0.18 
  -2  12   9    0.69    0.19 
  -2  12   9    0.32    0.55 
   2  12  -9    0.58    0.41 
  -2 -12   9    0.68    0.13 
  -2 -12   9    0.43    0.69 
  -2 -12   9   -0.10    0.24 
   2  12  -8    2.86    0.60 
   2  12  -8    2.91    0.18 
  -2  12   8    3.12    0.19 
   2  12  -8    3.07    0.42 
  -2  12   8    3.33    0.70 
   2 -12  -8    2.92    0.15 
  -2 -12   8    2.58    0.23 
  -2 -12   8    2.96    0.11 
  -2 -12   8    3.50    0.53 
   2  12  -7    3.89    0.37 
   2  12  -7    3.21    0.17 
  -2  12   7    4.35    0.51 
   2  12  -7    4.41    0.58 
  -2  12   7    3.33    0.18 
  -2 -12   7    3.98    0.60 
   2 -12  -7    3.28    0.17 
   2 -12  -7    3.55    0.56 
  -2 -12   7    3.35    0.23 
   2  12  -6   12.08    0.40 
   2  12  -6   13.11    0.60 
  -2  12   6   10.71    0.21 
  -2  12   6   10.23    0.16 
   2  12  -6   10.46    0.19 
  -2  12   6   13.09    0.65 
  -2 -12   6   10.54    0.25 
  -2 -12   6   10.43    0.09 
   2 -12  -6   10.21    0.17 
   2 -12  -6   13.89    0.64 
  -2 -12   6   13.18    0.63 
  -2  12   5    6.73    0.62 
  -2  12   5    4.43    0.10 
   2  12  -5    4.59    0.17 
   2  12  -5    5.09    0.28 
  -2  12   5    5.11    0.41 
   2  12  -5    6.00    0.53 
  -2  12   5    4.67    0.18 
  -2 -12   5    6.09    0.56 
  -2 -12   5    4.73    0.07 
  -2 -12   5    4.44    0.22 
   2 -12  -5    5.57    0.52 
  -2 -12   5    5.14    0.29 
   2 -12  -5    4.61    0.15 
  -2 -12   5    4.50    0.05 
   2 -12  -5    4.92    0.37 
  -2  12   4    1.10    0.54 
   2  12  -4    0.50    0.31 
   2  12  -4    1.14    0.47 
  -2  12   4    0.67    0.16 
  -2  12   4    0.91    0.37 
  -2  12   4    0.76    0.45 
   2  12  -4    1.01    0.17 
  -2  12   4    0.62    0.10 
   2 -12  -4   -0.02    0.33 
   2 -12  -4    0.59    0.48 
  -2 -12   4    0.54    0.04 
   2 -12  -4    0.51    0.13 
  -2 -12   4    0.89    0.49 
  -2 -12   4    0.51    0.21 
  -2 -12   4    0.75    0.27 
   2  12  -3   13.87    0.38 
   2  12  -3   12.65    0.19 
  -2  12   3   16.36    0.64 
  -2  12   3   13.20    0.18 
  -2  12   3   12.45    0.12 
  -2  12   3   14.36    0.43 
   2 -12  -3   12.53    0.14 
   2 -12  -3   14.51    0.34 
  -2 -12   3   14.70    0.36 
  -2 -12   3   13.20    0.25 
   2 -12  -3   13.04    0.20 
  -2  12   2   21.01    0.64 
   2  12  -2   21.40    0.52 
   2  12  -2   18.91    0.41 
  -2  12   2   21.28    0.52 
  -2  12   2   21.60    0.62 
  -2  12   2   18.81    0.42 
  -2 -12   2   21.11    0.47 
   2 -12  -2   19.09    0.40 
  -2 -12   2   19.45    0.38 
  -2 -12   2   21.38    0.60 
   2  12  -1   65.11    0.93 
  -2  12   1   65.28    0.96 
  -2  12   1   63.60    0.95 
   2  12  -1   67.03    0.81 
  -2  12   1   65.75    0.85 
   2  12  -1   66.62    0.99 
   2  12  -1   65.47    0.60 
  -2  12   1   64.00    0.76 
   2  12  -1   65.48    0.92 
  -2  12   1   65.76    0.90 
  -2 -12   1   64.83    0.80 
   2 -12  -1   65.16    0.83 
   2 -12  -1   66.56    0.86 
  -2 -12   1   64.79    0.89 
   2 -12  -1   65.55    0.90 
   2 -12  -1   63.25    1.00 
  -2 -12   1   66.70    0.81 
   2  12   0  127.70    1.38 
   2  12   0  127.81    1.33 
   2  12   0  127.34    1.06 
   2  12   0  126.92    1.27 
  -2  12   0  129.33    1.34 
  -2  12   0  128.02    1.37 
   2  12   0  126.47    1.34 
  -2  12   0  126.75    1.31 
  -2  12   0  126.63    1.33 
  -2  12   0  127.09    1.14 
   2 -12   0  126.83    1.42 
  -2 -12   0  128.37    1.34 
   2 -12   0  126.25    1.22 
   2 -12   0  125.74    1.32 
   2 -12   0  126.69    1.24 
  -2 -12   0  125.21    1.27 
   2  12   1   56.45    0.79 
  -2  12  -1   55.20    0.80 
   2  12   1   55.03    0.74 
  -2  12  -1   56.76    0.80 
   2  12   1   55.96    0.62 
   2  12   1   54.45    0.69 
  -2  12  -1   55.82    0.86 
   2  12   1   56.41    0.74 
   2 -12   1   55.99    0.70 
   2 -12   1   56.00    0.73 
  -2 -12  -1   56.77    0.96 
  -2 -12  -1   55.77    0.80 
   2 -12   1   55.81    0.71 
   2 -12   1   56.05    0.79 
   2  12   2   69.79    0.91 
  -2  12  -2   70.85    0.97 
  -2  12  -2   66.86    0.81 
   2  12   2   68.67    1.02 
   2  12   2   67.98    0.78 
   2  12   2   68.85    0.95 
   2  12   2   66.46    0.92 
  -2  12  -2   67.15    0.90 
   2 -12   2   67.17    0.82 
  -2 -12  -2   69.89    1.09 
   2 -12   2   66.81    0.89 
   2 -12   2   67.81    0.81 
  -2 -12  -2   67.91    0.78 
   2 -12   2   67.41    0.77 
  -2 -12  -2   68.18    0.90 
   2  12   3    7.72    0.18 
   2  12   3    9.31    0.41 
  -2  12  -3    8.19    0.20 
  -2  12  -3   10.28    0.47 
  -2  12  -3    9.68    0.33 
   2  12   3    7.97    0.12 
   2  12   3    9.82    0.56 
   2 -12   3    9.73    0.57 
   2 -12   3    8.02    0.19 
   2 -12   3    7.61    0.09 
  -2 -12  -3    8.48    0.34 
   2 -12   3    8.84    0.25 
  -2 -12  -3   10.60    0.54 
   2  12   4    4.43    0.18 
   2  12   4    3.98    0.12 
   2  12   4    5.31    0.40 
  -2  12  -4    4.22    0.19 
  -2  12  -4    5.89    0.56 
  -2  12  -4    4.88    0.30 
   2  12   4    6.35    0.60 
   2 -12   4    4.93    0.24 
   2 -12   4    4.91    0.45 
  -2 -12  -4    5.56    0.52 
  -2 -12  -4    4.12    0.20 
  -2 -12  -4    5.07    0.36 
   2 -12   4    4.30    0.23 
  -2  12  -5   37.85    0.68 
   2  12   5   35.32    0.54 
   2  12   5   37.59    0.69 
  -2  12  -5   35.13    0.40 
   2 -12   5   37.31    0.60 
  -2 -12  -5   34.75    0.47 
   2 -12   5   38.49    0.82 
  -2  12  -6   -0.15    0.17 
  -2  12  -6    0.34    0.25 
   2  12   6   -0.07    0.30 
   2  12   6    0.25    0.48 
  -2 -12  -6    0.04    0.20 
   2 -12   6   -0.02    0.16 
   2 -12   6    0.08    0.48 
  -2  12  -7    7.59    0.30 
   2  12   7    7.88    0.47 
   2  12   7    8.00    0.69 
   2 -12   7    7.32    0.54 
  -2 -12  -7    6.87    0.25 
   2 -12   7    6.94    0.24 
  -2  12  -8    2.17    0.33 
   2  12   8    2.50    0.70 
   2 -12   8    2.71    0.27 
  -2 -12  -8    1.83    0.27 
   2 -12   8    2.63    0.74 
  -2  12  -9    0.43    0.35 
   2  12   9    0.42    0.78 
   2 -12   9    0.63    0.27 
   2 -12   9    0.71    0.15 
   2 -12   9   -0.10    0.80 
  -2 -12  -9    0.69    0.24 
  -2  12 -10    0.90    0.37 
   2  12  10    0.96    0.87 
   2 -12  10    1.34    0.84 
   2 -12  10    1.34    0.28 
  -2 -12 -10    1.43    0.35 
  -2  12 -11    3.32    0.41 
   2  12  11    3.98    0.74 
   2 -12  11    2.88    0.69 
   2 -12  11    3.18    0.32 
  -2 -12 -11    2.71    0.37 
   2  12  12    0.55    0.97 
  -2  12 -12    1.36    0.43 
  -2 -12 -12    2.07    0.39 
   2 -12  12    1.19    0.29 
   2 -12  12    0.92    0.96 
   2  12  13    2.01    0.99 
  -2 -12 -13    2.09    0.42 
   2 -12  13    4.04    0.83 
   2 -12  13    2.02    0.29 
   2  12  14    1.73    1.10 
   2 -12  14   -0.67    0.28 
  -2 -12 -14   -0.59    0.45 
   2 -12  14    0.24    1.08 
   2  12  15    1.66    1.17 
   2 -12  15    0.66    1.15 
   2  13 -15    0.03    0.65 
  -2  13  15    0.82    1.17 
   2 -13 -15   -1.40    0.42 
  -2 -13  15   -0.46    1.02 
  -2  13  14    0.85    1.10 
   2  13 -14    0.66    0.62 
   2 -13 -14   -0.45    0.43 
  -2 -13  14   -0.16    0.99 
   2  13 -13    0.26    0.50 
  -2  13  13    2.76    1.01 
  -2 -13  13    0.25    0.30 
  -2 -13  13   -1.18    0.91 
   2 -13 -13    0.13    0.41 
   2  13 -12   -0.49    0.48 
  -2  13  12    0.46    0.97 
   2 -13 -12   -0.34    0.35 
  -2 -13  12   -0.53    0.92 
  -2 -13  12   -0.66    0.28 
  -2  13  11    2.69    0.22 
   2  13 -11    3.71    0.51 
  -2  13  11    4.19    0.91 
   2 -13 -11    2.99    0.28 
  -2 -13  11    2.30    0.32 
  -2 -13  11    2.39    0.87 
  -2  13  10    6.26    0.83 
   2  13 -10    4.62    0.46 
  -2  13  10    4.91    0.21 
  -2 -13  10    4.69    0.14 
  -2 -13  10    4.11    0.30 
  -2 -13  10    5.47    0.83 
   2 -13 -10    4.30    0.24 
  -2  13   9   16.50    0.83 
   2  13  -9   14.69    0.24 
   2  13  -9   16.10    0.49 
  -2  13   9   14.98    0.24 
  -2 -13   9   14.60    0.15 
  -2 -13   9   16.01    0.80 
  -2 -13   9   14.42    0.32 
   2  13  -8   16.51    0.24 
   2  13  -8   17.82    0.47 
  -2  13   8   19.44    0.84 
   2  13  -8   19.40    0.73 
  -2  13   8   17.31    0.26 
  -2 -13   8   17.23    0.31 
   2 -13  -8   16.32    0.19 
  -2 -13   8   16.55    0.14 
  -2 -13   8   19.13    0.75 
  -2  13   7    0.77    0.20 
   2  13  -7    0.65    0.17 
   2  13  -7    0.87    0.57 
  -2  13   7    0.99    0.66 
   2  13  -7    0.97    0.38 
  -2 -13   7    0.65    0.62 
   2 -13  -7    0.85    0.18 
  -2 -13   7    0.92    0.09 
   2 -13  -7    2.12    0.69 
  -2 -13   7    0.83    0.25 
   2  13  -6    8.97    0.48 
   2  13  -6    6.98    0.18 
  -2  13   6    7.29    0.20 
  -2  13   6    8.91    0.66 
   2  13  -6    8.36    0.40 
  -2 -13   6    7.25    0.05 
  -2 -13   6    7.50    0.08 
  -2 -13   6    7.53    0.25 
  -2 -13   6    8.78    0.60 
  -2 -13   6    8.06    0.31 
   2 -13  -6    7.19    0.13 
   2 -13  -6    8.57    0.59 
  -2  13   5    7.68    0.13 
  -2  13   5   10.45    0.68 
   2  13  -5    8.89    0.39 
   2  13  -5   10.22    0.59 
  -2  13   5    8.01    0.19 
  -2  13   5    9.53    0.44 
   2  13  -5    8.09    0.19 
  -2 -13   5    9.13    0.28 
   2 -13  -5   11.48    0.63 
   2 -13  -5    7.79    0.13 
  -2 -13   5    8.26    0.25 
  -2 -13   5   10.42    0.62 
  -2  13   4    3.48    0.49 
  -2  13   4    3.06    0.37 
  -2  13   4    4.32    0.58 
  -2  13   4    2.79    0.09 
  -2  13   4    2.85    0.18 
   2  13  -4    3.55    0.35 
   2  13  -4    2.95    0.18 
   2  13  -4    3.71    0.50 
  -2 -13   4    2.96    0.29 
  -2 -13   4    2.76    0.05 
   2 -13  -4    3.00    0.35 
   2 -13  -4    3.88    0.53 
   2 -13  -4    2.76    0.13 
  -2 -13   4    3.09    0.52 
  -2 -13   4    2.78    0.16 
   2  13  -3   13.58    0.39 
   2  13  -3   15.29    0.58 
   2  13  -3   12.19    0.20 
  -2  13   3   13.64    0.42 
  -2  13   3   11.68    0.12 
  -2  13   3   12.59    0.22 
  -2  13   3   15.19    0.56 
  -2  13   3   14.63    0.62 
   2 -13  -3   11.66    0.14 
   2 -13  -3   12.12    0.21 
   2 -13  -3   13.37    0.39 
   2 -13  -3   14.35    0.58 
  -2 -13   3   14.88    0.59 
  -2 -13   3   12.39    0.24 
  -2 -13   3   13.53    0.34 
   2  13  -2   89.03    0.88 
  -2  13   2   87.93    1.11 
  -2  13   2   86.60    1.03 
  -2  13   2   89.33    1.07 
   2  13  -2   87.68    0.91 
  -2  13   2   87.31    0.86 
  -2  13   2   88.21    0.88 
   2  13  -2   88.29    0.92 
   2 -13  -2   87.75    1.10 
  -2 -13   2   88.87    0.79 
  -2 -13   2   86.84    0.94 
   2 -13  -2   87.20    0.95 
   2 -13  -2   86.83    0.86 
  -2 -13   2   86.06    0.98 
   2  13  -1   19.24    0.38 
   2  13  -1   18.84    0.55 
  -2  13   1   16.79    0.24 
  -2  13   1   19.03    0.60 
  -2  13   1   20.02    0.50 
  -2  13   1   18.34    0.37 
   2  13  -1   19.26    0.50 
   2  13  -1   16.59    0.22 
   2  13  -1   17.97    0.40 
  -2 -13   1   19.86    0.59 
   2 -13  -1   16.53    0.24 
   2 -13  -1   17.88    0.37 
  -2 -13   1   18.14    0.37 
   2  13   0   17.59    0.42 
  -2  13   0   19.15    0.44 
   2  13   0   19.55    0.45 
  -2  13   0   18.75    0.52 
   2  13   0   18.81    0.49 
   2  13   0   19.84    0.62 
  -2  13   0   19.40    0.51 
  -2 -13   0   18.09    0.40 
   2 -13   0   17.71    0.36
[truncated: 1,432,200 more chars]
